# Supplementary material
Source: Research Square preprint supplement (doi:10.21203/rs.3.rs-9157940/v1)
Supplement: Supplementary file 1 [file 31757534a87e07bd5a4aed36.xlsx]

## Sheet: miRTarBase
ID	Species(miRNA)	Species(Target)	miRNA	Target	Reporter assay	Western blot	qPCR	Microarray	NGS	pSILAC	Other	CLIP-Seq	Sum	Number of paper
MIRT036702	hsa	hsa	hsa-miR-301b-3p	EGFR	0	0	0	0	1	0	0	0	1	1
MIRT734189	hsa	hsa	hsa-miR-634	EGFR	1	1	1	0	0	0	0	0	3	0
MIRT734191	hsa	hsa	hsa-miR-3934-5p	EGFR	0	1	0	1	0	0	0	0	2	0
MIRT007069	hsa	hsa	hsa-miR-133b	EGFR	1	1	1	0	0	0	0	0	3	3
MIRT438024	hsa	hsa	hsa-miR-218-5p	EGFR	1	0	0	0	1	0	0	0	2	2
MIRT731713	hsa	hsa	hsa-miR-132-3p	EGFR	1	1	1	0	0	0	0	0	3	1
MIRT733293	hsa	hsa	hsa-miR-128-2-5p	EGFR	0	0	1	0	0	0	0	0	1	0
MIRT035541	hsa	hsa	hsa-let-7a-5p	EGFR	1	0	0	0	0	0	0	0	1	1
MIRT005807	hsa	hsa	hsa-miR-21-5p	EGFR	1	1	1	1	0	0	1	0	5	2
MIRT007360	hsa	hsa	hsa-miR-27a-3p	EGFR	1	1	1	0	0	0	0	0	3	2
MIRT054487	hsa	hsa	hsa-miR-219a-5p	EGFR	1	1	1	1	0	0	0	0	4	1
MIRT733444	hsa	hsa	hsa-miR-200b-3p	EGFR	1	1	1	0	0	0	0	0	3	0
MIRT007032	hsa	hsa	hsa-miR-133a-3p	EGFR	1	1	1	0	0	0	0	0	3	5
MIRT734109	hsa	hsa	hsa-miR-138-5p	EGFR	1	1	1	0	0	0	0	0	3	0
MIRT737297	hsa	hsa	hsa-miR-9-3p	EGFR	1	1	1	0	0	0	0	0	3	0
MIRT736523	hsa	hsa	hsa-miR-193a-3p	EGFR	1	1	0	0	0	0	0	0	2	0
MIRT054661	hsa	hsa	hsa-miR-302b-3p	EGFR	1	1	1	0	0	0	0	0	3	1
MIRT756387	hsa	hsa	hsa-miR-370-3p	EGFR	0	0	0	0	0	0	0	0	4	1
MIRT756070	hsa	hsa	hsa-miR-377-3p	EGFR	0	0	0	0	0	0	0	0	2	1
MIRT734078	hsa	hsa	hsa-miR-557	EGFR	1	1	1	1	0	0	0	0	4	0
MIRT054243	hsa	hsa	hsa-miR-574-3p	EGFR	1	1	1	1	0	0	0	0	4	1
MIRT733741	hsa	hsa	hsa-miR-646	EGFR	1	1	1	1	0	0	0	0	4	0
MIRT006330	hsa	hsa	hsa-miR-542-5p	EGFR	1	1	1	0	0	0	0	0	3	1
MIRT736974	hsa	hsa	hsa-miR-802	EGFR	1	1	1	0	0	0	0	0	3	0
MIRT736365	hsa	hsa	hsa-miR-486-3p	EGFR	1	1	1	0	0	0	0	0	3	0
MIRT732238	hsa	hsa	hsa-miR-875-5p	EGFR	1	1	0	0	0	0	0	0	2	1
MIRT731611	hsa	hsa	hsa-miR-2861	EGFR	1	1	0	0	0	0	0	0	2	1
MIRT737367	hsa	hsa	hsa-miR-3622b-5p	EGFR	1	1	0	0	1	0	0	0	3	0
MIRT734664	hsa	hsa	hsa-miR-133a-5p	EGFR	1	0	0	0	0	0	0	0	1	0
MIRT018378	hsa	hsa	hsa-miR-335-5p	EGFR	0	0	0	1	0	0	0	0	1	1
MIRT734684	hsa	hsa	hsa-miR-21-3p	EGFR	0	0	0	1	0	0	0	0	1	0
MIRT734685	hsa	hsa	hsa-miR-146a-3p	EGFR	0	0	0	1	0	0	0	0	1	0
MIRT734686	hsa	hsa	hsa-miR-146b-3p	EGFR	0	0	0	1	0	0	0	0	1	0
MIRT736982	hsa	hsa	hsa-miR-4328	EGFR	0	0	0	1	0	0	0	0	1	0
MIRT003325	hsa	hsa	hsa-miR-145-5p	EGFR	0	1	1	1	0	0	0	0	3	2
MIRT732244	hsa	hsa	hsa-miR-7-1-3p	EGFR	0	1	1	1	0	0	0	0	3	1
MIRT004353	hsa	hsa	hsa-miR-128-3p	EGFR	0	1	0	0	0	0	1	0	2	2
MIRT028600	hsa	hsa	hsa-miR-30a-5p	EGFR	0	0	0	0	0	0	1	0	1	1
MIRT020911	hsa	hsa	hsa-miR-155-5p	EGFR	1	1	1	1	0	0	1	0	5	1
MIRT001470	hsa	hsa	hsa-miR-16-5p	EGFR	0	0	0	0	0	1	1	0	2	1
MIRT001370	hsa	hsa	hsa-miR-1-3p	EGFR	0	0	0	0	0	1	1	0	2	1
MIRT733417	hsa	hsa	hsa-miR-181a-5p	EGFR	0	0	1	0	0	0	0	0	1	0
MIRT732647	hsa	hsa	hsa-miR-608	EGFR	0	0	1	0	0	0	0	0	1	0
MIRT054888	hsa	hsa	hsa-miR-125a-5p	EGFR	0	1	1	0	0	0	0	0	2	1
MIRT004730	hsa	hsa	hsa-miR-146a-5p	EGFR	1	1	1	0	0	0	1	0	4	7
MIRT006585	hsa	hsa	hsa-miR-128b	EGFR	1	1	1	0	0	0	0	0	3	2
MIRT002289	hsa	hsa	hsa-miR-7-5p	EGFR	1	1	1	1	0	0	1	0	5	15
MIRT737349	hsa	hsa	hsa-miR-137	EGFR	0	1	1	1	0	0	0	0	3	0
MIRT736883	hsa	hsa	hsa-miR-145-3p	EGFR	0	1	1	0	0	0	0	0	2	0
MIRT737365	hsa	hsa	hsa-miR-200c-3p	EGFR	0	1	1	0	1	0	0	0	3	0
MIRT587334	mmu	mmu	mmu-miR-129-5p	Egfr	0	0	0	0	1	0	0	1	2	2
MIRT587336	mmu	mmu	mmu-miR-433-3p	Egfr	0	0	0	0	1	0	0	0	1	1
MIRT587337	mmu	mmu	mmu-miR-3088-3p	Egfr	0	0	0	0	1	0	0	0	1	1
MIRT587335	mmu	mmu	mmu-miR-5101	Egfr	0	0	0	0	1	0	0	1	2	2
MIRT054533	mmu	mmu	mmu-miR-30c-5p	Egfr	1	0	1	0	0	0	0	0	2	1
MIRT755384	hsa	mmu	hsa-miR-7-2-3p	EGFR	0	0	0	0	0	0	0	0	3	1
MIRT003718	mmu	mmu	mmu-miR-30a-5p	Egfr	1	0	1	1	0	0	1	0	4	2

## Sheet: miRWalk
mirnaid	refseqid	genesymbol	duplex	start	end	bindingp	energy	seed	accessibility	au	phylopstem	phylopflank	me	number_of_pairings	binding_region_length	longest_consecutive_pairings	position	validated	TargetScan	miRDB
hsa-let-7a-5p	NM_001346897	EGFR	TGAGGTAGTAGGTTGTATAGTT#CTGGAAACAGTCCTGCTCCTCAA#(((((.((((((((((......#.)))).))))))))))).	3410	3433	0.846154	-19.8	0	0.00888355	0.412	-0.529317	1.10686	-5.83853	15	18	11	CDS	MIRT035541	0	0
hsa-let-7a-2-3p	NM_001346897	EGFR	CTGTACAGCCTCCTAGCTTTCC#GAAGGCGCCACATCGTTCGGAAGCGCACGCTGCGGAGGCTGCTGCAGG#((((((((((((((((((((((#.))))).....)))).)))))))).))))).	2131	2179	0.969231	-29.8	1	9.93e-07	0.368	3.30039	3.37024	-3.93757	22	31	8	CDS		0	0
hsa-let-7b-5p	NM_001346897	EGFR	TGAGGTAGTAGGTTGTGTGGTT#ATCACGCAGCTCATGCCCTTCGGCTGCCTCC#.((((((((.(((((((((((.#)))))))))))...........)))))))).	2490	2521	0.923077	-23.5	1	2.38e-05	0.441	3.82622	4.91342	-5.03583	19	31	11	CDS		0	0
hsa-let-7c-5p	NM_001346897	EGFR	TGAGGTAGTAGGTTGTATGGTT#ACCGTGCAGCTCATCACGCAGCTCATGCCCTTCGGCTGCCTCC#.((((((((.(((((((((((.#))))))))))).......................)))))))).	2478	2521	0.846154	-23.4	1	2.38e-05	0.441	4.45316	5.09246	-5.03583	19	43	11	CDS		0	0
hsa-let-7e-5p	NM_001346897	EGFR	TGAGGTAGGAGGTTGTATAGTT#GCTCCTCAACCTCCTCGACCCAC#((.((((((((((((...(((.#)))...)))))))))..))))).	3424	3447	0.923077	-19.7	0	0.263035	0.412	-1.07562	0.597063	-5.72816	17	23	9	CDS		0	0
hsa-let-7e-3p	NM_001346897	EGFR	CTATACGGCCTCCTAGCTTTCC#GCTGCGGAGGCTGC#.....((((((((((((.....#)))).)))))))).	2159	2173	0.846154	-21	0	1.02e-06	0.338	3.00203	3.76577	-13.6656	12	14	8	CDS		0	0
hsa-let-7f-5p	NM_001346897	EGFR	TGAGGTAGTAGATTGTATAGTT#CTGGAAACAGTCCTGCTCCTCAA#(((((.((((((((((......#.)))))).))))))))).	3410	3433	0.846154	-17.8	0	0.00888355	0.412	-0.529317	1.10686	-5.83853	15	18	9	CDS		0	0
hsa-miR-15a-5p	NM_001346897	EGFR	TAGCAGCACATAATGGTTTGTG#GCAAGTCCCCCAGTGACTGCTGCCACAACCAGTGTGCTGCA#..(((((((((..(((.(((((#.))))))))))))))))).	799	840	0.923077	-23.8	1	0.000813371	0.338	4.34735	3.98546	-9.59293	17	19	17	CDS		0	0
hsa-miR-15a-5p	NM_001346897	EGFR	TAGCAGCACATAATGGTTTGTG#CGCCGGCCATGTGTGCCACCTGTGCC#..(((((((((.((((((.(((#))).))))))))))))......))).	1961	1987	0.923077	-18.1	1	3.05e-05	0.382	3.83683	3.437	-8.3038	18	26	12	CDS		0	0
hsa-miR-17-5p	NM_001346897	EGFR	CAAAGTGCTTACAGTGCAGGTAG#GCCTGCACAAGCTCTTTGT#(((((.((((...((((((((..#)))))))))))).))))).	3569	3588	0.884615	-23.2	0	0.000249143	0.529	-0.794096	-0.625843	-13.2992	17	19	12	3UTR		1	0
hsa-miR-17-5p	NM_001346897	EGFR	CAAAGTGCTTACAGTGCAGGTAG#GCCTCCGCCCCCCGCACGGTGTGAGCGCC#....(((((((((((((.((...#.)).))))..))))))))).	39	68	0.846154	-21.1	0	5.46e-05	0.176	-0.349656	-0.053274	-9.54656	15	20	9	5UTR		1	0
hsa-miR-17-3p	NM_001346897	EGFR	ACTGCAGTGAAGGCACTTGTAG#ACAGGCGCCTTGACTGAGG#.((.((((.(((((.(((((..#))))).))))).)))))).	3345	3364	0.923077	-22.6	0	0.000126561	0.412	2.7144	2.6273	-8.61719	16	19	6	CDS		0	0
hsa-miR-18a-5p	NM_001346897	EGFR	TAAGGTGCATCTAGTGCAGATAG#CTGCACCTACGGATGCACTG#...(((((((((.((((((....#))))))....))))))))).	1994	2014	0.846154	-21.9	0	0.000188747	0.426	1.95896	2.06237	-7.80367	15	20	9	CDS		0	0
hsa-miR-18a-5p	NM_001346897	EGFR	TAAGGTGCATCTAGTGCAGATAG#CTACTTGGAGGACCGTCGCTTGGTGCACCG#...((((((((.((((.......#.)))).)))))))).	2603	2633	0.846154	-18.6	0	1.92e-05	0.382	6.12175	5.49882	-9.86134	12	15	8	CDS		0	0
hsa-miR-18a-3p	NM_001346897	EGFR	ACTGCCCTAAGTGCTCCTTCTGG#CAGGGCCAAAAGTGTGATCCAAGCTGTCCCAATGGGAGCTGCTGGGGTGCAGG#.(((((((.(((((((((..(((#.)))..)))))).))).))).)))).	681	734	0.923077	-26.7	1	1.12e-05	0.456	2.81422	2.67578	-4.84971	19	26	6	CDS		0	0
hsa-miR-18a-3p	NM_001346897	EGFR	ACTGCCCTAAGTGCTCCTTCTGG#CCAGAGGGGGAAACAGTGGCAGA#.(((((((.....((((((((((#))))))))))....)).))))).	3498	3521	0.846154	-26.1	1	0.00103524	0.426	-0.298289	-0.595934	-13.5529	17	23	10	CDS		0	0
hsa-miR-19b-1-5p	NM_001346897	EGFR	AGTTTTGCAGGTTTGCATCCAGC#GCTGGGTGCGGAAGAGAAAGAATACCATGCAGAAG#..(((((((((((((((((((((#)))))))))))............))).))))))).	2708	2743	0.923077	-25.5	1	0.000669064	0.5	4.96472	5.6348	-4.957	21	35	11	CDS		0	1
hsa-miR-19b-1-5p	NM_001346897	EGFR	AGTTTTGCAGGTTTGCATCCAGC#GCTGGCTCTATCTTGACCTGTGAAACG#.((((((((((((.....(((((#))))).........)))))))))))).	3765	3792	1	-21.3	1	0.00660696	0.676	0.242812	-0.0339411	-5.61866	17	27	12	3UTR		0	1
hsa-miR-19b-3p	NM_001346897	EGFR	TGTGCAAATCCATGCAAAACTGA#CAGGGAATGCGTGGACAAGTGCAA#(((((...((((((((...(((.#)))....))))))))...))))).	1721	1745	0.923077	-19.3	0	0.00145552	0.426	4.30717	2.7395	-9.69585	16	24	8	CDS		0	0
hsa-miR-19b-2-5p	NM_001346897	EGFR	AGTTTTGCAGGTTTGCATTTCA#GAAATGGGCTGCAAAGCTG#((((((((((.....((((((.#))))))..)))))))))).	3280	3299	0.846154	-20	1	6.78e-05	0.485	1.75116	2.93689	-12.9906	16	19	10	CDS		0	1
hsa-miR-19b-2-5p	NM_001346897	EGFR	AGTTTTGCAGGTTTGCATTTCA#GAGGTGAAAACAGCTGCAAGGCC#.(((((((((((((.((((((.#)))))).))))..))))))))).	1606	1629	0.923077	-19.8	1	7.82e-05	0.5	1.75183	2.83038	-4.52877	19	23	9	CDS		0	1
hsa-miR-19b-2-5p	NM_001346897	EGFR	AGTTTTGCAGGTTTGCATTTCA#GGAGAGGGAGCTTGTGGAGCC#.(((((((((((((.(.((((.#)))).).))))))))))))).	2177	2198	0.923077	-19.1	1	8.06e-08	0.368	5.48392	4.18363	-4.52877	18	21	13	CDS		0	1
hsa-miR-19b-2-5p	NM_001346897	EGFR	AGTTTTGCAGGTTTGCATTTCA#GAAGTGCGAAGGGCCTTGCCGCAAAGT#..(((((((((((((((((((.#)))))))))...))))....)))))).	1106	1133	0.846154	-18.7	1	0.00010208	0.529	4.52374	3.11237	-4.957	19	27	9	CDS		0	1
hsa-miR-20a-5p	NM_001346897	EGFR	TAAAGTGCTTATAGTGCAGGTAG#GCCTGCACAAGCTCTTTGT#(((((.((((...((((((((..#)))))))))))).))))).	3569	3588	0.807692	-21.6	0	0.000249143	0.529	-0.794096	-0.625843	-13.2992	17	19	12	3UTR		1	0
hsa-miR-22-3p	NM_001346897	EGFR	AAGCTGCCAGTTGAAGAACTGT#GGTGCACCGCGACCTGGCAGCC#..(((((((((((....(((..#)))......)))).))))))).	2624	2646	0.846154	-18.4	1	2.8e-06	0.382	5.29787	5.57196	-6.78234	14	22	7	CDS		0	0
hsa-miR-23a-5p	NM_001346897	EGFR	GGGGTTCCTGGGGATGGGATTT#AGATCCCGTCCATCGCCACTGGGATGGTGGGGGCCCTC#((((((((((((((((((((((#)))))))))))....)))...........)))))))).	2050	2088	0.923077	-28.3	1	7.57e-08	0.338	2.93481	2.4138	-3.93757	22	38	11	CDS		0	0
hsa-miR-23a-5p	NM_001346897	EGFR	GGGGTTCCTGGGGATGGGATTT#CCCGGAGCCCAGGGACTGCG#(.((((((((((..((((....#))))...)))))))))).).	1676	1696	0.846154	-27.8	1	5.92e-05	0.265	1.97088	2.74855	-7.24722	15	20	10	CDS		0	0
hsa-miR-23a-3p	NM_001346897	EGFR	ATCACATTGCCAGGGATTTCC#GGAATCCCTGCCAGCGAGATC#(((.(.(((.((((((((((.#)))))))))).))).).))).	2874	2895	0.871795	-18.6	0	0.0022517	0.441	4.59712	5.2585	-10.1131	17	21	10	CDS		0	0
hsa-miR-24-1-5p	NM_001346897	EGFR	TGCCTACTGAGCTGATATCAGT#GCTTCTTGCAGCGATACAGCTCAGACCCCACAGGCG#.((((.((((((((.((((.((#.)))))))))))))).......)))).	3316	3352	1	-20.6	0	0.0113151	0.426	3.02694	2.08548	-6.42973	18	27	14	CDS		0	0
hsa-miR-24-1-5p	NM_001346897	EGFR	TGCCTACTGAGCTGATATCAGT#ACTGCGTCTCTTGCCGGAATGTCAGCCGAGGCAG#(((((..((.((((((((....#.))))))))))))))).	1690	1724	0.923077	-17.9	0	1.59e-05	0.397	4.01185	3.31129	-8.62473	15	17	15	CDS		0	0
hsa-miR-24-3p	NM_001346897	EGFR	TGGCTCAGTTCAGCAGGAACAG#CTGGCGCTGCTGGCTGCGCTC#.(((.(((.(((((((...(((#)))...)))))))))).))).	294	315	0.846154	-21.8	0	4.4e-06	0.265	0.857567	0.533947	-8.96875	16	21	10	CDS		0	0
hsa-miR-25-5p	NM_001346897	EGFR	AGGCGGAGACTTGGGCAATTG#CAGGCCACCTCGTCGGCGTCCGCCCGAGTCCCCGCCTC#((((((.(((((((((.....#.))))))))).)))))).	134	172	0.923077	-30.6	0	0.0068622	0.235	-0.139975	-0.186461	-5.48126	15	18	9	5UTR		0	0
hsa-miR-25-3p	NM_001346897	EGFR	CATTGCACTTGTCTCGGTCTGA#CAGGGAATGCGTGGACAAGTGCAAC#..((((((((((((..(((((.#))).....))..)))))))))))).	1721	1746	0.884615	-21.3	1	0.000488208	0.441	3.44309	2.83187	-5.9255	17	25	12	CDS		0	0
hsa-miR-26a-1-3p	NM_001346897	EGFR	CCTATTCTTGGTTACTTGCACG#GTGTGTAACGGAATAGGT#((((((((..(((((..((((.#))))))))))))))))).	1131	1149	0.923077	-18.2	1	0.0104061	0.544	4.51278	3.54278	-6.46952	17	18	17	CDS		0	0
hsa-miR-26b-3p	NM_001346897	EGFR	CCTGTTCTCCATTACTTGGCT#AGCCAAGGGAGTTTGTGGAGAACT#...(((((((((..(((((((#))))))).......))))))))).	1759	1783	0.923077	-22.8	0	0.000154045	0.441	2.51845	3.20617	-8.66051	16	24	9	CDS		0	0
hsa-miR-26b-3p	NM_001346897	EGFR	CCTGTTCTCCATTACTTGGCT#AGATAAGTGATGGAGATGTGATAATTTCAGGA#((((.(((((((((((((.((#)).)))))))))))))...........)))).	1489	1521	0.923077	-20.1	0	0.0106865	0.676	5.50372	2.39168	-8.05661	19	32	13	CDS		0	0
hsa-miR-27a-5p	NM_001346897	EGFR	AGGGCTTAGCTGCTTGTGAGCA#GCTCACGCAGTTGGGCACTTT#(((((((((((((..((((((.#)))))))))))))))).))).	371	392	0.923077	-26.5	1	0.00158938	0.5	1.5187	2.59366	-5.52986	19	21	16	CDS	MIRT733034	0	0
hsa-miR-28-5p	NM_001346897	EGFR	AAGGAGCTCACAGTCTATTGAG#TTCAATAACTGTGAGGTGGTCCTTG#(((((.((((((((.(((((((#))))))))))))))...).))))).	423	448	0.846154	-20.6	0	6.64e-05	0.529	4.25098	2.90239	-6.57398	20	25	14	CDS		0	0
hsa-miR-29a-5p	NM_001346897	EGFR	ACTGATTTCTTTTGGTGTTCAG#CTGAAAACCGTAAAGGAAATCAC#..((((((((((((((.(((((#))))).))))..)))))))))).	1308	1331	0.846154	-18.2	1	0.00339802	0.559	4.37843	3.12099	-4.957	19	23	10	CDS		0	0
hsa-miR-29a-5p	NM_001346897	EGFR	ACTGATTTCTTTTGGTGTTCAG#GATCATCAGAGGAAATATGTA#((..(((((((((((((.((..#)).)))))))))))))..)).	575	596	0.846154	-18.4	0	0.000645787	0.603	4.74408	2.65533	-8.52714	17	21	13	CDS		0	0
hsa-miR-30a-5p	NM_001346897	EGFR	TGTAAACATCCTCGACTGGAAG#TTTCTCAGCCTCCAGAGGATGTTC#....(((((((((...((((..#.))))))))))))).	402	426	0.923077	-17.2	0	2.8e-05	0.588	2.0522	3.31397	-11.3719	13	15	13	CDS	MIRT028600	0	0
hsa-miR-30a-3p	NM_001346897	EGFR	CTTTCAGTCGGATGTTTGCAGC#GCAGTCTTATCTAACTATGATGCAAATAAAACCGGACTGAAGGA#(((((((((((.((((((((..#.))))))))...))).)))))))).	618	662	1	-22.8	1	0.043204	0.588	1.95017	2.72022	-7.28438	19	25	8	CDS		0	0
hsa-miR-33a-5p	NM_001346897	EGFR	GTGCATTGTAGTTGCATTGCA#TGCACCTACGGATGCACT#(((((((((((.((((.....#)))).))))).)))))).	1995	2013	0.846154	-19	1	0.000237323	0.426	2.44042	2.40831	-7.28438	15	18	6	CDS		0	0
hsa-miR-92a-3p	NM_001346897	EGFR	TATTGCACTTGTCCCGGCCTGT#GCGTGGACAAGTGCAAC#..((((((((((((..((....#))..)))))))))))).	1729	1746	1	-24.1	1	0.000488208	0.441	3.44309	2.83187	-5.9255	14	17	12	CDS		0	0
hsa-miR-92a-2-5p	NM_001346897	EGFR	GGGTGGGGATTTGTTGCATTAC#GCCCGAGTCCCCGCCTC#(((((((((((((..((.....#)).))))))))))))).	155	172	0.807692	-24.6	1	0.0068622	0.235	-0.474735	-0.148629	-5.52986	15	17	13	5UTR		0	0
hsa-miR-92a-2-5p	NM_001346897	EGFR	GGGTGGGGATTTGTTGCATTAC#AGTGCATACAGTGCCACCCA#((((((....((((((((((..#)))))).))))..)))))).	1786	1806	0.846154	-21.3	0	0.00355004	0.456	2.81738	3.09657	-10.0938	16	20	6	CDS		0	0
hsa-miR-96-3p	NM_001346897	EGFR	AATCATGTGCAGTGCCAATATG#GTGCTCCGGGCGCTGCCGTGGC#..(((((.((((((((......#.))))))))))))).	779	801	0.923077	-21.5	0	1.4e-08	0.353	2.81807	3.87358	-7.27064	13	15	13	CDS		0	0
hsa-miR-96-3p	NM_001346897	EGFR	AATCATGTGCAGTGCCAATATG#TGGCGCTGCT#........(((((((((.....#))))))))).	295	305	0.923077	-17.7	0	6.12e-08	0.206	0.107291	0.35859	-19.4239	9	10	9	CDS		0	0
hsa-miR-96-3p	NM_001346897	EGFR	AATCATGTGCAGTGCCAATATG#GGAGCTGCCCATGAG#..(((((.(((((.((......#)).))))).))))).	659	674	1	-17.4	0	0.0225843	0.559	4.03446	2.24584	-8.12748	12	15	5	CDS		0	0
hsa-miR-99a-5p	NM_001346897	EGFR	AACCCGTAGATCCGATCTTGTG#GTCTGGAGCTACGGGG#..(((((((.((((((......#))).))).))))))).	2814	2830	0.865385	-18.6	1	0.000105812	0.5	6.76496	5.17693	-6.19951	13	16	7	CDS		0	0
hsa-miR-99a-3p	NM_001346897	EGFR	CAAGCTCGCTTCTATGGGTCTG#GACTCCGTCCAGTATTGATCGGGAGAGCCGGAGCGAGCTC#..((((((((((...((.(((.#.))).)))))))))))).	207	247	0.846154	-23.5	1	4.45e-06	0.338	-0.222067	-0.144178	-7.83842	15	18	12	5UTR		0	0
hsa-miR-100-5p	NM_001346897	EGFR	AACCCGTAGATCCGAACTTGTG#GTCTGGAGCTACGGGG#..(((((((.((((.((.....#)).)))).))))))).	2814	2830	0.923077	-19.5	1	0.000105812	0.5	6.76496	5.17693	-6.93496	13	16	7	CDS		0	0
hsa-miR-29b-2-5p	NM_001346897	EGFR	CTGGTTTCACATGGTGGCTTAG#GCCGGCCATGTGTGCCAC#.((((..(((((((((((....#)))).))))))).)))).	1962	1980	0.846154	-22.7	0	0.000281792	0.397	0.491424	3.43148	-7.23797	15	18	7	CDS		0	0
hsa-miR-103a-2-5p	NM_001346897	EGFR	AGCTTCTTTACAGTGCTGCCTTG#GAGGGAGCTTGTGGAGCCTCTTACACCCAGTGGAGAAGCTC#(((((((((((...(((.((((.#)))).))).....................))))))))))).	2180	2221	0.807692	-21.4	1	0.000407998	0.456	5.97887	4.81329	-9.43035	18	41	11	CDS		0	0
hsa-miR-103a-3p	NM_001346897	EGFR	AGCAGCATTGTACAGGGCTATGA#CATGCCTTGTGCTCCCCCGAGGGCTGCTG#((((((...(((((((((.(((.#))))))))))))..........)))))).	1644	1673	0.923077	-24.6	0	1.19e-05	0.294	1.94463	2.58726	-8.85129	18	29	12	CDS		0	0
hsa-miR-103a-3p	NM_001346897	EGFR	AGCAGCATTGTACAGGGCTATGA#GGCCCTCCTCTTGCTGCTG#(((((((......((((((....#)))))).....))))))).	2081	2100	0.923077	-21.7	1	0.00889659	0.338	0.788582	2.63869	-16.0108	13	19	7	CDS		0	0
hsa-miR-103a-1-5p	NM_001346897	EGFR	GGCTTCTTTACAGTGCTGCCTTG#CAAGGGAGTTTGTGGAGAACTCTGAGTGCATACAGTGCCA#(((((((((((((.(((.(((((#))))).))))))))))))).................))).	1762	1802	1	-22.5	1	0.000321856	0.456	2.40687	3.23024	-4.79441	21	40	13	CDS		0	0
hsa-miR-103a-1-5p	NM_001346897	EGFR	GGCTTCTTTACAGTGCTGCCTTG#GAGGGAGCTTGTGGAGCCT#((((((...((((.(((.((((.#)))).))))))))))))).	2180	2199	0.846154	-22	0	4.7e-08	0.382	5.84361	4.34782	-9.70813	17	19	13	CDS		0	0
hsa-miR-105-5p	NM_001346897	EGFR	TCAAATGCTCAGACTCCTGTGGT#GCCCGGCAGGAGTCATGGGA#.......((((((((((((((((#)))..))))))))).)))).	1909	1929	0.846154	-22.3	0	1.88e-06	0.397	3.42829	3.17886	-17.1102	16	20	9	CDS		0	0
hsa-miR-105-3p	NM_001346897	EGFR	ACGGATGTTTGAGCATGTGCTA#CACGGCTCGTGCGTCCGA#.(((((((.(((((.((((...#))))))))).))))))).	1035	1053	0.846154	-22.5	1	8.02e-05	0.426	5.41474	4.16258	-5.58516	16	18	9	CDS		0	0
hsa-miR-106a-5p	NM_001346897	EGFR	AAAAGTGCTTACAGTGCAGGTAG#GCCTGCACAAGCTCTTTG#.((((.((((...((((((((..#)))))))))))).)))).	3569	3587	0.807692	-21.1	0	2.18e-05	0.529	-0.794096	-0.625843	-13.155	16	18	12	3UTR		1	0
hsa-miR-106a-5p	NM_001346897	EGFR	AAAAGTGCTTACAGTGCAGGTAG#GCCTCCGCCCCCCGCACGGTGTGAGCGCC#....(((((((((((((.((...#.)).))))..))))))))).	39	68	0.846154	-21.1	0	5.46e-05	0.176	-0.349656	-0.053274	-9.54656	15	20	9	5UTR		1	0
hsa-miR-107	NM_001346897	EGFR	AGCAGCATTGTACAGGGCTATCA#TGCCATGCCTTGTGCTCCCCCGAGGGCTGCTG#((((((...(((((((((.....#.)))))))))..........)))))).	1641	1673	0.923077	-23.2	0	1.19e-05	0.294	1.87171	2.61008	-8.85129	15	27	9	CDS		0	0
hsa-miR-107	NM_001346897	EGFR	AGCAGCATTGTACAGGGCTATCA#TGGGGGCCCTCCTCTTGCTGCTG#(((((((......((((((.(((#))).)))))).....))))))).	2077	2100	0.923077	-22.7	1	0.00889659	0.338	0.788582	2.63869	-16.0108	16	23	7	CDS		0	0
hsa-miR-16-2-3p	NM_001346897	EGFR	CCAATATTACTGTGCTGCTTTA#CGGCACGGTGTATAAGGGA#((..(((((((((((((.....#)))))))))).)))..)).	2294	2313	0.846154	-17.5	0	0.00694447	0.441	5.23937	5.57014	-8.52714	15	19	10	CDS		0	0
hsa-miR-192-3p	NM_001346897	EGFR	CTGCCAATTCCATAGGTCACAG#GTGGTCCTTGGGAATTTGGAAATTACCTATGTGCAGA#(((((((((((..(((((((..#)))).)))..)))))..............)).)))).	438	475	0.846154	-19	1	0.00199405	0.603	4.33608	3.61075	-8.57351	18	37	5	CDS		0	0
hsa-miR-197-5p	NM_001346897	EGFR	CGGGTAGAGAGGGCAGTGGGAGG#CCTCCGGGACGGCCGGGGCAGCGCTCCTGGCGCTGCTGGCTGCGCTCTGCCCGG#(((((((((..(((((((((((.#.))))...))))))).......))))))))).	268	322	0.846154	-31.6	1	1.31e-05	0.324	-0.636627	-0.263237	-8.00486	20	32	9	CDS		0	0
hsa-miR-197-5p	NM_001346897	EGFR	CGGGTAGAGAGGGCAGTGGGAGG#CCCCCACTGCGTCAAGACCTGCCCGG#(((((((...(.((((((((.((#)))))))))).)......))))))).	1889	1915	1	-29.6	1	0.00021364	0.412	4.00359	3.07348	-11.8969	18	26	10	CDS		0	0
hsa-miR-197-5p	NM_001346897	EGFR	CGGGTAGAGAGGGCAGTGGGAGG#CCTCCCAGTGCCTGGTGAGTGGCTTGTCTGGAAACAGTCCTGCTCC#.((((((.(((((((.(((((((#))))))).)))))........................)))))))).	3383	3429	0.846154	-29.4	1	0.00211538	0.397	3.86502	1.09534	-6.34001	20	46	8	CDS		0	0
hsa-miR-198	NM_001346897	EGFR	GGTCCAGAGGGGAGATAGGTTC#GCCGGTGGCATTTAGGGGTGACTCCTTCACACATACTCCTCCTCTGGATCC#((((((((((((((........#.)))).)))))))))).	1241	1292	0.923077	-25.7	1	0.000346758	0.529	1.65922	3.27347	-4.90607	14	17	10	CDS		0	0
hsa-miR-199a-5p	NM_001346897	EGFR	CCCAGTGTTCAGACTACCTGTTC#AGGAGGTGGCTGGTTATGTCCTCATTGCCCTCAACACAGTGGA#.(((.(((((((.((((((.((.#)).))))))))))......................))).))).	508	551	0.846154	-17.9	0	0.000689069	0.5	4.19589	3.41431	-9.20149	18	43	10	CDS		0	0
hsa-miR-208a-5p	NM_001346897	EGFR	GAGCTTTTGGCCCGGGTTATAC#AGCCTGTGGGGCCGACAGCTA#.((((.((((((((((((....#)))))...))))))).)))).	1052	1073	1	-23.2	0	0.00102874	0.353	2.25842	4.55256	-5.69428	16	21	7	CDS		0	1
hsa-miR-208a-5p	NM_001346897	EGFR	GAGCTTTTGGCCCGGGTTATAC#GCCCATGAGAAATTTACAGGGCCAAAAGTG#..(((((((((((((((.....#))))..............))))))))))).	665	695	1	-22	1	0.0283263	0.485	2.65356	2.38247	-4.957	15	30	11	CDS		0	1
hsa-miR-129-5p	NM_001346897	EGFR	CTTTTTGCGGTCTGGGCTTGC#GCCGCCCAGACCGGAC#.....(.((((((((((..((#)).)))))))))).).	116	132	0.846154	-23.1	0	0.000813629	0.191	0.249716	-0.328886	-15.2093	13	16	10	5UTR		0	0
hsa-miR-129-1-3p	NM_001346897	EGFR	AAGCCCTTACCCCAAAAAGTAT#ACTGGGATGGTGGGGGCC#..((((((((((((........#.))))...)))))))).	2067	2085	0.923077	-18.7	1	4.26e-06	0.324	3.91639	1.89606	-5.9255	12	17	8	CDS		0	0
hsa-miR-129-1-3p	NM_001346897	EGFR	AAGCCCTTACCCCAAAAAGTAT#GGGCGTAAGGAGCA#..(((((((((((.........#))).)))))).)).	3538	3552	0.846154	-17.9	1	0.0196029	0.471	-0.0852243	-0.866308	-6.78234	11	14	6	3UTR		0	0
hsa-miR-30c-5p	NM_001346897	EGFR	TGTAAACATCCTACACTCTCAGC#GCTGGGGTGCAGGAG#........((((.(((.((((((#))))))))).)))).	721	736	0.846154	-17.8	0	7.08e-05	0.456	6.62327	3.27106	-20.713	13	15	9	CDS		0	0
hsa-miR-30c-2-3p	NM_001346897	EGFR	CTGGGAGAAGGCTGTTTACTCT#GACACCTTCCTCCCAGT#(((((((((((.((((......#))))))))).)))))).	3375	3392	0.923077	-20.3	1	0.0210324	0.456	2.42065	1.25417	-7.28438	15	17	9	CDS		0	0
hsa-miR-30d-3p	NM_001346897	EGFR	CTTTCAGTCAGATGTTTGCTGC#GCAGTCTTATCTAACTATGATGCAAATAAAACCGGACTGAAGGA#(((((((((.(.(((((((...#.)))))))...)..))))))))).	618	662	1	-18.6	1	0.043204	0.588	1.50481	2.5712	-8.52688	17	24	9	CDS		0	0
hsa-miR-139-3p	NM_001346897	EGFR	TGGAGACGCGGCCCTGTTGGAGT#CCCAGGGACTGCGTCTCTT#.(((((((((((((((..((...#))))))).)))))))))).	1683	1702	0.846154	-28.4	1	1.1e-05	0.309	3.04387	3.05699	-3.79332	17	19	10	CDS		0	0
hsa-miR-10a-5p	NM_001346897	EGFR	TACCCTGTAGATCCGAATTTGTG#CACCAGAGTGATGTCTGGAGCTACGGGGTGA#((((((((((.((((........#.)))).)))))))))).	2802	2833	0.923077	-21.5	1	0.000174103	0.485	5.77339	5.74363	-6.9954	14	17	10	CDS		0	0
hsa-miR-10b-5p	NM_001346897	EGFR	TACCCTGTAGAACCGAATTTGTG#CACCAGAGTGATGTCTGGAGCTACGGGGTGA#((((((((((..(((........#.)))..)))))))))).	2802	2833	0.923077	-20.2	1	0.000174103	0.485	5.77339	5.74363	-10.3422	13	17	10	CDS		0	0
hsa-miR-34a-5p	NM_001346897	EGFR	TGGCAGTGTCTTAGCTGGTTGT#CAGCAGTGCTCCGGGCGCTGCCGT#(((((((((((.(((..((((.#))))...)))..))))))))))).	774	798	0.846154	-24.1	1	2.84e-07	0.382	2.55694	4.25877	-7.51743	18	24	11	CDS		0	0
hsa-miR-181a-5p	NM_001346897	EGFR	AACATTCAACGCTGTCGGTGAGT#GCCGACAGCTATGAGATGG#..((((((..(((((((((....#)))))))))..)))).)).	1062	1081	0.846154	-20.8	1	0.00536649	0.382	1.5045	4.67935	-7.2559	15	19	9	CDS		0	0
hsa-miR-183-5p	NM_001346897	EGFR	TATGGCACTGGTAGAATTCACT#AGTGGCGATCTCCACATCCTGCCGGTGGCATT#.(((.(((((((((........#.))))))))).))).	1221	1253	0.923077	-19.6	0	0.000183661	0.441	3.48775	3.19028	-8.88086	12	15	9	CDS		0	0
hsa-miR-183-5p	NM_001346897	EGFR	TATGGCACTGGTAGAATTCACT#TTCTACCGTGCCC#...(((((.(((((((......#)))))))))))).	3114	3127	1	-18.6	0	0.0224281	0.5	2.98524	4.8991	-7.57093	12	13	12	CDS		0	0
hsa-miR-183-5p	NM_001346897	EGFR	TATGGCACTGGTAGAATTCACT#TGAGTGCATACAGTGCCAC#..((((((((.....(((((..#))))).....)))))))).	1784	1803	0.923077	-18.6	1	0.000311911	0.456	2.54665	3.06668	-14.01	13	19	8	CDS		0	0
hsa-miR-183-3p	NM_001346897	EGFR	GTGAATTACCGAAGGGCCATAA#GTGGTCCTTGGGAATTTG#..(((((.((.(((((((((..#))))))))).))))))).	438	456	0.923077	-21	0	9.53e-05	0.603	3.85493	2.99767	-10.0954	16	18	9	CDS		0	0
hsa-miR-187-3p	NM_001346897	EGFR	TCGTGTCTTGTGTTGCAGCCGG#CCGGAATGTCAGCCGAGGCAGGGA#((.(((((((.((((((.((((#))))..)).))))))))))).)).	1703	1727	0.846154	-23.5	0	2.31e-05	0.397	1.90713	3.8277	-8.31989	19	24	11	CDS		0	0
hsa-miR-199b-5p	NM_001346897	EGFR	CCCAGTGTTTAGACTATCTGTTC#ACGGATGCACTGGGC#((((((((.......((((((..#)))))))))))))).	2002	2017	1	-17.1	1	0.00213943	0.426	2.95242	2.27965	-15.2895	14	15	14	CDS		0	0
hsa-miR-203a-5p	NM_001346897	EGFR	AGTGGTTCTTAACAGTTCAACAGTT#GGACTGAAGGAGCTGCC#.(((((((((..((((((.......#)))))).))))))))).	651	668	0.923077	-17.3	1	0.000390191	0.574	2.98478	2.33217	-9.9649	15	17	9	CDS		0	0
hsa-miR-203a-3p	NM_001346897	EGFR	GTGAAATGTTTAGGACCACTAG#CTGGTGGTGGCCCTGGGGATCGGCCTCTTCATG#(((((((.((((((((((((((#))))))))...)))))).)).......))))).	2097	2130	0.846154	-17.8	1	0.000887473	0.353	2.08459	2.90274	-6.25121	21	33	8	CDS		0	0
hsa-miR-204-5p	NM_001346897	EGFR	TTCCCTTTGTCATCCTATGCCT#AGGGTGAGCCAAGGGAGT#(((((((.((((((((......#))))))).).))))))).	1753	1771	0.942308	-18.8	1	0.00368078	0.471	4.52034	2.81975	-6.25121	15	18	7	CDS		0	0
hsa-miR-204-3p	NM_001346897	EGFR	GCTGGGAAGGCAAAGGGACGT#GCGTCTCTTGCCGGAATGTCAGCC#(((((...(((.(((((((((#))))))))))))......))))).	1693	1717	0.923077	-23.5	0	0.00060136	0.368	3.35923	3.28668	-13.0427	17	24	12	CDS		0	0
hsa-miR-205-5p	NM_001346897	EGFR	TCCTTCATTCCACCGGAGTCTG#GGGCTCCGGTGCGTTCGGCACGGTGTATAAGGGACTCTGGATCCCAGAAGGT#.((((((((((((((((((((.#)))))))))))...........................))))....))))).	2279	2331	0.923077	-23.2	1	6.24e-05	0.529	5.90663	5.45309	-3.79332	20	52	11	CDS		0	0
hsa-miR-205-5p	NM_001346897	EGFR	TCCTTCATTCCACCGGAGTCTG#CGGGCTCTGGAGGAAAAGAAA#...(((.((((.((((((((((#)))))))))).))))..))).	327	348	0.923077	-21.2	0	0.0294949	0.412	-0.302182	1.33465	-11.405	17	21	10	CDS		0	0
hsa-miR-205-5p	NM_001346897	EGFR	TCCTTCATTCCACCGGAGTCTG#CAGACTCCAACTTCTACCGTGCCCTGATGGATGAAGA#..(((((.((((.(((((((((#)))))))).................).))))))))).	3103	3140	0.846154	-19.9	0	0.00475522	0.456	3.47463	4.87729	-8.55977	18	37	9	CDS		0	0
hsa-miR-210-5p	NM_001346897	EGFR	AGCCCCTGCCCACCGCACACTG#TGCCGGTGGCATTTAGGGGTG#.(((((((.((((((((.....#))).)))))....))))))).	1240	1261	0.826923	-21.9	1	2.96e-06	0.441	1.63109	3.47894	-4.84971	15	21	7	CDS		0	0
hsa-miR-210-3p	NM_001346897	EGFR	CTGTGCGTGTGACAGCGGCTGA#CAGTGACTGCTGCCACAACCAGTGTGCTGCAGGCTGCACAGG#((((((((.((.(((((((((.#.)))).))))))).)).)))))).	809	851	0.846154	-26.5	1	1.84e-06	0.324	4.2597	4.11165	-8.34077	19	24	7	CDS		0	0
hsa-miR-211-5p	NM_001346897	EGFR	TTCCCTTTGTCATCCTTCGCCT#AGTGCAACCTTCTGGAGGGTGAGCCAAGGGAGT#(((((((.(((((((((((...#.)))))))))).).))))))).	1738	1771	1	-23	1	0.00368078	0.471	3.3884	2.69426	-6.25121	18	22	10	CDS		0	0
hsa-miR-212-5p	NM_001346897	EGFR	ACCTTGGCTCTAGACTGCTTACT#GTCTGGAGCTACGGGGTG#(((((((((((((((........#)))))))))))..)))).	2814	2832	0.923077	-21.9	1	0.000133111	0.5	6.58841	5.56838	-4.17062	15	18	11	CDS		0	0
hsa-miR-214-3p	NM_001346897	EGFR	ACAGCAGGCACAGACAGGCAGT#CTGCACAAGCTCTTTGTTGTGTCTGGTTGTTTGCTGTA#((((((((((((((((.((((.#.))))..))))))..)))))))))).	3571	3609	0.846154	-24	1	0.0262758	0.588	-0.613977	-0.478643	-3.93757	20	26	10	3UTR		0	0
hsa-miR-216a-5p	NM_001346897	EGFR	TAATCTCAGCTGGCAACTGTGA#TGACGGAATCCCTGCCAGCGAGATC#..(((((.(((((((.......#.)))))))))))).	2870	2895	1	-19.6	0	0.0022517	0.441	4.27076	5.36216	-7.50368	12	14	12	CDS		0	0
hsa-miR-216a-3p	NM_001346897	EGFR	TCACAGTGGTCTCTGGGATTAT#CCCAGTGACTGCTGC#...((((((((.(((((.....#))))).)))))))).	807	822	0.846154	-22.1	0	6.33e-05	0.324	4.68891	4.15598	-9.86134	13	15	8	CDS		0	1
hsa-miR-216a-3p	NM_001346897	EGFR	TCACAGTGGTCTCTGGGATTAT#CCCGAGGGCTGCTGG#...(((((((((.((((.....#)))).))))))))).	1659	1674	1	-19.3	0	6.27e-06	0.294	5.73635	1.92671	-7.80367	13	15	9	CDS		0	1
hsa-miR-217-5p	NM_001346897	EGFR	TACTGCATCAGGAACTGATTGGA#CCAAGCAACATGGTCAGTTTTCTCTTGCAGTC#.((((((..(((((((((((...#.))))))))).))..)))))).	1414	1446	0.846154	-19.1	1	0.0188781	0.515	4.37899	2.95461	-7.16335	17	22	9	CDS		0	0
hsa-miR-217-3p	NM_001346897	EGFR	CATCAGTTCCTAATGCATTGCC#GGTGACTGTTTGGGAGTTGATGA#(((((((((((((.((((((((#))))).)))))))))))))))).	2828	2851	0.961538	-19.8	1	0.00576748	0.5	6.39733	5.09526	-4.79441	21	23	16	CDS		0	0
hsa-miR-218-1-3p	NM_001346897	EGFR	ATGGTTCCGTCAAGCACCATGG#GGGAGCTTGTGGAGCCT#..(((((((.(((((.((....#))..)))))))))))).	2182	2199	0.923077	-22	1	4.7e-08	0.382	6.41445	4.38289	-6.43256	14	17	12	CDS		0	0
hsa-miR-218-2-3p	NM_001346897	EGFR	CATGGTTCTGTCAAGCACCGCG#CGTGGCTTGCATTGATAGAAATGG#(((..(((((((((((((((((#)))))..))).)))))))))))).	3263	3287	1	-19.9	0	0.0028566	0.515	1.53597	2.78538	-11.0886	20	24	12	CDS		0	0
hsa-miR-221-3p	NM_001346897	EGFR	AGCTACATTGTCTGCTGGGTTTC#GGAGCCCAGGGACTGCGTCTCTTGCCGGAATGTCAGCC#.((((((((((((.(((((((((#)))))))))))))...............))))).))).	1679	1717	0.923077	-21.4	1	0.00060136	0.368	2.88683	3.55933	-4.65016	21	38	13	CDS		1	0
hsa-miR-222-3p	NM_001346897	EGFR	AGCTACATCTGGCTACTGGGT#CCCAGTGCCTGGTGAGTGGCTT#(((((((((.(((.((((((.#))))))))).)))..)))))).	3386	3408	0.846154	-24.1	1	1.21e-06	0.441	3.01995	0.63421	-6.03692	18	22	9	CDS		1	0
hsa-miR-222-3p	NM_001346897	EGFR	AGCTACATCTGGCTACTGGGT#TCCAGTGTCCAAGCCAGGTGC#.....(((((((((((((((.#)))))).....))))))))).	3463	3484	0.846154	-21.3	0	0.00150609	0.397	-1.03609	-0.719496	-13.6656	15	21	9	CDS		1	0
hsa-miR-224-5p	NM_001346897	EGFR	TCAAGTCACTAGTGGTTCCGTTTAG#CTATACCCACCAGAGTGATGTCTGGAGCTACGGGGTGACTG#...(((((((.(((((((((.....#.)))))))))..))))))).	2795	2836	0.846154	-23.5	0	0.00103257	0.485	5.16892	6.30002	-9.33931	16	20	9	CDS		0	0
hsa-miR-200b-5p	NM_001346897	EGFR	CATCTTACTGGGCAGCATTGGA#TCCAAGCTGTCCCAATGGGAG#..(((((.((((((((.(((((#))))))))).)))).))))).	698	719	0.846154	-22.7	0	4.13e-05	0.412	1.93982	3.41075	-7.27064	18	21	9	CDS		0	0
hsa-miR-200b-5p	NM_001346897	EGFR	CATCTTACTGGGCAGCATTGGA#GCTGCCCATGAGAA#..(((((.((((((((......#))))))))))))).	662	676	1	-21.7	0	0.0185225	0.544	3.0139	2.31233	-7.27064	13	14	13	CDS		0	0
hsa-let-7g-3p	NM_001346897	EGFR	CTGTACAGGCCACTGCCTTGC#GCCTGGTGAGTGGCTTGTCTGGAAACAGT#(((((((((((((((((..((#))..))).))))))))))......)))).	3392	3421	0.846154	-23.5	1	0.000410449	0.412	1.23794	0.727716	-3.93757	19	29	10	CDS		0	0
hsa-let-7i-5p	NM_001346897	EGFR	TGAGGTAGTAGTTTGTGCTGTT#GACAGCATAGACGACACCTTC#.(((((.((.((((((((((((#)))))))))))).))))))).	3363	3384	1	-23.3	0	0.0396044	0.412	1.91682	2.32757	-6.57952	19	21	12	CDS		0	0
hsa-let-7i-3p	NM_001346897	EGFR	CTGCGCAAGCTACTGCCTTGCT#AGCCGAGGCAGGGAATGCGTGGA#(((((((..((.((((((((((#))).)))))))))..))))))).	1713	1736	0.846154	-25.2	1	0.000179785	0.412	2.17134	3.75441	-10.6544	19	23	9	CDS		0	0
hsa-let-7i-3p	NM_001346897	EGFR	CTGCGCAAGCTACTGCCTTGCT#GCAGGAGAGGGAGCTTGTGGAGC#((.((((((((.((..(((((.#)))))..))..)))))))).)).	2174	2197	0.846154	-23.6	0	4.14e-07	0.368	6.47593	4.20594	-9.81042	17	23	8	CDS		0	0
hsa-let-7i-3p	NM_001346897	EGFR	CTGCGCAAGCTACTGCCTTGCT#GCCTGGTGAGTGGCTTGTCTGGA#(((.(((((((((((((..((.#))..))).)))))))))).))).	3392	3415	0.846154	-22.4	0	2.77e-07	0.412	2.26938	0.654704	-6.9696	18	23	10	CDS		0	0
hsa-miR-15b-5p	NM_001346897	EGFR	TAGCAGCACATCATGGTTTACA#GTGGCAAGTCCCCCAGTGACTGCTGCCACAACCAGTGTGCTGCA#..(((((((((..(((((....#.)))))))))))))).	796	840	0.923077	-21	1	0.000813371	0.338	2.06168	4.13147	-9.59293	14	16	14	CDS		0	0
hsa-miR-23b-5p	NM_001346897	EGFR	TGGGTTCCTGGCATGCTGATTT#GCTGGGGCCCGGAGCCCAG#((((((((.(((..((......#))....))).)))))))).	1669	1688	0.923077	-22.7	1	2.95e-07	0.294	1.50165	2.32526	-7.13993	13	19	8	CDS		0	0
hsa-miR-23b-3p	NM_001346897	EGFR	ATCACATTGCCAGGGATTACCAC#GTTCAATAACTGTGAGGTGGTCCTTGGGAATTTGG#..((.(((.((((((((((((..#.)))))))))))).))).)).	422	457	1	-24.7	0	0.000192948	0.603	3.60569	2.76154	-10.1324	17	21	12	CDS		0	0
hsa-miR-23b-3p	NM_001346897	EGFR	ATCACATTGCCAGGGATTACCAC#GTGGTGGCCCTGGGGATC#.....(((.((((((.(((((((#))))))))))))).))).	2100	2118	0.923077	-23.9	0	1.74e-05	0.324	1.77131	2.93377	-14.955	16	18	13	CDS		0	0
hsa-miR-27b-5p	NM_001346897	EGFR	AGAGCTTAGCTGATTGGTGAAC#CACCGTGCAGCTCATCACGCAGCTCA#.(((((.(((((..(((((...#)))))..)))))........))))).	2477	2503	0.846154	-19.4	0	0.00139238	0.382	2.0322	5.00459	-7.48298	15	26	5	CDS		0	0
hsa-miR-27b-5p	NM_001346897	EGFR	AGAGCTTAGCTGATTGGTGAAC#ATCAAAGTGCTGGGCTCC#.(((((((((...(((((....#)))))...))))))))).	2268	2286	1	-17.9	1	0.000367068	0.515	5.1918	5.56343	-11.254	14	18	9	CDS		0	0
hsa-miR-125b-1-3p	NM_001346897	EGFR	ACGGGTTAGGCTCTTGGGAGCT#GGCTGTCCAACGAATGGGCCTAAGATCCCGTC#((((((((((((((((((((((#)))).))))).....))))))))...))))).	2028	2060	0.846154	-25.5	1	1.61e-05	0.382	1.2243	3.10492	-3.93757	22	32	8	CDS		0	0
hsa-miR-130a-3p	NM_001346897	EGFR	CAGTGCAATGTTAAAAGGGCAT#TGCACCTACGGATGCACTGG#(((((((.(((....((((((.#))).))))))..))))))).	1995	2015	0.846154	-18.1	1	0.000270634	0.426	1.57361	2.19273	-12.4794	16	20	7	CDS		0	0
hsa-miR-132-5p	NM_001346897	EGFR	ACCGTGGCTTTCGATTGTTACT#GTCTGGAGCTACGGG#.((((((((((.(((.......#))).)))))))))).	2814	2829	1	-18	1	0.000155263	0.5	7.44923	5.48084	-7.37318	13	15	10	CDS		0	0
hsa-miR-132-3p	NM_001346897	EGFR	TAACAGTCTACAGCCATGGTCG#GGCCAGGTCTTGAAGGCTGTC#..(((((((.(((((.(((((.#))))))))..)).))))))).	2014	2035	1	-20.9	1	0.000362551	0.412	4.80968	2.99429	-6.43256	17	21	8	CDS	MIRT731713	0	0
hsa-miR-132-3p	NM_001346897	EGFR	TAACAGTCTACAGCCATGGTCG#ACCGTGGCTTGCATTGATAGAAATGGGCTGC#...(((((((((((((((((..#))))))))).)............))))))).	3261	3292	0.846154	-19.8	0	0.0124314	0.515	1.68626	2.94046	-6.51454	17	31	9	CDS	MIRT731713	0	0
hsa-miR-133a-3p	NM_001346897	EGFR	TTTGGTCCCCTTCAACCAGCTG#GCTGGTGGTGGCCCTGGGGATCGGC#.(((((((((.(((((((((..#))))))..)))....))))))))).	2096	2121	0.846154	-22.8	1	1.02e-06	0.338	2.10417	2.87136	-6.6181	18	25	9	CDS	MIRT007032	0	1
hsa-miR-133a-3p	NM_001346897	EGFR	TTTGGTCCCCTTCAACCAGCTG#GACGGGGACCAGAC#((((((((((.((.........#)).)))))))))).	1843	1857	1	-20.6	1	0.000179642	0.456	3.82	3.2181	-8.58769	12	14	10	CDS	MIRT007032	0	1
hsa-miR-135a-3p	NM_001346897	EGFR	TATAGGGATTGGAGCCGTGGCG#CGTCACGGACTCCCCTCCTG#....((((..((((((((((((#)))))))).))))..)))).	3211	3231	0.846154	-25.6	0	0.000687785	0.426	3.29045	3.6425	-11.8455	16	20	8	CDS		0	0
hsa-miR-135a-2-3p	NM_001346897	EGFR	ATGTAGGGATGGAAGCCATGAA#CGTGGCTTGCATTGATAGAAATGGGCTGCAA#.(((((.((((.((((((((..#)))))))).))))............))))).	3263	3294	0.846154	-19	0	0.0125963	0.529	0.746929	2.67138	-8.68381	17	31	8	CDS		0	0
hsa-miR-137-5p	NM_001346897	EGFR	ACGGGTATTCTTGGGTGGATAAT#TTGTGGAGAACTCTGAGTGCATACAGTGCCACCCAGAGTGCCTGC#.(((((((((.(((((((.....#.)))))))))))))))).	1771	1816	1	-27.6	1	4.53e-06	0.441	1.50946	3.40769	-6.6181	16	18	16	CDS		0	0
hsa-miR-137-5p	NM_001346897	EGFR	ACGGGTATTCTTGGGTGGATAAT#GTCCGCCCGAGTCCCCGC#.((((....(((((((((((...#)))))))))))..)))).	151	169	0.923077	-26	0	0.0032307	0.25	-0.483449	-0.100783	-10.608	15	18	11	5UTR		0	0
hsa-miR-138-5p	NM_001346897	EGFR	AGCTGGTGTTGTGAATCAGGCCG#TGGTCTGGAAGTACGCAGACGCCGGCC#.((((((((((((..((((((((#)))))))).....))))).))))))).	1942	1969	1	-25.6	1	3.2e-06	0.426	1.90562	3.0735	-5.38561	20	27	8	CDS		1	0
hsa-miR-138-5p	NM_001346897	EGFR	AGCTGGTGTTGTGAATCAGGCCG#CGGCCGGAGTCCCGAGCTAGCC#.((((((.(((.((.((.(((((#))))).)).)).))))))))).	82	104	0.846154	-21.7	1	0.00861685	0.147	-0.500982	-0.213165	-10.1892	18	22	9	5UTR		1	0
hsa-miR-138-5p	NM_001346897	EGFR	AGCTGGTGTTGTGAATCAGGCCG#TGGCCTGAAAACAGGACGGACCTCCATGCC#.(((((((((.((..((((((((#))))))))...)).)))).....))).)).	1353	1383	0.846154	-21.4	1	0.00712254	0.485	2.62854	4.4986	-8.21039	19	30	8	CDS		1	0
hsa-miR-138-2-3p	NM_001346897	EGFR	GCTATTTCACGACACCAGGGTT#CTGGTGTGTGCAGATCGCA#((.(((((((.(((((((....#)))))))))).)))).)).	2573	2592	0.846154	-19.3	0	0.000455692	0.426	6.72323	5.18218	-8.31989	16	19	10	CDS		0	0
hsa-miR-140-3p	NM_001346897	EGFR	TACCACAGGGTAGAACCACGG#TGGTGGTGGCCCTGGGG#..((.((((((...(((((.(#).))))).)))))))).	2098	2115	0.846154	-20.6	0	9.37e-06	0.324	1.99321	2.96045	-14.5688	14	17	8	CDS		0	0
hsa-miR-143-5p	NM_001346897	EGFR	GGTGCAGTGCTGCATCTCTGGT#GCCGGAGCGAGCTCTTCGGGGAGCAGCGATGCGACCC#((((((.((((((.(((((((.#.))))))))))))).))).))).	233	270	1	-25.9	0	0.000135018	0.235	-0.503102	-0.141953	-6.3381	19	23	13	5UTR		0	0
hsa-miR-143-5p	NM_001346897	EGFR	GGTGCAGTGCTGCATCTCTGGT#ACCAGTGTGCTGCAGGCTGCACA#.(((((((.(((((.(.(((((#))))).)...)))))))))))).	826	849	0.846154	-25.4	1	6.62e-06	0.338	6.89571	4.04417	-5.58516	18	23	12	CDS		0	0
hsa-miR-145-5p	NM_001346897	EGFR	GTCCAGTTTTCCCAGGAATCCCT#AGGTGGTCCTTGGGAATTTGGAA#.(((((..((((((((.((((((#))).))).)))))))).))))).	436	459	0.846154	-22.4	0	0.00199281	0.618	3.75933	3.04619	-7.65065	19	23	8	CDS	MIRT003325	0	0
hsa-miR-153-3p	NM_001346897	EGFR	TTGCATAGTCACAAAAGTGATC#TCAGGAAACAAAAATTTGTGCTATGCAAA#((((((((.((((((.......#.)))))))))))))).	1515	1544	1	-17.3	1	0.00668768	0.706	3.3791	3.22719	-5.22701	14	16	14	CDS		0	0
hsa-miR-191-5p	NM_001346897	EGFR	CAACGGAATCCCAAAAGCAGCTG#AGCTGCTGGGGTGCAGG#...(...(((((...(((((((.#))))))))))))...).	717	734	1	-18	0	1.12e-05	0.456	3.38404	3.25867	-16.9596	13	17	12	CDS		0	0
hsa-miR-191-3p	NM_001346897	EGFR	GCTGCGCTTGGATTTCGTCCCC#GGGACGGCCGGGGCAGCG#(((((.(((((...(((((((.#))))))))))))))))).	273	291	0.846154	-27.6	0	1.69e-07	0.221	-0.821016	-0.246546	-11.3313	17	18	17	CDS		0	0
hsa-miR-9-5p	NM_001346897	EGFR	TCTTTGGTTATCTAGCTGTATGA#CAAACTGCTGGGTGCGGAAGAG#(((((.(.((((((((.((.((.#)).)).))))))))).))))).	2702	2724	0.871795	-18.6	0	0.000530317	0.5	3.54651	5.72664	-8.15217	18	22	9	CDS		0	0
hsa-miR-125a-5p	NM_001346897	EGFR	TCCCTGAGACCCTTTAACCTGTGA#CACAGGAACTGGATATTCTGAAAACCGTAAAGGAAATCACAGGGT#.(((((.((.((((((.((((((.#)))))).....................))))))...)).))))).	1291	1336	0.846154	-20.2	0	0.00161557	0.588	2.76784	3.31192	-6.57952	19	45	6	CDS	MIRT054888	0	0
hsa-miR-127-5p	NM_001346897	EGFR	CTGAAGCTCAGAGGGCTCTGAT#GTCACGGACTCCCCTCCTGAGCTCTCTGAGTGCAACCAGC#(((..(((((((((((((.((.#.))..))))))))))))).....))).	3212	3252	1	-25.3	0	0.000531762	0.456	3.10101	3.56136	-11.0886	18	27	13	CDS		0	0
hsa-miR-127-3p	NM_001346897	EGFR	TCGGATCCGTCTGAGCTTGGCT#CCAAGCTCTCTTGAGGATCTTGAA#((((((((....((((((((..#))))))))......)))))).)).	2225	2249	0.846154	-22.1	1	8.22e-05	0.574	5.23254	5.19906	-12.408	16	24	8	CDS		0	0
hsa-miR-129-2-3p	NM_001346897	EGFR	AAGCCCTTACCCCAAAAAGCAT#TGGGATGGTGGGGGCC#..((((((((((((........#))))...)))))))).	2069	2085	0.923077	-18.5	1	4.26e-06	0.324	3.73147	1.90869	-5.9255	12	16	8	CDS		0	0
hsa-miR-129-2-3p	NM_001346897	EGFR	AAGCCCTTACCCCAAAAAGCAT#GGGCGTAAGGAGCA#..(((((((((((.........#))).)))))).)).	3538	3552	0.846154	-17.9	1	0.0196029	0.471	-0.0852243	-0.866308	-6.78234	11	14	6	3UTR		0	0
hsa-miR-134-5p	NM_001346897	EGFR	TGTGACTGGTTGACCAGAGGGG#CCCCTCCTGAGCTCTCTGAGTGCAACCAGCAACAA#(((..((((((((((((((((.#.))))))).)).)))))))..))).	3222	3257	0.846154	-26.4	0	0.00369191	0.485	3.34122	3.2542	-11.0886	19	25	7	CDS		0	1
hsa-miR-134-3p	NM_001346897	EGFR	CCTGTGGGCCACCTAGTCACCAA#TGGTGGTGGCCCTGGGGA#(((..((((((((.....((((.#))))))))))))..))).	2098	2116	0.923077	-25.5	0	1.2e-05	0.324	2.06256	3.06629	-12.914	15	18	12	CDS		0	0
hsa-miR-136-5p	NM_001346897	EGFR	ACTCCATTTGTTTTGATGATGGA#TCCCTCAAGGAGATAAGTGATGGAGA#.(((((((((((((..(((.(((#))).)))..))))))...))))))).	1479	1505	0.846154	-17.7	1	0.0117087	0.618	5.14679	2.33092	-4.76182	19	26	7	CDS		0	0
hsa-miR-149-5p	NM_001346897	EGFR	TCTGGCTCCGTGTCTTCACTCCC#GGGGTGCAGGAGAGGAGAACTGCCAGAA#(((((((((.(.((((((((((.#)))))).)))).).).))...)))))).	724	752	0.846154	-25.5	1	0.00782244	0.441	4.73508	3.60345	-8.52688	20	28	6	CDS		0	1
hsa-miR-149-5p	NM_001346897	EGFR	TCTGGCTCCGTGTCTTCACTCCC#GGGCTGCTGGGGCCCGGAGCCCAGGG#((((((((((.(((((..(.(((#)))..)..))))).))))))).))).	1664	1690	0.846154	-24.2	1	1.64e-06	0.294	1.47928	2.28096	-6.76235	19	26	7	CDS		0	1
hsa-miR-149-3p	NM_001346897	EGFR	AGGGAGGGACGGGGGCTGTGC#GCAGCAGCCTCCGCCCCCCG#.(((.(((.((((((((((((#))).))))))))))))))).	33	53	0.923077	-33.7	0	1.03e-05	0.147	-0.00911357	-0.0793031	-8.96875	18	20	15	5UTR		0	0
hsa-miR-149-3p	NM_001346897	EGFR	AGGGAGGGACGGGGGCTGTGC#GCACGGCCCCCTGACTCCGTCCA#..(((.(((.(((((((((((#)))))))))))....))).))).	195	218	0.923077	-33.4	0	0.0140267	0.324	0.0182759	-0.361154	-8.10047	17	23	11	5UTR		0	0
hsa-miR-150-5p	NM_001346897	EGFR	TCTCCCAACCCTTGTACCAGTG#GGTGAGCCAAGGGAGTTTGTGGAGAA#((((((((((((((((((....#))))...))))))...))).))))).	1755	1781	0.923077	-21.4	1	0.00594951	0.456	3.11496	2.97119	-3.93757	18	26	6	CDS		0	0
hsa-miR-154-5p	NM_001346897	EGFR	TAGGTTATCCGTGTTGCCTTCG#CGGTGGCATTTAGGGGTGACTC#..((((((((.((.((((.(((#))).))))..)).)))))))).	1243	1265	0.846154	-19.9	1	0.000831079	0.441	4.72346	3.03649	-8.63862	17	22	8	CDS		0	0
hsa-miR-185-5p	NM_001346897	EGFR	TGGAGAGAAAGGCAGTTCCTGA#CAGGGACTGCGTCTCTTGCCGG#(((.((((.(.((((((((((.#)))))))))).).)))).))).	1685	1707	0.942308	-26.4	0	0.00147674	0.324	3.69028	2.91425	-10.8508	18	22	10	CDS		0	0
hsa-miR-185-3p	NM_001346897	EGFR	AGGGGCTGGCTTTCCTCTGGTC#GGCCGGAGTCCCGAGCTAGCCCCG#.(((((((((((..((((((((#))))))))....))))))))))).	83	107	0.846154	-34	1	0.000105319	0.176	-0.499634	-0.254335	-5.9393	19	24	11	5UTR		0	0
hsa-miR-188-5p	NM_001346897	EGFR	CATCCCTTGCATGGTGGAGGG#CCTCCACCGTGCAGC#......((((((((((((((.#)))))))))))))).	2473	2488	0.897436	-27.1	0	0.00294467	0.324	4.71496	5.03443	-15.5666	14	15	14	CDS		0	0
hsa-miR-188-5p	NM_001346897	EGFR	CATCCCTTGCATGGTGGAGGG#CTTCTACCGTGCCCTGATGGATGA#(((((.((((((((((((((.#))))))))))))...)).))))).	3113	3137	0.961538	-25.6	0	0.00120616	0.456	3.38765	4.86449	-5.83853	19	24	12	CDS		0	0
hsa-miR-188-5p	NM_001346897	EGFR	CATCCCTTGCATGGTGGAGGG#CCTCCATCAGTGGCGATCTCCACATCCTGCCGGTGGCATTTAGGGGTGA#((((((((((.(((((((((.#)))))))))...)))..........................))))))).	1213	1262	0.923077	-25.1	1	6.92e-06	0.441	2.69253	3.45177	-6.76235	19	49	9	CDS		0	0
hsa-miR-193a-5p	NM_001346897	EGFR	TGGGTCTTTGCGGGCGAGATGA#TCATCTGTGCCCAGCAGTGCTCCGG#((((.(.(((((((((((((((#)))))).))))).)))).).)))).	763	788	0.923077	-23.3	0	1.97e-05	0.397	4.38179	3.68051	-9.6003	20	25	6	CDS		0	0
hsa-miR-193a-3p	NM_001346897	EGFR	AACTGGCCTACAAAGTCCCAGT#ACTGGGATGGTGGGGGCCC#....(((((.((..((((((((#))))))))..)).))))).	2067	2086	0.846154	-25.1	0	4.71e-06	0.324	3.2553	1.99677	-12.935	15	19	8	CDS		0	0
hsa-miR-320a-5p	NM_001346897	EGFR	GCCTTCTCTTCCCGGTTCTTCC#GGGAGCTGCTGGGGTGCAGGAGAGGA#..((((((((((((((.(((((#)))))..)))))))....))))))).	714	740	0.923077	-24.6	1	0.000656959	0.471	3.71857	3.42408	-4.957	19	26	7	CDS		0	0
hsa-miR-320a-3p	NM_001346897	EGFR	AAAAGCTGGGTTGAGAGGGCGA#CGCTCCTGGCGCTGCTGGCTGCGCTCTGCCCGGCG#....(((((((..((((.(((.#.))).))))))))))).	289	324	0.923077	-23.6	0	1.48e-06	0.338	0.374338	0.46921	-14.1825	14	17	11	CDS		0	0
hsa-miR-320a-3p	NM_001346897	EGFR	AAAAGCTGGGTTGAGAGGGCGA#TCGACCCACTCAGCAGCAGCC#....((((.((((((.((((((#))).))).))))))..)))).	3438	3459	0.884615	-22.7	0	0.0317318	0.368	-1.05366	0.141061	-10.836	16	21	6	CDS		0	0
hsa-miR-200c-5p	NM_001346897	EGFR	CGTCTTACCCAGCAGTGTTTGG#CCAAACTGCTGGGTGCGGAA#..((((((((((((((..((((#))))))))))))))).))).	2701	2721	1	-23.7	1	0.00021355	0.5	3.34819	5.74376	-4.957	18	20	15	CDS		0	0
hsa-miR-200c-5p	NM_001346897	EGFR	CGTCTTACCCAGCAGTGTTTGG#CCAAGCTGTCCCAATGGGAGCTGCTGGGGTGCAGGAGAGGA#(.((((.(((((((((((((((#)))))).............)))))))))......)))).).	699	740	0.846154	-23	0	0.000656959	0.471	3.14918	3.20137	-6.64494	20	41	9	CDS		0	0
hsa-miR-200c-5p	NM_001346897	EGFR	CGTCTTACCCAGCAGTGTTTGG#CCTGGCGCTGCTGGCTGCGCTCTGCCCGGCGAGTCGGGCT#.((((.(((((((((((((.((#)).)))))))))))..................)).)))).	293	333	0.923077	-22.4	0	8.59e-08	0.353	-0.139656	1.37302	-5.69428	19	40	11	CDS		0	0
hsa-miR-200c-3p	NM_001346897	EGFR	TAATACTGCCGGGTAATGATGGA#TGCGTCAAGACCTGCCCGGCAGG#.....((((((((((.(((((.(#).))))).....)))))))))).	1896	1919	0.846154	-23.3	0	1.63e-05	0.397	3.06061	3.31228	-13.8986	16	23	10	CDS		0	0
hsa-miR-200c-3p	NM_001346897	EGFR	TAATACTGCCGGGTAATGATGGA#TCATCTGTGCCCAGCAGTGC#...((((((.(((((..(((((.#)))))..))))).)))))).	763	783	0.846154	-23.2	0	1.53e-05	0.382	5.78395	3.76458	-7.9901	16	20	6	CDS		0	0
hsa-miR-1-5p	NM_001346897	EGFR	ACATACTTCTTTATATGCCCAT#GGGCAAATACAGCTTTGGTGCCACCTGCGTGAAGAAGTGTC#..((((((((((((.(((((..#))))).......................)))))))))))).	971	1012	0.846154	-18.6	1	0.0046419	0.485	3.88467	4.59533	-5.69245	17	41	12	CDS	MIRT734955	0	0
hsa-miR-155-5p	NM_001346897	EGFR	TTAATGCTAATCGTGATAGGGGTT#TGCCTATCAAGTGGATGGCATTGGA#(((((((((.((((((((((.(..#).)))))))..))).))))))))).	2752	2777	0.846154	-19.3	1	0.000299528	0.574	5.85676	4.96609	-5.18008	20	25	9	CDS	MIRT020911	0	0
hsa-miR-128-2-5p	NM_001346897	EGFR	GGGGGCCGATACACTGTACGAGA#TGTATCCAGTGTGCCCACTACATTGACGGCCCCCA#((((((((.(((((((((((...#))))..))))))).............)))))))).	1860	1895	0.923077	-26.9	1	0.00747096	0.397	2.90388	3.27209	-4.99396	19	35	8	CDS		0	0
hsa-miR-106b-5p	NM_001346897	EGFR	TAAAGTGCTGACAGTGCAGAT#TCTTGCAGTCGTCAGCCTG#...((.(((((((.((((((.#))).))).).)))))))).	1436	1455	0.846154	-17.7	0	0.00646879	0.529	1.45951	3.92467	-9.27234	15	19	8	CDS		1	0
hsa-miR-106b-3p	NM_001346897	EGFR	CCGCACTGTGGGTACTTGCTGC#GCAGCGATACAGCTCAGACCCCACAGGCGC#.(((.(((((((..((((((((#)))))).........))..)))))))))).	3323	3353	0.923077	-24.5	0	0.0105466	0.426	3.57999	1.94201	-10.0583	18	30	10	CDS		0	0
hsa-miR-30c-1-3p	NM_001346897	EGFR	CTGGGAGAGGGTTGTTTACTCC#GGACAGCATAGACGACACCTTCCTCCCAGT#((((((((((((((((((....#.)))))))).)))..))))))).	3362	3392	0.923077	-23.8	1	0.0210324	0.456	2.06443	1.92408	-3.93757	18	23	8	CDS		0	0
hsa-miR-200a-5p	NM_001346897	EGFR	CATCTTACCGGACAGTGCTGGA#TCCAGTATTGATCGGGAGAG#..((((.((((.((((((((((#)))))))))).)))))))).	214	234	0.923077	-22	0	0.000196638	0.338	-0.222067	-0.144178	-9.84749	18	20	10	5UTR		0	0
hsa-miR-219a-2-3p	NM_001346897	EGFR	AGAATTGTGGCTGGACATCTGT#GCAGCCAGTCTCCAGTGTCCAAGCCAGGT#.....(.((((((((((.(((.#.))))))))).)))).).	3453	3482	0.923077	-19.5	0	0.0197837	0.382	-0.398899	-0.797843	-15.2093	14	18	9	CDS		0	0
hsa-miR-34c-5p	NM_001346897	EGFR	AGGCAGTGTAGTTAGCTGATTGC#GCTGGCTGCGCTCTGCCC#.(((((((((((((((.......#))))))))))))..))).	302	320	0.846154	-22.6	1	9.49e-06	0.294	0.0130394	1.10975	-3.79332	15	18	12	CDS		0	0
hsa-miR-34c-5p	NM_001346897	EGFR	AGGCAGTGTAGTTAGCTGATTGC#GCAGTCTTATCTAACTATGATGCAAATAAAACCGGACTGAAGGAGCTGCCC#.((((((((((((((..((((((#))))))....))))))))..........................)))))).	618	669	0.846154	-22	1	0.000345841	0.574	1.99334	2.9644	-4.02637	20	51	8	CDS		0	0
hsa-miR-299-5p	NM_001346897	EGFR	TGGTTTACCGTCCCACATACAT#GGAGGGTGAGCCAA#(((((((((.(((.........#))).))))))))).	1751	1765	1	-20.4	1	0.000521374	0.485	4.69509	2.88572	-7.00542	12	14	9	CDS		0	0
hsa-miR-299-5p	NM_001346897	EGFR	TGGTTTACCGTCCCACATACAT#TGGGATGGTGGGGGCCC#.((((((((((((((.......#)))))))))))..))).	2069	2086	0.923077	-19.6	1	4.71e-06	0.324	3.8378	1.8576	-4.02637	14	17	11	CDS		0	0
hsa-miR-299-3p	NM_001346897	EGFR	TATGTGGGATGGTAAACCGCTT#AGCGTGGACAACCCCCACGTGT#((((((((..(((...(((((.#)))).)....))))))))))).	2427	2449	0.846154	-18	1	0.000369483	0.338	5.35439	5.67437	-8.06181	16	22	11	CDS		0	0
hsa-miR-99b-5p	NM_001346897	EGFR	CACCCGTAGAACCGACCTTGCG#TGTGAGGTGGTCCTTGGGA#..((((.((.(((.((((((((#))))))))))).)))))).	432	451	0.846154	-19.2	0	4.68e-06	0.574	3.83615	3.05005	-8.60003	17	19	11	CDS		0	0
hsa-miR-99b-3p	NM_001346897	EGFR	CAAGCTCGTGTCTGTGGGTCCG#GACCCCACAGGCGCCTTGA#((((...(((((((((((((..#))))).)))))))))))).	3339	3358	1	-23.5	0	0.0174226	0.426	2.90617	2.47871	-11.5013	17	19	12	CDS		0	0
hsa-miR-296-5p	NM_001346897	EGFR	AGGGCCCCCCCTCAATCCTGT#GCCTAAGATCCCGTCCATCGCCACTGGGATGGTGGGGGCCCTC#(((((((((((...(((((..#.))))))).))))))))).	2045	2088	1	-29.1	1	7.57e-08	0.338	1.79905	2.49621	-9.43035	16	19	9	CDS		0	0
hsa-miR-296-3p	NM_001346897	EGFR	GAGGGTTGGGTGGAGGCTCTCC#GGAGAACGCCTCCCTCAGCCACCC#(..(((((((.(((((((((((#)))))..)))))))))))))..).	2913	2937	0.815385	-30.7	0	0.0255432	0.5	4.72176	5.48368	-9.48356	19	24	13	CDS		0	0
hsa-miR-296-3p	NM_001346897	EGFR	GAGGGTTGGGTGGAGGCTCTCC#AGCAGCCTCCGCCCCCCGCA#(.(((..(((((((((((((..#)).)))))))))))))).).	35	55	0.846154	-28.9	0	3.91e-05	0.147	-0.000799257	-0.000862792	-8.5459	17	20	14	5UTR		0	0
hsa-miR-130b-5p	NM_001346897	EGFR	ACTCTTTCCCTGTTGCACTAC#GGCTGCTGCAGGAGAGGGAGC#.((((((((((((.(((((..#)).))).))))).))))))).	2167	2188	0.846154	-21.7	1	0.00111238	0.368	4.85609	3.92857	-4.65016	17	21	7	CDS		0	0
hsa-miR-26a-2-3p	NM_001346897	EGFR	CCTATTCTTGATTACTTGTTTC#GAGATAAGTGATGGAGAT#.....((((.((((((((((((#)))))))))))).)))).	1488	1506	0.923077	-18	0	0.0486374	0.618	5.34013	2.3033	-14.9081	16	18	12	CDS		0	0
hsa-miR-361-5p	NM_001346897	EGFR	TTATCAGAATCTCCAGGGGTAC#GTGGCCCTGGGGATC#........((((((((((.(((#))).)))))))))).	2103	2118	0.923077	-21.9	0	1.74e-05	0.324	1.72693	3.04319	-19.4239	13	15	10	CDS		0	0
hsa-miR-363-5p	NM_001346897	EGFR	CGGGTGGATCACGATGCAATTT#TGCGTCAAGACCTGCCCGG#(((((((.((..((((((....#))))))..)).))))))).	1896	1915	0.923077	-21.1	1	0.00021364	0.412	5.30956	3.25163	-12.4228	15	19	7	CDS		0	0
hsa-miR-363-3p	NM_001346897	EGFR	AATTGCACGGTATCCATCTGTA#ACATGGACGACGTGGTGGATGCCGA#.......((((((((((((((.#.))).))))))))))).	3142	3167	0.846154	-20.5	0	0.000207749	0.441	3.55988	4.30725	-17.1102	14	17	11	CDS		0	0
hsa-miR-365a-5p	NM_001346897	EGFR	AGGGACTTTTGGGGGCAGATGTG#TACAGTGCCACCCAGAGTGCCTG#(((.((.((((((((((..((((#)))).)))).)))))))).))).	1792	1815	0.923077	-24.5	0	3.34e-05	0.426	4.00227	2.82521	-8.51328	19	23	8	CDS		0	0
hsa-miR-365b-5p	NM_001346897	EGFR	AGGGACTTTCAGGGGCAGCTGT#CGGCTGCCTCCTGGACTATGTCCG#..((((.((((((((((((((.#)))))))).))))))....)))).	2510	2534	0.846154	-29.1	0	7.03e-06	0.441	4.81726	4.87197	-6.50069	18	24	8	CDS		0	0
hsa-miR-365b-5p	NM_001346897	EGFR	AGGGACTTTCAGGGGCAGCTGT#GCGCTGCCGTGGCAAGTCCCC#.((((((((((..((((((.((#)))))))).))).))))))).	788	809	0.807692	-25.2	1	5.58e-05	0.324	1.72735	4.39924	-8.42926	18	21	8	CDS		0	0
hsa-miR-302c-5p	NM_001346897	EGFR	TTTAACATGGGGGTACCTGCTG#CAGGACGGACCTCCATGC#.....(((((((((.(((.(((#))).).))))))))))).	1364	1382	1	-20.5	0	0.000541464	0.485	2.7513	4.59686	-14.401	15	18	11	CDS		0	0
hsa-miR-302d-3p	NM_001346897	EGFR	TAAGTGCTTCCATGTTTGAGTGT#GCTCACGCAGTTGGGCACTTT#.((((((((...(((.(((((..#))))).)))...)))))))).	371	392	0.923077	-18.8	1	0.00158938	0.5	2.2759	2.91473	-11.4405	16	21	8	CDS		1	1
hsa-miR-367-3p	NM_001346897	EGFR	AATTGCACTTTAGCAATGGTGA#TCCCAATGGGAGCTGCTGGGGTGCAGG#..(((((((((((((.......#.))))))))))))).	707	734	1	-18.6	1	1.12e-05	0.456	2.44935	3.19561	-5.19005	13	15	13	CDS		0	0
hsa-miR-376c-5p	NM_001346897	EGFR	GGTGGATATTCCTTCTATGTT#GCGTGAAGAAGTGTCCCCG#((.(((((((.((((.((((.#)))))))).))))))))).	997	1016	0.846154	-17.9	0	0.0055645	0.485	4.20916	4.65152	-8.55294	17	19	9	CDS		0	0
hsa-miR-369-3p	NM_001346897	EGFR	AATAATACATGGTTGATCTTT#CGGCCATGTGTG#....(((((((((((......#))))))))))).	1964	1976	0.846154	-15.2	0	9.43e-05	0.382	0.253451	3.42238	-9.77961	11	12	11	CDS		0	0
hsa-miR-370-5p	NM_001346897	EGFR	CAGGTCACGTCTCTGCAGTTAC#GTGACTGTTTGGGAGTTGATGACCTT#.((((((((.((((((((((((#))))))))...)))).)).)))))).	2829	2855	0.923077	-22.2	1	0.00856336	0.471	6.25293	5.08746	-5.03583	20	26	8	CDS		0	0
hsa-miR-370-5p	NM_001346897	EGFR	CAGGTCACGTCTCTGCAGTTAC#CTGCACAGGACGGGGACCA#..((((.(((((.(((((....#)))))..)))))..)))).	1835	1854	0.846154	-19.9	0	0.00018739	0.441	5.88256	3.08862	-7.78982	14	19	5	CDS		0	0
hsa-miR-371a-5p	NM_001346897	EGFR	ACTCAAACTGTGGGGGCACT#AGTGCCACCCAGAGTG#......(((.((((((((((#)))))).)))).))).	1795	1811	0.846154	-22.3	0	0.004772	0.441	3.7109	2.8452	-16.8091	13	16	6	CDS		0	0
hsa-miR-371a-5p	NM_001346897	EGFR	ACTCAAACTGTGGGGGCACT#TGCCCTCAACACAGTGGAGC#.(((..((((((((((((..#))))))...)))))).))).	533	553	0.846154	-20.8	0	0.00284682	0.515	3.62003	3.94408	-9.81332	15	20	6	CDS		0	0
hsa-miR-371a-3p	NM_001346897	EGFR	AAGTGCCGCCATCTTTTGAGTGT#CATGCAGAAGGAGGCAAAGTGCCTATCAAGTGGATGGCATTG#.(((((((((.(((((((.(((.#))).))))))).)))....................)))))).	2733	2775	0.846154	-19.3	1	0.000209061	0.574	6.39835	5.22904	-6.6181	19	42	7	CDS		0	0
hsa-miR-372-3p	NM_001346897	EGFR	AAAGTGCTGCGACATTTGAGCGT#GCTCACGCAGTTGGGCACTTTT#((((((((.((((...(((((..#)))))....)))))))))))).	371	393	0.923077	-20.1	1	0.000851296	0.515	1.78642	2.91703	-6.8193	17	22	12	CDS		1	0
hsa-miR-373-5p	NM_001346897	EGFR	ACTCAAAATGGGGGCGCTTTCC#GAAGTGTCCCCGTA#.......(((((((((((((..#))))))))))))).	1004	1018	0.923077	-20.9	0	0.0199513	0.456	4.44719	4.29915	-17.1102	13	14	13	CDS		0	0
hsa-miR-373-5p	NM_001346897	EGFR	ACTCAAAATGGGGGCGCTTTCC#AGTGCCACCCAGAGTG#((((....((((((((((....#)))))).)))))))).	1795	1811	0.846154	-19.2	0	0.004772	0.441	3.7109	2.8452	-13.8149	14	16	8	CDS		0	0
hsa-miR-373-3p	NM_001346897	EGFR	GAAGTGCTTCGATTTTGGGGTGT#ATTCCGAGACGAAGCCACG#...((((((((.(((((((((..#))))))))))))))).)).	884	903	0.846154	-18.9	0	0.0119754	0.382	3.89982	4.02222	-9.86134	17	19	15	CDS		1	0
hsa-miR-375-5p	NM_001346897	EGFR	GCGACGAGCCCCTCGCACAAACC#GTAAGAAGTGCGAAGGGCCTTGCCGCA#(((.(((((((.((((((.....#.)))))).)))).))).))).	1102	1129	0.846154	-26.7	0	3.45e-05	0.485	4.24378	3.50006	-10.3164	16	21	6	CDS		0	0
hsa-miR-375-5p	NM_001346897	EGFR	GCGACGAGCCCCTCGCACAAACC#TGGTGAGTGGCTTGTCT#..((((((((.(((((.((....#))))))).)))))))).	3395	3412	1	-23.1	1	3.83e-08	0.412	0.247376	0.673918	-7.78178	15	17	8	CDS		0	0
hsa-miR-375-3p	NM_001346897	EGFR	TTTGTTCGTTCGGCTCGCGTGA#CACGGCCCCCTGACTCCGTCCAGTATTGATCGGGAGAGCCGGAGCGAGCT#...(((((((((((((.(.(((#.))).).)))))).))))))).	196	246	0.846154	-25.4	0	1.2e-05	0.338	-0.21698	-0.2688	-6.51454	17	22	7	5UTR		0	0
hsa-miR-377-5p	NM_001346897	EGFR	AGAGGTTGCCCTTGGTGAATTC#CATCAGTGGCGATCTCC#.(((((((((.((((((.....#)))))).))))))))).	1217	1234	1	-21.3	1	0.000809999	0.471	3.86752	3.18008	-6.6181	15	17	9	CDS		0	0
hsa-miR-378a-5p	NM_001346897	EGFR	CTCCTGACTCCAGGTCCTGTGT#GCACCGCGACCTGGCAGCCAGGAA#.(((((.((((((((((.((((#)))).).))))))).)).))))).	2627	2651	0.884615	-27.2	0	4.7e-06	0.382	4.79466	5.6952	-5.33701	19	24	7	CDS		0	0
hsa-miR-378a-3p	NM_001346897	EGFR	ACTGGACTTGGAGTCAGAAGGC#GCCAACGCCACAACCACCGCGCACGGCCCCCTGACTCCGTCCAGTA#(((((((..((((((((..(((#.)))..))))))))))))))).	175	221	0.923077	-29.8	1	0.0102711	0.338	-0.282153	-0.284378	-7.3076	18	22	15	5UTR		0	0
hsa-miR-381-5p	NM_001346897	EGFR	AGCGAGGTTGCCCTTTGTATAT#GTGTGCAGATCGCAAAGGGCATGAACTACTTGGAGGACCGTCGCTT#((((((((((((((((((....#.))))))))))...............))).))))).	2578	2624	0.846154	-24.1	1	0.00035291	0.382	6.18422	4.61344	-3.93757	18	36	10	CDS		0	0
hsa-miR-381-5p	NM_001346897	EGFR	AGCGAGGTTGCCCTTTGTATAT#GTGCGAAGGGCCTTGCC#.(((((...(((((((((((..#)))))))))))))))).	1109	1126	0.846154	-22.7	0	2.18e-05	0.471	4.47107	3.37821	-8.70704	16	17	16	CDS		0	0
hsa-miR-382-5p	NM_001346897	EGFR	GAAGTTGTTCGTGGTGGATTCG#CCATCAAGGAAGACAGCTTCT#(((((((((..((((((.....#)))))).....))))))))).	3301	3322	1	-18.2	1	0.000153069	0.441	3.01271	2.19307	-8.00486	15	21	9	CDS		0	0
hsa-miR-382-3p	NM_001346897	EGFR	AATCATTCACGGACAACACTT#AAGTTCCGTGAGTTGATC#.((((((((((((........#.))))))))).))).	3003	3021	0.846154	-14.9	1	0.00125711	0.5	4.48387	6.12691	-5.61866	12	15	9	CDS		0	0
hsa-miR-383-3p	NM_001346897	EGFR	ACAGCACTGCCTGGTCAGA#TGATCATGGTCAAGTGCTGG#.((((((((((((((((..#)))))).)))..))))))).	2959	2979	1	-21.6	1	0.00120926	0.544	7.44219	4.90516	-3.79332	16	20	7	CDS		0	0
hsa-miR-340-3p	NM_001346897	EGFR	TCCGTCTCAGTTACTTTATAGC#CTGTGGGGCCGACAGCTATGAGATGGAG#((((((((((((.((((((((.#))))))))..))).....))))))))).	1055	1083	0.846154	-18.7	1	0.0245418	0.397	3.59035	4.4843	-5.22671	20	28	9	CDS		0	0
hsa-miR-330-5p	NM_001346897	EGFR	TCTCTGGGCCTGTGTCTTAGGC#GCTGCAGGCTGCACAGGCCCCCGGGAGAG#((((((((((((((((((.(((#)))..)))..))))))))))...))))).	834	863	0.846154	-28.1	1	0.000670741	0.338	3.84075	3.86513	-3.93757	21	29	10	CDS		0	0
hsa-miR-328-5p	NM_001346897	EGFR	GGGGGGGCAGGAGGGGCTCAGGG#CCCGGCGCAGCGCGGCCGCAGCAGCCTCCGCCCCCCG#.(((((((.(((((.(((..((.#.))..)))..)))))))))))).	16	53	0.820513	-34.6	1	1.03e-05	0.147	-0.185188	-0.153186	-5.58516	17	23	12	5UTR		0	0
hsa-miR-328-3p	NM_001346897	EGFR	CTGGCCCTCTCTGCCCTTCCGT#ATGGGAGCTGCTGGGGTGCAGGAGAGGAGAACTGCCAGA#((((((((((((((((((((((#))))).......)))))...)))))))......))))).	712	751	0.923077	-26.4	1	0.00748955	0.441	3.79296	3.25309	-3.93757	22	39	7	CDS		0	0
hsa-miR-342-5p	NM_001346897	EGFR	AGGGGTGCTATCTGTGATTGA#TCATGGTCAAGTGCTGGATGATAGACGCAGATAGTCGCCCA#..((((((((((((((.....#.))))))))).))))).	2962	3003	0.923077	-23.5	1	0.00979658	0.529	7.12416	4.74412	-4.957	14	17	9	CDS		0	0
hsa-miR-342-3p	NM_001346897	EGFR	TCTCACACAGAAATCGCACCCGT#ACGGGGTGACTGTTTGGGAG#(((((.((((...((((.(((((#))))))))))))).))))).	2824	2844	0.846154	-21.6	0	0.000299918	0.5	7.23663	5.4208	-13.2992	18	20	13	CDS		0	0
hsa-miR-337-5p	NM_001346897	EGFR	GAACGGCTTCATACAGGAGTT#TCCTCGATGAAGCCT#....((((((((..((((...#))))..)))))))).	2401	2416	0.846154	-18.3	0	0.0373238	0.441	8.37785	5.51543	-11.6925	12	15	8	CDS		0	0
hsa-miR-323a-3p	NM_001346897	EGFR	CACATTACACGGTCGACCTCT#GGAGGTGGCTGGTTATGTC#.((((.((.(((((.((((((#))))))))))))).)))).	509	528	0.846154	-18.8	0	0.000359144	0.5	5.99226	3.11959	-7.48612	17	19	13	CDS		0	0
hsa-miR-326	NM_001346897	EGFR	CCTCTGGGCCCTTCCTCCAG#CTGCCATGCCTTGTGCTCCCCCGAGGGCTGCTGGGGCCCGGAGC#.((((((((((((((((...#.))))).....))))))))))).	1640	1684	0.923077	-28.7	1	9.23e-09	0.309	2.40089	2.51444	-3.79332	16	23	11	CDS		0	0
hsa-miR-326	NM_001346897	EGFR	CCTCTGGGCCCTTCCTCCAG#CTGGTGGTGGCCCTGGGGA#((((.(((((...((.((((#)))).)).))))).)))).	2097	2116	0.846154	-25.4	0	1.2e-05	0.324	1.77131	3.04965	-15.7504	15	19	5	CDS		0	0
hsa-miR-151a-5p	NM_001346897	EGFR	TCGAGGAGCTCACAGTCTAGT#CTGACTCCGTCCAGTATTGATCGGGAGAGCCGGAGCGAGCTCTTCGGG#(((((((((((.(..(((.((#.)).)))).))))))))))).	205	253	0.923077	-20.3	1	0.000195314	0.324	-0.20831	-0.178672	-8.87667	17	21	11	5UTR		0	0
hsa-miR-151a-3p	NM_001346897	EGFR	CTAGACTGAAGCTCCTTGAGG#CTGAAGGAGCTGCCCATGAGA#((.......((((((((.((.#)).)))))))).......)).	654	675	0.923077	-17	0	0.0205092	0.544	2.32016	2.30015	-19.4608	12	21	8	CDS		0	0
hsa-miR-148b-5p	NM_001346897	EGFR	AAGTTCTGTTATACACTCAGGC#GCCGCAAAGTGTGTAACGGAATA#..(((((((((((((((..(((#)))....))))))))))))))).	1123	1146	0.871795	-23.8	1	0.0825244	0.544	4.79023	3.66304	-4.957	18	23	15	CDS		0	0
hsa-miR-148b-3p	NM_001346897	EGFR	TCAGTGCATCACAGAACTTTGT#CTGTGCCATCCAAACTGCACCTACGGATGCACTGGG#((((((((((............#.)))))))))).	1980	2016	0.846154	-16.6	1	0.00176811	0.426	4.05514	2.67438	-13.2236	10	12	10	CDS		1	0
hsa-miR-331-5p	NM_001346897	EGFR	CTAGGTATGGTCCCAGGGATCC#GGTCCTTGGGAATTTGGAAATTACCTAT#.((((((...(((((((((((.#)))))))))))..........)))))).	440	468	1	-23.8	1	0.0251792	0.603	3.93811	2.82099	-8.40586	17	28	11	CDS		0	0
hsa-miR-331-5p	NM_001346897	EGFR	CTAGGTATGGTCCCAGGGATCC#GGGCTGCTGGGGCCCGGAGCCCAGG#((.(((..((((((((.(.(((#))).).))))))))....))).)).	1664	1689	0.846154	-22.4	0	4.76e-07	0.294	7.50643	2.20277	-9.35244	17	25	8	CDS		0	0
hsa-miR-331-5p	NM_001346897	EGFR	CTAGGTATGGTCCCAGGGATCC#ATCCTTGGGATTACGCTC#...(((.(((((((((((((..#))))))))))))).))).	1463	1481	1	-21.9	0	5.7e-05	0.529	2.58874	3.393	-8.05823	16	18	13	CDS		0	0
hsa-miR-331-3p	NM_001346897	EGFR	GCCCCTGGGCCTATCCTAGAA#CTGGGGCCCGGAGCCCAGGGACTGCG#((((((((((((.((((((..#))))))...)).))))))))...)).	1670	1696	0.846154	-27.6	1	5.92e-05	0.265	2.6173	2.26128	-5.22671	18	26	8	CDS		0	0
hsa-miR-331-3p	NM_001346897	EGFR	GCCCCTGGGCCTATCCTAGAA#CTGGGCCAGGTCTTGAAGGCTGTCCAACGAATGGGCCTAAGATCCCGTCCATCGCCACTGGGATGGTGGGGGCC#((((((..(((.(((((((..#.)))))))))))))))).	2011	2085	0.923077	-25.5	0	4.26e-06	0.324	3.24384	2.25743	-11.1417	16	18	16	CDS		0	0
hsa-miR-324-5p	NM_001346897	EGFR	CGCATCCCCTAGGGCATTGGTG#GCCAAGTCCTACAGACTCCAACTTCTACCGTGCCCTGATGGATGAAGAAGACATGGACGACGTGGTGGATGCC#.(((((((((((((((.(((((#.))))))))))))..........................)).)))))).	3092	3165	0.923077	-26	1	0.00061025	0.441	3.92017	4.77387	-3.79332	20	49	12	CDS		0	0
hsa-miR-324-5p	NM_001346897	EGFR	CGCATCCCCTAGGGCATTGGTG#GCTGGTGGTGGCCCTGGGGATCGG#((.((((((.(((((((((((.#))))))....))))))))))))).	2096	2120	0.846154	-24.3	0	5.59e-07	0.338	1.98582	3.01357	-6.73762	19	24	13	CDS		0	0
hsa-miR-324-3p	NM_001346897	EGFR	CCCACTGCCCCAGGTGCTGCTGG#CCAGGTGCTCCCTCCAGCATCTCCAGAGGGGGAAACAGTGGC#.((((((((((((((((((..((#.))..)))))))).....))))....)))))).	3476	3518	0.846154	-28.2	1	0.000362954	0.426	-0.858473	-0.537012	-3.79332	20	33	8	CDS		0	0
hsa-miR-335-3p	NM_001346897	EGFR	TTTTTCATTATTGCTCCTGACC#AGGAGCTGCCCATGAGAAAT#((((((((....((((((....#)))))).....)))))))).	658	678	0.846154	-15.7	1	0.015763	0.529	2.79807	2.38223	-12.408	14	20	8	CDS		0	1
hsa-miR-133b	NM_001346897	EGFR	TTTGGTCCCCTTCAACCAGCTA#CTGGGATGGTGGGGGCCC#...(((((((.(((.((((...#))))..))).))))))).	2068	2086	0.923077	-22.4	0	4.71e-06	0.324	4.35492	1.83381	-10.0748	14	18	7	CDS	MIRT007069	1	1
hsa-miR-133b	NM_001346897	EGFR	TTTGGTCCCCTTCAACCAGCTA#GCTGGTGGTGGCCCTGGGGATCGGC#.(((((((((.(((((((((..#))))))..)))....))))))))).	2096	2121	0.846154	-22.8	1	1.02e-06	0.338	2.10417	2.87136	-6.6181	18	25	9	CDS	MIRT007069	1	1
hsa-miR-133b	NM_001346897	EGFR	TTTGGTCCCCTTCAACCAGCTA#GACGGGGACCAGAC#((((((((((.((.........#)).)))))))))).	1843	1857	1	-20.6	1	0.000179642	0.456	3.82	3.2181	-8.58769	12	14	10	CDS	MIRT007069	1	1
hsa-miR-325	NM_001346897	EGFR	CCTAGTAGGTGTCCAGTAAGTGT#CACGTGCAAGGACACCTGCC#....((((((((((.(((.(((.#))).)))..)))))))))).	899	919	0.846154	-22.9	0	0.000372426	0.397	4.53429	3.89497	-10.282	16	20	10	CDS		0	0
hsa-miR-345-5p	NM_001346897	EGFR	GCTGACTCCTAGTCCAGGGCTC#GAGCCCAGGGACTGCGTCTCTTGCCGGAATGTCAGCC#(((((((((((((((.((((((#))))))..))))))...........)))..)))))).	1680	1717	0.846154	-30.2	1	0.00060136	0.368	2.88683	3.55933	-4.17062	21	37	6	CDS		0	0
hsa-miR-345-5p	NM_001346897	EGFR	GCTGACTCCTAGTCCAGGGCTC#GGCCCTGGGGATCGGCC#(((((.(((....((((((((.#)))))))))))))))).	2105	2122	1	-24.6	0	5.25e-06	0.338	1.92387	2.97951	-14.5417	16	17	16	CDS		0	0
hsa-miR-346	NM_001346897	EGFR	TGTCTGCCCGCATGCCTGCCTCT#GAGGCAGGGAATGCGTGGACAA#(((((...(((((.((((((((.#))))))))..))))).))))).	1717	1739	0.846154	-29	0	0.00408468	0.397	1.879	3.56204	-10.5527	18	22	8	CDS		0	0
hsa-miR-196b-5p	NM_001346897	EGFR	TAGGTAGTTTCCTGTTGTTGGG#CCCAATGGGAGCTGCTGGGGTGCAGGAGAGGAGAACTGCCA#..((((((((((((((((((((#)))))))..............))))))......))))))).	708	749	0.846154	-20.8	1	0.00725094	0.441	3.26969	3.4232	-4.957	20	41	7	CDS		0	0
hsa-miR-422a	NM_001346897	EGFR	ACTGGACTTAGGGTCAGAAGGC#GCCCCCTGACTCCGTCCAGTA#(((((((...(((((((..(((#)))..))))))).))))))).	200	221	0.923077	-26.1	1	0.0102711	0.338	-0.00715806	-0.301068	-8.55011	17	21	7	5UTR		0	0
hsa-miR-423-5p	NM_001346897	EGFR	TGAGGGGCAGAGAGCGAGACTTT#TCACGCAGCTCATGCCCTTCGG#((((((((((((.(((.((....#)).)))..))).))))))))).	2491	2513	0.903846	-22.8	1	4.82e-05	0.382	4.40307	4.93662	-5.22671	17	22	9	CDS		0	1
hsa-miR-423-5p	NM_001346897	EGFR	TGAGGGGCAGAGAGCGAGACTTT#GAGTGGCTTGTCTGGAAACAGTCCTGCTCCTCAA#((((((((((.(((((((((((.#))))..)))))..........)))))))))))).	3399	3433	0.865385	-22.5	1	0.00888355	0.412	0.515253	0.693131	-6.76235	21	34	12	CDS		0	1
hsa-miR-423-3p	NM_001346897	EGFR	AGCTCGGTCTGAGGCCCCTCAGT#GCTGCTGGGGCCCGGAGCCCAGGGACTG#(((((((((((.((((((.((((#))))..)))))))))).))..))).)).	1666	1694	1	-27	1	1.14e-05	0.279	1.92713	2.33675	-7.28438	21	28	10	CDS		0	0
hsa-miR-18b-5p	NM_001346897	EGFR	TAAGGTGCATCTAGTGCAGTTAG#AACTGCACCTACGGATGCACTG#...(((((((((.((((((((..#))))))))....))))))))).	1992	2014	1	-24.1	0	0.000188747	0.426	1.95896	2.06237	-7.80367	17	22	9	CDS		0	0
hsa-miR-18b-5p	NM_001346897	EGFR	TAAGGTGCATCTAGTGCAGTTAG#CTGGCTGCGCTCTGCCCG#...((.(((...(((((((((((#))))))))))).))))).	303	321	0.846154	-21.6	0	2.5e-05	0.309	-0.0140937	0.930489	-15.8296	16	18	11	CDS		0	0
hsa-miR-18b-3p	NM_001346897	EGFR	TGCCCTAAATGCCCCTTCTGGC#GCCGGTGGCATTTAGGGG#..(((((((((((....(((((#))))).))))))))))).	1241	1259	1	-25.4	1	1.78e-06	0.426	1.8587	3.07997	-6.78234	16	18	11	CDS		0	0
hsa-miR-20b-5p	NM_001346897	EGFR	CAAAGTGCTCATAGTGCAGGTAG#GCCTCCGCCCCCCGCACGGTGTGAGCGCC#....(((((((((((((.((...#.)).))))..))))))))).	39	68	0.846154	-21.4	0	5.46e-05	0.176	-0.349656	-0.053274	-9.54656	15	20	9	5UTR		1	0
hsa-miR-20b-3p	NM_001346897	EGFR	ACTGTAGTATGGGCACTTCCAG#CTGAAGGAGCTGCCCATGAGAAATTTACAGG#.(((((((((((((((((((((#)))..)))).))))))))......)))))).	654	685	0.923077	-21.4	1	0.0142803	0.515	2.32427	2.56721	-3.79332	21	31	8	CDS		0	0
hsa-miR-429	NM_001346897	EGFR	TAATACTGTCTGGTAAAACCGT#ACGGGGACCAGACAACTGTATC#..((((((((((((....((((#))))..))))))))...)))).	1844	1866	0.923077	-18.7	1	0.0151669	0.426	2.50271	3.38909	-5.9255	16	22	8	CDS		0	0
hsa-miR-450a-5p	NM_001346897	EGFR	TTTTGCGATGTGTTCCTAATAT#GGGAATGCGTGGACAAGT#.(((((.((((((((((.....#)))))))))).).)))).	1723	1741	0.923077	-15.9	0	0.0139795	0.382	3.41465	3.32021	-5.33701	15	18	10	CDS		0	0
hsa-miR-431-5p	NM_001346897	EGFR	TGTCTTGCAGGCCGTCATGCA#TGCGTCCGAGCCTGTGGGGCC#.(((((((((((((..(((((#))))).)).))))))))))).	1044	1065	0.923077	-23.1	1	5.96e-07	0.368	2.72017	4.69621	-4.76182	18	21	11	CDS		0	0
hsa-miR-431-3p	NM_001346897	EGFR	CAGGTCGTCTTGCAGGGCTTCT#GGTGGCCCTGGGGATCGGCCTC#.((((((((((.(((((((.((#)).))))))))))).)))))).	2102	2124	1	-26.1	1	2.06e-06	0.368	1.6592	3.13476	-7.14013	19	22	11	CDS		0	0
hsa-miR-433-3p	NM_001346897	EGFR	ATCATGATGGGCTCCTCGGTGT#GGACTGAAGGAGCTGCCCATGAG#.(((((...(((((((((((.(#).))))).))))))...))))).	651	674	0.923077	-22.1	0	0.0225843	0.559	2.52571	2.22153	-8.70704	17	23	6	CDS		0	0
hsa-miR-329-5p	NM_001346897	EGFR	GAGGTTTTCTGGGTTTCTGTTTC#GAGTGCATACAGTGCCACCCAGAGTGCCTG#.((((.((((((((..((((...#.))))....)))))))).)))).	1785	1815	0.846154	-22	0	3.34e-05	0.426	2.54665	3.06668	-6.66278	16	23	8	CDS		0	0
hsa-miR-452-5p	NM_001346897	EGFR	AACTGTTTGCAGAGGAAACTGA#TCAGTTTTCTCTTGCAGTCGTCAGC#..(((.((((((((((((((((#)))))))))))).))))....))).	1427	1452	1	-20.6	0	0.0213661	0.529	2.65123	3.69167	-6.85796	19	25	12	CDS		0	0
hsa-miR-412-3p	NM_001346897	EGFR	ACTTCACCTGGTCCACTAGCCGT#ACGGATGCACTGGGCCAGGTCTTGAAGG#.((((((((((((((....((((#))))......))))))))))...)))).	2002	2030	1	-25.4	1	6.2e-05	0.441	3.16197	2.36598	-4.02637	18	28	10	CDS		0	0
hsa-miR-412-3p	NM_001346897	EGFR	ACTTCACCTGGTCCACTAGCCGT#CGGCGAGTCGGGCTCTGGAGG#.(((((...((((((((.((((.#)))).))).))))).))))).	319	340	0.846154	-21.3	0	4.87e-05	0.397	-0.347679	1.30055	-8.70704	17	21	5	CDS		0	0
hsa-miR-410-5p	NM_001346897	EGFR	AGGTTGTCTGTGATGAGTTCG#TGCAGCTCATCACGCAGCTC#.((((((..((((((((((..#.)))))))))))))))).	2482	2502	0.846154	-20.2	1	0.000262274	0.397	4.98967	4.87197	-7.16335	16	18	16	CDS		0	0
hsa-miR-376b-5p	NM_001346897	EGFR	CGTGGATATTCCTTCTATGTTT#GCGTGAAGAAGTGTCCCCGT#((.(((((((.((((.((((..#)))))))).))))))).)).	997	1017	0.846154	-15.8	0	0.00642297	0.471	4.20916	4.65152	-8.55294	17	20	8	CDS		0	0
hsa-miR-483-3p	NM_001346897	EGFR	TCACTCCTCTCCTCCCGTCTT#ATGGGAGCTGCTGGGGTGCAGGAGAGGAGA#...((((((((((((((....#.))))....)))))))))).	712	742	0.923077	-23.4	0	0.00128743	0.456	4.16775	3.51768	-6.51454	14	20	10	CDS		0	0
hsa-miR-484	NM_001346897	EGFR	TCAGGCTCAGTCCCCTCCCGAT#TCTGGAGGGTGAGCCA#...((((((...((((((.((.#)).)))))))))))).	1748	1764	1	-23.4	0	0.000318202	0.471	4.6353	2.7006	-13.9286	14	16	12	CDS		0	0
hsa-miR-485-3p	NM_001346897	EGFR	GTCATACACGGCTCTCCTCTCT#GGAGAGGAGAACTGCCAGAAACTGACC#((((.....(((((((((((((#))))))))))...)))......)))).	732	759	0.923077	-23.3	0	0.00307784	0.426	2.75358	3.44411	-14.8713	17	27	10	CDS		0	0
hsa-miR-486-5p	NM_001346897	EGFR	TCCTGTACTGAGCTGCCCCGAG#TCCAAGCTGTCCCAATGGGAGCTGCTGGGGTGCAGGAG#(((((((((.(((.((((((..#.)))).)).)))..))))))))).	698	736	1	-27.1	1	7.08e-05	0.456	3.3173	3.24999	-6.03692	18	24	9	CDS		0	0
hsa-miR-486-5p	NM_001346897	EGFR	TCCTGTACTGAGCTGCCCCGAG#CGGGGCAGCGCTCCTGGCGCTGCTGGCTGCGCTCTGCCCGGCGAGTCGGGC#.((((.((((((((((((((..#)))))))))..))..............................))))))).	281	332	0.846154	-23	0	2.13e-08	0.353	-0.256512	1.41308	-5.69428	18	51	9	CDS		0	0
hsa-miR-487a-3p	NM_001346897	EGFR	AATCATACAGGGACATCCAGTT#GCTGGATGATAGACGCAGATAGTCGCCCAAAGTTCCGTGAGTTGATC#.((((..((.(((((((((((.#)))))))).........................))).))...)))).	2974	3021	0.846154	-16.7	0	0.00125711	0.5	5.84801	5.20668	-8.48048	17	47	8	CDS		0	0
hsa-miR-488-5p	NM_001346897	EGFR	CCCAGATAATGGCACTCTCAA#TGAGGACAGCATAGACGACACCTTCCTCCCAGTGCCTGGTGAGTGGCTTGTCTGGA#.((((((((.(.((((((((.#.))).))))).))))))))).	3359	3415	0.846154	-22.4	1	2.77e-07	0.412	2.40926	2.7144	-8.38263	17	21	9	CDS		0	0
hsa-miR-489-5p	NM_001346897	EGFR	GGTCGTATGTGTGACGCCATTT#GGTGGCATTTAGGGGTGACTCCTTCACACATACTCCT#((..((((((((((((((....#.))))......)))))))))).)).	1244	1281	0.846154	-20.1	0	0.0628943	0.485	2.94502	3.21946	-8.52714	16	25	10	CDS		0	0
hsa-miR-490-3p	NM_001346897	EGFR	CAACCTGGAGGACTCCATGCTG#CAGCAGCCAGTCTCCAGTGTC#..(((((((.((((...(((((#)))))...))))))))).)).	3451	3472	0.846154	-20	1	0.0381603	0.368	-0.674875	-0.767101	-7.16801	16	21	9	CDS		0	0
hsa-miR-491-5p	NM_001346897	EGFR	AGTGGGGAACCCTTCCATGAGG#CTTCATGCGAAGGCGCCACA#.((((.(...((((((((((((#))))))).)))))).)))).	2123	2143	0.846154	-22.6	0	1.15e-05	0.324	3.04127	2.94687	-10.3068	17	20	7	CDS	MIRT732437	0	0
hsa-miR-491-5p	NM_001346897	EGFR	AGTGGGGAACCCTTCCATGAGG#CCTTCTGGAGGGTGAGCCAA#..(((...((((.((((.((((#)))).))))))))...))).	1745	1765	0.846154	-20.6	0	0.000521374	0.485	3.06027	2.56106	-12.0044	15	20	8	CDS	MIRT732437	0	0
hsa-miR-511-5p	NM_001346897	EGFR	GTGTCTTTTGCTCTGCAGTCA#TGTGTGCAGATCGCAAAGGGCATG#(((((((((((((((((..((#))..))))))..))))))))))).	2577	2601	0.807692	-23.3	1	0.00145437	0.456	6.38539	4.86529	-3.93757	19	24	11	CDS		0	0
hsa-miR-511-5p	NM_001346897	EGFR	GTGTCTTTTGCTCTGCAGTCA#GGCTGCAAAGCTGTCCCATCAAGGAAGACAG#.(((((((((((.(((((((.#))))))).)))...........)))))))).	3286	3317	0.923077	-21.2	1	0.000431025	0.485	2.10236	2.4864	-5.08246	18	31	8	CDS		0	0
hsa-miR-146b-3p	NM_001346897	EGFR	GCCCTGTGGACTCAGTTCTGGT#ACCAGAGTGATGTCTGGAGCTACGGGGTG#(((((((((..(((((((((((#)))))))......))))..))))))))).	2803	2832	0.942308	-26	1	0.000133111	0.5	6.49066	5.61778	-8.00486	20	29	9	CDS		0	0
hsa-miR-146b-3p	NM_001346897	EGFR	GCCCTGTGGACTCAGTTCTGGT#ACCGGACTGAAGGAGCTGCCCATGAGAAATTTACAGGGCC#(((((((((((((((.((((((#)))))))))).).................)))))))))).	648	688	1	-24.1	1	0.0152984	0.471	2.6758	2.53082	-4.17062	21	40	10	CDS		0	0
hsa-miR-146b-3p	NM_001346897	EGFR	GCCCTGTGGACTCAGTTCTGGT#GCCCAGGGACTGCGTCTCTTGCCGGAATGTCAGCCGAGGCAGGGA#.((((((((((.((((((((((#)))..))))))).)))).....................)))))).	1682	1727	0.846154	-23.8	1	2.31e-05	0.397	2.48058	2.6337	-7.14013	20	45	7	CDS		0	0
hsa-miR-202-3p	NM_001346897	EGFR	AGAGGTATAGGGCATGGGAA#CTCATGCCCTTCGGCTGCCTCC#.((((((.((((((((((..#)))))))))).....)))))).	2499	2521	0.846154	-24.5	1	2.38e-05	0.441	5.25492	4.88358	-6.10696	16	22	10	CDS		0	0
hsa-miR-202-3p	NM_001346897	EGFR	AGAGGTATAGGGCATGGGAA#TGCCATGCCTTGTGCTC#...((((((((((((((.(.#).)))))))))))))).	1641	1658	1	-23.8	0	0.00109395	0.279	2.39464	2.7114	-6.51454	15	17	14	CDS		0	0
hsa-miR-202-3p	NM_001346897	EGFR	AGAGGTATAGGGCATGGGAA#TTCCTATGCCTTAGCAGTCTT#(((....(((((((((((((#)))))))))))))....))).	605	626	1	-21.4	0	0.0134064	0.662	2.58105	2.80003	-14.5333	16	21	13	CDS		0	0
hsa-miR-492	NM_001346897	EGFR	AGGACCTGCGGGACAAGATTCTT#ATCTGTGCCCAGCAGTGCTCCG#.(((((((((((((.((((....#)))))).))).)))).).))).	765	787	0.846154	-18	1	3.19e-05	0.397	5.20189	3.95321	-4.52877	17	22	6	CDS		0	1
hsa-miR-492	NM_001346897	EGFR	AGGACCTGCGGGACAAGATTCTT#TGTGCTGCAGGCTG#.((.(((((((.(((........#))).))))))))).	831	845	1	-18	0	1.44e-05	0.309	3.75813	3.8008	-10.4052	12	14	9	CDS		0	1
hsa-miR-493-5p	NM_001346897	EGFR	TTGTACATGGTAGGCTTTCATT#GATGAAGCCTACGTGATGGCCAGCGTGGACAACCCCCACGTGTGCC#..(((((((((((((.((((((#))))))))))))..........................))))))).	2406	2452	0.846154	-19.3	1	0.000572821	0.324	5.61708	5.33685	-5.19005	19	46	12	CDS		1	0
hsa-miR-432-3p	NM_001346897	EGFR	CTGGATGGCTCCTCCATGTCT#AGACATGGACGACGTGGTGGATGCCGACGAGT#((.(.(((((((.(((((((.#.))))))).))).)))).).)).	3140	3172	0.846154	-24.5	0	0.000154929	0.441	5.17434	4.30383	-10.9033	17	23	7	CDS		0	1
hsa-miR-494-5p	NM_001346897	EGFR	AGGTTGTCCGTGTTGTCTTCTCT#GGATGAAGAAGACATGGACGACGTG#(.((((((((((((.((((((((#))).))))).)))))))))))).).	3131	3156	0.961538	-26.9	1	0.0014473	0.441	4.9007	4.1653	-5.8367	21	25	12	CDS		0	0
hsa-miR-494-5p	NM_001346897	EGFR	AGGTTGTCCGTGTTGTCTTCTCT#GAGGACAGCATAGACGACA#..((((((.(((((((((((...#))))))))))).)))))).	3360	3379	0.923077	-25.2	1	0.0125485	0.397	1.91139	2.70159	-6.01339	17	19	11	CDS		0	0
hsa-miR-495-5p	NM_001346897	EGFR	GAAGTTGCCCATGTTATTTTCG#AGCAGGGCTTCTTCA#((((..((((.((((.......#))))))))..)))).	3184	3199	0.923077	-17.3	0	0.000385691	0.368	5.31116	4.02848	-13.0154	12	15	8	CDS		0	0
hsa-miR-496	NM_001346897	EGFR	TGAGTATTACATGGCCAATCTC#AGACGCCGGCCATGTGTGCCAC#((.(((.(((((((((......#.)))))))))))))).	1958	1980	0.974359	-18.6	0	0.000281792	0.397	1.82891	3.26149	-7.0388	14	16	14	CDS		0	0
hsa-miR-193b-5p	NM_001346897	EGFR	CGGGGTTTTGAGGGCGAGATGA#TCATCTGTGCCCAGCAGTGCTCCGG#((((((.(((.(((((((((((#)))))).)))))..))).)))))).	763	788	0.923077	-26.5	0	1.97e-05	0.397	4.20147	3.50264	-8.30604	20	25	6	CDS		0	0
hsa-miR-193b-3p	NM_001346897	EGFR	AACTGGCCCTCAAAGTCCCGCT#GGCCTAAGATCCCGTCCATCGCCACTGGGATGGTGGGGGCCC#....((((((((..((((((..#.))))))..)))))))).	2044	2086	0.923077	-26.8	0	4.71e-06	0.324	1.92387	2.36645	-11.6925	14	18	8	CDS		0	0
hsa-miR-497-3p	NM_001346897	EGFR	CAAACCACACTGTGGTGTTAGA#TCTTACACCCAGTGGAGA#....(..(((((.(((((.(((#))).))))))))))..).	2198	2216	1	-17.8	0	0.00407686	0.441	3.9732	4.70649	-14.2803	14	18	10	CDS		0	0
hsa-miR-181d-5p	NM_001346897	EGFR	AACATTCATTGTTGTCGGTGGGT#GCCTGTGGGGCCGACAGCTATGAGATGG#..(((((((.(((((((((((((#)))).....))))))))).))))).)).	1053	1081	0.846154	-22.6	1	0.00536649	0.382	2.20778	4.52453	-6.19951	20	28	9	CDS		0	0
hsa-miR-181d-5p	NM_001346897	EGFR	AACATTCATTGTTGTCGGTGGGT#CCCACCACGTACCAGATGGATGTG#.((((((((((((((.((((((.#))))))))).))..))))))))).	939	963	0.923077	-22.3	1	0.000613371	0.456	3.63081	4.17484	-4.02637	20	24	9	CDS		0	0
hsa-miR-181d-3p	NM_001346897	EGFR	CCACCGGGGGATGAATGTCAC#CATCCTGCCGGTGGC#(((((((((((((........#)))))).))))))).	1235	1250	0.923077	-22.7	1	7.2e-05	0.441	1.74361	3.33494	-5.76291	13	15	7	CDS		0	0
hsa-miR-512-5p	NM_001346897	EGFR	CACTCAGCCTTGAGGGCACTTTC#GGGGGCCCTCCTCTTGCTGCTGGTGG#((((((((...((((((.((((.#)))))))))).....))))..)))).	2078	2104	0.846154	-21.1	1	0.000157773	0.324	2.12636	2.61666	-9.06125	18	26	10	CDS		0	0
hsa-miR-512-3p	NM_001346897	EGFR	AAGTGCTGTCATAGCTGAGGTC#GCCTTGACTGAGGACAGCATA#..((((((((.(((.((((((.#)))))).)))..)))))))).	3351	3372	0.923077	-20.6	1	0.000389434	0.397	1.38738	2.55044	-8.51722	17	21	8	CDS		0	0
hsa-miR-512-3p	NM_001346897	EGFR	AAGTGCTGTCATAGCTGAGGTC#CGGCCGGGGCAGCGCTC#.(((((((((...((((.....#))))...))))))))).	277	294	0.846154	-20.5	1	4.39e-08	0.206	-0.288334	-0.0262323	-11.254	13	17	9	CDS		0	0
hsa-miR-498-5p	NM_001346897	EGFR	TTTCAAGCCAGGGGGCGTTTTTC#GGAGAGCGACTGCCTGGTCTGC#...((.((((((.((((((((((#)))))))).)).)))))).)).	857	879	0.846154	-23.2	0	8.46e-05	0.338	3.6115	4.23567	-9.70463	18	22	8	CDS		0	0
hsa-miR-498-5p	NM_001346897	EGFR	TTTCAAGCCAGGGGGCGTTTTTC#GAAAACAACACCCTGGTCTGGAAG#(((((.((((((((..((((((.#))))))..).))))))).))))).	1929	1953	0.923077	-21.9	0	4.01e-05	0.412	1.88282	2.95297	-6.80703	19	24	7	CDS		0	0
hsa-miR-498-3p	NM_001346897	EGFR	AAAGCACCTCCAGAGCTTGAAGC#GCTCTGCCCGGCGAGTCGGGCTCTGGAGGA#......((((((((((((((.((#.))...)))))))))))))).	311	341	0.846154	-27	0	6.79e-05	0.397	-0.69385	1.37309	-15.5666	16	21	14	CDS		0	0
hsa-miR-498-3p	NM_001346897	EGFR	AAAGCACCTCCAGAGCTTGAAGC#GAGCTGCTGGGGTGCA#...(((((.(((((((((.....#))))).))))))))).	716	732	0.923077	-23.1	0	6.5e-06	0.441	4.37737	3.09004	-7.57093	14	16	9	CDS		0	0
hsa-miR-520e-5p	NM_001346897	EGFR	CTCAAGATGGAAGCAGTTTCTG#CAGATTTGATCCCTGTTCTCTCTGCTGGCTCTATCTTGAC#.((((((((((..((((.....#.))))..)))))))))).	3742	3782	1	-19	1	0.00325821	0.647	-0.487406	-0.229639	-8.42926	14	18	10	3UTR		0	0
hsa-miR-515-3p	NM_001346897	EGFR	GAGTGCCTTCTTTTGGAGCGTT#GGCTGCTGCAGGAGAGGGAGCTTG#((((.((((((((((.((((((#))).))).)))))))))).)))).	2167	2191	1	-24	0	0.000340839	0.368	3.92219	4.17725	-8.28966	20	24	10	CDS		0	0
hsa-miR-515-3p	NM_001346897	EGFR	GAGTGCCTTCTTTTGGAGCGTT#GGGCTCTGGAGGAAAAGAAAGTTTGCCAAGGCACG#..(((((((((((((((((.(.#).)))))))))))...............)))))).	328	363	0.923077	-21.6	1	0.000800341	0.485	2.55416	1.08913	-4.957	18	35	11	CDS		0	0
hsa-miR-519e-5p	NM_001346897	EGFR	TTCTCCAAAAGGGAGCACTTTC#AGGTGCTCCCTCCAGCATCTCCAGAGGGGGAAA#((((((...(((((((((((..#)))))))))))...............)))))).	3478	3511	0.884615	-23.6	0	7.78e-06	0.426	-1.12552	-0.592675	-8.85129	17	33	11	CDS		0	0
hsa-miR-519e-5p	NM_001346897	EGFR	TTCTCCAAAAGGGAGCACTTTC#AAGTGCAACCTTCTGGAGGGT#(((((((.((((..((((((..#))))))..)))).))))))).	1737	1758	0.846154	-22.9	1	9.94e-05	0.441	4.02591	2.73505	-8.39718	17	21	7	CDS		0	0
hsa-miR-519e-5p	NM_001346897	EGFR	TTCTCCAAAAGGGAGCACTTTC#GGATTACGCTCCCTCAAGGAGAT#.(((((...(((((((......#.)))))))...))))).	1470	1493	0.923077	-21.8	0	1.75e-05	0.588	4.0262	3.07235	-8.70704	12	17	7	CDS		0	0
hsa-miR-519e-3p	NM_001346897	EGFR	AAGTGCCTCCTTTTAGAGTGTT#GCACGCTGCGGAGGCTGCTG#.(((((((((...(((.((((.#)))).))).)))))).))).	2155	2175	0.846154	-19.8	1	6.58e-07	0.353	3.60337	4.11007	-11.254	16	20	6	CDS		0	0
hsa-miR-520f-5p	NM_001346897	EGFR	CCTCTAAAGGGAAGCGCTTTCT#GGAAGCGCACGCTGCGGAGGC#(((((..((.(..((((((((.#)))))))).).))..))))).	2149	2170	0.923077	-22.5	0	7.86e-07	0.338	4.48332	3.51713	-13.2607	16	21	8	CDS		0	1
hsa-miR-520f-5p	NM_001346897	EGFR	CCTCTAAAGGGAAGCGCTTTCT#GGAATGCGTGGACAAGTGCAACCTTCTGGAGGG#((((((.((((..(((((((((#.))).))))))..)))).)))))).	1724	1757	0.923077	-22.5	0	0.000176703	0.441	4.07091	2.96702	-10.1172	19	25	6	CDS		0	1
hsa-miR-520f-3p	NM_001346897	EGFR	AAGTGCTTCCTTTTAGAGGGTT#AACCTTCTGGAGGGTGAGCCA#..(.((((((((((((((((((#)))))))))))))).))))).	1743	1764	0.923077	-23.3	0	0.000318202	0.471	3.57227	2.89522	-7.98902	19	21	14	CDS		0	0
hsa-miR-519c-5p	NM_001346897	EGFR	CTCTAGAGGGAAGCGCTTTCTG#CGGAATGTCAGCCGAGGCAGGGAATGCGTGGACAAGTGCAACCTTCTGGAGG#((((((((((..(((((((((.#.))).))))))..)))))))))).	1704	1756	1	-26.2	1	0.000503188	0.441	1.97088	3.59802	-10.1092	19	24	10	CDS		0	0
hsa-miR-519c-5p	NM_001346897	EGFR	CTCTAGAGGGAAGCGCTTTCTG#CAGTGGAGCGAATTCCTTTGGAA#.((((((((((..(((((((((#))).))))))..)))))))))).	544	567	1	-22.9	1	0.000377011	0.559	3.68913	3.8327	-8.42926	19	23	10	CDS		0	0
hsa-miR-519c-3p	NM_001346897	EGFR	AAAGTGCATCTTTTTAGAGGAT#CACCTACGGATGCACTG#..(((((((((...(((..(..#)..))).))))))))).	1997	2014	0.846154	-15.8	1	0.000188747	0.426	1.95896	2.06237	-10.4498	13	17	9	CDS		0	0
hsa-miR-520a-5p	NM_001346897	EGFR	CTCCAGAGGGAAGTACTTTCT#GGAATGTCAGCCGAGGCAGGGAATGCGTGGACAAGTGCAACCTTCTGGAGG#((((((((((..(((((((((#.))).))))))..)))))))))).	1705	1756	1	-26.3	1	0.000503188	0.441	1.9315	3.44465	-10.1092	19	24	10	CDS		0	0
hsa-miR-519b-5p	NM_001346897	EGFR	CTCTAGAGGGAAGCGCTTTCTG#CGGAATGTCAGCCGAGGCAGGGAATGCGTGGACAAGTGCAACCTTCTGGAGG#((((((((((..(((((((((.#.))).))))))..)))))))))).	1704	1756	1	-26.2	1	0.000503188	0.441	1.97088	3.59802	-10.1092	19	24	10	CDS		0	0
hsa-miR-519b-5p	NM_001346897	EGFR	CTCTAGAGGGAAGCGCTTTCTG#CAGTGGAGCGAATTCCTTTGGAA#.((((((((((..(((((((((#))).))))))..)))))))))).	544	567	1	-22.9	1	0.000377011	0.559	3.68913	3.8327	-8.42926	19	23	10	CDS		0	0
hsa-miR-519b-3p	NM_001346897	EGFR	AAAGTGCATCCTTTTAGAGGTT#ACCTGTGCCATCCAAACTGCACCTACGGATGCACTG#..(((((((((...(((..((.#.))..))).))))))))).	1978	2014	0.884615	-19.1	1	0.000188747	0.426	3.09565	2.57743	-10.4498	14	19	9	CDS		0	0
hsa-miR-525-5p	NM_001346897	EGFR	CTCCAGAGGGATGCACTTTCT#GGAATGTCAGCCGAGGCAGGGAATGCGTGGACAAGTGCAACCTTCTGGAGG#((((((((((.((((((((((#.))).))))))).)))))))))).	1705	1756	1	-30.5	1	0.000503188	0.441	1.84917	3.6746	-6.76235	20	24	10	CDS		0	0
hsa-miR-525-3p	NM_001346897	EGFR	GAAGGCGCTTCCCTTTAGAGCG#GCTCTGGAGGAAAAGAAAGTTTGCCA#...((((((((((((((((((.#))))))))))....))).))..))).	330	356	1	-21.2	0	0.0394376	0.426	2.09001	1.26639	-6.51454	18	26	10	CDS		0	0
hsa-miR-523-5p	NM_001346897	EGFR	CTCTAGAGGGAAGCGCTTTCTG#CGGAATGTCAGCCGAGGCAGGGAATGCGTGGACAAGTGCAACCTTCTGGAGG#((((((((((..(((((((((.#.))).))))))..)))))))))).	1704	1756	1	-26.2	1	0.000503188	0.441	1.97088	3.59802	-10.1092	19	24	10	CDS		0	0
hsa-miR-523-5p	NM_001346897	EGFR	CTCTAGAGGGAAGCGCTTTCTG#CAGTGGAGCGAATTCCTTTGGAA#.((((((((((..(((((((((#))).))))))..)))))))))).	544	567	1	-22.9	1	0.000377011	0.559	3.68913	3.8327	-8.42926	19	23	10	CDS		0	0
hsa-miR-523-3p	NM_001346897	EGFR	GAACGCGCTTCCCTATAGAGGGT#ACCTTCTGGAGGGTGAGCCAAGGGAGTTTGTGGAGAACTCTGAGTGCA#....((((((((((.((((((((#)))))))).))))............................)))))).	1744	1792	0.923077	-21.6	0	9.28e-05	0.426	3.1747	2.92125	-10.282	18	48	8	CDS		0	0
hsa-miR-518f-5p	NM_001346897	EGFR	CTCTAGAGGGAAGCACTTTCTC#GGAATGTCAGCCGAGGCAGGGAATGCGTGGACAAGTGCAACCTTCTGGAGG#((((((((((..(((((((((.#.))).))))))..)))))))))).	1705	1756	1	-26.3	1	0.000503188	0.441	1.9315	3.44465	-10.1092	19	24	10	CDS		0	0
hsa-miR-520b-5p	NM_001346897	EGFR	CCTCTACAGGGAAGCGCTTTC#GGAAGCGCACGCTGCGGAGGC#(((((.(((.(..((((((((#)))))))).).))).))))).	2149	2170	0.846154	-23.9	0	7.86e-07	0.338	4.48332	3.51713	-11.717	17	21	8	CDS		0	0
hsa-miR-520b-3p	NM_001346897	EGFR	AAAGTGCTTCCTTTTAGAGGG#CCTTCTGGAGGGTGAGCCA#...(.((((((((((((((((#)))))))))))).))))).	1745	1764	0.923077	-20.7	0	0.000318202	0.471	3.44721	2.77874	-10.6336	17	19	12	CDS		0	0
hsa-miR-526a-5p	NM_001346897	EGFR	CTCTAGAGGGAAGCACTTTCTG#CGGAATGTCAGCCGAGGCAGGGAATGCGTGGACAAGTGCAACCTTCTGGAGG#((((((((((..(((((((((.#.))).))))))..)))))))))).	1704	1756	1	-26.6	1	0.000503188	0.441	1.97088	3.59802	-10.1092	19	24	10	CDS		0	0
hsa-miR-520c-5p	NM_001346897	EGFR	CTCTAGAGGGAAGCACTTTCTG#CGGAATGTCAGCCGAGGCAGGGAATGCGTGGACAAGTGCAACCTTCTGGAGG#((((((((((..(((((((((.#.))).))))))..)))))))))).	1704	1756	1	-26.6	1	0.000503188	0.441	1.97088	3.59802	-10.1092	19	24	10	CDS		0	0
hsa-miR-520c-3p	NM_001346897	EGFR	AAAGTGCTTCCTTTTAGAGGGT#ACCTTCTGGAGGGTGAGCCA#...(.(((((((((((((((((#))))))))))))).))))).	1744	1764	0.923077	-22.4	0	0.000318202	0.471	3.58978	2.89522	-10.6336	18	20	13	CDS		1	0
hsa-miR-518c-5p	NM_001346897	EGFR	TCTCTGGAGGGAAGCACTTTCTG#CAGTGTCCAAGCCAGGTGCTCCCTCCAGC#...((((((((.(((((((....#.))))))))))))))).	3465	3494	0.846154	-26.2	0	0.000104227	0.412	-1.20005	-0.643459	-9.86134	15	17	15	CDS		0	0
hsa-miR-518c-5p	NM_001346897	EGFR	TCTCTGGAGGGAAGCACTTTCTG#GGACAAGTGCAACCTTCTGGAGGG#(((((((((((..(((((((((.#))).))))))..))))))))))).	1733	1757	1	-25.7	1	0.000176703	0.441	2.72021	2.6946	-8.57351	20	24	11	CDS		0	0
hsa-miR-524-3p	NM_001346897	EGFR	GAAGGCGCTTCCCTTTGGAGT#CTCCAGAGGGGGAAACAGTGGCA#...(.(((((((((((((((.#))))))))))).....)))).).	3496	3519	0.923077	-23.3	0	0.00205718	0.426	-0.580089	-0.631368	-10.6336	16	23	11	CDS		0	0
hsa-miR-524-3p	NM_001346897	EGFR	GAAGGCGCTTCCCTTTGGAGT#CTCCAGAGGATGTTCAATAACTGTGAGGTGGTCCTTG#.(((((((((((((((((((.#)))))))))...............))))))..)))).	411	448	0.923077	-21.5	1	6.64e-05	0.529	3.25402	2.81817	-3.79332	19	37	9	CDS		0	0
hsa-miR-517-5p	NM_001346897	EGFR	CCTCTAGATGGAAGCACTGTCT#AGGCAGGGAATGCGTGGACAAGTGCAACCTTCTGGAGGG#((((((((.((..(((((((((#.))))).))))..)).)))))))).	1718	1757	0.846154	-28.3	1	0.000176703	0.441	0.907739	3.48223	-9.6299	19	25	8	CDS		0	1
hsa-miR-519d-5p	NM_001346897	EGFR	CCTCCAAAGGGAAGCGCTTTCTGTT#ACAGTGGAGCGAATTCCTTTGGAA#..((((((((((..((((((((((.#)))).))))))..)))))))))).	543	567	0.961538	-26.9	1	0.000377011	0.559	1.72567	4.24244	-7.10297	20	24	10	CDS		0	0
hsa-miR-519d-3p	NM_001346897	EGFR	CAAAGTGCCTCCCTTTAGAGTG#TTCTGGAGGGTGAGCCAAGGGAGTTTGT#((((.(.(((((((((((((..#)))))))))).......))).).)))).	1747	1775	0.846154	-19.5	0	0.0085633	0.456	3.43008	2.91232	-9.6003	18	28	10	CDS		1	0
hsa-miR-521	NM_001346897	EGFR	AACGCACTTCCCTTTAGAGTGT#ACCTTCTGGAGGGTGAGCCAAGGGAGTTTGTGGAGAACTCTGAGTGCA#...((((((((((((((((.((#)).))))))))))............................)))))).	1744	1792	0.846154	-19.1	0	9.28e-05	0.426	2.9652	2.91632	-6.51454	18	48	10	CDS		0	0
hsa-miR-520d-3p	NM_001346897	EGFR	AAAGTGCTTCTCTTTGGTGGGT#CCCATCAAGGAAGACAGCTTCTTG#.(((.((((((((((((((((.#))))))))))).)).)))..))).	3300	3324	0.923077	-21.6	0	3.71e-05	0.412	2.30679	2.49537	-7.91236	19	24	11	CDS		1	0
hsa-miR-520d-3p	NM_001346897	EGFR	AAAGTGCTTCTCTTTGGTGGGT#GCCTATCAAGTGGATGGCATTG#..(((((((((.((((((((((#)))))))))).))).)))))).	2753	2775	0.923077	-20.4	1	0.000209061	0.574	5.92346	4.71423	-8.3038	19	22	10	CDS		1	0
hsa-miR-520g-5p	NM_001346897	EGFR	TCTAGAGGAAGCACTTTCTGTTT#GGACAAGTGCAACCTTCTGGAG#((((((((..(((((((((....#))).))))))..))).))))).	1733	1755	0.846154	-19	1	0.00178819	0.426	3.20465	2.79325	-6.23647	17	22	6	CDS		0	0
hsa-miR-520g-5p	NM_001346897	EGFR	TCTAGAGGAAGCACTTTCTGTTT#ACAGCAGGGCTTCTTCA#....((((((((.(((.((((..#)))).))))))))))).	3182	3199	0.846154	-18.3	0	0.000385691	0.368	5.77292	3.71306	-10.8357	15	17	11	CDS		0	0
hsa-miR-520g-3p	NM_001346897	EGFR	ACAAAGTGCTTCCCTTTAGAGTGT#ACCTTCTGGAGGGTGAGCCAAGGGAGTTTGTG#(((((.(((((((((((((((.((#)).)))))))))).))))......).))))).	1744	1776	0.846154	-19.6	0	0.00964243	0.456	3.53066	2.90698	-5.83853	22	32	10	CDS		0	0
hsa-miR-516b-5p	NM_001346897	EGFR	ATCTGGAGGTAAGAAGCACTTT#TTTCTCAGCCTCCAGAG#.(((((((((.(((((......#)))))..))))))))).	402	419	0.923077	-18.7	1	0.00119223	0.544	2.55751	3.24955	-6.6181	14	17	9	CDS		0	0
hsa-miR-516b-5p	NM_001346897	EGFR	ATCTGGAGGTAAGAAGCACTTT#TGTTTGGGACCTCCGGT#..((((((((...(((((....#)))))...)))))))).	1564	1581	0.923077	-17.9	1	2.26e-05	0.632	1.52856	2.33431	-12.4177	13	17	8	CDS		0	0
hsa-miR-516b-3p	NM_001346897	EGFR	TGCTTCCTTTCAGAGGGT#ACCTTCTGGAGGGTGAGCC#.(((((((((((((((((#))))))))))))).)))).	1744	1763	0.923077	-24.3	1	0.000102443	0.456	3.58978	2.89522	-3.79332	17	19	13	CDS		0	0
hsa-miR-518e-5p	NM_001346897	EGFR	CTCTAGAGGGAAGCGCTTTCTG#CGGAATGTCAGCCGAGGCAGGGAATGCGTGGACAAGTGCAACCTTCTGGAGG#((((((((((..(((((((((.#.))).))))))..)))))))))).	1704	1756	1	-26.2	1	0.000503188	0.441	1.97088	3.59802	-10.1092	19	24	10	CDS		0	0
hsa-miR-518e-5p	NM_001346897	EGFR	CTCTAGAGGGAAGCGCTTTCTG#CAGTGGAGCGAATTCCTTTGGAA#.((((((((((..(((((((((#))).))))))..)))))))))).	544	567	1	-22.9	1	0.000377011	0.559	3.68913	3.8327	-8.42926	19	23	10	CDS		0	0
hsa-miR-518e-3p	NM_001346897	EGFR	AAAGCGCTTCCCTTCAGAGTG#TTCTGGAGGGTGAGCCAAGGGAGTTTGTGGAGAACTCTGAGTGCA#...((((((((((((((((..#))))))))))............................)))))).	1747	1792	0.923077	-20.4	0	9.28e-05	0.426	2.9652	2.91632	-6.51454	16	45	10	CDS		0	0
hsa-miR-518e-3p	NM_001346897	EGFR	AAAGCGCTTCCCTTCAGAGTG#CACATCGTTCGGAAGCGCA#...((((((((.....(((((#))).))....)))))))).	2139	2158	0.923077	-18.3	0	0.00331692	0.338	4.48332	3.51713	-12.9758	13	19	8	CDS		0	0
hsa-miR-518a-5p	NM_001346897	EGFR	CTGCAAAGGGAAGCCCTTTC#AGGGCTTCTTCAGCAGC#((((...((((((((((...#))))))))))..)))).	3187	3204	0.923077	-20.3	0	0.000151711	0.368	4.87334	3.88083	-11.5013	14	17	10	CDS		0	0
hsa-miR-518d-5p	NM_001346897	EGFR	CTCTAGAGGGAAGCACTTTCTG#CGGAATGTCAGCCGAGGCAGGGAATGCGTGGACAAGTGCAACCTTCTGGAGG#((((((((((..(((((((((.#.))).))))))..)))))))))).	1704	1756	1	-26.6	1	0.000503188	0.441	1.97088	3.59802	-10.1092	19	24	10	CDS		0	0
hsa-miR-518d-3p	NM_001346897	EGFR	CAAAGCGCTTCCCTTTGGAGC#CTCCAGAGGGGGAAACAGTGG#.....(((((((((((((((.#))))))))))).....)))).	3496	3517	0.846154	-20.7	0	0.000280332	0.441	-0.580089	-0.631368	-13.6656	15	21	11	CDS		0	0
hsa-miR-517c-3p	NM_001346897	EGFR	ATCGTGCATCCTTTTAGAGTGT#GCGCTCTGCCCGGCGAGTCGGGCTCTGGAGGAAAAGAAAGTTTGCCAAGGCACGAG#.((((((.((((((((((((((#))))))))..................)))))).................)))))).	309	365	0.923077	-18.5	1	0.000536823	0.485	-0.140284	1.40349	-6.10696	20	56	8	CDS		0	0
hsa-miR-520h	NM_001346897	EGFR	ACAAAGTGCTTCCCTTTAGAGT#TTCTGGAGGGTGAGCCAAGGGAGTTTGTG#(((((.(((((((((((((((.#)))))))))).))))......).))))).	1747	1776	0.846154	-19.2	0	0.00964243	0.456	3.53066	2.90698	-5.83853	20	29	10	CDS		0	0
hsa-miR-520h	NM_001346897	EGFR	ACAAAGTGCTTCCCTTTAGAGT#GCTCTGGAGGAAAAGAAAGTTTGCCAAGGCACG#.....((((((.((((((((((#))))))))))................)))))).	330	363	0.846154	-17.7	0	0.000800341	0.485	0.739302	1.44352	-17.0124	16	33	10	CDS		0	0
hsa-miR-522-5p	NM_001346897	EGFR	CTCTAGAGGGAAGCGCTTTCTG#CGGAATGTCAGCCGAGGCAGGGAATGCGTGGACAAGTGCAACCTTCTGGAGG#((((((((((..(((((((((.#.))).))))))..)))))))))).	1704	1756	1	-26.2	1	0.000503188	0.441	1.97088	3.59802	-10.1092	19	24	10	CDS		0	0
hsa-miR-522-5p	NM_001346897	EGFR	CTCTAGAGGGAAGCGCTTTCTG#CAGTGGAGCGAATTCCTTTGGAA#.((((((((((..(((((((((#))).))))))..)))))))))).	544	567	1	-22.9	1	0.000377011	0.559	3.68913	3.8327	-8.42926	19	23	10	CDS		0	0
hsa-miR-522-3p	NM_001346897	EGFR	AAAATGGTTCCCTTTAGAGTGT#ACCTTCTGGAGGGTGAGCCAA#....(((((((((((((((.((#)).))))))))))..))))).	1744	1765	0.948718	-18.5	0	0.000521374	0.485	3.72502	2.89229	-9.54656	17	21	10	CDS		0	0
hsa-miR-519a-5p	NM_001346897	EGFR	CTCTAGAGGGAAGCGCTTTCTG#CGGAATGTCAGCCGAGGCAGGGAATGCGTGGACAAGTGCAACCTTCTGGAGG#((((((((((..(((((((((.#.))).))))))..)))))))))).	1704	1756	1	-26.2	1	0.000503188	0.441	1.97088	3.59802	-10.1092	19	24	10	CDS		0	0
hsa-miR-519a-5p	NM_001346897	EGFR	CTCTAGAGGGAAGCGCTTTCTG#CAGTGGAGCGAATTCCTTTGGAA#.((((((((((..(((((((((#))).))))))..)))))))))).	544	567	1	-22.9	1	0.000377011	0.559	3.68913	3.8327	-8.42926	19	23	10	CDS		0	0
hsa-miR-519a-3p	NM_001346897	EGFR	AAAGTGCATCCTTTTAGAGTGT#GGATGCACTG#..(((((((((...........#))))))))).	2004	2014	0.846154	-16.4	1	0.000188747	0.426	1.95896	2.06237	-11.4183	9	10	9	CDS		0	0
hsa-miR-527	NM_001346897	EGFR	CTGCAAAGGGAAGCCCTTTC#AGGGCTTCTTCAGCAGC#((((...((((((((((...#))))))))))..)))).	3187	3204	0.923077	-20.3	0	0.000151711	0.368	4.87334	3.88083	-11.5013	14	17	10	CDS		0	0
hsa-miR-516a-3p	NM_001346897	EGFR	TGCTTCCTTTCAGAGGGT#ACCTTCTGGAGGGTGAGCC#.(((((((((((((((((#))))))))))))).)))).	1744	1763	0.923077	-24.3	1	0.000102443	0.456	3.58978	2.89522	-3.79332	17	19	13	CDS		0	0
hsa-miR-519a-2-5p	NM_001346897	EGFR	CCTCTACAGGGAAGCGCTTTC#GGAAGCGCACGCTGCGGAGGC#(((((.(((.(..((((((((#)))))))).).))).))))).	2149	2170	0.846154	-23.9	0	7.86e-07	0.338	4.48332	3.51713	-11.717	17	21	8	CDS		0	0
hsa-miR-500a-3p	NM_001346897	EGFR	ATGCACCTGGGCAAGGATTCTG#CAGTGTCCAAGCCAGGTGCT#..((((((.(((..((((.(((#))).))))..))))))))).	3465	3485	0.846154	-24.6	1	0.000822696	0.382	-1.50747	-0.61868	-8.15936	16	20	9	CDS		0	0
hsa-miR-501-3p	NM_001346897	EGFR	AATGCACCCGGGCAAGGATTCT#TGCTGGGGTGCAG#..(((((((.((((........#)))).))))))).	720	733	1	-21.9	1	6.85e-06	0.441	4.72388	3.44174	-7.16801	11	13	7	CDS		0	0
hsa-miR-502-5p	NM_001346897	EGFR	ATCCTTGCTATCTGGGTGCTA#TGGGGCCCGGAGCCCAGGGAC#.((((((...(((((((.(((#))).)))))))...)))))).	1671	1692	0.846154	-23.8	1	8.6e-06	0.279	3.80091	2.23995	-8.40586	16	21	7	CDS		0	0
hsa-miR-502-5p	NM_001346897	EGFR	ATCCTTGCTATCTGGGTGCTA#CACTGGGATGGTGGGGGC#.((((((((((((.((((...#)))).)))))))))))).	2066	2084	0.923077	-21.8	1	3.19e-06	0.324	4.46191	1.77184	-4.65016	16	18	12	CDS		0	0
hsa-miR-502-5p	NM_001346897	EGFR	ATCCTTGCTATCTGGGTGCTA#AGTGCCTATCAAGTGGATGGCATTGGAA#.(((.(((((((((((((((.#))))))).......))))))))..))).	2750	2778	0.923077	-20.7	0	0.000281296	0.574	7.13409	4.97988	-7.91236	18	28	8	CDS		0	0
hsa-miR-502-3p	NM_001346897	EGFR	AATGCACCTGGGCAAGGATTCA#ATCTGTGCCCAGCAGTGCT#...(((((((((((.((((...#)))).)))))))..)))).	765	784	0.846154	-21.6	0	7.4e-06	0.382	5.6154	3.87186	-7.24999	15	19	7	CDS		0	0
hsa-miR-450a-2-3p	NM_001346897	EGFR	ATTGGGGACATTTTGCATTCAT#GAGGGCAAATACAGCTTTGGTGCCACCTGCGTGAAGAAGTGTCCCCGT#..((((((((((((...(((((#.))))))))))))))))).	969	1017	0.846154	-20.6	1	0.00642297	0.471	5.52007	4.33934	-5.9255	17	19	17	CDS		0	0
hsa-miR-503-5p	NM_001346897	EGFR	TAGCAGCGGGAACAGTTCTGCAG#CTGTTCTCTCTGCTGG#((((((.((((((((........#)))))))).)))))).	3754	3770	0.846154	-20.8	0	0.00353509	0.588	-0.494708	-0.215765	-5.71431	14	16	8	3UTR		0	0
hsa-miR-503-3p	NM_001346897	EGFR	GGGGTATTGTTTCCGCTGCCAGG#CCTGGTGAGTGGCTTGTCTGGAAACAGTCCTGCTCCT#(((((((((((((((((((((((#)))))).))).........)))))))))...))))).	3393	3430	1	-25.9	1	0.00301361	0.397	0.83517	0.717469	-3.93757	23	37	9	CDS		0	0
hsa-miR-504-5p	NM_001346897	EGFR	AGACCCTGGTCTGCACTCTATC#TGGGGTGCAGGAGAGGA#....(((..(((((((((((..#)))))))))))..))).	723	740	0.923077	-20.6	0	0.000656959	0.471	4.11766	3.62894	-12.9166	14	17	11	CDS		0	0
hsa-miR-504-5p	NM_001346897	EGFR	AGACCCTGGTCTGCACTCTATC#GGTGTGTGCAGATCGCAAAGGGCA#.(.(((((((((((((..((((#)))).)))))))))....))))).	2575	2599	0.833333	-20.5	0	0.00046149	0.456	6.13162	4.793	-5.35086	18	24	9	CDS		0	0
hsa-miR-504-3p	NM_001346897	EGFR	GGGAGTGCAGGGCAGGGTTTC#GAAAACAGCTGCAAGGCCACAGGCCAGGTCTGCCATGCCTTGTGCTCCCC#((((((((((((((.(((...#.))).)))))))))))))).	1611	1661	0.846154	-30.7	1	5.58e-05	0.265	1.96331	2.95885	-4.67302	17	20	14	CDS		0	0
hsa-miR-505-5p	NM_001346897	EGFR	GGGAGCCAGGAAGTATTGATGT#ACACAAAGACAATATTGGCTCCCA#((((((((....((((((....#.)))))))))))))).	2537	2561	0.846154	-20.8	1	0.00775478	0.485	4.57523	5.37464	-12.408	14	16	14	CDS		0	0
hsa-miR-505-3p	NM_001346897	EGFR	CGTCAACACTTGCTGGTTTCCT#GGGGACCAGACAACTGTATCCAGTGTGCCCACTACATTGACGG#(((((((((((((((((((((.#))))))))).)).........)))))...........))))).	1846	1889	1	-22.3	1	0.000829992	0.397	3.11667	3.23023	-3.93757	21	43	9	CDS		0	0
hsa-miR-513a-3p	NM_001346897	EGFR	TAAATTTCACCTTTCTGAGAAGG#CCTTCTGGAGGGTGAGC#.....((((((((((..((((((#)))))))))))))))).	1745	1762	0.846154	-19.7	0	4.69e-05	0.441	4.45687	2.61513	-13.8986	16	17	16	CDS		0	1
hsa-miR-506-5p	NM_001346897	EGFR	TATTCAGGAAGGTGTTACTTAA#TGAGGACAGCATAGACGACACCTTCCTC#.....(((((((((((......#.))))))))))).	3359	3387	0.846154	-18.2	0	0.0382986	0.412	1.91139	2.70159	-13.6656	11	13	11	CDS		0	0
hsa-miR-506-3p	NM_001346897	EGFR	TAAGGCACCCTTCTGAGTAGA#CTGCTGCAGGAGAGGGAGCTTG#..((((.(((((((((((((.#))))).)))))).))..)))).	2169	2191	0.846154	-21.1	0	0.000340839	0.368	4.03272	4.15015	-6.50069	17	22	6	CDS		0	0
hsa-miR-508-5p	NM_001346897	EGFR	TACTCCAGAGGGCGTCACTCATG#GTGAGTGGCTTGTCTGGAA#...((((((.((.(((((((((.#))))))))))).)))))).	3397	3416	1	-24.7	0	1.31e-06	0.397	3.84387	0.568884	-9.04618	17	19	11	CDS		0	0
hsa-miR-508-5p	NM_001346897	EGFR	TACTCCAGAGGGCGTCACTCATG#CGTGGACAAGTGCAACCTTCTGGAGG#..((((((((((...((((((((#))))....))))...)))))))))).	1730	1756	0.923077	-23.1	1	0.000503188	0.441	2.91589	2.63718	-7.83842	18	26	10	CDS		0	0
hsa-miR-508-5p	NM_001346897	EGFR	TACTCCAGAGGGCGTCACTCATG#GGGTGACTCCTTCACACATACTCCTCCTCTGGAT#...(((((((((.(((((((...#))))))).................))))))))).	1256	1290	0.846154	-22.8	0	0.00041598	0.529	2.086	3.24208	-7.80367	16	34	9	CDS		0	0
hsa-miR-509-3p	NM_001346897	EGFR	TGATTGGTACGTCTGTGGGTAG#CCCACAGGCGCCT#.....((..((((((((((...#)))))))))))).	3342	3355	0.846154	-19.7	0	0.0103659	0.426	2.61193	2.63626	-17.0356	12	13	12	CDS		0	0
hsa-miR-510-5p	NM_001346897	EGFR	TACTCAGGAGAGTGGCAATCAC#CCAAGCTCTCTTGAGG#..(((((((((((((.......#))..))))))))))).	2225	2241	1	-18.7	1	0.000566143	0.559	4.44931	5.32659	-5.19005	13	16	11	CDS		0	0
hsa-miR-514a-5p	NM_001346897	EGFR	TACTCTGGAGAGTGACAATCATG#GTTGGGCACTTTTGAAGATCATTTTCTCAGCCTCCAGAGG#..((((((((..(((........#.)))..)))))))).	380	420	0.923077	-18.6	1	4.39e-05	0.544	0.751508	2.97733	-11.3616	11	15	8	CDS		0	0
hsa-miR-514a-3p	NM_001346897	EGFR	ATTGACACTTCTGTGAGTAGA#TGCCACCTGCGTGAAGAAGTGTCC#...(((((((((....((((.#.))))....))))))))).	989	1013	0.923077	-19.2	0	0.00427672	0.5	4.21781	4.5024	-9.62901	13	19	9	CDS		0	1
hsa-miR-532-5p	NM_001346897	EGFR	CATGCCTTGAGTGTAGGACCGT#GTGCCTGCCTCAGGCCATGA#((((.((((((.(((((((...#)).))))))))))).)))).	1808	1828	0.923077	-21.1	0	2.42e-05	0.382	4.02898	2.77084	-11.4034	17	20	11	CDS		0	0
hsa-miR-532-3p	NM_001346897	EGFR	CCTCCCACACCCAAGGCTTGCA#GCGAGTCGGGCTCTGGAGGA#(((((....(((..(((((((.#))))))))))....))))).	321	341	0.846154	-23.5	0	6.79e-05	0.397	-0.299638	1.3672	-12.8982	15	20	10	CDS		0	0
hsa-miR-532-3p	NM_001346897	EGFR	CCTCCCACACCCAAGGCTTGCA#GTGAGCCAAGGGAGTTTGTGGAGAA#..((((((((((..(((((((.#)))))))..)))....))))).)).	1756	1781	0.923077	-23.3	1	0.00594951	0.456	2.56356	3.10901	-7.10297	17	25	7	CDS		0	0
hsa-miR-455-5p	NM_001346897	EGFR	TATGTGCCTTTGGACTACATCG#GATGTGAACCCCGAGGGCAAATAC#(((.(((((((((..((((((.#))))))....))))))))).))).	957	981	0.948718	-20.5	0	0.00191379	0.456	3.59696	4.23733	-8.56189	18	24	9	CDS		0	0
hsa-miR-455-3p	NM_001346897	EGFR	GCAGTCCATGGGCATATACAC#TGTGCTCCCCCGAGGGCTGCTGGGGCCCGGAGCCCAGGGACTGCG#(((((((.(((((........#.))))).))))))).	1651	1696	1	-25.5	1	5.92e-05	0.265	1.94463	2.08631	-8.07655	12	15	7	CDS		0	0
hsa-miR-455-3p	NM_001346897	EGFR	GCAGTCCATGGGCATATACAC#ATGCCCTTCGGCTGCC#((((((...((((((......#))))))...)))))).	2502	2518	0.846154	-20.3	0	0.000192016	0.397	6.82428	4.78577	-9.08433	12	16	6	CDS		0	0
hsa-miR-544a	NM_001346897	EGFR	ATTCTGCATTTTTAGCAAGTTC#AGCTGTCCCAATGGGAGCTGCTGGGGTGCAGGAG#.(((((((.(((((((.(((((#.))))))))))))))))))).	702	736	0.923077	-20.2	1	7.08e-05	0.456	1.998	3.336	-4.84971	19	21	19	CDS		0	0
hsa-miR-544a	NM_001346897	EGFR	ATTCTGCATTTTTAGCAAGTTC#GGGCTGGCCAAACTGCTGGGTGCGGAAG#.((((((((..(((((.((((.#.))))))))))))))))).	2694	2722	1	-16.8	1	0.000218345	0.5	4.49373	5.64716	-7.86061	17	19	17	CDS		0	0
hsa-miR-376a-2-5p	NM_001346897	EGFR	GGTAGATTTTCCTTCTATGGT#GCTCTGGAGGAAAAGAAAGTTTGCCA#(((((((((((((((((.(((#))).))))))....))))))))))).	330	356	0.846154	-19.3	1	0.0394376	0.426	2.40408	1.26305	-3.93757	20	26	11	CDS		0	0
hsa-miR-376a-2-5p	NM_001346897	EGFR	GGTAGATTTTCCTTCTATGGT#ACCATGCAGAAGGAGGCAAAGTGCCT#((((...((((((((((((((#)))))..))))))))).....)))).	2731	2757	0.846154	-18.7	0	9.89e-06	0.588	5.86275	5.28124	-11.5013	18	26	9	CDS		0	0
hsa-miR-487b-5p	NM_001346897	EGFR	GTGGTTATCCCTGTCCTGTTCG#TGAACATCACCTGCACAGGACGGGGACCAGACAACT#((.(((.((((((((((((.((#.)).))))))))))))...))).)).	1825	1861	1	-24.5	0	0.000640643	0.441	3.22772	3.04654	-7.0388	19	26	12	CDS		0	0
hsa-miR-487b-5p	NM_001346897	EGFR	GTGGTTATCCCTGTCCTGTTCG#GCAGGAGAGGAGAACTGCCAG#.((((..(((((.((((((...#)))))).))).))...)))).	729	750	0.923077	-20.4	0	0.00730855	0.456	2.83219	3.69734	-8.5271	15	21	6	CDS		0	0
hsa-miR-551a	NM_001346897	EGFR	GCGACCCACTCTTGGTTTCCA#GGAAGCGCACGCTGCGGAGGCTGCTGCAGGAGAGGGAGCT#((..(((.((((((((((((.#.)))))).....)))))).))).)).	2149	2189	0.846154	-21.1	0	0.000784722	0.368	3.59062	3.77382	-10.8408	17	26	6	CDS		0	0
hsa-miR-552-3p	NM_001346897	EGFR	AACAGGTGACTGGTTAGACAA#CTGACCAAAATCATCTGTG#.((((((((.(((((((....#)))))))...)))))))).	753	772	0.807692	-19.7	1	0.0370619	0.397	4.19041	3.51663	-5.03583	15	19	8	CDS		0	0
hsa-miR-552-3p	NM_001346897	EGFR	AACAGGTGACTGGTTAGACAA#TTGGAGGACCGTCGCTTGG#..((((((((.((((...(((#)))...)))))))))))).	2607	2626	0.923077	-17.8	1	0.000213766	0.397	3.84252	5.55899	-8.01482	15	19	12	CDS		0	0
hsa-miR-552-3p	NM_001346897	EGFR	AACAGGTGACTGGTTAGACAA#AGCCAGTCTCCAGTG#.((.((.((((((((......#)))))))).)).)).	3455	3470	0.923077	-16.6	0	0.031559	0.382	-0.0472323	-0.77991	-8.60208	12	15	8	CDS		0	0
hsa-miR-554	NM_001346897	EGFR	GCTAGTCCTGACTCAGCCAGT#GCTGGCTGCGCTCTGCCCGGCGAGTCGGGCTCTGGA#.((((.(((((((((((((((#)))))))..............))))))))..)))).	302	338	0.846154	-26	0	2.88e-05	0.382	-0.291745	1.39645	-5.69428	19	36	8	CDS		0	0
hsa-miR-92b-5p	NM_001346897	EGFR	AGGGACGGGACGCGGTGCAGTG#GGTGCACCGCGACCTGGCAGCCA#.((..((((.(((((((((.(.#).))))))))).))))....)).	2624	2647	1	-27.7	0	1.85e-06	0.382	5.20578	5.84621	-12.1869	16	23	9	CDS		0	0
hsa-miR-92b-5p	NM_001346897	EGFR	AGGGACGGGACGCGGTGCAGTG#CGCTGCTGGCTGCGCTCTGCCCG#.(((.((((.((((((((((((#))))))..)))))).))))))).	298	321	0.846154	-27.3	0	2.5e-05	0.309	0.0119171	0.841497	-9.15487	19	23	7	CDS		0	0
hsa-miR-92b-3p	NM_001346897	EGFR	TATTGCACTCGTCCCGGCCTCC#GAGGCAGGGAATGCGTGGACAAGTGCAAC#..(((((((.(((((((((((.#)))))........)).)))).))))))).	1717	1746	1	-24.7	1	0.000488208	0.441	2.9684	3.30629	-6.19951	18	29	7	CDS		0	0
hsa-miR-557	NM_001346897	EGFR	GTTTGCACGGGTGGGCCTTGTCT#AGACGCCGGCCATGTGTGCCACCTGTGCC#....(((((((((((((.(((((#)))))..))))........))))))))).	1958	1987	0.846154	-25.4	0	3.05e-05	0.382	2.65864	3.45064	-9.54656	18	29	9	CDS		0	0
hsa-miR-557	NM_001346897	EGFR	GTTTGCACGGGTGGGCCTTGTCT#AGACGGCGTCCGCAAGTGTAAGA#.(((((((..((((((.((((((#)))))).))))))..))))))).	1085	1108	0.846154	-24.3	1	0.00855811	0.441	5.30623	3.69627	-6.09222	19	23	7	CDS		0	0
hsa-miR-567	NM_001346897	EGFR	AGTATGTTCTTCCAGGACAGAAC#CCTGGCAGCCAGGAACGTACTG#((((((((((((((((.......#))))).....))))))))))).	2636	2658	0.846154	-20.1	1	8.52e-06	0.412	4.98213	5.49602	-3.93757	16	22	11	CDS		0	0
hsa-miR-573	NM_001346897	EGFR	CTGAAGTGATGTGTAACTGATCAG#TGGTCAGTTTTCTCTTGCAGTCGTCAGCCTGAACATAACATCCTTGGGA#((.(((.(((((..(((((((((.#)))))))))............................)))))))).)).	1424	1473	0.923077	-18.6	0	0.00505829	0.515	3.34227	3.29887	-9.18477	19	49	9	CDS		0	1
hsa-miR-574-5p	NM_001346897	EGFR	TGAGTGTGTGTGTGTGAGTGTGT#GCACGAGTAACAAGCTCACGCAGTTGGGCACTTT#.((((((...(((((((((.(((#.))).))))))))).....)))))).	358	392	0.846154	-22.7	1	0.00158938	0.5	2.90834	1.67809	-8.40586	18	26	9	CDS		0	0
hsa-miR-574-5p	NM_001346897	EGFR	TGAGTGTGTGTGTGTGAGTGTGT#GCATTTAGGGGTGACTCCTTCACACATACTCC#.(((((((((((...((((....#.))))...))))))))))).	1248	1280	1	-22.5	1	0.0743263	0.471	3.44455	3.10244	-6.67474	15	20	11	CDS		0	0
hsa-miR-574-3p	NM_001346897	EGFR	CACGCTCATGCACACACCCACA#ATACACATCTGTGTGTGTGAGTGTT#.(((((((((((((((......#.))))))))))))))).	3665	3690	0.923077	-23.2	1	0.0160901	0.574	-0.758073	-0.289517	-3.79332	15	17	15	3UTR	MIRT054243	0	0
hsa-miR-575	NM_001346897	EGFR	GAGCCAGTTGGACAGGAGC#CCTGTTCTCTCTGCTGGCTCT#((((((((.(((((((...#))))))).....)))))))).	3753	3774	1	-23.5	1	0.00231297	0.603	0.147883	-0.155887	-4.99396	15	21	8	3UTR		0	0
hsa-miR-578	NM_001346897	EGFR	CTTCTTGTGCTCTAGGATTGT#GCTGTCCCAATGGGAGCTGCTGGGGTGCAGGAGA#.((((((((((((((.(....#.).)))))))))))))).	703	737	0.961538	-19.4	1	0.000127159	0.456	3.28393	3.09543	-4.02637	15	18	14	CDS		0	0
hsa-miR-579-5p	NM_001346897	EGFR	TCGCGGTTTGTGCCAGATGACG#CTGGCCAAACTGCT#..((((((((.(((((......#))))))))))))).	2697	2711	0.923077	-21.8	1	1.01e-05	0.5	4.02012	5.66062	-7.78178	13	14	13	CDS		0	0
hsa-miR-579-5p	NM_001346897	EGFR	TCGCGGTTTGTGCCAGATGACG#GTGCTCCGGGCGCTGCCGTGGC#(((((((..(((((.((..((.#))..))..))))).))))))).	779	801	0.846154	-22.1	1	1.4e-08	0.353	4.31052	4.83784	-8.04305	16	22	7	CDS		0	0
hsa-miR-581	NM_001346897	EGFR	TCTTGTGTTCTCTAGATCAGT#GCTGTCCCAATGGGAGCTGCTGGGGTGCAGGAGAG#((((.(((.((((((..((((#.)))))))))).))).)))).	703	738	0.846154	-19.1	0	0.000127266	0.456	2.31114	3.3401	-9.34605	17	21	10	CDS		0	0
hsa-miR-582-5p	NM_001346897	EGFR	TTACAGTTGTTCAACCAGTTACT#GGGAGAGCGACTGC#...(((((((((..((.......#))..))))))))).	856	870	0.846154	-16.9	0	0.000156972	0.338	4.77699	4.14909	-8.66051	11	14	9	CDS		0	0
hsa-miR-584-5p	NM_001346897	EGFR	TTATGGTTTGCCTGGGACTGAG#CAGTCTCCAGTGTCCAAGCCAG#...(((((((((((((((((..#))))).)))).)..))))))).	3458	3480	0.846154	-21.3	0	0.039095	0.368	-0.609611	-0.745766	-6.51454	17	22	7	CDS		0	0
hsa-miR-585-5p	NM_001346897	EGFR	CTAGCACACAGATACGCCCAGA#TGTGTGTGTATGTGTGTGTTT#..((((((((.((((((.((.(#).)).)))))).)))))))).	3717	3738	1	-20.6	1	0.161974	0.574	-0.282945	-0.304851	-7.78178	17	21	8	3UTR		0	0
hsa-miR-585-5p	NM_001346897	EGFR	CTAGCACACAGATACGCCCAGA#CTGGGCATCTGCCTCACCTCCACCGTGCA#...((((.(((((..((((((.#))))))))))).............)))).	2457	2486	0.846154	-18.9	0	0.00321747	0.338	5.56437	5.2887	-10.4205	15	29	11	CDS		0	0
hsa-miR-585-3p	NM_001346897	EGFR	TGGGCGTATCTGTATGCTA#GCATACAGTGCCACCCAG#((((.(((.((((((((..#)))))))))))..)))).	1789	1807	1	-20	0	0.00617959	0.456	3.09417	3.14305	-9.113	15	18	11	CDS		0	0
hsa-miR-585-3p	NM_001346897	EGFR	TGGGCGTATCTGTATGCTA#TAGACGCAGATAGTCGCCCAA#(((((((((((((......#.)))))))..)))))).	2983	3004	0.846154	-19.2	1	0.0269613	0.515	4.87965	5.42881	-5.76291	13	17	7	CDS		0	0
hsa-miR-548b-3p	NM_001346897	EGFR	CAAGAACCTCAGTTGCTTTTGT#GGGAGAGCGACTGCCTGGTCTG#..((.(((.(((((((((((.(#).)))))))))))...))))).	856	878	0.846154	-18.4	0	3.16e-05	0.338	4.04738	4.38689	-10.1324	17	22	11	CDS		0	0
hsa-miR-589-3p	NM_001346897	EGFR	TCAGAACAAATGCCGGTTCCCAGA#CTGGGGATCGGCCTCTTCATGCGAAGGCGCCACATCGTTCGGAA#((.((((....((((((((((((.#))))))))))))........................)))).)).	2109	2153	0.846154	-23.7	0	0.000615882	0.353	1.88894	3.06342	-12.9324	18	44	12	CDS		0	0
hsa-miR-589-3p	NM_001346897	EGFR	TCAGAACAAATGCCGGTTCCCAGA#TCTGGAGGGTGAGCCAAGGGAGTTTGTGGAGAACTCTGAG#(((((((((((.((((((((((((#))))).....)))))...)).)))))).......))))).	1748	1788	0.846154	-20.4	1	6.19e-06	0.412	3.51495	2.85791	-7.28438	23	40	6	CDS		0	0
hsa-miR-550a-5p	NM_001346897	EGFR	AGTGCCTGAGGGAGTAAGAGCCC#GGGTTTTTGCTGATTCAGGCT#...(((((((..(((((((((((#)))))))))))..))))))).	1332	1353	0.923077	-27.1	0	0.000295071	0.5	4.01738	3.50001	-12.6861	18	21	11	CDS		0	0
hsa-miR-550a-5p	NM_001346897	EGFR	AGTGCCTGAGGGAGTAAGAGCCC#GCTCAGACCCCACAGGCGCC#.(((((((.(((.((..((((..#))))..))))).))))))).	3334	3354	0.923077	-26.8	1	0.00978002	0.441	1.88877	2.71568	-6.37189	16	20	7	CDS		0	0
hsa-miR-550a-3p	NM_001346897	EGFR	TGTCTTACTCCCTCAGGCACAT#GTGCCCTGATGGATGAAGAAGACAT#((((((..(((.((((((((..#))))).))).))).....)))))).	3121	3146	0.846154	-21.2	0	0.00812585	0.441	3.50211	4.68898	-11.1417	17	25	6	CDS		0	0
hsa-miR-591	NM_001346897	EGFR	AGACCATGGGTTCTCATTGT#CAATGGGAGCTGCTGGG#...(((..(((((((((((.#)))))))))))..))).	710	727	0.923077	-19.6	0	0.000265009	0.456	2.74562	3.29465	-10.3719	14	17	11	CDS		0	0
hsa-miR-591	NM_001346897	EGFR	AGACCATGGGTTCTCATTGT#ATGGGAGAAAACAACACCCTGGTCTG#((((((.((((((((((...#)))))).........)))))))))).	1923	1949	0.923077	-18.3	0	0.000138125	0.382	2.89848	3.34866	-5.48126	16	26	10	CDS		0	0
hsa-miR-593-5p	NM_001346897	EGFR	AGGCACCAGCCAGGCATTGCTCAGC#GCTGCAGGCTGCACAGGCCCCCGGGAGAGCGACTGCCTGGTCTGCCG#.((((...((((((((((((((..(#.)..)))))).)))))))).)))).	834	881	0.846154	-29.4	0	2.7e-05	0.338	4.56389	3.95933	-9.55161	19	25	8	CDS		0	0
hsa-miR-593-3p	NM_001346897	EGFR	TGTCTCTGCTGGGGTTTCT#GGAGCCCAGGGACTGCGTCTCTTGCCGGAATGTCAGCCGAGGCAG#((((((.(((((.(((((.#.))))).))))).)))))).	1679	1724	0.846154	-22.6	0	1.59e-05	0.397	4.26342	3.35723	-6.77039	16	20	6	CDS		0	0
hsa-miR-596	NM_001346897	EGFR	AAGCCTGCCCGGCTCCTCGGG#CCCGGCGAGTCGGGCTCTGGAGGAAAAGAAAGTTTGCCAAGGCA#..(((((((((((((.(((((#))))).)))))))))........................)))).	317	361	1	-30.1	1	0.00150819	0.456	1.98337	0.982969	-5.19005	18	44	9	CDS		0	0
hsa-miR-596	NM_001346897	EGFR	AAGCCTGCCCGGCTCCTCGGG#CCCGAGGGCTGCTGGGGCCCGGAGCC#..(((((((((((((((((((#))))))))..))))))...))).)).	1659	1685	0.923077	-28.6	1	1.49e-08	0.309	4.01316	2.05369	-4.957	19	26	8	CDS		0	0
hsa-miR-597-5p	NM_001346897	EGFR	TGTGTCACTCGATGACCACTGT#CAGTGGCGATCTCCACATCCTGCCGGTGGCATTTAGGGGTGACT#...(((((((((((.((((((.#.))))))))))...))))))).	1220	1264	1	-22.1	0	0.000367195	0.441	1.9968	3.38256	-7.24999	17	22	10	CDS		0	0
hsa-miR-597-3p	NM_001346897	EGFR	TGGTTCTCTTGTGGCTCAAGCGT#AGGCTTGGCCTGAAAACAGGACGGACCT#.((((((((((((((.(((((.(#).)))))))).....)))))).))))).	1348	1376	0.923077	-24.2	1	0.00213922	0.529	3.75167	4.41928	-4.02637	20	28	8	CDS		0	0
hsa-miR-597-3p	NM_001346897	EGFR	TGGTTCTCTTGTGGCTCAAGCGT#GCAGGAGTCATGGGAGAAAACAA#((.((((((((((((((..((..#))..))))))))))))))..)).	1914	1937	0.923077	-23.4	0	0.00444061	0.397	3.96677	3.22131	-5.49511	18	23	14	CDS		0	0
hsa-miR-597-3p	NM_001346897	EGFR	TGGTTCTCTTGTGGCTCAAGCGT#TGCTGGGGTGCAGGAGAGGAGAACTGCCAG#(((((((((((((.(((.((((.#))))))).)))))))))........)))).	720	750	1	-22.6	1	0.00730855	0.456	2.72695	3.26018	-4.79441	20	30	9	CDS		0	0
hsa-miR-598-5p	NM_001346897	EGFR	GCGGTGATCCCGATGGTGTGAGC#CTTGGAGGACCGTCGCTTGGTGCACCGCG#((((((..(((((((((.(....#.).)))))))...))..)))))).	2606	2635	1	-25.8	0	4.54e-05	0.412	5.36694	5.36117	-7.7949	16	24	7	CDS		0	0
hsa-miR-600	NM_001346897	EGFR	ACTTACAGACAAGAGCCTTGCTC#CAGGGTTTTTGCTGA#.....(((.(((((((((((...#)))))))))))))).	1330	1345	1	-17.3	0	0.000639652	0.544	4.54918	3.28931	-14.722	14	15	14	CDS		0	0
hsa-miR-601	NM_001346897	EGFR	TGGTCTAGGATTGTTGGAGGAG#CTCCTCAACCTCCTCGACCC#.((((.((((..(((.((((((#))))))))).)))).)))).	3425	3445	0.846154	-21.9	0	0.148428	0.426	-0.653528	0.849402	-12.0989	17	20	9	CDS		0	0
hsa-miR-602	NM_001346897	EGFR	GACACGGGCGACAGCTGCGGCCC#GGGCCGACAGCTATGAGATGGAGGAAGACGGCGTCCGCAAGTGTA#.((((..((((((((((((((((#)))))).)))))....................))).))..)))).	1060	1105	0.923077	-29.1	0	0.000112623	0.441	3.20274	4.74281	-7.23797	20	45	6	CDS		0	0
hsa-miR-603	NM_001346897	EGFR	CACACACTGCAATTACTTTTGC#GCGAAGGGCCTTGCCGCAAAGTGTGTA#.(((((((((((...(((((((#)))))))...)))).....))))))).	1111	1138	0.846154	-19	1	0.00132733	0.559	4.78179	3.40511	-6.67474	18	27	7	CDS		0	0
hsa-miR-603	NM_001346897	EGFR	CACACACTGCAATTACTTTTGC#GTATGTGTGTGTGTGT#(((((((.(((..(((......#)))..)))))))))).	3710	3726	0.846154	-15.2	1	0.118521	0.588	-1.10079	-0.394668	-10.8871	13	16	10	3UTR		0	0
hsa-miR-605-5p	NM_001346897	EGFR	TAAATCCCATGGTGCCTTCTCCT#GGAGGGTGAGCCAAGGGAG#....((((.(((((((((((...#)))))))..)))).)))).	1751	1770	0.846154	-20.7	0	0.00298108	0.471	4.56563	2.78072	-10.603	15	19	7	CDS		0	0
hsa-miR-609	NM_001346897	EGFR	AGGGTGTTTCTCTCATCTCT#GAGATGGAGGAAGACG#...((.((((((.((((((.#)))))))))))).)).	1074	1090	0.923077	-19.4	0	0.00169959	0.397	4.88728	4.01275	-9.70463	14	16	12	CDS		0	0
hsa-miR-610	NM_001346897	EGFR	TGAGCTAAATGTGTGCTGGGA#TCCCAGTACCTGCTCAA#(((((.......(((((((((#)))))))))..))))).	2556	2573	0.846154	-19.8	0	0.000273881	0.5	4.58444	5.40188	-18.1663	14	17	9	CDS		0	0
hsa-miR-610	NM_001346897	EGFR	TGAGCTAAATGTGTGCTGGGA#CCGAGCCTGCACAAGCTCT#.(((((...((((((((.((.#)).)))..)))))))))).	3565	3584	0.846154	-19.8	0	2.28e-05	0.515	-1.31693	-0.605512	-8.70704	15	19	10	3UTR		0	0
hsa-miR-611	NM_001346897	EGFR	GCGAGGACCCCTCGGGGTCTGAC#CAGGCCCCCGGGAGAGCGACTGCCTGGTCTGCCGCA#(((.((((((((.((((((((..#)))))))).))).............)))))..))).	847	883	1	-29.2	0	5.22e-05	0.338	4.72758	4.07209	-8.25873	19	36	8	CDS		0	0
hsa-miR-611	NM_001346897	EGFR	GCGAGGACCCCTCGGGGTCTGAC#TCAGCCTCCAGAGGATGTTCAATAACTGTGAGGTGGTCCTTGG#.((((((((((((((((.((((.#)))))))).....................)))).)))))))).	406	449	0.846154	-28	1	1.92e-05	0.544	3.10271	2.68292	-3.79332	20	43	8	CDS		0	0
hsa-miR-611	NM_001346897	EGFR	GCGAGGACCCCTCGGGGTCTGAC#TCAGACCCCACAGGCGCCTTGA#.(((((.(.(((.(((((((((.#)))))))))..))).)))))).	3336	3358	1	-27.9	0	0.0174226	0.426	4.06021	2.1713	-7.68253	18	22	9	CDS		0	0
hsa-miR-612	NM_001346897	EGFR	GCTGGGCAGGGCTTCTGAGCTCCTT#AGGGAGCTTGTGGAGCCTCTTACACCCAGTG#((((((.((((((((((((((((((#)))))))))).)))))).))....)))))).	2181	2212	0.846154	-32.9	0	0.00102832	0.426	4.94879	4.17247	-5.48126	24	31	10	CDS		0	0
hsa-miR-612	NM_001346897	EGFR	GCTGGGCAGGGCTTCTGAGCTCCTT#GAGGGCTGCTGGGGCCCGGAGCCCAGG#.((((((.(((((((.((((.((((#))))))).).)))))))...)))))).	1662	1689	0.923077	-32.7	1	4.76e-07	0.294	7.45721	2.16777	-6.34001	21	27	7	CDS		0	0
hsa-miR-612	NM_001346897	EGFR	GCTGGGCAGGGCTTCTGAGCTCCTT#GGGGAGCAGCGATGCGACCCTCCGGGACGGCCGGGGCAGCGCTCCTGGCGCTGCTGGCTGCGCTCTGCCCGGCG#(((((((((((((((((.((((((.#.))))..))))))).........................)))))))))))).	250	324	0.923077	-32.3	1	1.48e-06	0.338	-0.0728599	0.0688094	-3.93757	23	52	12	5UTR		0	0
hsa-miR-614	NM_001346897	EGFR	GAACGCCTGTTCTTGCCAGGTGG#TCACCTGCACAGGACGGGG#.....((((((((((.(((((((#))))))))).)))))))).	1831	1850	0.846154	-22.8	0	5.31e-05	0.412	3.59643	3.12699	-13.8986	17	19	9	CDS		0	0
hsa-miR-614	NM_001346897	EGFR	GAACGCCTGTTCTTGCCAGGTGG#CAGCTGCAAGGCCACAGGCC#....(((((((((((.(((.((.#)).))))))))..)))))).	1616	1636	0.846154	-21.5	0	7.77e-08	0.412	1.13702	2.58537	-9.77961	16	20	8	CDS		0	0
hsa-miR-615-5p	NM_001346897	EGFR	GGGGGTCCCCGGTGCTCGGATC#GTCCGAGCCTGTGGGGCCGACA#(..(((((((((.((((((((.#))))))))))).))))))..).	1047	1069	0.923077	-31.9	0	4.15e-06	0.338	2.60443	4.55052	-7.94792	18	22	11	CDS		0	0
hsa-miR-615-5p	NM_001346897	EGFR	GGGGGTCCCCGGTGCTCGGATC#CCGAGGGCTGCTGGGGCCCG#..(((((((((((.(((((...#))))).))))..))))))).	1660	1680	0.923077	-30.6	1	7.12e-09	0.294	7.03317	2.12673	-5.81384	16	20	7	CDS		0	0
hsa-miR-615-3p	NM_001346897	EGFR	TCCGAGCCTGGGTCTCCCTCTT#AGGGTTTTTGCTGATTCAGGCTTGGC#.(((((((((((((.((((...#))))........))))))))))))).	1331	1357	0.846154	-24.1	1	0.000293514	0.529	4.3663	3.6499	-4.52877	17	26	13	CDS		0	0
hsa-miR-616-3p	NM_001346897	EGFR	AGTCATTGGAGGGTTTGAGCAG#GCTCAGACCCCACAGGCGCCTTGACTG#((((((((..((((((((((..#))))))))))..)))......))))).	3334	3361	0.923077	-25.3	1	0.00030612	0.412	4.33347	2.14824	-6.23647	18	27	10	CDS		0	0
hsa-miR-616-3p	NM_001346897	EGFR	AGTCATTGGAGGGTTTGAGCAG#TGCTCCGGGCGCTGCCGTGGCAAGTCCCCCAGTGACTG#(((((((((.(((((((.((((#.)))).....)))).)))))))))))).	780	818	0.923077	-24.1	1	0.00116398	0.324	1.71797	4.44078	-5.18008	20	28	12	CDS		0	0
hsa-miR-619-5p	NM_001346897	EGFR	GCTGGGATTACAGGCATGAGCC#GGCTCGTGCGTCCGAGCCTGTGGGGCCGACAGCT#((((((.(((((((((((((((#)))))))........))))))))..))..)))).	1038	1072	0.923077	-26.7	0	0.00113356	0.353	3.92317	4.6402	-5.48126	21	34	8	CDS		0	0
hsa-miR-619-5p	NM_001346897	EGFR	GCTGGGATTACAGGCATGAGCC#GGCTCCGGTGCGTTCGGCACGGTGTATAAGGGACTCTGGATCCCAGA#.((((((((.((((((((((((#)))))..))))........................))))))))))).	2280	2327	0.846154	-23.7	1	5.44e-05	0.5	5.70191	5.4935	-5.03583	20	47	11	CDS		0	0
hsa-miR-619-3p	NM_001346897	EGFR	GACCTGGACATGTTTGTGCCCAGT#ACTGGGCCAGGTCTTGAAGGCTGTCCAA#....((((((.(((((.(((((((#)))))))))).........)))))))).	2010	2038	0.846154	-21.6	0	0.000369959	0.397	1.48662	2.46268	-12.3713	18	28	10	CDS		0	0
hsa-miR-622	NM_001346897	EGFR	ACAGTCTGCTGAGGTTGGAGC#TTCCTATGCCTTAGCAGTCTT#..((.((((((((((.((((.#))))...)))))))))).)).	605	626	1	-21.9	0	0.0134064	0.662	2.24616	2.86282	-9.30909	16	21	10	CDS		0	0
hsa-miR-623	NM_001346897	EGFR	ATCCCTTGCAGGGGCTGTTGGGT#CCCAGCGCTACCTTGTCATTCAGGGGGATG#(((((((((((((..(((((((.#)))))))...))))))......))))))).	3049	3079	0.846154	-25.7	1	4.99e-06	0.456	5.93179	4.18182	-5.52986	20	30	7	CDS		0	0
hsa-miR-623	NM_001346897	EGFR	ATCCCTTGCAGGGGCTGTTGGGT#GCCCGGAGCCCAGGGACTGCGTCTCTTGCCGGAATGTCAGCCGAGGCAGGGAA#.(((((((((((((((.((((((#))))))))))).....)))))..........................))))).	1675	1728	0.846154	-25.5	1	3.25e-05	0.397	2.47249	2.83184	-3.79332	21	53	11	CDS		0	0
hsa-miR-624-5p	NM_001346897	EGFR	TAGTACCAGTACCTTGTGTTCA#TGTAACGGAATAGGTATTGGTGA#...(((((((((((..((((((#)).))))....))))))))))).	1134	1157	0.846154	-17.4	0	0.00988993	0.588	3.88415	3.75482	-7.48304	17	23	11	CDS		0	0
hsa-miR-624-3p	NM_001346897	EGFR	CACAAGGTATTGGTATTACCT#CCAGTGCCTGGTGA#(((.(((((((((........#))))))))).))).	3387	3401	0.846154	-17	0	6.66e-06	0.426	2.58005	0.780233	-8.79494	12	14	9	CDS		0	0
hsa-miR-625-3p	NM_001346897	EGFR	GACTATAGAACTTTCCCCCTCA#GAGGGGGAAACAGTGGCA#(.((((.....((((((((((.#))))))))))..))))).	3501	3519	0.923077	-20	0	0.00205718	0.426	-0.29829	-0.674415	-14.0822	15	18	10	CDS		0	0
hsa-miR-627-3p	NM_001346897	EGFR	TCTTTTCTTTGAGACTCACT#AGTCGGGCTCTGGAGGAAAAGAA#((((((((((.(((((((((#))).))).))).)))))))))).	324	347	0.846154	-19.1	1	0.0076286	0.426	1.93211	1.1506	-6.76235	19	23	10	CDS		0	0
hsa-miR-629-5p	NM_001346897	EGFR	TGGGTTTACGTTGGGAGAACT#CTCCCAACCAAGCTCT#.((((((..((((((((....#)))))))).)))))).	2218	2234	0.923077	-19.1	1	0.000725391	0.515	5.67889	4.99342	-7.16335	14	16	8	CDS		0	0
hsa-miR-629-5p	NM_001346897	EGFR	TGGGTTTACGTTGGGAGAACT#GTGATGGCCAGCGTGGACAACCCC#.(((((((((((((....((.#)).....))))))))...))))).	2418	2442	0.846154	-18	1	0.000379409	0.353	5.66936	5.61027	-4.76182	15	24	8	CDS		0	0
hsa-miR-629-3p	NM_001346897	EGFR	GTTCTCCCAACGTAAGCCCAGC#GCTGGGGTGCAGGAGAGGAGAACT#((((((((..(...(.((((((#)))))).)...)..).))))))).	721	745	0.923077	-25.1	1	0.00509361	0.441	1.28102	3.52732	-11.9623	16	24	7	CDS		0	0
hsa-miR-629-3p	NM_001346897	EGFR	GTTCTCCCAACGTAAGCCCAGC#GCTGGGCTCCGGTGCGTTCGGCACGGTGTATAAGGGACT#(((((((.((((((((((((((#))))))))....)))))).))............))))).	2276	2315	0.923077	-24.8	1	0.00130629	0.456	5.4256	5.52151	-6.25121	21	39	8	CDS		0	0
hsa-miR-629-3p	NM_001346897	EGFR	GTTCTCCCAACGTAAGCCCAGC#GCTGCACAGGCCCCCGGGAGAGCG#((((((((.......(((((((#))))....)))....)))))))).	841	865	0.846154	-20.5	1	0.00063624	0.338	2.62021	4.33333	-15.2895	15	24	8	CDS		0	0
hsa-miR-630	NM_001346897	EGFR	AGTATTCTGTACCAGGGAAGGT#CCCTGGTCTGGAAGTACG#.((((((((.(((((((.....#))))))).))))).))).	1939	1957	0.884615	-18.7	1	2.54e-05	0.412	5.85822	3.16219	-5.03583	15	18	7	CDS		0	0
hsa-miR-631	NM_001346897	EGFR	AGACCTGGCCCAGACCTCAGC#CTGGGCCAGGTCTT#(((((((((((((........#))))))))))))).	2011	2025	0.846154	-28.3	1	2.47e-05	0.456	3.26391	2.38559	-5.76291	13	14	13	CDS		0	0
hsa-miR-631	NM_001346897	EGFR	AGACCTGGCCCAGACCTCAGC#GCTGCAAGGCCACAGGCCAGGTCTG#((((((((((....(((((((#))))..))).....)))))))))).	1618	1643	0.846154	-27	1	1.72e-06	0.368	0.30398	2.70756	-12.2551	17	25	10	CDS		0	0
hsa-miR-33b-5p	NM_001346897	EGFR	GTGCATTGCTGTTGCATTGC#GCGATGCGACCCTCCGGGACGGCCGGGGCAGCGCT#((((..((((((((((((((#))))))))))................)))))))).	258	293	0.846154	-20.4	0	7.5e-07	0.221	-0.0291997	-0.235419	-9.95757	18	35	10	5UTR		0	0
hsa-miR-33b-3p	NM_001346897	EGFR	CAGTGCCTCGGCAGTGCAGCCC#GGCTGCGCTCTGCCCGGCGAGTCGGGCTCTGG#(((.(((.(((((((((((((.#)))))))))...........))))))).))).	305	337	1	-29.7	0	2.04e-05	0.368	-0.445348	1.44297	-9.28323	19	32	9	CDS		0	0
hsa-miR-33b-3p	NM_001346897	EGFR	CAGTGCCTCGGCAGTGCAGCCC#GGCTGCACAGGCCCCCGGGAGAGCGACTGC#((((((((((((.((((((((.#))))))))..))).....))).)).)))).	840	870	0.846154	-29.4	1	0.000156972	0.338	4.21167	3.97122	-5.22671	20	30	8	CDS		0	0
hsa-miR-33b-3p	NM_001346897	EGFR	CAGTGCCTCGGCAGTGCAGCCC#GGGACTGCGTCTCTTGCCGGAATGTCAGCCGAGGCAGGGA#(..(((((((((((((((((((#))).))))).))...............)))))))))..).	1687	1727	0.846154	-28.9	0	2.31e-05	0.397	2.62277	3.6177	-6.65879	20	40	9	CDS		0	0
hsa-miR-632	NM_001346897	EGFR	GTGTCTGCTTCCTGTGGGA#TCTCCAGAGGGGGAAACAGTGGCAGATTTGCAGACACA#(((((((((((((.(((((#)).))).))))).................)))))))).	3495	3533	0.846154	-23	1	0.00230137	0.5	-0.570986	-0.797763	-4.79441	18	38	8	CDS		0	0
hsa-miR-632	NM_001346897	EGFR	GTGTCTGCTTCCTGTGGGA#CCCACAGGCGCCTTGACTGAGGACAGCATAGACGACACC#(((((((((.((((((((.#))))))))................)))).....))))).	3342	3381	0.923077	-21.4	1	0.100898	0.397	1.65454	1.95739	-5.18008	17	39	8	CDS		0	0
hsa-miR-632	NM_001346897	EGFR	GTGTCTGCTTCCTGTGGGA#TCCACAGGAACTGGATATT#(((((((.((((((((((.#)))))))))).))))))).	1289	1308	0.846154	-21.8	1	0.00185628	0.559	3.78485	3.33889	-6.25121	17	19	10	CDS		0	0
hsa-miR-633	NM_001346897	EGFR	CTAATAGTATCTACCACAATAAA#GTGGTGGATGCC#......(((((((((((......#))))))))))).	3153	3165	1	-18.5	0	0.00061025	0.441	3.64446	4.10373	-15.5666	11	12	11	CDS		0	0
hsa-miR-636	NM_001346897	EGFR	TGTGCTTGCTCGTCCCGCCCGCA#TGCGACCCTCCGGGACGGCCGGGGCAGCGCTCCTGGCGCT#.((((.(((((...(((((((..#.)))).)))...))))))))).	262	302	0.846154	-25.8	0	3.7e-08	0.191	0.819417	-0.282153	-11.1871	16	22	9	CDS		0	1
hsa-miR-637	NM_001346897	EGFR	ACTGGGGGCTTTCGGGCTCTGCGT#GGCCCGAGACCCCCAGC#.(((((((.(((((((((......#)))))))))))))))).	3038	3055	1	-31.2	1	0.00817313	0.485	6.57116	4.80974	-4.84971	16	17	16	CDS		0	0
hsa-miR-637	NM_001346897	EGFR	ACTGGGGGCTTTCGGGCTCTGCGT#TGCAGGCTGCACAGGCCCCCGGG#.((((((((((...(((.(((((.#))))))))....)))))))))).	836	859	1	-31.3	1	0.00014272	0.338	3.19249	3.98967	-9.2861	18	23	10	CDS		0	0
hsa-miR-637	NM_001346897	EGFR	ACTGGGGGCTTTCGGGCTCTGCGT#GCAGTGCTCCGGGCGCTGCCGTGGCAAGTCCCCCAGTG#(((((((((((((((((.((((..#)))).)).)))).............))).)))))))).	776	814	0.846154	-31.6	1	0.000178211	0.324	3.09877	3.94811	-3.93757	21	38	8	CDS		0	0
hsa-miR-638	NM_001346897	EGFR	AGGGATCGCGGGCGGGTGGCGGCCT#GTCGGCGTCCGCCCGAGTCCCC#.((((.(.((((((((((.((((..#)))).)))))))))).))))).	145	167	0.923077	-33.6	0	0.00161767	0.235	-0.542523	-0.1286	-8.00792	19	22	10	5UTR		0	0
hsa-miR-639	NM_001346897	EGFR	ATCGCTGCGGTTGCGAGCGCTGT#CGGCGCAGCGCGGCCGCAGCA#...((((((((((((.((((((.#))))))..)))))))))))).	18	39	0.820513	-35.5	0	8.67e-05	0.176	-0.0559038	-0.14696	-6.74759	18	21	12	5UTR		0	0
hsa-miR-640	NM_001346897	EGFR	ATGATCCAGGAACCTGCCTCT#GAGGCAGGGAATGCGTGGACAA#.((.((((.(..((((((((.#)))))))).....).)))))).	1717	1739	1	-23.7	0	0.00408468	0.397	1.879	3.56204	-14.0533	15	22	8	CDS		0	0
hsa-miR-641	NM_001346897	EGFR	AAAGACATAGGATAGAGTCACCTC#GGGGTGACTCCTTCA#..........((..((((((((((#))))))))))..)).	1255	1270	0.923077	-19.2	0	0.000338997	0.456	3.80464	3.05173	-23.8687	12	15	10	CDS		0	0
hsa-miR-641	NM_001346897	EGFR	AAAGACATAGGATAGAGTCACCTC#TGGCTCTATCTTGACCTGTG#....((((((((((((((((....#)))))))))))))...))).	3767	3787	0.923077	-17.9	0	0.00644499	0.647	0.052186	-0.148585	-9.54656	16	20	13	3UTR		0	0
hsa-miR-642a-5p	NM_001346897	EGFR	GTCCCTCTCCAAATGTGTCTTG#AAGGCGCCACATCGTTCGGAAGCGCACGCTGCGGAGGCTGCTGCAGGAGAGGGAG#.(((((((((....(((((((.#.))))).))....))))))))).	2132	2187	0.923077	-23.6	1	0.000150553	0.353	3.30723	3.30138	-12.1109	16	23	9	CDS		0	0
hsa-miR-642a-3p	NM_001346897	EGFR	AGACACATTTGGAGAGGGAACC#CCAGTCTCCAGTGTCC#.(((((...((((((.((....#))..))))))))))).	3457	3473	0.923077	-16.9	0	0.0885582	0.368	-0.414425	-0.786315	-8.94009	13	16	11	CDS		0	1
hsa-miR-644a	NM_001346897	EGFR	AGTGTGGCTTTCTTAGAGC#GTTCGGAAGCGCACGCTG#((((((((((((...((((#)))))))))).)))))).	2145	2163	0.846154	-17.4	1	0.000198918	0.368	3.32576	3.81204	-6.81899	16	18	10	CDS		0	0
hsa-miR-645	NM_001346897	EGFR	TCTAGGCTGGTACTGCTGA#TCAGCAGCAGCCAGTCTC#...((((((((.(((((((#)))))))..)))))))).	3447	3465	0.807692	-22.7	0	0.0193867	0.368	-0.0856595	-0.799124	-9.86134	15	18	8	CDS		0	0
hsa-miR-646	NM_001346897	EGFR	AAGCAGCTGCCTCTGAGGC#GCAACAGAGGTGAAAACAGCTGCA#..(((((((((((((..((#))..))))))......))))))).	1600	1624	0.846154	-23.6	1	0.000330574	0.515	1.3672	2.48254	-5.19005	15	24	7	CDS		0	0
hsa-miR-646	NM_001346897	EGFR	AAGCAGCTGCCTCTGAGGC#GCCACATCGTTCGGAAGCGCACGCTGCGGAGGCTGCTGCA#..(((((.(((((((.(((#.))).))))))).))))).	2137	2177	0.846154	-27.5	0	8.39e-07	0.368	2.82546	3.17631	-7.50368	15	19	7	CDS		0	0
hsa-miR-647	NM_001346897	EGFR	GTGGCTGCACTCACTTCCTTC#AAGGGAGTTTGTGGAGAACTCTGAGTGCATACAGTGCCACC#((((((((((((((((((((.#))))))))..............)))))))......))))).	1763	1804	0.923077	-24.3	1	0.000663438	0.441	2.73361	2.80765	-3.93757	20	41	8	CDS		0	0
hsa-miR-650	NM_001346897	EGFR	AGGAGGCAGCGCTCTCAGGAC#CCCAGAGTGCCTGCCTCA#..(((((((((((((..((..#)).))))))).)))))).	1802	1820	0.846154	-24.2	1	1.43e-05	0.397	3.51388	2.9084	-5.19005	15	18	7	CDS		0	0
hsa-miR-652-5p	NM_001346897	EGFR	CAACCCTAGGAGAGGGTGCCATTCA#GGATGGTGGGGGCCCTCCTCTTGCTGCTGGTGGTGGCCCTGGGGA#...(((((((.(((((((((((((.#)))))))....))))))....................))))))).	2071	2116	0.846154	-28.3	0	1.2e-05	0.324	4.11437	1.95038	-9.33931	20	45	7	CDS		0	0
hsa-miR-449b-3p	NM_001346897	EGFR	CAGCCACAACTACCCTGCCACT#GGTGAGCCAAGGGAGTTTGTGGA#...((((((((.((((((((((#)))).))..)))))))).)))).	1755	1778	0.846154	-21.1	0	0.0163469	0.441	3.64367	2.92846	-9.86134	18	23	8	CDS		0	0
hsa-miR-449b-3p	NM_001346897	EGFR	CAGCCACAACTACCCTGCCACT#GGCAGGGAATGCGTGGA#...((((.....(((((((...#))))))).....)))).	1719	1736	1	-21.5	0	0.000179785	0.412	0.350856	3.45299	-17.2986	11	17	7	CDS		0	0
hsa-miR-653-3p	NM_001346897	EGFR	TTCACTGGAGTTTGTTTCAATA#TGGAGCGAATTCCTTTGGAA#((((..(((((((((((((...#)))))))))))))..)))).	547	567	0.846154	-19.7	0	0.000377011	0.559	2.81835	3.95569	-9.95757	17	20	13	CDS		0	0
hsa-miR-411-5p	NM_001346897	EGFR	TAGTAGACCGTATAGCGTACG#GTGCGTTCGGCACGGTGTATA#..(((.(((((..(((((((.#)))))))....))))).))).	2287	2308	0.846154	-18.2	0	0.00943429	0.441	6.25048	5.73353	-11.4939	15	21	7	CDS		0	0
hsa-miR-654-3p	NM_001346897	EGFR	TATGTCTGCTGACCATCACCTT#GTGATGGCCAGCGTGGACAA#..(((((((((.(((((((...#))))))).))))..))))).	2418	2438	0.846154	-22.8	1	2.64e-06	0.382	5.57442	5.47288	-8.3038	16	20	7	CDS		0	0
hsa-miR-655-5p	NM_001346897	EGFR	AGAGGTTATCCGTGTTATGTTC#GAACATAACATCCTTGGGATTACGCTCC#.(((((.(((((((((((((((#))))))))))).....)))).)).))).	1454	1482	0.846154	-20.3	0	3.63e-05	0.529	2.35716	3.77884	-5.33701	20	28	11	CDS		0	0
hsa-miR-656-5p	NM_001346897	EGFR	AGGTTGCCTGTGAGGTGTTCA#AGACCCCACAGGCGCCTT#(((.((((((((.(((.(...#).))).))))))))))).	3338	3356	1	-21.7	0	0.0210221	0.426	2.46334	2.63242	-8.25873	15	18	11	CDS		0	0
hsa-miR-656-3p	NM_001346897	EGFR	AATATTATACAGTCAACCTCT#GGGGTGACTGTTTGGG#....(((.((((((.(((((.#))))))))))).))).	2826	2842	0.923077	-15.6	0	0.000307734	0.5	4.87161	5.408	-12.5956	14	16	11	CDS		0	0
hsa-miR-549a-5p	NM_001346897	EGFR	AGCTCATCCATAGTTGTCACTG#AGTGCAACCTTCTGGAGGGTGAGCC#.((((((((.((((((.((((.#))))))))....))..)))))))).	1738	1763	0.923077	-19.5	1	0.000102443	0.456	4.61261	2.73608	-5.03583	18	25	8	CDS		0	0
hsa-miR-657	NM_001346897	EGFR	GGCAGGTTCTCACCCTCTCTAGG#CTGGGATGGTGGGGGCCCTCCT#((..((((((((((.((.((((.#)))))).))))))))))..)).	2068	2090	0.846154	-25.5	0	3.83e-08	0.309	4.01255	1.76355	-9.26259	18	22	10	CDS		0	1
hsa-miR-657	NM_001346897	EGFR	GGCAGGTTCTCACCCTCTCTAGG#CCTTCTGGAGGGTGAGCCAAGGGAGTTTGTGGAGAACTCTGAGTGCATACAGTGCCACCCAGAGTGCCTGCCT#((((((((((((((((((..(((#)))...)))))))))..................))..............................))))))).	1745	1818	0.923077	-24.7	1	1.78e-05	0.426	3.23913	2.8204	-3.93757	21	73	9	CDS		0	1
hsa-miR-657	NM_001346897	EGFR	GGCAGGTTCTCACCCTCTCTAGG#CTGGGGTGCAGGAGAGGAGAACTGCCA#((((.((((((.((((((((((.#))))))...))).)..)))))))))).	722	749	0.923077	-24.9	0	0.00725094	0.441	4.20796	3.56834	-11.4034	20	27	10	CDS		0	1
hsa-miR-659-3p	NM_001346897	EGFR	CTTGGTTCAGGGAGGGTCCCCA#TGGGGGCCCTCCTCTTGCTG#...(((...(((((((((((((#)))))))))))))...))).	2077	2097	0.846154	-30	0	0.0117312	0.324	3.52948	2.14788	-11.4283	16	20	13	CDS		0	0
hsa-miR-660-5p	NM_001346897	EGFR	TACCCATTGCATATCGGAGTTG#GGCTCCGGTGCGTTCGGCACGGTGTATAAGGGA#..(((..((((((((((((((.#)))))))))............)))))...))).	2280	2313	0.846154	-17.8	0	0.00694447	0.441	5.55258	5.56248	-8.40165	17	33	9	CDS		0	0
hsa-miR-660-3p	NM_001346897	EGFR	ACCTCCTGTGTGCATGGATTA#AATACCATGCAGAAGGAGGC#.((((((.(.((((((((((.#))).))))))).))))))).	2728	2748	0.846154	-22.9	1	0.00011242	0.5	5.87553	5.53779	-7.34947	17	20	7	CDS		0	0
hsa-miR-421	NM_001346897	EGFR	ATCAACAGACATTAATTGGGCGC#CGCCCAAAGTTCCGTGAGTTGATC#((((((..((.....(((((((.#)))))))......))..)))))).	2997	3021	0.884615	-17.9	0	0.00125711	0.5	4.20505	5.90725	-16.8479	15	24	7	CDS		1	0
hsa-miR-542-5p	NM_001346897	EGFR	TCGGGGATCATCATGTCACGAGA#TCTGTGTATGTGTGTGTGTGTATGTGTGTGTTTGTGACAGATTTGATCCCTGT#.(((((((((...(((((((((.#.)))))))))....))))))))).	3705	3758	0.923077	-26.8	1	0.00384154	0.544	-0.497142	-0.46915	-11.254	18	24	9	3UTR	MIRT006330	0	0
hsa-miR-542-5p	NM_001346897	EGFR	TCGGGGATCATCATGTCACGAGA#CTGCGTGAAGAAGTGTCCCCGT#.((((((.(((....(((((((.#)).)))))....))))))))).	995	1017	0.876923	-21.2	1	0.00642297	0.471	4.69102	4.64597	-12.3352	16	22	9	CDS	MIRT006330	0	0
hsa-miR-758-5p	NM_001346897	EGFR	GATGGTTGACCAGAGAGCACAC#GTCACGGACTCCCCTCCTGAGCTCTCTGAGTGCAACCAGCA#(.((((((((((((((((.((.#.)).)))))))).)).)))))).).	3212	3253	0.846154	-25.3	1	0.000645389	0.456	2.89402	3.37672	-5.10125	19	25	8	CDS		0	0
hsa-miR-758-3p	NM_001346897	EGFR	TTTGTGACCTGGTCCACTAACC#GGATGCACTGGGCCAGGTCTTGAAG#(((..(((((((((((......#.)))))))))))..))).	2004	2029	0.846154	-22.2	0	6.17e-05	0.426	3.18238	2.07195	-11.0886	14	18	11	CDS		0	0
hsa-miR-671-5p	NM_001346897	EGFR	AGGAAGCCCTGGAGGGGCTGGAG#CTCCGGGACGGCCGGGGCAGCGCTCCTG#((((.(((((((..(..((((((#))))))..)..))))))).....)))).	269	297	0.846154	-28.1	0	1.51e-08	0.206	-0.808299	-0.147516	-10.4356	18	28	7	CDS		0	1
hsa-miR-671-3p	NM_001346897	EGFR	TCCGGTTCTCAGGGCTCCACC#GGTGGGGGCCCTCCTCTTGCTGCTGGTGGTGGCCCTGGGGATCGGC#.((((((((((((((((((((#.))))).))))))))))))))).	2075	2121	0.923077	-36.3	1	1.02e-06	0.338	2.58496	2.07441	-3.79332	20	23	15	CDS		0	0
hsa-miR-668-5p	NM_001346897	EGFR	TGCGCCTCGGGTGAGCATG#CAGCTCAGACCCCACAGGCGCC#.((((((.((((((((.((#))))))..))))...)))))).	3332	3354	0.846154	-22.1	1	0.00978002	0.441	4.33347	2.14824	-6.10696	16	22	6	CDS		0	0
hsa-miR-668-3p	NM_001346897	EGFR	TGTCACTCGGCTCGGCCCACTAC#GTGGTGGATGCCGACGAGTACC#.((.(((((..((((((((((((#)))))))..)))))))))))).	3153	3175	1	-23.8	0	0.000671977	0.426	3.47388	4.05927	-10.8926	19	22	12	CDS		0	0
hsa-miR-550a-3-5p	NM_001346897	EGFR	AGTGCCTGAGGGAGTAAGAG#CTCAGACCCCACAGGCGCC#.(((((((.(((.((..(((#)))..))))).))))))).	3335	3354	0.923077	-22.6	1	0.00978002	0.441	1.88877	2.71568	-6.37189	15	19	7	CDS		0	0
hsa-miR-550a-3-5p	NM_001346897	EGFR	AGTGCCTGAGGGAGTAAGAG#CTCCCTCAGCCACC#.(((.(((((((((......#))))))))).))).	2922	2936	0.923077	-21.1	0	0.042045	0.485	4.23703	5.67526	-8.88086	12	14	9	CDS		0	0
hsa-miR-767-5p	NM_001346897	EGFR	TGCACCATGGTTGTCTGAGCATG#TGCTGCCACAACCAGTGTGCT#.((((..(((((((...((((..#))))...)))))))..)))).	816	837	0.923077	-21.5	0	0.000186567	0.324	3.78023	3.94671	-8.20647	15	21	7	CDS		0	0
hsa-miR-767-3p	NM_001346897	EGFR	TCTGCTCATACCCCATGGTTTCT#GGGAGCTGCTGGGGTGCAGGAGAGGAGAA#(((.(((.(((((((((((((((#)))))))).))))))).....))).))).	714	743	0.923077	-23.6	0	0.00156977	0.456	4.32347	3.46175	-9.28323	21	29	8	CDS		0	1
hsa-miR-1224-5p	NM_001346897	EGFR	GTGAGGACTCGGGAGGTGG#CGTCCGCCCGAGTCCCCGCC#(((.(((((((((.((((.#)).)).))))))))).))).	150	170	0.876923	-26.5	0	0.00423544	0.235	-0.5356	-0.104121	-7.82644	16	20	9	5UTR		0	0
hsa-miR-1224-3p	NM_001346897	EGFR	CCCCACCTCCTCTCTCCTCAG#CTGCGGAGGCTGCTGCAGGAGAGGGAGCTTGTGGA#..((((((((.((((((((((#.))).)))))))))))...)))).	2160	2195	0.948718	-26.5	1	1.74e-05	0.368	3.43991	3.83823	-7.78178	18	24	11	CDS		0	0
hsa-miR-1224-3p	NM_001346897	EGFR	CCCCACCTCCTCTCTCCTCAG#CTGGGGTGCAGGAGAGGAGA#......(((((((((((((((#))))))....))))))))).	722	742	0.846154	-23.3	0	0.00128743	0.456	3.40998	3.14906	-15.5666	15	20	9	CDS		0	0
hsa-miR-320b	NM_001346897	EGFR	AAAAGCTGGGTTGAGAGGGCAA#TGCGCTCTGCCCGGCG#....(((((((..((((.(((.#))).))))))))))).	308	324	0.846154	-24.1	0	1.48e-06	0.338	-0.681133	1.32127	-14.1825	14	16	11	CDS		0	0
hsa-miR-320b	NM_001346897	EGFR	AAAAGCTGGGTTGAGAGGGCAA#CCTCTTACACCCAGTG#....((((((((((((((....#))))))).))))))).	2196	2212	0.923077	-22	0	0.00102832	0.426	4.99342	4.42593	-9.54656	14	16	7	CDS		0	0
hsa-miR-320b	NM_001346897	EGFR	AAAAGCTGGGTTGAGAGGGCAA#TGCTCCTCAACCTCCTCGACCCACTCAGCA#....(((((((((((.(((((.#)))))))))))).............)))).	3423	3453	0.923077	-21.7	0	0.0762233	0.412	-0.632179	0.484344	-9.77961	16	30	12	CDS		0	0
hsa-miR-320c	NM_001346897	EGFR	AAAAGCTGGGTTGAGAGGGT#AGCCTCTTACACCCAGTG#....((((((((((((((.(#).))))))).))))))).	2194	2212	0.846154	-21.6	0	0.00102832	0.426	4.99342	4.42593	-9.54656	15	18	7	CDS		0	0
hsa-miR-320c	NM_001346897	EGFR	AAAAGCTGGGTTGAGAGGGT#ACCCACTCAGCAGCAGCC#....((((.((((((.((((#)))).))))))..)))).	3441	3459	0.846154	-20.5	0	0.0317318	0.368	0.166252	-0.311099	-10.836	14	18	6	CDS		0	0
hsa-miR-1296-3p	NM_001346897	EGFR	GAGTGGGGCTTCGACCCTAACC#GGGATGGTGGGGGCCCTCCTCT#(((.((((((((.(((....((#))...))).)))))))).))).	2070	2092	0.826923	-25.1	0	1.75e-07	0.294	2.92244	2.0013	-8.25873	16	22	8	CDS		0	0
hsa-miR-1468-5p	NM_001346897	EGFR	CTCCGTTTGCCTGTTTCGCTG#CGGCGAGTCGGGCTCTGGAGG#(((((...(((((.(((((((#))))))).)))))..))))).	319	340	0.846154	-24.4	0	4.87e-05	0.397	-0.630267	1.38325	-10.5527	17	21	7	CDS		0	0
hsa-miR-1468-5p	NM_001346897	EGFR	CTCCGTTTGCCTGTTTCGCTG#CAGCCGAGGCAGGGAATGCGTGGA#((.(((((.((((((((((((#)))).)))))))).)).))).)).	1712	1736	0.980769	-21.6	0	0.000179785	0.412	2.05569	3.52102	-6.5515	19	24	8	CDS		0	0
hsa-miR-1468-5p	NM_001346897	EGFR	CTCCGTTTGCCTGTTTCGCTG#CAGTGAAGGGCGTAAGGAGC#((((...(((((..(((((((#))))))))))))...)))).	3531	3551	0.923077	-20.8	0	0.0166223	0.485	-1.30108	-0.893292	-13.6472	16	20	12	CDS		0	0
hsa-miR-1323	NM_001346897	EGFR	TCAAAACTGAGGGGCATTTTCT#ATGCCCTTCGGC#......(((((((((((.....#))))))))))).	2502	2514	0.846154	-18.4	0	6.96e-05	0.397	5.01981	4.90678	-15.5666	11	12	11	CDS		0	0
hsa-miR-1271-5p	NM_001346897	EGFR	CTTGGCACCTAGCAAGCACTCA#GTGCTCCCCCGAGGGCTGCTGGGGCCCGGA#((.(((.((((((.(((.(((.#.))).)))))))))))).)).	1652	1682	0.846154	-25.3	0	7.73e-09	0.294	1.39775	2.04083	-7.89564	17	21	12	CDS		0	0
hsa-miR-1271-5p	NM_001346897	EGFR	CTTGGCACCTAGCAAGCACTCA#TGGGCTGGCCAAACTGCTGGGTGCGGAA#.((.((((((((((.((.((((#))))...)).....)))))))))).)).	2693	2721	1	-22	0	0.00021355	0.5	3.63235	5.8333	-7.5608	18	28	10	CDS		0	0
hsa-miR-1271-3p	NM_001346897	EGFR	AGTGCCTGCTATGTGCCAGGCA#TGCCAAGGCACGAGTAACAAGCTCACGCAGTTGGGCACTT#((((((((((.((((((.((((#))))..))))))))).................))))))).	351	391	1	-24.7	1	0.00217404	0.485	2.24534	1.90441	-6.76235	20	40	9	CDS		0	0
hsa-miR-1185-5p	NM_001346897	EGFR	AGAGGATACCCTTTGTATGTT#GTGCGAAGGGCCTTG#.((((...((((((((((...#)))))))))))))).	1109	1124	0.846154	-16.8	0	0.0001506	0.471	4.83242	3.3703	-9.55161	14	15	14	CDS		0	0
hsa-miR-1185-2-3p	NM_001346897	EGFR	ATATACAGGGGGAGACTCTCAT#GAGATCTCCTCCA#.......((((((((.((((..#)))))))))))).	2889	2902	0.923077	-20.4	0	0.00102167	0.426	3.07302	5.2994	-17.3433	12	13	12	CDS		0	0
hsa-miR-449c-5p	NM_001346897	EGFR	TAGGCAGTGTATTGCTAGCGGCTGT#GCGCTGCTGGCTGCGCTCTGCCC#..(((((.((...(((((((((.((#)))))))))))...)).))))).	297	320	0.923077	-27.8	0	9.49e-06	0.294	0.552369	0.567393	-14.7313	18	23	11	CDS		0	0
hsa-miR-449c-5p	NM_001346897	EGFR	TAGGCAGTGTATTGCTAGCGGCTGT#GGAGCTGCTGGGGTGCAGGAGAGGAGAACTGCCA#..(((((((((((.(((((((((.(#).))))))))))))))...........)))))).	715	749	0.923077	-25.9	1	0.00725094	0.441	3.09843	3.30959	-5.81384	21	34	14	CDS		0	0
hsa-miR-449c-3p	NM_001346897	EGFR	TTGCTAGTTGCACTCCTCTCTGT#GAGTGCAACCAGCAAC#(((((.(((((((((........#))))))))).))))).	3239	3255	1	-21.4	0	0.00112198	0.471	3.25797	2.82859	-6.07158	14	16	9	CDS		0	0
hsa-miR-769-5p	NM_001346897	EGFR	TGAGACCTCTGGGTTCTGAGCT#GCTCCCCCGAGGGCTGCTGGGGCCCGGAGCCCAGGGACTGCGTCTCT#.(((((((((((((((((.(((#.))).)))))))))))).....))))).	1654	1701	1	-30.7	1	1.02e-05	0.309	4.37876	1.9897	-3.79332	20	28	12	CDS		0	0
hsa-miR-769-3p	NM_001346897	EGFR	CTGGGATCTCCGGGGTCTTGGTT#GCTGGGGCCCGGAGCCCAGG#(((((..((((.((((((((((.#))))))))))))))))))).	1669	1689	0.846154	-28.7	0	4.76e-07	0.294	7.27346	2.27806	-10.729	19	20	19	CDS		0	0
hsa-miR-769-3p	NM_001346897	EGFR	CTGGGATCTCCGGGGTCTTGGTT#GATCAAAGTGCTGGGCTCCGGTGCGTTCGGCACGGTGTATAAGGGACTCTGGATCCCAGA#(((((((((((((((((.((((.#.)))))))))))).............................))))))))).	2267	2327	0.923077	-28.5	1	5.44e-05	0.5	5.63414	5.54769	-3.93757	21	52	12	CDS		0	0
hsa-miR-766-5p	NM_001346897	EGFR	AGGAGGAATTGGTGCTGGTCTT#GAGTGCAACCAGCAACAATTCCACCG#.((.(((((((.(((((((...#.))))))).))))))).)).	3239	3265	0.846154	-24.6	0	0.0566985	0.5	3.07452	2.86616	-10.1722	16	20	7	CDS		0	0
hsa-miR-766-5p	NM_001346897	EGFR	AGGAGGAATTGGTGCTGGTCTT#GCCAGCGAGATCTCCTCCA#.(((((((((..(((((((...#))))))).))).)))))).	2883	2902	1	-22.2	1	0.00102167	0.426	3.41503	5.35253	-9.9649	16	19	7	CDS		0	0
hsa-miR-766-3p	NM_001346897	EGFR	ACTCCAGCCCCACAGCCTCAGC#GAGCCTGTGGGGCCGACAGCTATGAGATGGAGG#.((((((((((((((.(((...#))).)))))))))..............))))).	1051	1084	0.846154	-29.1	1	0.0390419	0.382	3.37573	4.37013	-4.02637	17	33	9	CDS		0	0
hsa-miR-378d	NM_001346897	EGFR	ACTGGACTTGGAGTCAGAAA#CTGACTCCGTCCAGTA#(((((((..((((((((...#))))))))))))))).	205	221	0.923077	-25.3	1	0.0102711	0.338	-0.0151058	-0.305519	-7.3076	15	16	15	5UTR		0	0
hsa-miR-1185-1-3p	NM_001346897	EGFR	ATATACAGGGGGAGACTCTTAT#GAGATCTCCTCCA#.......((((((((.((((..#)))))))))))).	2889	2902	0.923077	-17.8	0	0.00102167	0.426	3.07302	5.2994	-17.3433	12	13	12	CDS		0	0
hsa-miR-762	NM_001346897	EGFR	GGGGCTGGGGCCGGGGCCGAGC#GCTAGCCCCGGCGGCCGCCGCCG#(((((.((.((((((((..(((#))).))))))))..))))).)).	97	120	0.846154	-33.9	0	1.15e-09	0.191	-0.304407	-0.306632	-6.89492	18	23	8	5UTR		0	0
hsa-miR-670-5p	NM_001346897	EGFR	GTCCCTGAGTGTATGTGGTG#CATCACCTGCACAGGACGGGGACC#(((((((.(((((.((((((#)))))).)))))....))))))).	1829	1853	0.923077	-23.5	1	4.09e-05	0.426	3.56008	3.21681	-7.10805	18	24	7	CDS		0	0
hsa-miR-670-5p	NM_001346897	EGFR	GTCCCTGAGTGTATGTGGTG#GCCGGTGGCATTTAGGGGT#.(((((((((((...((((.#))))...))))))))))).	1241	1260	1	-20.9	1	3.45e-06	0.441	2.46863	3.06929	-6.67474	15	19	11	CDS		0	0
hsa-miR-1298-5p	NM_001346897	EGFR	TTCATTCGGCTGTCCAGATGTA#ATCGGGAGAGCCGGAGCGAGC#(((.(((((((.(((.(((...#))).))).)))))))..))).	224	245	0.846154	-20.6	0	1.63e-06	0.353	-0.464952	-0.167545	-10.5494	16	21	7	5UTR		0	0
hsa-miR-2113	NM_001346897	EGFR	ATTTGTGCTTGGCTCTGTCAC#TGACCGAGCCTGCACAAGC#.(((((((..(((((.((((.#)))).))))).))))))).	3562	3581	0.826923	-23.2	1	3.68e-05	0.529	-1.65158	-0.565539	-6.32527	16	19	7	3UTR		0	0
hsa-miR-2113	NM_001346897	EGFR	ATTTGTGCTTGGCTCTGTCAC#GCGGCAGGACCAAGCAACAT#...(((((((((.((((((.(#).)))))).))))))).)).	1405	1425	0.846154	-19.5	0	4.42e-05	0.5	4.70617	3.06442	-7.80367	16	20	7	CDS		0	0
hsa-miR-761	NM_001346897	EGFR	GCAGCAGGGTGAAACTGACACA#TGGTCAGTTTTCTCTTGCA#...((((((.(((((((((.((#))))))))))).)))))).	1424	1443	0.923077	-20.4	0	0.00227366	0.471	3.29317	3.47528	-7.75705	17	19	11	CDS		0	0
hsa-miR-761	NM_001346897	EGFR	GCAGCAGGGTGAAACTGACACA#TGTGTTTGTGACAGATTTGATCCCTGTTCTCTCTGCTGG#.((((((((.(((((.((((((#)))))).)).................))).)))))))).	3731	3770	0.846154	-20.1	1	0.00353509	0.588	0.00183943	-0.20116	-5.26888	19	39	8	3UTR		0	0
hsa-miR-764	NM_001346897	EGFR	GCAGGTGCTCACTTGTCCTCCT#GAGGGCAAATACAGCTTTGGTGCCACCTGCG#(((((((..(((((((((((..#)))))))...........)))).))))))).	969	1000	0.923077	-25.6	1	0.000790132	0.471	4.87376	4.21148	-7.3076	18	31	7	CDS		0	0
hsa-miR-764	NM_001346897	EGFR	GCAGGTGCTCACTTGTCCTCCT#AGGGGGATGAAAGAATGCATTTGCC#((((((((((..((((((((((#))))))))))..))..)))))))).	3070	3095	0.923077	-24.1	1	0.0866904	0.529	6.92221	4.19576	-10.1092	20	25	10	CDS		0	0
hsa-miR-764	NM_001346897	EGFR	GCAGGTGCTCACTTGTCCTCCT#GAGGACAGCATAGACGACACCTTCCTCCCAGTGCCTGGTGAGTGGCTTGTCTGGAAACAGTCCTGCT#((((((((((((((((((((..#))))))).............................)))))))).................))))).	3360	3427	0.846154	-23.4	1	0.00186347	0.412	1.63968	1.5475	-3.93757	20	67	8	CDS		0	0
hsa-miR-759	NM_001346897	EGFR	GCAGAGTGCAAACAATTTTGAC#CGGGACGGCCGGGGCAGCGCTCCTGGCGCTGCTGGCTGCGCTCTGCC#((((((((((..((........#.))..)))))))))).	272	319	0.846154	-20.8	1	1.94e-07	0.294	-0.898587	-0.138615	-11.0777	12	16	10	CDS		0	0
hsa-miR-765	NM_001346897	EGFR	TGGAGGAGAAGGAAGGTGATG#ATCATTTTCTCAGCCTCCAG#((((((....((((((((((.#))))))))))...)))))).	397	417	1	-20.5	0	0.00156589	0.544	3.59647	3.32775	-10.0938	16	20	10	CDS		0	0
hsa-miR-770-5p	NM_001346897	EGFR	TCCAGTACCACGTGTCAGGGCCA#GGCCTTGCCGCAAAGTGTGTAACGGAATAGGTATTGGT#.((((((((..(((.(((((((.#))))))).)))..................)))))))).	1117	1155	1	-24.4	1	0.00932372	0.559	3.31017	3.8197	-8.59606	18	38	8	CDS		0	0
hsa-miR-675-5p	NM_001346897	EGFR	TGGTGCGGAGAGGGCCCACAGTG#GGTGGGGGCCCTCCTCTTGCTGCTG#.((((((((((((((((.((.(.#).)).)))))))).))).)).))).	2075	2100	0.923077	-25.8	1	0.00889659	0.338	2.33775	2.02339	-3.79332	19	25	8	CDS		0	0
hsa-miR-675-3p	NM_001346897	EGFR	CTGTATGCCCTCACCGCTCA#TGGGCCTAAGATCCCGTCCATCGCCACTGGGATGGTGGGGGCC#......((((((((((((((#.)))).)))))))))).	2042	2085	0.923077	-23.3	0	4.26e-06	0.324	1.83683	3.10767	-15.5666	14	17	10	CDS		0	0
hsa-miR-298	NM_001346897	EGFR	AGCAGAAGCAGGGAGGTTCTCCCA#GGGAGAGCGACTGCCTGGTCTGCC#.(((((..((((.((((((((((.#))))))))..)).)))).))))).	856	880	0.923077	-31.5	0	0.000172424	0.338	3.32911	4.226	-8.93978	19	24	8	CDS		0	0
hsa-miR-298	NM_001346897	EGFR	AGCAGAAGCAGGGAGGTTCTCCCA#TGGTGGGGGCCCTCCTCTTGCTGCTG#((((((((.((((.((((((((((#))).))))))).))))))).))))).	2074	2100	0.846154	-27.5	1	0.00889659	0.338	4.19209	1.82463	-5.8508	22	26	7	CDS		0	0
hsa-miR-300	NM_001346897	EGFR	TATACAAGGGCAGACTCTCTCT#GAAGGAGCTGCCCATGA#....((.((((((.((((.((.#)).)))))))))).)).	656	673	1	-20	0	0.0248685	0.559	2.71071	2.30078	-11.9471	14	17	10	CDS		0	0
hsa-miR-300	NM_001346897	EGFR	TATACAAGGGCAGACTCTCTCT#AGAGGTGAAAACAGCTGCAAGGCCACAGGCCAGGTCTGCCATGCCTTGTGC#..((((((((((((((......#.))))))))....)))))).	1605	1656	0.846154	-18.5	1	0.000722091	0.279	1.15722	2.63192	-4.957	14	20	8	CDS		0	0
hsa-miR-892a	NM_001346897	EGFR	CACTGTGTCCTTTCTGCGTAG#CTGCTGGGTGCGGAAGAGAAAGAATACCATGCAGAAGGAGGCAAAGTGC#((((.((((((((((((((..#.)))))))))).)))).)))).	2706	2755	0.884615	-23.1	0	5.56e-05	0.559	3.59289	6.111	-8.05661	18	22	10	CDS		0	0
hsa-miR-892a	NM_001346897	EGFR	CACTGTGTCCTTTCTGCGTAG#GCAGATTTGCAGACACAGTGA#(((((((((...(((((....#)))))......))))))))).	3516	3537	0.923077	-21.8	1	0.00220148	0.485	-0.957989	-0.919844	-11.3517	14	21	9	CDS		0	0
hsa-miR-892a	NM_001346897	EGFR	CACTGTGTCCTTTCTGCGTAG#CTGCACAGGACGGGGACCAGA#..(((.((((((((((.((((#)))).)))))..)))))))).	1835	1856	0.846154	-19.9	0	0.000172275	0.456	3.19234	3.36104	-6.85796	17	21	8	CDS		0	0
hsa-miR-450b-3p	NM_001346897	EGFR	TTGGGATCATTTTGCATCCATA#ATGGGCTGCAAAGCTGTCCCAT#.((((((..((((((((((((.#))))).)))))))..)))))).	3283	3305	0.923077	-21.4	1	7.68e-07	0.515	2.75696	2.98454	-7.16335	18	22	7	CDS		0	0
hsa-miR-874-5p	NM_001346897	EGFR	CGGCCCCACGCACCAGGGTAAGA#TCTTGCTGCTGGTGGTGGCCCTGGGGATCGGCCT#.((((((((.(((((((((((((#))))))).))))))))))...........)))).	2089	2123	0.923077	-29.4	1	9.47e-06	0.353	2.08039	2.25092	-5.03583	21	34	10	CDS		0	0
hsa-miR-874-5p	NM_001346897	EGFR	CGGCCCCACGCACCAGGGTAAGA#CCCGTAATTATGTGGTGACAGATCACGGCTCGTGCGTCCGAGCCTGTGGGGCCGA#(((((((((((((..((((....#.))))))))..........))))))))).	1012	1067	0.846154	-27	1	2.99e-06	0.353	5.05698	4.17245	-5.52986	17	29	9	CDS		0	0
hsa-miR-888-3p	NM_001346897	EGFR	GACTGACACCTCTTTGGGTGAA#TCTCCAGAGGGGGAAACAGTG#.((((...((((((((((.((.#))))))))))))....)))).	3495	3516	0.923077	-20.1	0	0.00150751	0.426	-0.247054	-0.596803	-9.55161	16	21	12	CDS		0	0
hsa-miR-892b	NM_001346897	EGFR	CACTGGCTCCTTTCTGGGTAGA#CTGCCCGGCAGGAGTCATGG#((.((((((((..((((((((.#)))))))).)))))))))).	1907	1927	0.846154	-26.4	0	1.65e-06	0.397	4.17036	3.27892	-10.131	18	20	10	CDS		0	0
hsa-miR-541-5p	NM_001346897	EGFR	AAAGGATTCTGCTGTCGGTCCCACT#GTGGGGCCGACAGCTATGAGATGGAGGAAGACGGCGTCCG#...((((.((((((((((((((((.#))))))))))))))..................)).)))).	1057	1097	0.807692	-33.3	0	4.17e-05	0.397	3.58662	4.73657	-8.82818	20	40	14	CDS		0	0
hsa-miR-541-3p	NM_001346897	EGFR	TGGTGGGCACAGAATCTGGACT#GGACCAGACAACTGTATCCAGTGTGCCCACTAC#(((((((((((....(((((..#.)))))))))))))))).	1848	1881	0.923077	-25.6	1	0.000535674	0.397	2.67912	3.34769	-10.1658	16	18	16	CDS		0	0
hsa-miR-541-3p	NM_001346897	EGFR	TGGTGGGCACAGAATCTGGACT#AGATCACAGATTTTGGGCTGGCCAA#((((.(((.(((((((((((((#)).)).))))))))).))).)))).	2680	2705	0.846154	-24.3	0	0.000179018	0.485	6.03985	4.97029	-9.113	20	25	9	CDS		0	0
hsa-miR-889-5p	NM_001346897	EGFR	AATGGCTGTCCGTAGTATGGTC#GGCCATGTGTGCCACCTGTGCCATCCAAACTGCACCTACGGATGCACTGGGCCAG#..((((((((((((((((((((#)))))))............................))))))))......))))).	1965	2020	0.846154	-21.8	1	0.000821712	0.426	2.99146	2.55761	-4.957	20	55	8	CDS		0	0
hsa-miR-876-5p	NM_001346897	EGFR	TGGATTTCTTTGTGAATCACCA#GGTGAGCCAAGGGAGTTTG#.(((((((((((.(..(((((.#))))).)))))))))))).	1755	1774	0.923077	-17.8	1	0.00729363	0.471	3.32241	2.93815	-6.05095	17	19	12	CDS		0	0
hsa-miR-876-5p	NM_001346897	EGFR	TGGATTTCTTTGTGAATCACCA#ACAAGGAAATCCT#.((((((((((((.........#)))))))))))).	2392	2405	0.865385	-16.2	1	0.00200566	0.485	6.37638	5.60021	-5.61866	12	13	12	CDS		0	0
hsa-miR-708-5p	NM_001346897	EGFR	AAGGAGCTTACAATCTAGCTGGG#CCCAGTGGAGAAGCTCCC#..(((((((.(..((((.(((((#))))))))))))))))).	2205	2223	0.884615	-21.1	1	4.51e-05	0.471	5.0663	4.95835	-10.8354	17	18	17	CDS		0	0
hsa-miR-744-5p	NM_001346897	EGFR	TGCGGGGCTAGGGCTAACAGCA#GCGTCCGCCCGAGTCCCCGCC#.((((((((.((((..((.((.#))))..)))).)).)))))).	149	170	0.846154	-27.2	1	0.00423544	0.235	-0.199318	-0.166432	-6.00433	16	21	6	5UTR		0	0
hsa-miR-744-5p	NM_001346897	EGFR	TGCGGGGCTAGGGCTAACAGCA#TGGTGGGGGCCCTCCTCTTGCTGCTGGTGGTGGCCCTGGGG#(.((((((((..((((.(((((#.))))).))))..)))))))).).	2074	2115	0.846154	-25.7	1	9.37e-06	0.324	2.32607	2.04517	-11.2728	18	24	8	CDS		0	0
hsa-miR-885-5p	NM_001346897	EGFR	TCCATTACACTACCCTGCCTCT#GAGGCAGGGAATGCGTGGAC#(((((..((.(.(((((((((.#)))))))))).)).))))).	1717	1737	0.923077	-24.1	0	0.000283636	0.412	1.74046	3.59081	-11.9715	17	20	10	CDS		0	0
hsa-miR-885-3p	NM_001346897	EGFR	AGGCAGCGGGGTGTAGTGGATA#CCACTACATTGACGGCCCCCACTGCG#..((((.((((((((((((...#))))))))........)))).)))).	1874	1900	0.846154	-26.6	0	0.000138836	0.382	3.2486	2.98012	-6.50069	16	26	8	CDS		0	1
hsa-miR-877-5p	NM_001346897	EGFR	GTAGAGGAGATGGCGCAGGG#CCTGTGCCATCCAAACTGCA#((((....(((((((((((.#)))))))))))....)))).	1979	1999	0.923077	-25.9	0	0.000742301	0.397	4.13452	2.97974	-13.8149	15	20	11	CDS		0	0
hsa-miR-877-5p	NM_001346897	EGFR	GTAGAGGAGATGGCGCAGGG#CCTGCCCCCCACTCATGCTCTACA#(((((((((.(((.(((((.#)))))...))))))...)))))).	913	937	0.846154	-22.7	1	0.471845	0.412	2.72626	4.03004	-6.03692	17	24	6	CDS		0	0
hsa-miR-877-3p	NM_001346897	EGFR	TCCTCTTCTCCCTCCTCCCAG#TGGGAGCTGCTGGGGTGCAGGAGAGGAG#((((((((((((((((((((.#)))))).....)))).).))))))))).	713	741	0.923077	-27.9	1	0.000681535	0.456	3.43309	3.35198	-3.93757	20	28	9	CDS		0	0
hsa-miR-887-5p	NM_001346897	EGFR	CTTGGGAGCCCTGTTAGACTC#GAGTCGGGCTCTGGAGG#(((.(((((((.....(((((#)))))))))))).))).	323	340	0.846154	-23	0	4.87e-05	0.397	-0.363221	1.29726	-13.4309	15	17	12	CDS		0	0
hsa-miR-887-5p	NM_001346897	EGFR	CTTGGGAGCCCTGTTAGACTC#GAGTACCTCATCCCACAGCAGGGCTTCTT#...((((((((((((......#.)))))))))))).	3168	3197	0.846154	-20.5	0	0.000532908	0.353	4.8665	3.91732	-6.74759	12	14	12	CDS		0	0
hsa-miR-665	NM_001346897	EGFR	ACCAGGAGGCTGAGGCCCCT#GGGCACTTTTGAAGATCATTTTCTCAGCCTCCAGAGGA#.((.((((((((((((((..#))))..................))))))))))...)).	383	421	0.846154	-26.5	0	2.76e-05	0.529	2.72097	3.40792	-6.82535	16	38	10	CDS		0	0
hsa-miR-873-5p	NM_001346897	EGFR	GCAGGAACTTGTGAGTCTCCT#AGGAAATCACAGGGTTTTTGCT#((((((((((((((...((((#))))..))))))).))))))).	1321	1343	1	-20.2	1	0.000447806	0.559	4.50747	3.25791	-4.90607	18	22	7	CDS		0	0
hsa-miR-873-3p	NM_001346897	EGFR	GGAGACTGATGAGTTCCCGGGA#TCCGGGAACACAAAGACAATATTGGCTCCC#((((.((((((.(((((((((.#)))))))))..........)))))))))).	2530	2560	0.846154	-22.6	0	0.0136133	0.5	3.7445	5.11566	-11.4034	19	30	10	CDS		0	0
hsa-miR-543	NM_001346897	EGFR	AAACATTCGCGGTGCACTTCTT#AAGGGCATGAACTACTTGGAGGACCGTCGCTTGGTGCACCGCGAC#......((((((((((((....#.)))))))))))).	2592	2637	0.923077	-24.1	0	1.81e-06	0.426	7.27254	5.17127	-15.5666	12	14	12	CDS		0	0
hsa-miR-301b-5p	NM_001346897	EGFR	GCTCTGACGAGGTTGCACTACT#AGTGCAACCTTCTGGAGGGTG#(((((...(((((((((((...#)))))))))))....))))).	1738	1759	1	-23.1	0	0.000124759	0.441	3.78216	2.51676	-9.69585	16	21	11	CDS		0	0
hsa-miR-216b-3p	NM_001346897	EGFR	ACACACTTACCCGTAGAGATTCTA#GGAATGCGTGGACAAGTGCAACCTTCTGGAGGGTGAGCCAAGGGAGTTTGTGG#.(((((((((((.(((((......#.)))))..)))))))...........)))).	1724	1777	0.846154	-16.3	1	0.0109361	0.456	3.16766	2.67217	-5.08246	16	31	7	CDS		0	0
hsa-miR-920	NM_001346897	EGFR	GGGGAGCTGTGGAAGCAGTA#TGCTGCAGGCTGCACAGGCCCCCG#((((..(((((.(.((((((#))))))....).)))))..)))).	833	857	0.846154	-24	0	0.000115997	0.338	5.1207	3.62479	-14.1612	16	24	6	CDS		0	0
hsa-miR-920	NM_001346897	EGFR	GGGGAGCTGTGGAAGCAGTA#GCAGGGCTTCTTCAGCAGCCCCT#((((.((((.((((((.((.#))...)))))).))))..)))).	3185	3208	0.846154	-23.1	0	0.0154564	0.382	5.06033	3.8323	-9.29912	16	23	6	CDS		0	0
hsa-miR-921	NM_001346897	EGFR	CTAGTGAGGGACAGAACCAGGATTC#GAGGTGGCTGGTTATGTCCTCATTGC#.((((((.(((((.((((((..(((#)))....)))))).))))))))))).	510	536	0.846154	-21.7	1	0.00052619	0.485	3.84127	3.16819	-6.9638	20	26	11	CDS		0	0
hsa-miR-922	NM_001346897	EGFR	GCAGCAGAGAATAGGACTACGTC#ATGTGTGTGTTTGTGACAGATTTGATCCCTGTTCTCTCTGCT#((((.((((((((((........#.)))))))))))))).	3726	3768	0.846154	-22.5	0	0.0138036	0.574	-0.376413	-0.296089	-8.28966	14	16	14	3UTR		0	0
hsa-miR-922	NM_001346897	EGFR	GCAGCAGAGAATAGGACTACGTC#TGTGTCTGGTTGTTTGCTGTA#((((((((.(((.((((.(((..#))))))).))).)))))))).	3588	3609	0.923077	-20	1	0.0262758	0.588	-0.60424	-0.531949	-6.28309	18	21	8	3UTR		0	0
hsa-miR-924	NM_001346897	EGFR	AGAGTCTTGTGATGTCTTGC#GCAGCCCCTCCACGTCACGGACTCC#.(((((.((((((((.....#.))))))))))))).	3199	3224	0.923077	-17.5	0	0.00545191	0.368	3.4299	3.67181	-5.57006	13	15	13	CDS		0	0
hsa-miR-924	NM_001346897	EGFR	AGAGTCTTGTGATGTCTTGC#GCAGCTCATCACGCAGCTCA#.((((..(((((((..((((#))))..)))))))..)))).	2483	2503	0.807692	-17.3	0	0.00139238	0.382	3.97606	4.87197	-8.20647	15	20	7	CDS		0	0
hsa-miR-509-3-5p	NM_001346897	EGFR	TACTGCAGACGTGGCAATCATG#GCCAGGTCTGCC#....((((((.((((.......#)))).)))))).	1633	1645	0.923077	-20.8	0	4.33e-05	0.353	2.31651	2.74263	-12.6044	10	12	6	CDS		0	0
hsa-miR-933	NM_001346897	EGFR	TGTGCGCAGGGAGACCTCTCCC#GGGAGAGCGACTGCCTGGTCTGCCGCAA#..((((((((.((.((((((((#))))))).).)).))))......)))).	856	884	0.846154	-25	1	6.83e-05	0.353	2.06168	4.24134	-8.63862	18	28	7	CDS		0	0
hsa-miR-935	NM_001346897	EGFR	CCAGTTACCGCTTCCGCTACCGC#CGGTGGCATTTAGGGGTGACTC#..(((((((.((...(((((((.#)))))))....)).))))))).	1243	1265	0.923077	-24.4	1	0.000831079	0.441	1.4181	3.37952	-9.08093	16	22	7	CDS		0	0
hsa-miR-936	NM_001346897	EGFR	ACAGTAGAGGGAGGAATCGCAG#TGGGGGCCCTCCTCTTGCTGCTGG#.(((((((((((((..((.((.#)).))..))))).))..)))))).	2077	2101	1	-21.5	1	0.005468	0.324	2.13884	1.95696	-4.76182	17	24	6	CDS		0	0
hsa-miR-936	NM_001346897	EGFR	ACAGTAGAGGGAGGAATCGCAG#TGATCCCTGTTCTCTCTGCTGG#.(((((((((((((.((((...#)))).))...))))))))))).	3748	3770	0.846154	-21.1	1	0.00353509	0.588	-0.246434	-0.222337	-4.52877	17	22	11	3UTR		0	0
hsa-miR-937-5p	NM_001346897	EGFR	GTGAGTCAGGGTGGGGCTGG#CCAGCGCTACCTTGTCATTCAG#.(((((((((((((.(((((#))))).))))))))..))))).	3050	3072	0.807692	-25.9	1	0.00207581	0.471	5.31134	4.32653	-4.52877	18	22	8	CDS		0	0
hsa-miR-937-5p	NM_001346897	EGFR	GTGAGTCAGGGTGGGGCTGG#CGGCCCCCTGACTCCG#(.(((((((...(((((((.#))))))))))))))).	198	214	0.923077	-25.3	1	0.000349114	0.324	0.25989	-0.361154	-12.5153	15	16	15	5UTR		0	0
hsa-miR-937-5p	NM_001346897	EGFR	GTGAGTCAGGGTGGGGCTGG#CAATTCCACCGTGGCTTGCA#((((((((.(((((((.((.#)).))))))).)))))))).	3254	3274	1	-25.1	1	7.72e-05	0.485	2.05345	2.7713	-4.99396	17	20	8	CDS		0	0
hsa-miR-937-3p	NM_001346897	EGFR	ATCCGCGCTCTGACTCTCTGCC#GGCAGGGAATGCGTGGAC#.(((((((......((((((((#))))))))..))))))).	1719	1737	0.923077	-23.5	1	0.000283636	0.412	0.812581	3.46021	-14.4098	15	18	8	CDS		0	0
hsa-miR-938	NM_001346897	EGFR	TGCCCTTAAAGGTGAACCCAGT#GGGTGAGCCAAGGGA#..(((((...(((..((((...#))))..)))))))).	1754	1769	1	-19	0	0.00235314	0.471	2.12198	3.00393	-11.1618	12	15	8	CDS		0	0
hsa-miR-939-5p	NM_001346897	EGFR	TGGGGAGCTGAGGCTCTGGGGGTG#CATCCCACAGCAGGGCTTCTTCAGCAGCCCCT#.((((.((((((((((((((((((#))))))....)))))))...)))))..)))).	3176	3208	0.846154	-32	0	0.0154564	0.382	4.49572	3.49741	-5.69428	22	32	7	CDS		0	0
hsa-miR-939-5p	NM_001346897	EGFR	TGGGGAGCTGAGGCTCTGGGGGTG#CTCCCAGTGCCTGGTGAGTGGCTTGTCTGGAAACAGTCCTGCTCCTCAA#(((((((((.((((.(((((((..#))))))).)))).)..........................)))))))).	3384	3433	1	-31.3	1	0.00888355	0.412	0.52149	0.666232	-5.91553	20	49	8	CDS		0	0
hsa-miR-939-3p	NM_001346897	EGFR	CCCTGGGCCTCTGCTCCCCAG#CTGGGATGGTGGGGGCCCTCCTCTTGCTGCTGGTGGTGGCCCTGGGGA#(((((((((((((((.(((((#)))))..))))))))))).........................)))).	2068	2116	0.923077	-30.4	1	1.2e-05	0.324	2.42593	2.19338	-4.17062	20	48	11	CDS		0	1
hsa-miR-940	NM_001346897	EGFR	AAGGCAGGGCCCCCGCTCCCC#GGGCCTAAGATCCCGTCCATCGCCACTGGGATGGTGGGGGCCCTCCTC#.(((.(((((((((((((((.#.))))..)))))))))))))).	2043	2091	1	-35.8	0	5.02e-08	0.309	1.89573	3.08024	-7.91236	18	22	14	CDS		0	0
hsa-miR-941	NM_001346897	EGFR	CACCCGGCTGTGTGCACATGTGC#GCACGAGTAACAAGCTCACGCAGTTGGGC#..((((((((((((.((.(((((#))))).))........)))))))))))).	358	387	1	-25	1	3.82e-05	0.515	2.15003	2.58006	-5.69245	19	29	12	CDS		0	0
hsa-miR-942-5p	NM_001346897	EGFR	TCTTCTCTGTTTTGGCCATGTG#ATGTCAGCCGAGGCAGGGAAT#..((((((((((((((......#.)))))))))))))).	1708	1729	1	-21.3	1	2.81e-05	0.412	2.41339	3.59309	-4.957	14	16	14	CDS		0	0
hsa-miR-942-3p	NM_001346897	EGFR	CACATGGCCGAAACAGAGAAGT#ACGCAGACGCCGGCCATGTGT#((((((((((............#.)))))))))).	1954	1975	0.923077	-20	1	7.04e-05	0.397	2.44207	3.12805	-13.2236	10	12	10	CDS		0	0
hsa-miR-943	NM_001346897	EGFR	CTGACTGTTGCCGTCCTCCAG#GGCAGGACCAAGCAACATGGTCAGT#(((((((((((.(((((((..#)).)))))...))))))..))))).	1407	1432	0.923077	-24	1	0.00359411	0.529	3.76655	3.01341	-7.28438	18	25	6	CDS		0	0
hsa-miR-943	NM_001346897	EGFR	CTGACTGTTGCCGTCCTCCAG#CTGGAGGAAAAGAAAGTTTGCCAAGGCACGAGTAACAAGCTCACGCAGTTGGG#((((((((((((.((((((((#))))))))................))))................)))))))).	333	386	0.846154	-22.5	1	3.79e-05	0.515	2.49766	1.67299	-5.22671	20	53	8	CDS		0	0
hsa-miR-1178-3p	NM_001346897	EGFR	TTGCTCACTGTTCTTCCCTAG#AGGGGGAAACAGTGGCAGA#((((.(((((((.((((((..#)))))).))))))))))).	3502	3521	0.923077	-22.4	0	0.00103524	0.426	-0.965825	-0.827347	-9.34574	17	19	11	CDS		0	1
hsa-miR-1180-5p	NM_001346897	EGFR	GGACCCACCCGGCCGGGAATA#ATTTTGGGCTGGCCAAACTGCTGGGTGCG#(.((((((((((((.(((((.#))))).)))))).......).))))).).	2689	2718	0.846154	-22.6	1	0.000453417	0.5	4.81637	5.56359	-5.8367	18	29	6	CDS		0	0
hsa-miR-1180-3p	NM_001346897	EGFR	TTTCCGGCTCGCGTGGGTGTGT#GCGCTCTGCCCGGCGAGTCGGGC#..((((((((((.(((((((((#))))...))))))))))))))).	309	332	1	-28.6	1	2.13e-08	0.353	-0.569229	1.31411	-6.24613	19	23	15	CDS		0	0
hsa-miR-1181	NM_001346897	EGFR	CCGTCGCCGCCACCCGAGCCG#GGCTCCGGTGCGTTCGGCACGGT#((((.(((((((((.(((((.#))))).)))).)..)))))))).	2280	2303	0.846154	-28.5	0	2.09e-06	0.441	5.88612	5.61975	-8.79206	18	23	8	CDS		0	0
hsa-miR-1182	NM_001346897	EGFR	GAGGGTCTTGGGAGGGATGTGAC#ACTCCCCTCCTGAGCTCTCT#(((((.((((((((((..((...#))..))))))))))))))).	3219	3239	0.923077	-26.5	0	0.0216938	0.382	3.28624	3.15429	-5.83853	17	20	15	CDS		0	0
hsa-miR-1182	NM_001346897	EGFR	GAGGGTCTTGGGAGGGATGTGAC#CACCTTCCTCCCAGTGCCTG#..((((.((((((((((.(((..#))).)))))))))).)))).	3377	3397	0.969231	-26	0	0.000647236	0.426	2.89885	1.1517	-6.50069	17	20	10	CDS		0	0
hsa-miR-1183	NM_001346897	EGFR	CACTGTAGGTGATGGTGAGAGTGGGCA#TGCCTGCCTCAGGCCATGAACATCACCTGCAC#...((((((((((((((((.(((((((#))))))))))..))))......))))))))).	1809	1841	0.923077	-29.6	0	0.031	0.412	2.66683	3.02719	-6.51454	23	32	10	CDS		0	0
hsa-miR-1183	NM_001346897	EGFR	CACTGTAGGTGATGGTGAGAGTGGGCA#TCTGCCTCACCTCCACCGTGCAGC#..(((((((((..((((((.(((((..#)))))))))))..)))).))))).	2464	2488	0.846154	-27.7	1	0.00294467	0.324	4.3133	4.8786	-9.59293	20	24	11	CDS		0	0
hsa-miR-1225-5p	NM_001346897	EGFR	GTGGGTACGGCCCAGTGGGGGG#CCCCCACGTGTGCCGCCTGCTGGGCATCTGCCTCACC#(((((((..((((((((((.((#.)).))))))))))...)))).))).	2438	2475	0.897436	-32	1	0.000112977	0.353	4.19394	5.7822	-7.3076	19	26	10	CDS		0	0
hsa-miR-1225-5p	NM_001346897	EGFR	GTGGGTACGGCCCAGTGGGGGG#CCCCCACTGCGTCAAGACCTGCC#((((((..(((.(((((((((.#))))))))).)))...)))))).	1889	1912	1	-30.2	0	3.3e-05	0.397	3.16303	3.09819	-11.1417	18	23	9	CDS		0	0
hsa-miR-1225-3p	NM_001346897	EGFR	TGAGCCCCTGTGCCGCCCCCAG#CTGGAGGGTGAGCCAAGGGAGTTTG#.((((((((..(((((((((((#)))).))))).))..)))).)))).	1749	1774	0.923077	-27.6	1	0.00729363	0.471	3.56627	2.74756	-7.86061	19	25	5	CDS		0	0
hsa-miR-1225-3p	NM_001346897	EGFR	TGAGCCCCTGTGCCGCCCCCAG#CTGCCGGTGGCATTTAGGGGTGACT#.(.((((((((((((((..(((#)))..))))))))..))))))..).	1239	1264	0.846154	-26.9	0	0.000367195	0.441	2.66619	3.14757	-5.35086	18	25	8	CDS		0	0
hsa-miR-1226-5p	NM_001346897	EGFR	GTGAGGGCATGCAGGCCTGGATGGGG#CCACAGGCCAGGTCTGCCATGCCTTGTGCT#((.(((((((((((((((((.((((.#)).))..)))))))))).)))))))..)).	1627	1657	1	-34.6	0	0.000797694	0.265	1.18628	2.77025	-5.49511	23	30	10	CDS		0	0
hsa-miR-1226-5p	NM_001346897	EGFR	GTGAGGGCATGCAGGCCTGGATGGGG#CCTCATCCCACAGCAGGGCTTCTTCAGCAGCCCCTCCACG#(((((((..(((((((((((((((((#)))))))).......)))))).....)))..))))).)).	3173	3213	0.846154	-31.2	1	0.0106749	0.368	4.4242	3.52107	-7.3076	24	40	8	CDS		0	0
hsa-miR-1226-3p	NM_001346897	EGFR	TCACCAGCCCTGTGTTCCCTAG#AGGGAATGCGTGGACAAGTGCAACCTTCTGGAGGGTGAG#(((((..((.((((((((((..#)))))))))).))....................))))).	1722	1761	0.923077	-20.7	0	8.13e-05	0.456	2.73214	3.37652	-8.62473	17	39	10	CDS		0	0
hsa-miR-1227-5p	NM_001346897	EGFR	GTGGGGCCAGGCGGTGG#CCACCGCGCACGGCCCCC#..((((((..(((((((#)))))))....)))))).	188	206	0.846154	-27.8	1	0.00260029	0.309	-0.36322	-0.313308	-7.2559	13	18	7	5UTR		0	0
hsa-miR-1227-3p	NM_001346897	EGFR	CGTGCCACCCTTTTCCCCAG#GGGGGAAACAGTGGCAG#..((((((..((((((((..#))))))))..)))))).	3503	3520	0.884615	-23.8	1	0.00373738	0.441	-0.149704	-0.700033	-7.2559	14	17	8	CDS		0	0
hsa-miR-1227-3p	NM_001346897	EGFR	CGTGCCACCCTTTTCCCCAG#CTGGAGGAAAAGAAAGTTTGCCAAGGCACGA#((((((((.(((((((((((#)))).)))))))...)).......)))))).	333	364	0.923077	-22.7	1	0.000650739	0.485	1.44253	1.05385	-4.99396	19	31	7	CDS		0	0
hsa-miR-1228-3p	NM_001346897	EGFR	TCACACCTGCCTCGCCCCCC#GGGGCCCGGAGCCCAGGGACTGCGTCTCTTGCCGGAATGTCAGCCGAGGCAGGG#.....(((((((((((((((#)))).............................)).........))))))))).	1672	1726	0.846154	-21	0	1.4e-05	0.397	3.02932	2.47922	-13.6656	15	54	9	CDS		0	0
hsa-miR-1229-5p	NM_001346897	EGFR	GTGGGTAGGGTTTGGGGGAGAGCG#TGTGCTCCCCCGAGGGCTGCTGGGGCCCGGAGCCCAG#.(((((.(((((((((((((.(((#))).)))))))))...........))))...))))).	1651	1688	1	-30.3	0	2.95e-07	0.294	5.00718	1.90267	-5.33701	21	37	9	CDS		0	0
hsa-miR-1229-5p	NM_001346897	EGFR	GTGGGTAGGGTTTGGGGGAGAGCG#CGCCTCCCTCAGCCACCCATA#((((((..((.(((((((((.(((#)))))))))))))))))))).	2919	2940	0.846154	-29.8	0	0.109624	0.5	4.23703	5.67526	-10.6197	20	21	20	CDS		0	0
hsa-miR-1231	NM_001346897	EGFR	GTGTCTGGGCGGACAGCTGC#GCGGCCGCCGCCGCCCAGACCG#(.((((((((((...(((((#))))).....))))))))))).	107	129	0.846154	-29.2	1	0.0020923	0.191	0.356535	-0.36783	-7.98267	16	22	11	5UTR		0	0
hsa-miR-1233-5p	NM_001346897	EGFR	AGTGGGAGGCCAGGGCACGGCA#TGTATCCAGTGTGCCCACTACATTGACGGCCCCCACTG#((((((.((((.(((((((...#.)))))))...........)))))))))).	1860	1898	1	-28.9	0	0.000430198	0.382	2.38143	3.29854	-8.82806	17	30	10	CDS		0	1
hsa-miR-1233-5p	NM_001346897	EGFR	AGTGGGAGGCCAGGGCACGGCA#GCGACTGCCTGGTCTGCCGCA#.((((.((((((((.....((.#)).....)))))))).)))).	862	883	0.846154	-27.5	0	5.22e-05	0.338	4.87688	3.97304	-6.66278	14	21	8	CDS		0	1
hsa-miR-1233-3p	NM_001346897	EGFR	TGAGCCCTGTCCTCCCGCAG#CTGCGGAGGCTGCTGCAGGAGAGGGAGCT#.(..((((.(((((((((((#)))))).)........)))).))))..).	2160	2189	0.846154	-23.2	0	0.000784722	0.368	3.37382	3.91113	-9.43928	16	29	6	CDS		0	0
hsa-miR-1233-3p	NM_001346897	EGFR	TGAGCCCTGTCCTCCCGCAG#CTGCACAGGACGGGGACCAG#((..(((((((((...((((#))))..)))))))))..)).	1835	1855	0.846154	-22.9	0	0.000190126	0.456	3.92425	3.13144	-10.3525	15	20	9	CDS		0	0
hsa-miR-1234-3p	NM_001346897	EGFR	TCGGCCTGACCACCCACCCCAC#GGAGGTGGCTGGTTATGTCC#..(((.((((((.(((((((..#)).))))).)))))).))).	509	529	0.923077	-23.9	0	0.000879982	0.5	5.28038	3.13445	-8.14709	16	20	6	CDS		0	0
hsa-miR-1236-5p	NM_001346897	EGFR	TGAGTGACAGGGGAAATGGGGA#CCCGAGACCCCCAGCGCTACCTTGTCATTCAG#((((((((((((....(((((.#.)))))......)))))))))))).	3040	3072	0.826923	-28.6	1	0.00207581	0.471	4.08234	4.54822	-7.05204	17	25	12	CDS		0	0
hsa-miR-1236-3p	NM_001346897	EGFR	CCTCTTCCCCTTGTCTCTCCAG#CTGGAGGGTGAGCCAAGGGAGTTTGTGGAGA#.((((.(((((((.((((((((#)))))))).....)))))).....).)))).	1749	1780	0.923077	-22.2	0	0.0773237	0.441	3.45403	2.74489	-6.55112	19	31	8	CDS		0	0
hsa-miR-1236-3p	NM_001346897	EGFR	CCTCTTCCCCTTGTCTCTCCAG#CTGGGGTGCAGGAGAGGAGA#.((((((.((.(((..((((((#)))))).))))).)))))).	722	742	0.846154	-21.8	1	0.00128743	0.456	6.92871	3.23709	-9.90023	17	20	6	CDS		0	0
hsa-miR-1237-5p	NM_001346897	EGFR	CGGGGGCGGGGCCGAAGCGCG#GCGCTGCTGGCTGCGCTCTGCCCGG#((((((((.(((((.(((((.#)))))..))))).))))...)))).	297	322	0.846154	-32.4	1	1.31e-05	0.324	-0.362064	1.23892	-5.72941	18	25	5	CDS		0	0
hsa-miR-1237-5p	NM_001346897	EGFR	CGGGGGCGGGGCCGAAGCGCG#TGTGCTGCAGGCTGCACAGGCCCCCGG#((((((((.((((..((((((#))))))...)))).)....))))))).	831	858	0.923077	-32	1	0.000115684	0.353	4.12823	4.04473	-6.58625	18	27	7	CDS		0	0
hsa-miR-1237-5p	NM_001346897	EGFR	CGGGGGCGGGGCCGAAGCGCG#CGCGCACGGCCCCCTGACTCCGT#(((((..(((((((..(((((#))))).)))))))....))))).	192	215	0.846154	-31.7	0	0.000360324	0.324	0.25989	-0.361154	-8.35072	17	23	7	5UTR		0	0
hsa-miR-1237-3p	NM_001346897	EGFR	TCCTTCTGCTCCGTCCCCCAG#CTGGCCAAACTGCTGGGTGCGGAAGAGAAAGAATACCATGCAGAAGGAG#((((((((((((((..(((((#.))))).)))))................))))))))).	2697	2746	0.923077	-27.6	1	0.000175152	0.5	4.53615	5.96519	-4.90607	19	38	9	CDS		0	0
hsa-miR-1238-5p	NM_001346897	EGFR	GTGAGTGGGAGCCCCAGTGTGTG#CGCGCACGGCCCCCTGACT#((.((.(((.(((...(((((((#))))))))))))))).)).	192	211	0.923077	-23.3	0	0.00145306	0.309	-0.0325905	-0.32666	-10.4639	17	19	15	5UTR		0	0
hsa-miR-1238-3p	NM_001346897	EGFR	CTTCCTCGTCTGTCTGCCCC#GGGGCCGACAGCTATGAGATGGAGGAAGA#(((((((..(((((.(((((#))))).)))))..........))))))).	1059	1088	0.846154	-27.1	1	0.0724849	0.397	4.87221	4.11402	-8.04305	17	29	7	CDS		0	0
hsa-miR-1238-3p	NM_001346897	EGFR	CTTCCTCGTCTGTCTGCCCC#GGGGTGCAGGAGAGGAGA#.((((((.(((((..(((((#)))))))))).)))))).	724	742	0.861538	-24.2	1	0.00128743	0.456	0.568324	3.46502	-7.69925	16	18	10	CDS		0	0
hsa-miR-1238-3p	NM_001346897	EGFR	CTTCCTCGTCTGTCTGCCCC#GGAGGCTGCTGCAGGAGAGGGAGC#(((((((.(((((..(((((#)).)))....))))).))))))).	2164	2188	0.846154	-23.6	1	0.00111238	0.368	4.73837	4.09754	-7.8435	17	24	7	CDS		0	0
hsa-miR-1200	NM_001346897	EGFR	CTCCTGAGCCATTCTGAGCCTC#GCTGCGGAGGCTGCTGCAGGAGA#(((((((((..((((((((...#))).)))))...))).)))))).	2159	2182	0.923077	-22.3	1	1.02e-05	0.368	4.85314	4.05929	-8.00486	17	23	6	CDS		0	0
hsa-miR-1202	NM_001346897	EGFR	GTGCCAGCTGCAGTGGGGGAG#CTCCCCCGAGGGCTGCTGGGGCC#((.(((((.((..((((((((#))))))))...)).))))).)).	1655	1678	0.846154	-30.8	0	6.59e-08	0.279	2.30557	2.28002	-11.1874	17	23	8	CDS		0	0
hsa-miR-1202	NM_001346897	EGFR	GTGCCAGCTGCAGTGGGGGAG#CCCCCACTGCGTCAAGACCTGCCCGGCAG#.((((.(((((((((((((..#))))))))))).........))..)))).	1889	1918	0.865385	-28.4	0	7.14e-05	0.397	3.59977	3.14974	-5.69428	17	29	11	CDS		0	0
hsa-miR-1203	NM_001346897	EGFR	CCCGGAGCCAGGATGCAGCTC#GGCTGCCTCCTGGACTATGTCCGGGA#(((((((((((((.((((((.#)))))).)))))).)....)))))).	2511	2537	0.846154	-31.9	1	1.25e-07	0.441	3.98027	5.12893	-4.79441	19	26	6	CDS		0	0
hsa-miR-1204	NM_001346897	EGFR	TCGTGGCCTGGTCTCCATTAT#TGGGGATCGGCCTCTTCATGCGAA#((((((((.((((((((....#)))))))))))).......)))).	2110	2134	0.923077	-21.4	1	3.13e-05	0.338	2.28446	3.05327	-4.99396	16	24	12	CDS		0	0
hsa-miR-1205	NM_001346897	EGFR	TCTGCAGGGTTTGCTTTGAG#CGGAGCGAGCTCTTCGGGG#((((.(((((((((((((..#))))))))))))).)))).	235	254	0.846154	-21.3	0	0.000177307	0.309	-0.632223	-0.139728	-8.05661	17	19	13	5UTR		0	0
hsa-miR-1205	NM_001346897	EGFR	TCTGCAGGGTTTGCTTTGAG#GGAGCGAATTCCTTTGGAAAACCTGCAGAT#(((((((((((((((((...#)))))))))............)))))))).	548	578	0.846154	-20.4	1	0.0131036	0.603	3.10023	3.49053	-3.93757	17	30	9	CDS		0	0
hsa-miR-1207-5p	NM_001346897	EGFR	TGGCAGGGAGGCTGGGAGGGG#CTCCTCCATCCTGGAGAAAGGAGAACGCCTCCCTCAGCCAC#((((((((((((..(((((((#)))))))...................))))))))..)))).	2894	2935	0.846154	-30.5	1	0.0350083	0.471	5.09614	5.73521	-6.08354	19	41	8	CDS		0	0
hsa-miR-1207-5p	NM_001346897	EGFR	TGGCAGGGAGGCTGGGAGGGG#CCCCCAGCGCTACCTTGTCAT#((((((((((((((((.((..#)))))))).)).)))))))).	3047	3068	0.923077	-28.7	1	0.133036	0.471	4.50816	4.37633	-3.93757	18	21	8	CDS		0	0
hsa-miR-1207-5p	NM_001346897	EGFR	TGGCAGGGAGGCTGGGAGGGG#CCCCTCCTGAGCTCTCTGA#...(((((((..(((((((((#)))))))))..))))))).	3222	3241	0.923077	-28.2	0	0.0051731	0.382	2.80281	3.30852	-12.6861	16	19	9	CDS		0	0
hsa-miR-1207-3p	NM_001346897	EGFR	TCAGCTGGCCCTCATTTC#GAGGGCTGCTGGG#(((((.(((((((.....#)))))))))))).	1662	1675	0.846154	-21.2	0	1.27e-06	0.294	3.72591	1.83688	-7.66387	12	13	12	CDS		0	0
hsa-miR-1208	NM_001346897	EGFR	TCACTGTTCAGACAGGCGGA#TGGCTTGTCTGGAAACAGTC#..(((((((((((((((.(.#).))))))))))..))))).	3402	3422	0.884615	-21	1	0.000579819	0.397	-0.205461	0.72003	-4.957	16	20	10	CDS		0	0
hsa-miR-1208	NM_001346897	EGFR	TCACTGTTCAGACAGGCGGA#CAACCTTCTGGAGGGTGAG#(((((.((((((.(((..(.#)..))))))))).))))).	1742	1761	1	-19.4	0	8.13e-05	0.456	2.57901	2.66561	-7.12766	15	19	9	CDS		0	0
hsa-miR-1285-5p	NM_001346897	EGFR	GATCTCACTTTGTTGCCCAGG#GGGCCAAAAGTGTGATCC#((((.((((((...((((...#))))..)))))).)))).	683	701	0.846154	-20.4	0	0.000447127	0.456	2.59861	2.53156	-13.5494	14	18	6	CDS		0	0
hsa-miR-1286	NM_001346897	EGFR	TGCAGGACCAAGATGAGCCCT#AGTGGCTTGTCTGGAAACAGTCCTGCT#.(((((((..(((((((((((#)).))))))))).......))))))).	3400	3427	1	-24.3	1	0.00186347	0.412	0.994571	0.652142	-6.09222	18	27	9	CDS		0	0
hsa-miR-1286	NM_001346897	EGFR	TGCAGGACCAAGATGAGCCCT#GGCTCTATCTTGACCTGTG#.(((((..(((((((((((..#))))).)))))).))))).	3768	3787	0.923077	-22.8	0	0.00644499	0.647	0.11624	-0.209923	-7.65065	16	19	6	3UTR		0	0
hsa-miR-1287-5p	NM_001346897	EGFR	TGCTGGATCAGTGGTTCGAGTC#GACGGGGACCAGACAACTGTATCCAGTG#.((((((((((((((((..(((#)))..))))).....)))).))))))).	1843	1871	0.846154	-23.1	1	0.000231558	0.382	2.74528	3.2966	-3.79332	19	28	7	CDS		0	0
hsa-miR-1289	NM_001346897	EGFR	TGGAGTCCAGGAATCTGCATTTT#AGAATGCATTTGCCAAGTCCTACAGACTCCAA#(((((((.((((...((((((((#)))))))).........))))...))))))).	3081	3113	0.923077	-20.2	1	0.0101494	0.529	4.57576	4.51377	-9.13263	19	32	8	CDS		0	0
hsa-miR-1289	NM_001346897	EGFR	TGGAGTCCAGGAATCTGCATTTT#AAGATCAAAGTGCTGGGCTCCGG#((((((((((.(...((.(((((#)))))))...).)))))))))).	2265	2288	0.871795	-19.8	1	0.000253813	0.5	4.59809	5.66325	-9.64377	18	23	10	CDS		0	0
hsa-miR-548k	NM_001346897	EGFR	AAAAGTACTTGCGGATTTTGCT#GGCGTCCGCAAGTGT#.....(((((((((((...(((#)))))))))))))).	1089	1104	0.807692	-18.5	0	0.000100622	0.441	2.66427	3.87034	-13.6656	14	15	14	CDS		0	0
hsa-miR-1293	NM_001346897	EGFR	TGGGTGGTCTGGAGATTTGTGC#CGGACGACAGGCCACCTC#.((((((((((..(.((((...#)))))..)))))))))).	127	145	0.846154	-21	1	2.39e-05	0.176	-0.133052	-0.179784	-9.16471	15	18	10	5UTR		0	0
hsa-miR-1294	NM_001346897	EGFR	TGTGAGGTTGGCATTGTTGTCT#GGACGACGTGGTGGATGCCGACGAGTACCTCATC#.(((((((((((((((((((((#)))))))......)))))))......))))))).	3146	3180	0.846154	-22.8	1	0.00776969	0.382	4.36172	3.77708	-3.79332	21	34	7	CDS		0	0
hsa-miR-1295a	NM_001346897	EGFR	TTAGGCCGCAGATCTGGGTGA#GGCCAGGTCTGCCATGCCTT#..((((.((((((((((.(..#).))))))))))...)))).	1632	1652	1	-24.4	0	0.000222203	0.309	2.08901	2.7522	-6.50069	15	20	10	CDS		0	0
hsa-miR-1299	NM_001346897	EGFR	TTCTGGAATTCTGTGTGAGGGA#TCCTTCACACATACTCCTCCTCTGGATCCACAGGAA#((((((.(((((((((((((((#)))))))))))............)))).).))))).	1263	1299	0.846154	-20.8	0	0.000268899	0.559	2.2177	3.32943	-5.48126	21	36	11	CDS		0	0
hsa-miR-548l	NM_001346897	EGFR	AAAAGTATTTGCGGGTTTTGTC#GGAAAACCTGCAGATCA#....(.(((((((((((((.(.#).)))))))))))))).	563	580	0.846154	-16.5	0	0.235606	0.588	4.15589	3.04941	-11.4475	15	17	14	CDS		0	0
hsa-miR-1303	NM_001346897	EGFR	TTTAGAGACGGGGTCTTGCTCT#GGGCCTAAGATCCCGTCCA#....(.(((((((((((((((.#))))..)))))))))))).	2043	2062	1	-23.7	0	1.12e-05	0.382	1.59417	3.10906	-11.4475	16	19	12	CDS		0	0
hsa-miR-1304-3p	NM_001346897	EGFR	TCTCACTGTAGCCTCGAACCCC#GAGGCTGCTGCAGGAGAG#((((.((((((((((.......#))))))...)))))))).	2165	2183	0.846154	-20.1	0	1.52e-05	0.353	4.22826	4.04132	-8.28966	14	18	8	CDS		0	0
hsa-miR-1244	NM_001346897	EGFR	AAGTAGTTGGTTTGTATGAGATGGTT#GACCCACTCAGCAGCAGCCAGTCTCCAGTGTCCAAGCCAGGTGCTC#.((((.((((((((.(((((((((((#.))))).))))....)).)))))))).)))).	3440	3486	0.846154	-23.1	0	0.000837	0.397	-0.1433	-0.0280187	-6.42973	23	32	8	CDS		0	0
hsa-miR-1245a	NM_001346897	EGFR	AAGTGATCTAAAGGCCTACAT#TGGGCACTTTTGAAGATCATTTT#((((((((((((((((((...#))))).))))...))))))))).	382	405	0.846154	-17.5	1	0.029263	0.559	2.94003	3.17554	-3.93757	18	23	9	CDS		0	0
hsa-miR-1250-5p	NM_001346897	EGFR	ACGGTGCTGGATGTGGCCTTT#AAGGCCACAGGCCAGGTCTGC#.(((..((((.(((((((((.#)))))))))..))))..))).	1623	1644	0.846154	-25	0	3.96e-05	0.368	0.81929	2.73553	-12.6381	16	21	9	CDS		0	0
hsa-miR-1256	NM_001346897	EGFR	AGGCATTGACTTCTCACTAGCT#AGCTACGGGGTGACTGTTTGGGAGTTGATGACCTT#((((((((((((((((((((((#))))....))))).......)))))))))).))).	2820	2855	0.846154	-19.3	1	0.00856336	0.471	6.33706	4.76826	-3.93757	22	35	10	CDS		0	0
hsa-miR-1258	NM_001346897	EGFR	AGTTAGGATTAGGTCGTGGAA#CACGGCCCCCTGACTC#(((((((....(((((((...#))))))).))))))).	196	212	1	-19	1	0.000807589	0.309	0.399772	-0.382295	-11.3749	14	16	7	5UTR		0	0
hsa-miR-1261	NM_001346897	EGFR	ATGGATAAGGCTTTGGCTT#AGGCCAGGTCTGCCATGCCTTGTGCT#..(.(((((((..((((..#.)))).))))))).).	1631	1657	0.846154	-18.4	0	0.000797694	0.265	2.65714	2.72267	-12.625	12	16	7	CDS		0	0
hsa-miR-1262	NM_001346897	EGFR	ATGGGTGAATTTGTAGAAGGAT#TCCTTCTTAAAGACCATCCAG#.((((((..((((.(((((((.#)))))))))))...)))))).	489	510	0.846154	-18	1	0.0158856	0.544	3.82957	4.12039	-8.02019	17	21	11	CDS		0	0
hsa-miR-1265	NM_001346897	EGFR	CAGGATGTGGTCAAGTGTTGTT#GCACCTACGGATGCACTGGGCCAGGTCTTGA#((((((.(((((.(((((....#.))))).))))).)))))).	1996	2027	0.923077	-23.4	0	4.37e-05	0.441	2.02886	2.28464	-6.77039	16	20	6	CDS		0	0
hsa-miR-1266-5p	NM_001346897	EGFR	CCTCAGGGCTGTAGAACAGGGCT#GCCACTGGGATGGTGGGGGCCCTCCTCTTGCTGCTGGTGGTGGCCCTGGGGA#(((((((((((((((..((((((#.))))))..))).))..........)))))))))).	2064	2116	1	-30.5	1	1.2e-05	0.324	2.54371	2.00373	-4.17062	21	36	10	CDS		0	0
hsa-miR-1266-5p	NM_001346897	EGFR	CCTCAGGGCTGTAGAACAGGGCT#AGTCCTACAGACTCCAACTTCTACCGTGCCCTGATGGA#(((((((((.((((((.((((((#))))))............))))))...))))))).)).	3096	3134	0.923077	-25.6	1	0.000472117	0.485	3.3136	4.50906	-5.18008	21	38	7	CDS		0	0
hsa-miR-1266-3p	NM_001346897	EGFR	CCCTGTTCTATGCCCTGAGGGA#CCCAGAGTGCCTGCCTCAGGCCATGAACATCACCTGCACAGGACGGGGA#(((((((((.((((((((((.(#.).)))))))...............))).))))))))).	1802	1851	1	-28.7	1	5.66e-05	0.426	3.10913	2.97084	-5.18008	20	39	9	CDS		0	0
hsa-miR-1267	NM_001346897	EGFR	CCTGTTGAAGTGTAATCCCCA#GGGATTACGCTCCCTCAAGGA#((((..(.(((((((((((..#))))))))))).)..)).)).	1469	1490	0.923077	-20.6	0	1.32e-05	0.574	3.88128	2.99805	-12.2712	16	21	11	CDS		0	0
hsa-miR-1268a	NM_001346897	EGFR	CGGGCGTGGTGGTGGGGG#CCTCGCCGCCAACGCCA#..(((((((((((((((.#))))))))))).)))).	168	185	0.857692	-29.5	1	0.00190628	0.221	-0.198701	-0.171996	-4.957	15	17	11	5UTR		0	0
hsa-miR-1269a	NM_001346897	EGFR	CTGGACTGAGCCGTGCTACTGG#CAGATCACGGCTCGTGCGTCCGA#.((((((((((((((.(.(((.#)))).)))))))))...))))).	1030	1053	0.826923	-24.2	1	8.02e-05	0.426	4.08182	4.1496	-4.02637	18	23	9	CDS		0	0
hsa-miR-1270	NM_001346897	EGFR	CTGGAGATATGGAAGAGCTGTGT#CAGGTGCTCCCTCCAGCATCTCCAGA#((((((((.((((.(((((.((.#)).).))))..))))..)))))))).	3477	3503	0.846154	-24.3	1	2.17e-05	0.412	-0.879821	-0.578034	-5.8508	19	26	8	CDS		0	0
hsa-miR-1275	NM_001346897	EGFR	GTGGGGGAGAGGCTGTC#GACAGCTTCTTGCAGCGATACAGCTCAGACCCCACA#(((((((((((((((((#)))))))))))..................)))))).	3312	3348	1	-26.5	1	0.0434702	0.441	3.54882	2.03936	-3.93757	17	36	11	CDS		0	1
hsa-miR-1276	NM_001346897	EGFR	TAAAGAGCCCTGTGGAGACA#TCTCTGCTGGCTCTA#...((((((..(((((((..#))))))).)))))).	3760	3775	0.820513	-19.4	0	0.00517634	0.603	0.0174871	-0.194589	-10.5818	13	15	7	3UTR		0	0
hsa-miR-1278	NM_001346897	EGFR	TAGTACTGTGCATATCATCTAT#TGGATGATAGACGCAGA#.....(((((..(((((((((.#)))))))))..))))).	2976	2993	0.846154	-18.1	0	0.00312977	0.529	8.20101	4.88812	-19.8372	14	17	9	CDS		0	0
hsa-miR-1281	NM_001346897	EGFR	TCGCCTCCTCCTCTCCC#GAGATGGAGGAAGACGGCGT#.((((((((((((((..#)))).))))))....)))).	1074	1094	0.884615	-21.1	1	0.00147774	0.412	4.44865	4.40518	-4.02637	14	20	6	CDS		0	0
hsa-miR-1288-5p	NM_001346897	EGFR	GCAGATCAGGACTGTAACTCACC#GGGAGAGCGACTGCCTGGTCTGCC#((((((((((.(.((..(((.((#))..)))..)).))))))))))).	856	880	0.846154	-24.6	1	0.000172424	0.338	5.69148	3.85209	-8.28453	18	24	11	CDS		0	0
hsa-miR-1288-3p	NM_001346897	EGFR	TGGACTGCCCTGATCTGGAGA#CCAGGTCTTGAAGGCTGTCCAA#(((((.(((..(((((((...#))))))).....))).))))).	2016	2038	0.820513	-23.1	0	0.000369959	0.397	4.11375	2.2757	-9.90581	15	22	7	CDS		0	0
hsa-miR-1288-3p	NM_001346897	EGFR	TGGACTGCCCTGATCTGGAGA#CTCCAGAGGATGTTCAATAACTGTGAGGTGGTCCT#.(((((((((...(((((((.#))))))).................).)))))))).	411	446	1	-22.2	1	0.000335706	0.544	3.29226	2.97927	-11.254	16	35	8	CDS		0	0
hsa-miR-1292-3p	NM_001346897	EGFR	TCGCGCCCCGGCTCCCGTTC#AATGGGAGCTGCTGGGGTGCA#..(((((((((((((((((.#))))))))))...))))))).	711	732	0.923077	-30.8	1	6.5e-06	0.441	4.00006	3.72185	-4.957	17	21	10	CDS		0	0
hsa-miR-1255b-5p	NM_001346897	EGFR	CGGATGAGCAAAGAAAGTGGTT#GCCACCTGTGCCATCCA#.(((((.(((.((...(((((.#))))))).)))))))).	1975	1992	0.846154	-18	0	0.000554338	0.368	4.90412	3.29445	-9.98712	15	17	8	CDS		0	0
hsa-miR-1255b-2-3p	NM_001346897	EGFR	AACCACTTTCTTTGCTCATCCA#GGGTGAGCCAAGGGAGTTTGTGGA#..(((((((((((((((((((.#)))))))).)))))))...)))).	1754	1778	0.923077	-24.1	1	0.0163469	0.441	3.45278	2.84559	-4.957	19	24	8	CDS		0	0
hsa-miR-664a-5p	NM_001346897	EGFR	ACTGGCTAGGGAAAATGATTGGAT#ATCCAAGCCATATGACGGAATCCCTGCCAGC#.(((((.(((((..(((.((((((#))))))..))).........)))))))))).	2858	2889	0.846154	-20.9	0	0.0118478	0.471	4.22965	5.40947	-7.48298	19	31	10	CDS		0	0
hsa-miR-664a-5p	NM_001346897	EGFR	ACTGGCTAGGGAAAATGATTGGAT#GATCATTTTCTCAGCCT#...((((.((((((((((((....#)))))))))))))))).	396	413	1	-21.1	0	0.0024501	0.529	2.94913	3.28387	-8.82818	16	17	16	CDS		0	0
hsa-miR-664a-3p	NM_001346897	EGFR	TATTCATTTATCCCCAGCCTACA#GGGGATGAAAGAATGC#(((((.(((((((((........#))))))))).))))).	3072	3088	0.923077	-18.4	0	2.63e-05	0.5	6.81617	4.15112	-6.07158	14	16	9	CDS		0	0
hsa-miR-1306-5p	NM_001346897	EGFR	CCACCTCCCCTGCAAACGTCCA#TGGACAAGTGCAACCTTCTGGAGGGTGAGCCAAGGGAGTTTGTGGA#(((((((((.((((...(((((#)))))...)))).....................)))))...)))).	1732	1778	0.846154	-20.6	1	0.0163469	0.441	2.71135	3.05559	-6.14858	18	46	5	CDS		0	0
hsa-miR-1306-3p	NM_001346897	EGFR	ACGTTGGCTCTGGTGGTG#CCACCAGAGTGATGTC#((((..((((((((((..#)))))))))).)))).	2801	2817	0.923077	-20.6	0	0.00156594	0.544	6.23612	6.04211	-9.95757	14	16	10	CDS		0	0
hsa-miR-513b-3p	NM_001346897	EGFR	AAATGTCACCTTTTTGAGAGGA#TCCCTCAAGGAGATAAGTGATG#....((((((((((((((.(((#))))))))))))....))))).	1479	1501	0.846154	-17.4	0	0.017413	0.603	4.54528	2.2743	-9.54656	17	22	12	CDS		0	0
hsa-miR-513c-5p	NM_001346897	EGFR	TTCTCAAGGAGGTGTCGTTTAT#ATAGACGACACCTTCCTCCCAGTGCCTGGTGAGT#..((((((((((((((((((((#))))))))))))).)))............)))).	3369	3403	1	-23.8	1	2.22e-06	0.441	2.69391	1.07356	-4.957	20	34	13	CDS		0	0
hsa-miR-513c-3p	NM_001346897	EGFR	TAAATTTCACCTTTCTGAGAAGA#TCTGGATCCCAGAAGGTGAGAA#....(((((((.(((((.((...#.)).)))))))))))).	2314	2336	0.826923	-16.3	0	0.000189711	0.544	6.63334	5.79159	-12.8934	14	17	12	CDS		0	1
hsa-miR-1321	NM_001346897	EGFR	CAGGGAGGTGAATGTGAT#CGCCTCCCTC#.(((((((((........#))))))))).	2919	2929	0.923077	-17.5	1	0.000177884	0.471	4.25179	5.41448	-13.0794	9	10	9	CDS		0	0
hsa-miR-1197	NM_001346897	EGFR	TAGGACACATGGTCTACTTCT#GGAAGTACGCAGACGCCGGCCATGTGTGCCA#..(((((((((((((((((((#)))))))..........)))))))))).)).	1948	1979	0.923077	-23.5	1	0.000407159	0.397	3.08891	3.24443	-4.957	19	31	10	CDS		0	0
hsa-miR-1324	NM_001346897	EGFR	CCAGACAGAATTCTATGCACTTTC#AGAGTGATGTCTGGA#(((((((..(((((..........#)))))..))))))).	2806	2821	0.896154	-17.4	1	3.5e-05	0.529	6.40764	5.36609	-8.2761	12	15	7	CDS		0	1
hsa-miR-1470	NM_001346897	EGFR	GCCCTCCGCCCGTGCACCCCG#TGGGGTGCAGGAGAGGAGA#...((((.(((.(((((((((#))))))))))).).)))).	723	742	1	-27	0	0.00128743	0.456	4.31149	3.42651	-12.175	16	19	11	CDS		0	0
hsa-miR-1537-5p	NM_001346897	EGFR	AGCTGTAATTAGTCAGTTTTCT#AGGCGCCTTGACTGAGGACAGCA#.(((((..((((((((......#.))))))))..))))).	3347	3370	1	-18.6	0	0.000359023	0.397	-0.149704	2.71696	-7.65065	13	17	8	CDS		0	0
hsa-miR-1538	NM_001346897	EGFR	CGGCCCGGGCTGCTGCTGTTCCT#AGGGCTGCTGGGGCCCGGAGCCC#.((((((((((.(.((.(.((((#))))).)).).))))))).))).	1663	1686	0.846154	-30.1	1	2.24e-08	0.294	3.57931	2.25471	-7.99697	18	23	7	CDS		0	0
hsa-miR-1539	NM_001346897	EGFR	TCCTGCGCGTCCCAGATGCCC#GGAGCTGCTGGGGTGCAGGAG#((((((((..(((((..((((#)).))..))))))))))))).	715	736	0.923077	-26.2	1	7.08e-05	0.456	3.59579	3.6603	-6.46952	17	21	13	CDS		0	0
hsa-miR-320d	NM_001346897	EGFR	AAAAGCTGGGTTGAGAGGA#CCTCTTACACCCAGTG#....((((((((((((((.#))))))).))))))).	2196	2212	0.846154	-21.8	0	0.00102832	0.426	4.99342	4.42593	-9.54656	14	16	7	CDS		0	0
hsa-miR-320d	NM_001346897	EGFR	AAAAGCTGGGTTGAGAGGA#CCTCCTCGACCCACTCAGCA#....((((((((((((((.#)))).))))))))....)).	3433	3453	0.846154	-19.9	0	0.0762233	0.412	-0.48274	0.356253	-9.54656	14	20	8	CDS		0	0
hsa-miR-1825	NM_001346897	EGFR	TCCAGTGCCCTCCTCTCC#AGTGGATGGCATTGGAA#(((((((((.(((.((..#)).))).))))))))).	2761	2778	0.923077	-21.1	1	0.000281296	0.574	6.15553	5.73242	-6.03692	14	17	9	CDS		0	0
hsa-miR-1908-5p	NM_001346897	EGFR	CGGCGGGGACGGCGATTGGTC#CGCCCGAGTCCCCGCCT#.(((((((((((((.......#))))...))))))))).	154	171	0.923077	-27.9	1	0.0051794	0.235	-0.432366	-0.149742	-4.76182	13	17	9	5UTR		0	0
hsa-miR-1909-3p	NM_001346897	EGFR	CGCAGGGGCCGGGTGCTCACCG#CGGCCGGAGTCCCGAGCTAGCCCCGGCGG#(((.(((((((((.((((.(((#)))...)))))))).....))))).))).	82	111	0.846154	-28.9	0	1.55e-08	0.162	-0.382295	-0.269913	-7.82644	19	29	8	5UTR		0	0
hsa-miR-1910-5p	NM_001346897	EGFR	CCAGTCCTGTGCCTGCCGCCT#AGGCCACAGGCCAGGTCTGC#.(((.((((.(((((..((((#))))..))))))))).))).	1624	1644	0.923077	-26.3	0	3.96e-05	0.368	-0.916664	2.47765	-9.38792	16	20	9	CDS		0	0
hsa-miR-1910-5p	NM_001346897	EGFR	CCAGTCCTGTGCCTGCCGCCT#GCGGAGGCTGCTGCAGGAGAGGG#((..((((((((((.((((..#))))))))....))))))..)).	2162	2185	1	-25.9	0	7.17e-05	0.368	3.83657	4.11474	-9.26259	16	23	8	CDS		0	0
hsa-miR-1911-3p	NM_001346897	EGFR	CACCAGGCATTGTGGTCTCC#AGACGACACCTTCCTCCCAGTGCCTGGTGA#((((((((((((.((.....#.)))))))))))))).	3371	3401	1	-25.2	1	6.66e-06	0.426	2.7793	1.63204	-5.45975	14	16	14	CDS		0	0
hsa-miR-1912-5p	NM_001346897	EGFR	CTCATTGCATGGGCTGTGTATA#ACGCAGCTCATGCC#......(((((((((((((...#))))))))))))).	2493	2507	0.846154	-22.9	0	0.000740737	0.353	5.1376	4.84379	-15.5666	13	14	13	CDS		0	0
hsa-miR-1912-3p	NM_001346897	EGFR	TACCCAGAGCATGCAGTGTGAA#CAAACTGCACCTACGGATGCACTGGGC#..(((((.(((((((((.((..#)).))))))........))).))))).	1990	2017	0.846154	-19.9	0	0.00213943	0.426	4.13039	2.39796	-7.27064	16	27	6	CDS		0	0
hsa-miR-1914-5p	NM_001346897	EGFR	CCCTGTGCCCGGCCCACTTCTG#CAGAGGTGAAAACAGCTGCAAGGCCACAGGCCAGGT#.((((.(((.((((((((((((#)))))))).............))))...))))))).	1604	1640	1	-26.7	0	2.19e-06	0.382	1.43666	3.01247	-6.93679	19	36	8	CDS		0	0
hsa-miR-1914-3p	NM_001346897	EGFR	GGAGGGGTCCCGCACTGGGAGG#CCTCCCAGTGCCTGGTGAGTGGCTTGTCTGGAAACAGTCCTGCTCCTCA#.(((((((((.(((((((((((#)))))))))))..))..........................))))))).	3383	3432	0.846154	-32.1	1	0.00835877	0.397	2.47033	0.80457	-6.6181	20	49	11	CDS		0	0
hsa-miR-1914-3p	NM_001346897	EGFR	GGAGGGGTCCCGCACTGGGAGG#TCCCACAGCAGGGCTTCTTCAGCAGCCCCTCCA#(((((((((((((..(((((..#)))))..)).)))...........)))))))).	3178	3211	0.846154	-30.5	1	0.00558997	0.368	4.49024	3.7433	-5.52986	18	33	8	CDS		0	0
hsa-miR-1915-5p	NM_001346897	EGFR	ACCTTGCCTTGCTGCCCGGGCC#GCCCAGGGACTGCGTCTCTTGCCGGAATGTCAGCCGAGGCAGGGA#.((((((((((((((((((((.#)))).)))......................)))).))))))))).	1682	1727	0.846154	-30.6	1	2.31e-05	0.397	2.42788	2.88861	-3.79332	20	45	9	CDS		0	0
hsa-miR-1915-3p	NM_001346897	EGFR	CCCCAGGGCGACGCGGCGGG#CCCGTCCATCGCCACTGGGA#.((((((((((.(.((((((#))))))).))))).))))).	2054	2074	0.807692	-30.5	1	8.93e-06	0.368	3.8895	1.91556	-7.99697	17	20	7	CDS		0	0
hsa-miR-1915-3p	NM_001346897	EGFR	CCCCAGGGCGACGCGGCGGG#CCCGGCGAGTCGGGCTCTGGAGGA#((((((((((((.((.((((#)))).)).)))..))))))).)).	317	341	1	-29.9	1	6.79e-05	0.397	0.172569	1.42461	-5.45975	18	24	7	CDS		0	0
hsa-miR-1972	NM_001346897	EGFR	TCAGGCCAGGCACAGTGGCTCA#GGGTTTTTGCTGATTCAGGCTTGGCCTGAA#(((((((((((.(((((((((.#)))))...))))......))))))))))).	1332	1362	0.846154	-26.7	1	7.77e-08	0.515	4.09037	4.0394	-7.28438	20	30	11	CDS		0	0
hsa-miR-1973	NM_001346897	EGFR	ACCGTGCAAAGGTAGCATA#GTGCTGGGCTCCGGTGCGTTCGGCACGGTG#(((((((.((.(((.(...#.).))).))..))))))).	2274	2304	0.923077	-18.5	1	0.000201854	0.441	6.2687	5.41015	-9.81143	13	19	7	CDS		0	0
hsa-miR-1976	NM_001346897	EGFR	CCTCCTGCCCTCCTTGCTGT#CGGCGAGTCGGGCTCTGGAGGA#(((((.((((..(((((((.#)))))))..))))...))))).	319	341	1	-26.9	0	6.79e-05	0.397	-0.630267	1.38325	-12.0101	16	22	7	CDS		0	0
hsa-miR-2115-5p	NM_001346897	EGFR	AGCTTCCATGACTCCTGATGGA#CCGGCAGGAGTCATGGGAGA#..(((((((((((((((.(((.#))).))))))))))))))).	1911	1931	1	-31.6	1	3.23e-06	0.412	2.60782	3.22889	-4.957	18	20	15	CDS		0	0
hsa-miR-2116-5p	NM_001346897	EGFR	GGTTCTTAGCATAGGAGGTCT#GGACCTCCATGCCTTTGAGAACCT#((((((((((((.((((((((#))))))))))))...)))))))).	1370	1394	0.961538	-28.8	1	0.0124425	0.471	4.07768	4.12305	-5.22671	20	24	12	CDS		0	0
hsa-miR-2116-3p	NM_001346897	EGFR	CCTCCCATGCCAAGAACTCCC#GGAGTCATGGGAGA#.((((((((......(((((.#))))))))))))).	1917	1931	0.961538	-19.7	1	3.23e-06	0.412	3.20009	3.26225	-14.0888	13	14	13	CDS		0	0
hsa-miR-2117	NM_001346897	EGFR	TGTTCTCTTTGCCAAGGACAG#GTCCTTGGGAATTTGGAAATTACCTATGTGCAGAGGAA#..((((((((.((((((((..#)))))))).))....................)))))).	441	479	0.846154	-19.2	1	0.000572997	0.603	3.68251	2.97148	-7.78178	16	38	8	CDS		0	0
hsa-miR-548q	NM_001346897	EGFR	GCTGGTGCAAAAGTAATGGCGG#CCGTCGCTTGGTGCACCGCG#((.((((((.((((...(((((#)))))))))..)))))))).	2615	2635	0.846154	-21.6	0	4.54e-05	0.412	6.06748	5.79885	-7.70612	17	20	9	CDS		0	0
hsa-miR-2276-5p	NM_001346897	EGFR	GCCCTCTGTCACCTTGCAGACG#TCTGGAGGGTGAGCCAAGGGA#.((((...(((((((.((((..#)))).)))))))....)))).	1748	1769	0.923077	-23.5	0	0.00235314	0.471	4.89729	2.79972	-9.78465	15	21	7	CDS		0	0
hsa-miR-2276-3p	NM_001346897	EGFR	TCTGCAAGTGTCAGAGGCGAGG#CCTCCATGCCTTTGAGAACCTAGAAATCATACGCGGCAGGA#(((((..(((((((((((((((#))))...))))))))................))).))))).	1373	1414	0.846154	-22	0	6.46e-05	0.529	4.27525	3.52747	-7.38222	20	41	8	CDS		0	0
hsa-miR-2277-5p	NM_001346897	EGFR	AGCGCGGGCTGAGCGCTGCCAGTC#GCTCCTGGCGCTGCTGGCTGCGCTCTGCCCGGCG#.((.(((((.((((((.((((((.#.)))))).)))))).))))))).	290	324	0.846154	-38.9	0	1.48e-06	0.338	-0.2191	0.0227263	-8.06785	19	23	7	CDS		0	0
hsa-miR-2277-3p	NM_001346897	EGFR	TGACAGCGCCCTGCCTGGCTC#AGCCGAGGCAGGGAATGCGTGG#...(((((((((((((((((.#)))).))))))))..))).)).	1713	1735	0.903846	-25.7	0	0.000117088	0.412	3.05715	3.61106	-6.51454	17	22	8	CDS		0	0
hsa-miR-2277-3p	NM_001346897	EGFR	TGACAGCGCCCTGCCTGGCTC#GGGCCAGGTCTTGAAGGCTGTCC#.((((((.....(((((((((#))))))))).......)))))).	2013	2036	1	-25.6	1	0.000319023	0.412	4.37666	2.19665	-14.5774	15	23	9	CDS		0	0
hsa-miR-2278	NM_001346897	EGFR	GAGAGCAGTGTGTGTTGCCTGG#CGGGGCAGCGCTCCTGGCGCTGCTGGCT#(..(((((((((((((((((.(#).))))))))).....))))))))..).	281	309	0.846154	-27.5	0	1.14e-06	0.221	0.0223219	0.487013	-6.65879	19	28	9	CDS		0	0
hsa-miR-2681-5p	NM_001346897	EGFR	GTTTTACCACCTCCAGGAGACT#CTTCTGGAGGGTGAGCCAAGGGAGTTTGTGGAGAACT#(((((.(((((((((((((...#))))))))))..................)))))))).	1746	1783	0.923077	-21.4	0	0.000154045	0.441	3.02124	2.90957	-5.83853	18	37	10	CDS		0	0
hsa-miR-2681-5p	NM_001346897	EGFR	GTTTTACCACCTCCAGGAGACT#TCCAGGAGGTGGC#......((((((((.(((....#))).)))))))).	505	518	0.923077	-20.8	0	1.82e-05	0.544	5.28038	3.13445	-16.302	11	13	8	CDS		0	0
hsa-miR-2681-3p	NM_001346897	EGFR	TATCATGGAGTTGGTAAAGCAC#TGCATTTGCCAAGTCCT#......(((.(((((((((((.#))).)))))))).))).	3085	3102	0.923077	-18.9	0	0.0143631	0.515	4.77528	4.88177	-16.8091	14	17	8	CDS		0	0
hsa-miR-2682-5p	NM_001346897	EGFR	CAGGCAGTGACTGTTCAGACGTC#GATGTCTGGAGCTACGGGGTGACTGTTTGG#((((((((.((((((((((((((#)))))))).))).....))).)))))))).	2811	2841	0.923077	-25.5	1	0.000331027	0.485	6.6131	5.61528	-4.99396	22	30	8	CDS		0	0
hsa-miR-2682-5p	NM_001346897	EGFR	CAGGCAGTGACTGTTCAGACGTC#TGTCTGGAAACAGTCCTGCTC#..(((((.(((((((((((((..#)))))))..))))))))))).	3407	3428	0.923077	-24.3	0	0.00182808	0.412	-0.496402	0.834031	-7.27064	18	21	11	CDS		0	0
hsa-miR-2682-3p	NM_001346897	EGFR	CGCCTCTTCAGCGCTGTCTTCC#GGAAGACGGCGTCCGCAAGTGTAAGAAGTGCGAAGGGCC#.(((.((((.((((((((((((#))))))))))))...................))))))).	1082	1121	1	-26.7	0	0.000699671	0.456	3.83236	4.03332	-9.15487	19	39	12	CDS		0	0
hsa-miR-711	NM_001346897	EGFR	GGGACCCAGGGAGAGACGTAAG#CTTGCAGTCGTCAGCCTGAACATAACATCCTTGGGATTACGCTCCCT#((((((((((((..((((((((#))))).)))..................)))))))).......)))).	1437	1484	0.846154	-22.8	1	1.29e-05	0.544	3.04766	3.17626	-6.08354	20	47	8	CDS		0	0
hsa-miR-711	NM_001346897	EGFR	GGGACCCAGGGAGAGACGTAAG#TGCGTCTCTTGCCGGAATGTCAGCCG#(((((((.(.((((((((((..#)))))))))).).))...)))..)).	1692	1718	0.846154	-22.4	1	0.000106092	0.368	3.1259	3.34739	-7.49372	18	26	10	CDS		0	0
hsa-miR-718	NM_001346897	EGFR	CTTCCGCCCCGCCGGGCGTCG#GGCAGCGCTCCTGGCGCTGCTGGCTGCGCTCTGCCCGGCGAGTCGGGCTCTGGAGGA#((((((((((((((((((...#.)))))))))....))))...))))).	284	341	0.897436	-31.8	1	6.79e-05	0.397	-0.141953	0.676311	-3.93757	18	27	9	CDS		0	0
hsa-miR-2861	NM_001346897	EGFR	GGGGCCTGGCGGTGGGCGG#CCGCCCGAGTCCCCGCCTCGCCGCCAACGCCACAACCACCGCGCACGGCCCCC#(((((((((((((((((((#.))))).))))))))....................)))))).	153	206	0.846154	-37.7	1	0.00260029	0.309	-0.315533	-0.16532	-3.93757	19	42	8	5UTR	MIRT731611	0	0
hsa-miR-2861	NM_001346897	EGFR	GGGGCCTGGCGGTGGGCGG#CCGTCCATCGCCACTGGGATGGTGGGGGCCCTC#(((((((((((((((((((#))))))))))))).............)))))).	2055	2088	0.846154	-34.4	1	7.57e-08	0.338	3.09234	2.25923	-3.93757	19	33	13	CDS	MIRT731611	0	0
hsa-miR-2909	NM_001346897	EGFR	GTTAGGGCCAACATCTCTTGG#CCAGGAGGTGGCTGGTTATGTCCTCATTGCCCTCAACA#((((((((((.((((((((((#))))))))))..))..............))))).))).	506	544	0.846154	-22.8	1	0.0141988	0.485	5.3695	3.19451	-6.76235	20	38	10	CDS		0	0
hsa-miR-3119	NM_001346897	EGFR	TGGCTTTTAACTTTGATGGC#GCTATCAAGGAATTAAGAGAAGCAACATCTCCGAAAGCCAA#((((((((..((((((((((#))))))))))......................)))))))).	2352	2393	0.846154	-18.7	1	0.00367451	0.574	5.84495	6.05399	-6.23647	18	41	10	CDS		0	0
hsa-miR-3120-3p	NM_001346897	EGFR	CACAGCAAGTGTAGACAGGCA#GCCACCCATATGTACCATCGATGTCTACATGATCATGGTCAAGTGCTGG#..(((((.((((((((((((.#)))..................))))))))).............))))).	2930	2979	0.846154	-18.1	0	0.00120926	0.544	5.69952	5.28994	-7.27064	17	49	9	CDS		0	0
hsa-miR-3122	NM_001346897	EGFR	GTTGGGACAAGAGGACGGTCTT#GGCTGCGCTCTGCCCGGCG#((((((.(.((((..(((((..#)))))..))))))))))).	305	324	1	-22.2	0	1.48e-06	0.338	-0.782865	1.28678	-8.12994	16	19	11	CDS		0	0
hsa-miR-3124-3p	NM_001346897	EGFR	ACTTTCCTCACTCCCGTGAAGT#GCTGTCCCAATGGGAGCTGCTGGGGTGCAGGAGAGG#.(((((((((((((.((..(((#.))))).)))))).))))))).	703	739	0.807692	-21.7	1	0.000188606	0.456	3.33014	3.51704	-4.52877	18	22	7	CDS		0	0
hsa-miR-3125	NM_001346897	EGFR	TAGAGGAAGCTGTGGAGAGA#CTGTCCCATCAAGGAAGACAGCTTCTTG#...(((((((((((((.((.#)).)))...........)))))))))).	3296	3324	0.846154	-18.6	0	3.71e-05	0.412	2.28829	2.3455	-6.51454	15	28	10	CDS		0	0
hsa-miR-3126-3p	NM_001346897	EGFR	CATCTGGCATCCGTCACACAGA#GTGGTGGATGCCGA#....(((((((((((((.....#))))))))))))).	3153	3167	0.923077	-21	0	0.000207749	0.441	2.97471	4.03361	-9.54656	13	14	13	CDS		0	0
hsa-miR-3126-3p	NM_001346897	EGFR	CATCTGGCATCCGTCACACAGA#TGACGGAATCCCTGCCAGC#...(((((((((((((......#))))))).....)))))).	2870	2889	0.846154	-19.2	0	0.0118478	0.471	4.99705	5.44185	-6.51454	13	19	7	CDS		0	0
hsa-miR-3127-5p	NM_001346897	EGFR	ATCAGGGCTTGTGGAATGGGAAG#TCCTACAGACTCCAACTTCTACCGTGCCCTGATG#((((((((..((((((((((...#.))))..))))))...)))))))).	3098	3132	0.846154	-23.7	1	0.00385296	0.471	3.4527	4.62105	-6.23647	18	25	8	CDS		0	0
hsa-miR-3127-5p	NM_001346897	EGFR	ATCAGGGCTTGTGGAATGGGAAG#TCCCGTCCATCGCCACTGGG#.(((((((..((((.((((((..#)))))))))).))).)))).	2053	2073	0.846154	-22.4	1	1.21e-05	0.368	2.75601	2.06873	-6.82767	17	20	10	CDS		0	0
hsa-miR-3127-5p	NM_001346897	EGFR	ATCAGGGCTTGTGGAATGGGAAG#TCTGGATCCACAGGAACTGG#..(((..((((((((.(.(((..#))).).))))))))..))).	1283	1303	1	-21.9	0	0.0001	0.559	3.13106	3.30734	-8.6347	15	20	8	CDS		0	0
hsa-miR-3127-3p	NM_001346897	EGFR	TCCCCTTCTGCAGGCCTGCTGG#CCAGCATCTCCAGAGGGGGAA#((((((((((.(((..((((((#))))))))).)))))))))).	3489	3510	0.923077	-29.4	1	1.01e-05	0.426	-0.247053	-0.666303	-7.73085	19	21	10	CDS		0	0
hsa-miR-3127-3p	NM_001346897	EGFR	TCCCCTTCTGCAGGCCTGCTGG#CCACATCGTTCGGAAGCGCACGCTGCGGAGGCTGCTGCAGGAGAGGGAG#(((((((((((((((((.(((.#.)))))))..))))))))).)))).	2138	2187	0.846154	-30.9	1	0.000150553	0.353	3.15065	3.50788	-3.93757	20	25	9	CDS		0	0
hsa-miR-3128	NM_001346897	EGFR	TCTGGCAAGTAAAAAACTCTCAT#GAGAGGAGAACTGCCAGAA#((((((.(((......(((((..#)))))....))))))))).	733	752	0.923077	-19.4	0	0.00782244	0.441	5.92255	3.57564	-14.7673	14	19	9	CDS		0	1
hsa-miR-3128	NM_001346897	EGFR	TCTGGCAAGTAAAAAACTCTCAT#GAGGGCTGCTGGGGCCCGGAGCCCAGGGACTGCGTCTCTTGCCGGAA#(((((((((........((((..#.))))........))))))))).	1662	1709	0.846154	-18.3	1	0.000881283	0.324	3.08215	2.23502	-14.4661	13	23	9	CDS		0	1
hsa-miR-3130-5p	NM_001346897	EGFR	TACCCAGTCTCCGGTGCAGCC#CTGCACCTACGGATGCACTGGGC#..(((((((((((((((((..#)))))))...))).).)))))).	1994	2017	1	-25	1	0.00213943	0.426	3.32768	2.25388	-4.957	17	23	7	CDS		0	0
hsa-miR-3130-5p	NM_001346897	EGFR	TACCCAGTCTCCGGTGCAGCC#GCTGTCCCAATGGGAGCTGCTGGGG#..((((((((((((.(((((.#))))).))....))))..)))))).	703	728	0.807692	-24.7	1	0.000264005	0.456	3.97011	3.44323	-5.69245	17	25	6	CDS		0	0
hsa-miR-3130-3p	NM_001346897	EGFR	GCTGCACCGGAGACTGGGTAA#AGCCAGTCTCCAGTGTCCAAGCC#(((((((.(((((((((.(..#).))))))))).))))...))).	3455	3478	0.923077	-25.8	1	0.114182	0.353	-0.277795	-0.791438	-6.25121	17	23	9	CDS		0	0
hsa-miR-3130-3p	NM_001346897	EGFR	GCTGCACCGGAGACTGGGTAA#TGCCTCACCTCCACCGTGCAGCT#(((((((.((((...(((((.#)))))...))))...))))))).	2466	2489	0.923077	-24.4	1	0.00336436	0.324	4.31709	5.06262	-9.13263	16	23	7	CDS		0	0
hsa-miR-3132	NM_001346897	EGFR	TGGGTAGAGAAGGAGCTCAGAGGA#CTGCTGGCTGCGCTCTGCCCGG#(((((((((..(.(((.(((.((.#)).)))))).).))))))))).	300	322	0.846154	-25.4	1	1.31e-05	0.324	-0.367459	1.25339	-9.29399	18	22	9	CDS		0	0
hsa-miR-3135a	NM_001346897	EGFR	TGCCTAGGCTGAGACTGCAGTG#ACTGCGTCTCTTGCCGGAATGTCAGCCGAGGCAG#(((((.(((((((((.(((((.#)))))))))).............)))).))))).	1690	1724	0.923077	-26.7	0	1.59e-05	0.397	2.33839	3.50397	-6.07158	19	34	10	CDS		0	0
hsa-miR-3135a	NM_001346897	EGFR	TGCCTAGGCTGAGACTGCAGTG#CATGGTCAGTTTTCTCTTGCAGTCGTCAGCCTGA#....((((((((((((((((..#.)))))))).)))))))).	1422	1456	0.923077	-26.3	0	0.00664056	0.515	3.31094	3.4267	-9.54656	16	19	8	CDS		0	0
hsa-miR-3135a	NM_001346897	EGFR	TGCCTAGGCTGAGACTGCAGTG#CACTGCGTCAAGACCTGCCCGGCAG#((((((((((..(((.((((((#))))))))).)).))))...)))).	1893	1918	0.846154	-22.6	1	7.14e-05	0.397	2.90121	3.36989	-10.3422	19	25	9	CDS		0	0
hsa-miR-466	NM_001346897	EGFR	ATACACATACACGCAACACACAT#GTGTGTGTGAGTGTTCATGATGTGTGTACATCTGTGTATGTGTGTGTGTGTATG#(((((((((((((((((((((((#.))))))))...........))))))))))))))).	3675	3729	0.846154	-29.9	1	0.160826	0.588	-0.432424	-0.263229	-3.93757	23	36	15	3UTR		0	0
hsa-miR-3136-5p	NM_001346897	EGFR	CTGACTGAATAGGTAGGGTCATT#GCTCTGCCCGGCGAGTCGGG#((((((.....((((((((....#)))))))).....)))))).	311	331	0.846154	-19.8	0	1.57e-07	0.353	-0.115248	1.10085	-12.9186	14	20	8	CDS		0	0
hsa-miR-544b	NM_001346897	EGFR	ACCTGAGGTTGTGCATTTCTAA#TGGAGATGTGATAATTTCAGGA#.((((((((((((((((((((.#))))))))).))))))))))).	1499	1521	1	-23.3	1	0.0106865	0.676	3.2581	2.70793	-3.79332	20	22	11	CDS		0	0
hsa-miR-544b	NM_001346897	EGFR	ACCTGAGGTTGTGCATTTCTAA#GAGTGCATACAGTGCCACCCAGAGTGCCTGCCTCAGGC#.((((((((.(.((((((....#.))))))).)))))))).	1785	1823	0.846154	-22.2	1	7.98e-07	0.397	2.54665	3.06668	-8.38263	15	18	8	CDS		0	0
hsa-miR-544b	NM_001346897	EGFR	ACCTGAGGTTGTGCATTTCTAA#GGGAATGCGTGGACAAGTGCAACCTTCTGGAGGGTG#((((((((((((((((((((..#))))))))..........)))))))).....)))).	1723	1759	0.846154	-20.3	1	0.000124759	0.441	3.55926	2.91396	-3.93757	20	36	8	CDS		0	0
hsa-miR-3137	NM_001346897	EGFR	TCTGTAGCCTGGGAGCAATGGGGT#GCCAGGTCTGCCATGCCTTGTGCTCCCCCGAGGGCTGCTGGGG#((((((((((((((((.(((((((#.)))))))))))))....))))))).))).	1633	1676	0.923077	-29.7	1	1.29e-07	0.279	2.40089	2.51444	-3.93757	23	30	13	CDS		0	0
hsa-miR-3137	NM_001346897	EGFR	TCTGTAGCCTGGGAGCAATGGGGT#CCCCAGTGACTGCTGCCACAACCAGTGTGCTGCAGGC#((((((((((((.((((.(((((.#))))).....)))).)))........).)))))))).	806	843	1	-26.1	1	0.000168075	0.324	4.48729	3.72952	-5.22671	21	37	8	CDS		0	0
hsa-miR-3138	NM_001346897	EGFR	TGTGGACAGTGAGGTAGAGGGAGT#CTCCCTCAGCCACCCATATGTACCATCGATGTCTACAT#((((((((.((((((((((((((.#))))))).............)))).))).)))))))).	2922	2960	0.923077	-27.6	1	0.00400549	0.5	4.79729	5.69028	-4.99396	22	38	8	CDS		0	0
hsa-miR-3138	NM_001346897	EGFR	TGTGGACAGTGAGGTAGAGGGAGT#ACTCCTTCACACATACTCCTCCTCTGGATCCACAG#(((((((((.((((..((((((((#)))))))).........))))..)))..)))))).	1261	1296	0.846154	-25.1	1	0.000144099	0.529	3.66285	3.25118	-6.14858	21	35	8	CDS		0	0
hsa-miR-3139	NM_001346897	EGFR	TAGGAGCTCAACAGATGCCTGTT#GCTGGGCATCTGCCTCACCTCCA#..((((.....(((((((((((.#)).)))))))))......)))).	2456	2479	0.846154	-20.3	0	0.0919184	0.324	6.05065	5.34103	-13.938	15	23	9	CDS		0	0
hsa-miR-3140-5p	NM_001346897	EGFR	ACCTGAATTACCAAAAGCTTT#GAAATCACAGGGTTTTTGCTGATTCAGGC#.(((((((((.((((((((((#.)))))))))).))))))))).	1323	1352	0.923077	-20.9	1	0.000326469	0.515	5.99858	3.19845	-6.6181	19	22	10	CDS		0	0
hsa-miR-3140-3p	NM_001346897	EGFR	AGCTTTTGGGAATTCAGGTAGT#ATGTGAACCCCGAGGGCA#.(((((((((..((((.((...#)).)))).))))))))).	958	976	0.846154	-18	1	5.34e-05	0.426	3.77867	4.20364	-9.9649	15	18	9	CDS		0	0
hsa-miR-3141	NM_001346897	EGFR	GAGGGCGGGTGGAGGAGGA#CCTCCTCGACCCACTCA#..(((.((((.(((((((.#))))))).)))).))).	3433	3450	0.961538	-28.3	0	0.146641	0.412	-0.702323	0.511243	-9.68273	14	17	7	CDS		0	0
hsa-miR-3141	NM_001346897	EGFR	GAGGGCGGGTGGAGGAGGA#TCTCCTCCATCCTGGAGAAAGGAGAACGCCTCCCTCA#(((((.((((((((((((.#))))))))))))...................))))).	2893	2930	1	-28.1	0	0.00114407	0.471	2.56941	5.39735	-5.83853	17	37	12	CDS		0	0
hsa-miR-3141	NM_001346897	EGFR	GAGGGCGGGTGGAGGAGGA#CAGCCTCCGCCCCCCGCA#(.(((.(((((((((..(.#)..)))))))))))).).	37	55	0.846154	-27.2	0	3.91e-05	0.147	0.0182753	-0.0329083	-7.23526	14	18	12	5UTR		0	0
hsa-miR-3142	NM_001346897	EGFR	AAGGCCTTTCTGAACCTTCAGA#TCTGGAGGAAAAGAAAGTTTGCCA#..(((((((((...((((((((#))))))))...))))))...))).	332	356	0.923077	-21.9	1	0.0394376	0.426	3.33295	1.25638	-10.4498	17	24	8	CDS		0	0
hsa-miR-3142	NM_001346897	EGFR	AAGGCCTTTCTGAACCTTCAGA#TGGAGGAAGACGGCGTCCGCAAGTGTAAGAAGTGCGAAGGGCCTTG#((((((((((.....((((...#.))))...)))))))))).	1078	1124	0.846154	-18.5	1	0.0001506	0.471	2.71836	3.86875	-12.9906	14	19	10	CDS		0	0
hsa-miR-3147	NM_001346897	EGFR	GGTTGGGCAGTGAGGAGGGTGTGA#TCGCCACTGGGATGGTGGGGGCCCTCCTCTTGCTGCTGGTGGTGGCCCTGGGGATCGGCCT#((((((((((((((((((((.(..#.).)))))))))..))))))..................))))).	2062	2123	0.846154	-30.1	1	9.47e-06	0.353	2.86697	2.4147	-3.93757	21	44	9	CDS		0	0
hsa-miR-3147	NM_001346897	EGFR	GGTTGGGCAGTGAGGAGGGTGTGA#TCATGCCCTTCGGCTGCCTCCTGGACTA#(((((((((((..(((((((((((#))))))))))).)))))))....)))).	2500	2528	0.923077	-29.8	1	5.03e-06	0.456	5.18861	4.85208	-8.57351	22	28	11	CDS		0	0
hsa-miR-3147	NM_001346897	EGFR	GGTTGGGCAGTGAGGAGGGTGTGA#ACACCTTCCTCCCAGTGCCTGGT#..(((((((.((((((((((((..#)))))))))))..).))))))).	3376	3399	1	-27.4	1	0.0001479	0.426	2.994	1.4066	-6.19951	19	23	11	CDS		0	0
hsa-miR-3150a-3p	NM_001346897	EGFR	CTGGGGAGATCCTCGAGGTTGG#CCTGCCAGCGAGATCTCCTCCAT#.(((((((((.((((.(((.((#)).)))..)))))))))).))).	2880	2903	0.807692	-23.8	1	0.000915491	0.412	2.44545	5.4206	-6.85115	18	23	10	CDS		0	0
hsa-miR-3150a-3p	NM_001346897	EGFR	CTGGGGAGATCCTCGAGGTTGG#TCAGCCTCCAGAGGATGTTCA#....(((.((((((((((((((#))))))))..)))))).))).	406	427	0.923077	-23.3	0	3.77e-05	0.574	2.42265	3.39589	-11.8602	17	21	8	CDS		0	0
hsa-miR-3150a-3p	NM_001346897	EGFR	CTGGGGAGATCCTCGAGGTTGG#GGCCCTGGGGATCGGCCTCT#..((((.((((((((.((((..#)))).))))))))..)))).	2105	2125	0.923077	-22.4	0	1.3e-05	0.368	2.28446	3.05327	-6.73374	16	20	8	CDS		0	0
hsa-miR-3151-5p	NM_001346897	EGFR	GGTGGGGCAATGGGATCAGGT#CCTGGTCTGGAAGTACGCAGACGCCGGCCATGTGTGCCACCT#(((((.((((((((((((((.#)))))))....................)))).))).))))).	1940	1982	0.846154	-25.3	0	0.00269777	0.397	2.71409	3.36932	-5.83853	19	42	7	CDS		0	0
hsa-miR-3151-3p	NM_001346897	EGFR	CCTGATCCCACAGCCCACCT#GGTGGGGGCCCTCCTCTTGCTGCTGGTGGTGGCCCTGGGGATCGGC#.((((((((.(((.(((((.#.)))))..))))))))))).	2075	2121	1	-26.1	1	1.02e-06	0.338	2.42315	2.00332	-5.89267	16	20	11	CDS		0	0
hsa-miR-3152-5p	NM_001346897	EGFR	ATTGCCTCTGTTCTAACACAAG#AGCAACAGAGGTGAA#.(((((((((((((........#)).))))))))))).	1599	1614	1	-15.7	1	0.0828925	0.515	1.27209	2.03426	-4.76182	13	15	11	CDS		0	0
hsa-miR-3153	NM_001346897	EGFR	GGGGAAAGCGAGTAGGGACATTT#TCCCTGCCAGCGAGATCTCCT#(((((..((..(((((((.....#)))))))..))....))))).	2878	2899	0.846154	-21.3	0	0.00160888	0.426	5.67485	5.25623	-11.4495	14	21	7	CDS		0	0
hsa-miR-3074-3p	NM_001346897	EGFR	GATATCAGCTCAGTAGGCACCG#CGTGTGCCGCCTGCTGGGCA#.......(((((((((((....#.))))))))))).	2444	2464	0.903846	-22.4	0	2.41e-06	0.324	4.36876	5.60331	-17.1102	11	13	11	CDS		0	0
hsa-miR-3154	NM_001346897	EGFR	CAGAAGGGGAGTTGGGAGCAGA#CTGCTCCTCAACCTCCTCG#.....((((((((((((((((.#))))))).)))).))))).	3422	3441	0.846154	-26.1	0	0.0338347	0.412	-0.955252	0.854525	-13.6656	16	19	7	CDS		0	0
hsa-miR-3154	NM_001346897	EGFR	CAGAAGGGGAGTTGGGAGCAGA#TCAGCAGCCCCTCCACGTCACGGACTCCCCTCCTGA#(((.((((((((((((.((...#.)))))...........))))))))).))).	3196	3232	1	-25.5	0	0.00065316	0.412	3.47897	3.30742	-6.9696	17	31	9	CDS		0	0
hsa-miR-3155a	NM_001346897	EGFR	CCAGGCTCTGCAGTGGGAACT#TCCCACAGCAGGGCTTC#..(((((((((.((((((...#)))))).))))))))).	3178	3195	0.846154	-26	1	0.000352631	0.368	4.65747	3.95922	-8.3038	15	17	9	CDS		0	0
hsa-miR-3156-5p	NM_001346897	EGFR	AAAGATCTGGAAGTGGGAGACA#CTCCCAACCAAGCTCTCTTGAGGATCTTG#.(((((((..(((((((((...#))))))..........)))..))))))).	2218	2247	0.846154	-18.2	1	0.000100917	0.588	4.71823	5.19747	-6.09222	16	29	7	CDS		0	0
hsa-miR-3156-3p	NM_001346897	EGFR	CTCCCACTTCCAGATCTTTCT#GGGCCTAAGATCCCGTCCATCGCCACTGGGATGGTGGGGGC#(((((((((((((........#.)))))..)))))))).	2043	2084	0.923077	-19.2	1	3.19e-06	0.324	1.7274	3.17593	-5.76291	13	17	8	CDS		0	0
hsa-miR-3157-5p	NM_001346897	EGFR	TTCAGCCAGGCTAGTGCAGTCT#GGCTGCGCTCTGCCCGGCGAGT#(((.(((.(((.(((((((((.#)))))))))..))).)))))).	305	327	0.846154	-27.1	0	3.94e-06	0.338	-0.258662	0.938278	-12.63	18	22	9	CDS		0	0
hsa-miR-3157-5p	NM_001346897	EGFR	TTCAGCCAGGCTAGTGCAGTCT#AGGCTGCACAGGCCCCCGGGAGAGCGACTGCCTGGTCTGC#..(((((((((..(((((((((#)))))))))....................)))))).))).	839	879	0.923077	-26.1	1	8.46e-05	0.338	5.24099	3.90304	-9.59293	18	40	9	CDS		0	0
hsa-miR-3158-5p	NM_001346897	EGFR	CCTGCAGAGAGGAAGCCCTTC#GAGGGCTGCTGGGGCCCGGAGCCCAGGGACTGCGTCTCTTGCCGGAATGTCAGCCGAGGCAGGG#((((((((((.(.((((((..#.)))).)).).)))))...................))))).	1662	1726	0.846154	-21.7	1	1.4e-05	0.397	3.40198	2.17897	-8.05148	17	41	5	CDS		0	0
hsa-miR-3158-3p	NM_001346897	EGFR	AAGGGCTTCCTCTCTGCAGGAC#GTTCGGAAGCGCACGCTGCGGAGGCTGCTGCAGGAGAGGGAGCTTG#..(((((((((((((((((.(.#.).)))))).))))))))))).	2145	2191	0.923077	-28.7	1	0.000340839	0.368	3.5056	3.74971	-4.957	18	22	11	CDS		0	0
hsa-miR-3158-3p	NM_001346897	EGFR	AAGGGCTTCCTCTCTGCAGGAC#GTCCCAATGGGAGCTGCTGGGGTGCAGGAGAGGAGAACTGCCAGAAACTGACCAAAATCATCTGTGCCCA#..((((((((((((((((((((#))))..................))))).)))))))..............................)))).	706	776	0.846154	-23.9	1	0.0390105	0.412	3.84574	3.10373	-4.957	20	70	7	CDS		0	0
hsa-miR-3159	NM_001346897	EGFR	TAGGATTACAAGTGTCGGCCAC#GGCCAAAAGTGTGATCCA#..((((((((......((((..#)))).....)))))))).	684	702	1	-19.4	1	0.00236902	0.456	3.42061	2.91673	-14.243	12	18	8	CDS		0	0
hsa-miR-3160-5p	NM_001346897	EGFR	GGCTTTCTAGTCTCAGCTCTCC#GGGAGTTGATGACCTTTGGATCCAAGCCA#(((((((((((((((((((((.#))))))))).)))...))))...))))).	2839	2868	0.923077	-24.3	1	0.00119927	0.485	6.11125	5.31587	-3.93757	21	29	9	CDS		0	0
hsa-miR-3160-5p	NM_001346897	EGFR	GGCTTTCTAGTCTCAGCTCTCC#GGAGGCTGCTGCAGGAGAGGGAGCTT#((((((((..((((((((((((#)))))..)))).)))..)))))))).	2164	2190	0.846154	-22.6	1	0.000313984	0.368	3.88819	4.01283	-6.23647	20	26	8	CDS		0	0
hsa-miR-3160-3p	NM_001346897	EGFR	AGAGCTGAGACTAGAAAGCCCA#TGGTCAGTTTTCTCTTGCAGTCGTCAGCCTG#((.(((((((((((((((((((#)))...))))))).....)))).))))))).	1424	1455	0.846154	-18.8	0	0.00646879	0.529	2.53866	3.93275	-5.49511	21	31	7	CDS		0	0
hsa-miR-3161	NM_001346897	EGFR	CTGATAAGAACAGAGGCCCAGAT#GTTTGGGACCTCCGGTCAGA#(((((.....(.(((((((((((#))))))).)))).)))))).	1565	1585	0.846154	-18.9	0	6.19e-05	0.618	2.63336	2.04261	-15.3416	17	20	7	CDS		0	0
hsa-miR-3162-5p	NM_001346897	EGFR	TTAGGGAGTAGAAGGGTGGGGAG#CTCCCCTCCTGAGCTCTCTGAG#(((((((((...((((.((((((#))))))))))..))))))))).	3220	3242	1	-27.9	1	0.000954245	0.397	3.57558	3.15842	-11.3517	19	22	10	CDS		0	0
hsa-miR-3162-3p	NM_001346897	EGFR	TCCCTACCCCTCCACTCCCCA#TGGGATGGTGGGGGCCCTCCTCTTGCTGCTGGTGGTGGC#.(((((((((((((((.((((#))))..))))))))................))))).)).	2069	2108	0.923077	-24.2	1	8.04e-06	0.324	2.54104	2.19942	-3.79332	19	39	8	CDS		0	0
hsa-miR-3163	NM_001346897	EGFR	TATAAAATGAGGGCAGTAAGAC#GTCCTCATTGCCCTCAA#.......((((((((((..(((#)))...)))))))))).	525	542	0.846154	-18.2	0	0.017864	0.485	3.27997	3.79858	-17.1102	13	17	10	CDS		0	0
hsa-miR-3164	NM_001346897	EGFR	TGTGACTTTAAGGGAAATGGCG#CGCGGCAGGACCAAGCAACATGGTCAGTTTTCTCTTGCAGTCGTCAG#(((((((.(((((((((((((.#.))))..))))))))).))))).)).	1404	1451	0.923077	-18.9	1	0.0299687	0.529	5.19055	2.9347	-6.25121	20	26	9	CDS		0	0
hsa-miR-3165	NM_001346897	EGFR	AGGTGGATGCAATGTGACCTCA#GAGGAAGACGGCGTCCGCA#..((((((((..(.(..((((.#)))).).)..)))))))).	1080	1099	0.846154	-20.6	1	3.79e-05	0.382	3.12029	3.87666	-12.2185	14	19	8	CDS		0	1
hsa-miR-1260b	NM_001346897	EGFR	ATCCCACCACTGCCACCAT#GTGGTGGCCCTGGGGA#...((.(((..((((((((#))))))))..))))).	2100	2116	0.923077	-21	0	1.2e-05	0.324	2.0903	3.00891	-12.4828	13	16	8	CDS		0	0
hsa-miR-1260b	NM_001346897	EGFR	ATCCCACCACTGCCACCAT#ATGGGCCTAAGATCCCGTCCATCGCCACTGGGATGGTGGGGG#.((((((((.(.(((....#.))).))))))))).	2041	2083	0.846154	-18.1	1	1.75e-06	0.324	1.38297	2.95814	-8.61568	12	15	9	CDS		0	0
hsa-miR-3168	NM_001346897	EGFR	GAGTTCTACAGTCAGAC#TTGACTGAGGACA#..(((((.(((((((..#)))))))))))).	3354	3367	0.923077	-14.9	0	0.000455108	0.412	0.04426	2.84249	-7.50368	12	13	12	CDS		0	0
hsa-miR-3169	NM_001346897	EGFR	TAGGACTGTGCTTGGCACATAG#GTGCCACCCAGAGTGCCTGC#(((((((.((..((((((....#))))))..)).))).)))).	1796	1816	0.923077	-21.1	1	4.53e-06	0.441	4.96378	2.89238	-12.4228	15	20	6	CDS		0	0
hsa-miR-3170	NM_001346897	EGFR	CTGGGGTTCTGAGACAGACAGT#ACTGTTTGGGACCTCCGGTCAGAAAACCAA#.(((..((((((..((((((((#))))))))..........))))))..))).	1562	1592	0.846154	-19.8	0	0.00314588	0.588	2.66098	2.02158	-11.9593	17	30	8	CDS		0	0
hsa-miR-3173-3p	NM_001346897	EGFR	AAAGGAGGAAATAGGCAGGCCA#TGGCTTGTCTGGAAACAGTCCTGCTCCTCAACCTCCTC#..((((((...(((((((((((#)))))))))))....................)))))).	3402	3440	0.923077	-23.4	1	0.0390366	0.412	0.579247	0.732839	-10.0807	17	38	11	CDS		0	0
hsa-miR-3173-3p	NM_001346897	EGFR	AAAGGAGGAAATAGGCAGGCCA#GGCATCTGCCTCACCTCCA#...(((((....(((((((((.#)))..))))))..))))).	2460	2479	0.846154	-23.2	0	0.0919184	0.324	6.21341	5.32123	-14.985	14	19	6	CDS		0	0
hsa-miR-1193	NM_001346897	EGFR	GGGATGGTAGACCGGTGACGTGC#GCCAGGTCTGCCATGCCT#((.(((((((((((((.......#))).)))))))))).)).	1633	1651	0.923077	-26.4	0	0.000102359	0.324	2.01026	2.77905	-5.49511	15	18	10	CDS		0	0
hsa-miR-1193	NM_001346897	EGFR	GGGATGGTAGACCGGTGACGTGC#CACGTCACGGACTCCCCTCCTG#((((.((.((.((.((((((((.#)))))))))).)).)).)))).	3209	3231	1	-24	0	0.000687785	0.426	3.03654	3.77567	-14.0519	18	22	10	CDS		0	0
hsa-miR-323b-5p	NM_001346897	EGFR	AGGTTGTCCGTGGTGAGTTCGCA#GCGAATTCCTTTGGAAAACCTG#(((((.((((.((.((((((((.#)))))))))).)))).))))).	551	573	1	-25	0	0.00603781	0.544	2.21577	3.94368	-9.52015	19	22	10	CDS		0	0
hsa-miR-323b-3p	NM_001346897	EGFR	CCCAATACACGGTCGACCTCTT#GGGGTGACTGTTTGGGA#(((((...((((((.(((((..#)))))))))))))))).	2826	2843	0.923077	-21.3	0	0.000224493	0.485	4.87161	5.408	-10.4313	16	17	16	CDS		0	0
hsa-miR-323b-3p	NM_001346897	EGFR	CCCAATACACGGTCGACCTCTT#GAGGTGGTCCTTGGGA#(((((.....((.(.(((((..#))))).).))))))).	435	451	0.846154	-18.6	0	4.68e-06	0.574	2.18604	3.10065	-14.0193	13	16	7	CDS		0	0
hsa-miR-3174	NM_001346897	EGFR	TAGTGAGTTAGAGATGCAGAGCC#GGGACTGCGTCTCTTGCCGG#...((.((.((((((((((..((#))..)))))))))).)))).	1687	1707	1	-20.6	0	0.00147674	0.324	3.71653	3.29653	-9.47189	16	20	10	CDS		0	0
hsa-miR-3174	NM_001346897	EGFR	TAGTGAGTTAGAGATGCAGAGCC#TCTGCAAAATTTCTAGCTTATG#..((((((((((((((((((...#))))))...)))))))))))).	3628	3650	0.923077	-20.7	1	0.0156376	0.647	-0.0103306	-0.615193	-4.957	18	22	12	3UTR		0	0
hsa-miR-3175	NM_001346897	EGFR	CGGGGAGAGAACGCAGTGACGT#GCGCTGCTGGCTGCGCTCTGCCCGG#((((.((((..((((((.(.((#.))).)))))))))).)))).	297	322	0.846154	-25.1	0	1.31e-05	0.324	0.923269	0.585196	-12.1239	17	21	10	CDS		0	0
hsa-miR-3176	NM_001346897	EGFR	ACTGGCCTGGGACTACCGG#CCGGAGCCCAGGGACTGCGTCTCTTGCCGGA#.((((((((((.((.((((#)))))))))))..............))))).	1677	1708	0.923077	-22	1	0.00123065	0.309	2.85793	2.87816	-7.87558	16	31	11	CDS		0	0
hsa-miR-3176	NM_001346897	EGFR	ACTGGCCTGGGACTACCGG#CGGATGCACTGGGCCAGG#.(((((((((..(..(((.#)))..)..))))))))).	2003	2021	0.846154	-22	1	0.000157476	0.426	2.38746	2.4044	-11.5572	13	18	9	CDS		0	0
hsa-miR-3177-5p	NM_001346897	EGFR	TGTGTACACACGTGCCAGGCGCT#GCGTTCGGCACGGTGTATAA#..(((((((.((((((.(((((.#))))).))))))))))))).	2289	2309	0.923077	-28	1	0.0152299	0.426	4.08251	5.71361	-6.19951	18	20	13	CDS		0	0
hsa-miR-3177-3p	NM_001346897	EGFR	TGCACGGCACTGGGGACACGT#GCCAGTCTCCAGTGTCCAAGCCAGGTGCT#.((((((((((((((((..((#))..))))))))))))........)))).	3456	3485	0.923077	-24.7	1	0.000822696	0.382	-0.862742	-0.731399	-3.79332	18	29	12	CDS		0	0
hsa-miR-3180-5p	NM_001346897	EGFR	CTTCCAGACGCTCCGCCCCACGTCG#GACCTGCCCGGCAGGAGTCATGGGAGAAAACAACACCCTGGTCTGGAAGT#(((((((((((((((((.((.(((.#))).))...))).)))))......................))))))))).	1904	1954	0.846154	-28.2	1	3.86e-05	0.412	3.38201	3.13945	-3.93757	22	50	9	CDS		0	0
hsa-miR-3180-5p	NM_001346897	EGFR	CTTCCAGACGCTCCGCCCCACGTCG#TGGCGCTGCTGGCTGCGCTCTGCCCGGCGAGTCGGGCTCTGGAGGA#((((((((.((((((((((((((((#)))))....))).............))))....)))))))))))).	295	341	0.846154	-26.2	1	6.79e-05	0.397	-0.21509	1.40199	-4.99396	24	46	12	CDS		0	0
hsa-miR-3181	NM_001346897	EGFR	ATCGGGCCCTCGGCGCCGG#CTGGCGCTGCTGGCTGCGCTCTGCCCGGC#.((((((((.(((((((((#)))))))))..)).........)))))).	294	323	0.846154	-26.4	1	2.06e-06	0.338	-0.0212873	0.241989	-5.03583	17	29	9	CDS		0	0
hsa-miR-3182	NM_001346897	EGFR	GCTTCTGTAGTGTAGTC#GGCGCCACATCGTTCGGAAGCGCACGCTGCGGAGGCT#(((((((((((((.((.#.))))))))))))))).	2134	2171	0.923077	-21.7	1	1.12e-06	0.338	2.73717	3.27694	-4.79441	15	17	15	CDS		0	0
hsa-miR-3183	NM_001346897	EGFR	GCCTCTCTCGGAGTCGCTCGGA#TCCAGCATCTCCAGAGGGGG#.(((((((.((((..(((.(((#))))))..))))))))))).	3488	3508	1	-25.9	1	5.59e-06	0.426	-0.204601	-0.582713	-6.442	17	20	11	CDS		0	0
hsa-miR-3184-3p	NM_001346897	EGFR	AAAGTCTCGCTCTCTGCCCCTCA#TGGGGTGCAGGAGAGGAGAACTG#..((((((.((((((((.(((((#))))).)))).)))))))).)).	723	746	0.923077	-24.1	1	0.00173229	0.441	1.74817	3.45182	-6.01339	19	23	8	CDS		0	0
hsa-miR-3185	NM_001346897	EGFR	AGAAGAAGGCGGTCGGTCTGCGG#CTGCAGGCTGCACAGGCCCCCGGGAGAGCGACTGCCTGGTCTG#(((...(((((((((.(((.(((#.)))..))).)))))))))..))).	835	878	0.923077	-27	0	3.16e-05	0.338	4.81136	4.02203	-13.2226	18	25	9	CDS		0	0
hsa-miR-3185	NM_001346897	EGFR	AGAAGAAGGCGGTCGGTCTGCGG#CTGGGGATCGGCCTCTTCA#....(((((.(((((((((.(((#))).)))))))))))))).	2109	2128	1	-24.6	0	0.00034499	0.353	1.78101	3.10753	-10.7891	17	19	14	CDS		0	0
hsa-miR-3186-5p	NM_001346897	EGFR	CAGGCGTCTGTCTACGTGGCTT#AAGCCACGTGCAAGGACACCTGC#((((.((((...((((((((((#))))))))))...)))).)))).	895	918	0.923077	-27.6	0	0.000262376	0.397	2.9534	3.71861	-15.4707	18	23	10	CDS		0	0
hsa-miR-3186-5p	NM_001346897	EGFR	CAGGCGTCTGTCTACGTGGCTT#GGCCATGTGTGCCACCTGTGCCATCCAAACTGCACCTACGGATGCACTGG#(((((((((((((((((((((.#))))))))).)..........................)))))))).))).	1965	2015	1	-23.6	1	0.000270634	0.426	2.7935	2.50806	-3.93757	21	50	9	CDS		0	0
hsa-miR-3186-3p	NM_001346897	EGFR	TCACGCGGAGAGATGGCTTTG#CGGAGCGAGCTCTTCGGGGAG#((.(.(((((((.(.((((((#)))))).).))))))).))).	235	256	0.846154	-21	0	0.000137614	0.309	-0.553968	-0.115248	-11.6387	17	21	7	5UTR		0	0
hsa-miR-3189-5p	NM_001346897	EGFR	TGCCCCATCTGTGCCCTGGGTAGGA#CCTGCCTCAGGCCATGAACATCACCTGCACAGGACGGGGA#..((((.(((((((((((((((((.#)))))).))))...............)))))))..)))).	1811	1851	0.846154	-32.4	0	5.66e-05	0.426	2.67817	2.97501	-6.50069	21	40	7	CDS		0	0
hsa-miR-320e	NM_001346897	EGFR	AAAGCTGGGTTGAGAAGG#CCTCCTCGACCCACTCAGCA#...(((((((((((.(((#))).)))))))))....)).	3433	3453	1	-19	0	0.0762233	0.412	-0.475908	0.0975101	-7.24999	14	20	9	CDS		0	0
hsa-miR-3190-5p	NM_001346897	EGFR	TCTGGCCAGCTACGTCCCCA#GGAGGTGGCTGGTTAT#..(((((((((((.(((...#))).))))))))))).	509	525	1	-24.3	1	5.56e-06	0.485	4.31803	3.18808	-5.81384	14	16	11	CDS		0	0
hsa-miR-3191-5p	NM_001346897	EGFR	CTCTCTGGCCGTCTACCTTCCA#TGGAGGGTGAGCCAAGGGAGT#(((((((((..((.((((((((#)))))))))))))).))))).	1750	1771	1	-24.6	1	0.00368078	0.471	3.90612	2.93491	-8.8617	19	21	14	CDS		0	0
hsa-miR-3191-3p	NM_001346897	EGFR	TGGGGACGTAGCTGGCCAGACAG#TGATCTTTCCTTCTTAAAGACCATCCAGGAGGTGGCTGGTTATGTCCTCAT#((((((((((((((((((.....#.)))))))))))))))))).	482	533	0.846154	-29.8	1	0.00209653	0.5	3.6091	4.14804	-3.93757	18	20	18	CDS		0	0
hsa-miR-3192-5p	NM_001346897	EGFR	TCTGGGAGGTTGTAGCAGTGGAA#CCACTGCGTCAAGACCTGCCCGGC#.((((((((((...(((((((..#))))))).....))))).))))).	1892	1916	0.846154	-28.1	1	6.41e-05	0.397	3.27451	3.31076	-9.2861	17	24	7	CDS		0	1
hsa-miR-3192-3p	NM_001346897	EGFR	CTCTGATCGCCCTCTCAGCTC#GAGGCAGGGAATGCGTGGACAAGTGCAACCTTCTGGAGGGTGAGCCAAGGGA#((((..((((((((.(((...#.)))))))))))....)))).	1717	1769	1	-21.7	0	0.00235314	0.471	1.354	3.32309	-10.693	15	21	11	CDS		0	0
hsa-miR-3193	NM_001346897	EGFR	TCCTGCGTAGGATCTGAGGAGT#CTGCCTCAGGCCATGAACATCACCTGCACAGGAC#(((((.(((((.(((((((((.#)).)))))))............))))).))))).	1812	1846	1	-23.4	0	0.00452104	0.412	1.96173	2.83385	-9.18534	19	34	7	CDS		0	0
hsa-miR-3193	NM_001346897	EGFR	TCCTGCGTAGGATCTGAGGAGT#ACTCCTCCTCTGGATCCACAGGAA#(((((....(((((((((((((#)))))))....)))))).))))).	1275	1299	0.846154	-23.5	0	0.000268899	0.559	2.65876	3.45561	-10.7522	18	24	7	CDS		0	0
hsa-miR-3194-5p	NM_001346897	EGFR	GGCCAGCCACCAGGAGGGCTG#GGCCCTCCTCTTGCTGCTGGTGGTGGCCC#(((((.((((((((((((((.#))))))))).........)))))))))).	2081	2110	0.846154	-35	0	8.45e-06	0.309	2.21029	2.04399	-5.83853	19	29	10	CDS		0	0
hsa-miR-3195	NM_001346897	EGFR	CGCGCCGGGCCCGGGTT#CTGGGCTCCGGTGCGT#((((((((((((((...#)))))).)))))))).	2277	2293	0.923077	-29.5	1	3.55e-07	0.485	5.51204	5.49304	-4.90607	14	16	8	CDS		0	0
hsa-miR-3198	NM_001346897	EGFR	GTGGAGTCCTGGGGAATGGAGA#CTCCTCCTCTGGATCCACA#(((((.(((.(((((..((((.#))))))))).)))))))).	1276	1295	0.923077	-25.1	0	0.000105128	0.515	0.240594	3.12164	-7.31409	17	19	9	CDS		0	0
hsa-miR-3199	NM_001346897	EGFR	AGGGACTGCCTTAGGAGAAAGTT#ATTTTCTCAGCCTCCAGAGGATGTTCAATAACTGTGAGGTGGTCCTTG#(((((((((((((((((......#.))))...................))))))))))))).	400	448	0.846154	-21.9	1	6.64e-05	0.529	3.01161	3.08214	-3.93757	17	38	13	CDS		0	0
hsa-miR-3200-5p	NM_001346897	EGFR	AATCTGAGAAGGCGCACAAGGT#GCCATGTGTGCCACCTGTGCCATCCAAACTGCACCTACGGATG#.(((((((..((((((((.(((#))).))))))))..)).....................))))).	1966	2009	0.846154	-19.5	1	0.000247929	0.426	2.57851	3.1944	-6.09222	18	43	8	CDS		0	0
hsa-miR-514b-5p	NM_001346897	EGFR	TTCTCAAGAGGGAGGCAATCAT#GCCTCCCTCA#.......(((((((((......#))))))))).	2920	2930	0.846154	-21.4	0	0.00114407	0.471	3.77954	5.53082	-17.1102	9	10	9	CDS		0	0
hsa-miR-514b-5p	NM_001346897	EGFR	TTCTCAAGAGGGAGGCAATCAT#GATTACGCTCCCTCAAGGAGAT#.((((..((((((((.((((..#)))).).)))))))...)))).	1471	1493	0.923077	-21	0	1.75e-05	0.588	4.00516	2.70517	-7.47102	16	22	7	CDS		0	0
hsa-miR-378c	NM_001346897	EGFR	ACTGGACTTGGAGTCAGAAGAGTGG#CTGACTCCGTCCAGTA#(((((((..((((((((........#))))))))))))))).	205	221	0.923077	-25.3	1	0.0102711	0.338	-0.0151058	-0.305519	-7.3076	15	16	15	5UTR		0	0
hsa-miR-4293	NM_001346897	EGFR	CAGCCTGACAGGAACAG#TGTGCTGCAGGCTGC#(((((((.(((..(((.#))).)))))))))).	831	846	0.923077	-17.9	1	1.44e-05	0.324	4.70825	3.92938	-10.8871	13	15	10	CDS		0	0
hsa-miR-4293	NM_001346897	EGFR	CAGCCTGACAGGAACAG#GTGCCTGCCTCAGGCC#..((((((((((.((..#)).))))..)))))).	1808	1824	0.846154	-17.1	1	9.17e-07	0.382	2.49768	2.95433	-6.47918	12	16	6	CDS		0	0
hsa-miR-4294	NM_001346897	EGFR	GGGAGTCTACAGCAGGG#CCCTCCACGTCACGGACTCCCC#((((((((...((((((#))))....))...)))))))).	3204	3226	0.846154	-18.2	1	0.0040089	0.382	3.63513	3.62393	-9.06125	14	22	8	CDS		0	0
hsa-miR-4301	NM_001346897	EGFR	TCCCACTACTTCACTTGTGA#TCAATAACTGTGAGGTGGTCCTTGGGAA#((((((((((((((..((..#.)).))))))))))....)))).	424	452	0.923077	-19.3	1	4.25e-06	0.574	3.60227	2.86629	-4.90607	16	23	10	CDS		0	0
hsa-miR-4298	NM_001346897	EGFR	CTGGGACAGGAGGAGGAGGCAG#CTCCTCCTCTGGATCCACAGG#(((((((.((((((((((....#)))))))))).).))).))).	1276	1297	0.923077	-27.3	1	0.000240172	0.544	1.57112	3.33756	-6.25121	17	21	10	CDS		0	0
hsa-miR-4300	NM_001346897	EGFR	TGGGAGCTGGACTACTTC#AGTGGAGAAGCTCCCAA#((((((((...(((((..#)))))...)))))))).	2208	2225	1	-20.2	1	4.09e-05	0.485	4.5152	4.8101	-9.06125	13	17	8	CDS		0	0
hsa-miR-4304	NM_001346897	EGFR	CCGGCATGTCCAGGGCA#TGCCCTTCGGCTGCCTCCTGGACTATGTCCGGG#(((((((((((((((((#.))))..)))))).))).)))).	2503	2536	0.846154	-25	1	4.24e-08	0.456	5.26439	4.76587	-3.93757	17	23	6	CDS		0	0
hsa-miR-4305	NM_001346897	EGFR	CCTAGACACCTCCAGTTC#AACTGTGAGGTGGTCCTTGGGA#(((((((((((((((((.#))))).)))))).))..)))).	429	451	0.923077	-19.4	1	4.68e-06	0.574	3.87054	2.75114	-3.93757	17	22	6	CDS		0	0
hsa-miR-4305	NM_001346897	EGFR	CCTAGACACCTCCAGTTC#GGAGGTGGCTGGT#.((((.(((((((.....#))))))).)))).	509	522	0.865385	-18.7	0	3.38e-06	0.515	6.27028	3.01936	-7.51962	11	13	7	CDS		0	0
hsa-miR-4309	NM_001346897	EGFR	CTGGAGTCTAGGATTCCA#GGAAACTGAATTCAAAAAGATCAAAGTGCTGGGCTCCGGT#(((((((((((.(((...#.))).))))))))))).	2249	2289	0.846154	-20.6	1	2.55e-05	0.5	5.747	5.39499	-7.51743	14	17	11	CDS		0	0
hsa-miR-4309	NM_001346897	EGFR	CTGGAGTCTAGGATTCCA#AGTCCTACAGACTCCAA#.((((((((((((((...#))))))..)))))))).	3096	3113	0.846154	-18.6	1	0.0101494	0.529	3.60092	4.75199	-4.02637	14	17	8	CDS		0	0
hsa-miR-4308	NM_001346897	EGFR	TCCCTGGAGTTTCTTCTT#GGGGCCCGGAGCCCAGGGAC#(((((((.(((((.....#.)))))))))))).	1672	1692	0.923077	-19.2	1	8.6e-06	0.279	1.40087	2.43847	-8.07655	12	14	12	CDS		0	0
hsa-miR-4310	NM_001346897	EGFR	GCAGCATTCATGTCCC#GGACTGAAGGAGCTGCC#(((((.((((.((((.#))))))))...))))).	651	668	0.846154	-17.1	0	0.000390191	0.574	4.03446	2.24584	-8.89636	13	17	8	CDS		0	0
hsa-miR-4312	NM_001346897	EGFR	GGCCTTGTTCCTGTCCCCA#TGGGGTGCAGGAGAGGAGAACTGCCA#((((((.((((((((((((#))))).)))))))..)))....))).	723	749	0.846154	-23.7	0	0.00725094	0.441	3.8425	3.55984	-5.48126	18	26	7	CDS		0	0
hsa-miR-4315	NM_001346897	EGFR	CCGCTTTCTGAGCTGGAC#CAGCTCAGACCCCACAGGCGC#.((((((((((((((...#)))))))))......))))).	3332	3353	0.923077	-19.7	1	0.0105466	0.426	3.58542	2.54404	-4.02637	14	21	9	CDS		0	0
hsa-miR-4315	NM_001346897	EGFR	CCGCTTTCTGAGCTGGAC#TCTAGCTTATGAAGCA#..(((((.(((((((((.#))))))))).))))).	3639	3655	0.846154	-18.6	0	0.014023	0.632	0.203866	-0.524647	-7.27064	14	16	9	3UTR		0	0
hsa-miR-4314	NM_001346897	EGFR	CTCTGGGAAATGGGACAG#CCCGGAGCCCAGGGA#(((((((...((((....#))))...))))))).	1676	1691	0.923077	-19.6	1	4.56e-06	0.279	1.10087	2.70261	-9.5186	11	15	7	CDS		0	0
hsa-miR-4314	NM_001346897	EGFR	CTCTGGGAAATGGGACAG#GTGCCACCCAGAGT#(((((((...(((.((..#)).)))))))))).	1796	1810	0.980769	-18.8	1	0.00674178	0.441	4.6738	2.97341	-9.40695	12	14	10	CDS		0	0
hsa-miR-4318	NM_001346897	EGFR	CACTGTGGGTACATGCT#TGTGCCCAGCAGTGC#(((((((((((((....#)))))))).))))).	768	783	0.923077	-19.8	1	1.53e-05	0.382	5.36659	3.97185	-5.76291	13	15	8	CDS		0	0
hsa-miR-4320	NM_001346897	EGFR	GGGATTCTGTAGCTTCCT#GAGGCGGCCGGAGTCCCG#(((((((((..(((((..#)))))...))))))))).	78	96	0.846154	-22.3	1	1.03e-08	0.162	0.0479487	-0.157531	-8.00486	14	18	9	5UTR		0	0
hsa-miR-4320	NM_001346897	EGFR	GGGATTCTGTAGCTTCCT#GGAGCTACGGGGTGACT#(..(((((((((((((..#)))))))))))))..).	2818	2835	0.884615	-18.8	0	0.000859685	0.5	7.25285	5.48084	-6.65879	14	17	13	CDS		0	0
hsa-miR-4321	NM_001346897	EGFR	TTAGCGGTGGACCGCCCTGCG#CGCAAAGGGCATGAACTACTTGGAGGACCGTCGCTTGGTGCACCGCG#...((((((.(((((((((((#))))..))))..........................))).)))))).	2588	2635	0.846154	-26.3	0	4.54e-05	0.412	5.60586	5.04931	-7.75705	17	47	6	CDS		0	0
hsa-miR-4323	NM_001346897	EGFR	CAGCCCCACAGCCTCAGA#TCTGCCATGCCTTGTGCTCCCCCGAGGGCTGCTGGGGCC#..((((((((((((....#.)))))).)))))).	1639	1678	0.846154	-23.9	1	6.59e-08	0.279	1.93453	2.77858	-5.9255	12	15	6	CDS		0	0
hsa-miR-4257	NM_001346897	EGFR	CCAGAGGTGGGGACTGAG#CTCGTCGGCGTCCGCCCGAGTCCCCGCCTCG#...((((((((((((...#.)))))))))))).	142	173	0.923077	-26.3	0	0.00131844	0.221	-0.441639	-0.149742	-6.74759	12	14	12	5UTR		0	0
hsa-miR-4258	NM_001346897	EGFR	CCCCGCCACCGCCTTGG#TGGGGGCCCTCCTCTTGCTGCTGGTGGTGGCCCTGGGGA#(((((((((((((....#.)))))))))...)))).	2077	2116	0.826923	-26.4	1	1.2e-05	0.324	3.09581	1.93881	-5.76291	13	18	9	CDS		0	0
hsa-miR-4259	NM_001346897	EGFR	CAGTTGGGTCTAGGGGTCAGGA#TCCTCCTCTGGATCCACAGGAACTGG#((((((((((((((((..((((#)))))))))))))))).....)))).	1277	1303	0.923077	-25.4	1	0.0001	0.559	3.0819	3.40389	-3.93757	20	26	16	CDS		0	0
hsa-miR-4260	NM_001346897	EGFR	CTTGGGGCATGGAGTCCCA#GGACCTCCATGCCTTTGAGA#(((((((((((((((((..#)))).)))))))))).))).	1370	1390	0.923077	-23.6	1	0.00854615	0.471	3.16707	4.27424	-3.93757	17	20	10	CDS		0	0
hsa-miR-4260	NM_001346897	EGFR	CTTGGGGCATGGAGTCCCA#GGGACTCTGGATCCCAGA#.((((((..(((((((((.#)))))))))..)))))).	2309	2327	1	-23.8	1	5.44e-05	0.5	6.32695	5.52538	-7.16335	15	18	9	CDS		0	0
hsa-miR-4253	NM_001346897	EGFR	AGGGCATGTCCAGGGGGT#GCCCTTCGGCTGCCTCCTGGACTATGTCCG#.(((((((((((((((((#.))))))))))).)))))).	2504	2534	0.871795	-30.6	1	7.03e-06	0.441	5.10019	4.7493	-3.79332	17	20	11	CDS		0	0
hsa-miR-4252	NM_001346897	EGFR	GGCCACTGAGTCAGCACCA#TGCTGATTCAGGCTTGGCCT#((((((((((((((((...#)))))))))))...))))).	1339	1359	0.923077	-26.2	1	4.08e-06	0.515	4.5618	3.88713	-3.93757	16	20	11	CDS		0	0
hsa-miR-4325	NM_001346897	EGFR	TTGCACTTGTCTCAGTGA#CAGGGAATGCGTGGACAAGTGCAAC#((((((((((((..((..#.))..)))))))))))).	1721	1746	0.974359	-19.6	1	0.000488208	0.441	3.62903	2.71807	-6.08354	14	18	12	CDS		0	0
hsa-miR-4325	NM_001346897	EGFR	TTGCACTTGTCTCAGTGA#TCAAGGAGATAAGTGA#...((((((((((..(((#)))..)))))))))).	1483	1499	0.923077	-17.3	0	0.00857808	0.603	4.88163	2.43864	-8.10683	13	16	10	CDS		0	0
hsa-miR-4326	NM_001346897	EGFR	TGTTCCTCTGTCTCCCAGAC#GTCCTTGGGAATTTGGAAATTACCTATGTGCAGAGGAATT#.((((((((((.((((((((#)))..)))))...................)))))))))).	441	481	1	-19.8	1	0.000937407	0.618	1.58376	4.09581	-7.14013	18	40	10	CDS		0	0
hsa-miR-4265	NM_001346897	EGFR	CTGTGGGCTCAGCTCTGGG#CCCGAGGGCTGCTGGGGCCCGGAGCCCAGGGA#((.((((((((((((((((#))).))))))...........))))))).)).	1659	1691	0.923077	-27	0	4.56e-06	0.279	3.89466	1.95853	-5.49511	18	32	7	CDS		0	0
hsa-miR-4265	NM_001346897	EGFR	CTGTGGGCTCAGCTCTGGG#CCGGAGCGAGCTCTTCGGG#(((.((((((.(((((((.#)))))))))))))..))).	234	253	1	-25.3	0	0.000195314	0.324	-0.503102	-0.141953	-9.79437	16	19	13	5UTR		0	0
hsa-miR-4265	NM_001346897	EGFR	CTGTGGGCTCAGCTCTGGG#CCCAGAGTGCCTGCCTCAGG#(((.((((...((((((((#))))))))....))))))).	1802	1822	0.923077	-23.9	0	7.02e-07	0.397	4.09575	2.99462	-12.0933	15	20	8	CDS		0	0
hsa-miR-4267	NM_001346897	EGFR	TCCAGCTCGGTGGCAC#GCCACTGGGATGGT#.(((.(((((((((..#))))))))).))).	2064	2078	0.846154	-20.6	0	2.59e-06	0.353	3.28766	1.97174	-8.88086	12	14	9	CDS		0	0
hsa-miR-4268	NM_001346897	EGFR	GGCTCCTCCTCTCAGGATGTG#ACCTTCTGGAGGGTGAGCCA#(((((.(((((.(((((.((.#)).)))))))))).))))).	1744	1764	1	-24.6	0	0.000318202	0.471	1.76088	2.71601	-9.18534	17	20	10	CDS		0	0
hsa-miR-4268	NM_001346897	EGFR	GGCTCCTCCTCTCAGGATGTG#GCATCTCCAGAGGGGGAAACA#(..(((((((((..((((((.#))))))..)))))))))..).	3492	3513	0.923077	-24.4	0	0.000140123	0.412	-0.266409	-0.659898	-8.80476	16	21	9	CDS		0	0
hsa-miR-4263	NM_001346897	EGFR	ATTCTAAGTGCCTTGGCC#GCCAAGGCACGAGTA#((((...((((((((((.#)))))))))))))).	352	367	0.846154	-20.9	0	0.000466845	0.5	4.72331	1.22488	-11.5013	14	15	14	CDS		0	0
hsa-miR-4264	NM_001346897	EGFR	ACTCAGTCATGGTCATT#GACCCCACAGGCGCCTTGACTGAGG#.((((((((.(((....#.))).)))))))).	3339	3364	0.923077	-18	1	0.000126561	0.412	2.46334	2.63242	-6.86117	11	14	8	CDS		0	0
hsa-miR-4270	NM_001346897	EGFR	TCAGGGAGTCAGGGGAGGGC#CCCCTCCTGAGCTCTCTGAG#(((((((((((((((.(((.#)))))))))).)))))))).	3222	3242	1	-29.3	1	0.000954245	0.397	3.01802	3.18408	-4.17062	18	20	10	CDS		0	0
hsa-miR-4273	NM_001346897	EGFR	GTGTTCTCTGATGGACAG#CTGTCCCATCAAGGAAGACA#((.((((.((((((((((#)))))).)))).)))).)).	3296	3316	0.923077	-20	0	0.000442014	0.485	1.18476	2.46719	-7.80875	16	20	6	CDS		0	0
hsa-miR-4281	NM_001346897	EGFR	GGGTCCCGGGGAGGGGGG#CTCCTCCTCTGGATCCA#((((((.(((((((((..#))))))))).)))))).	1276	1293	0.923077	-28.6	0	0.000337066	0.529	1.52524	3.24294	-5.48126	15	17	9	CDS		0	0
hsa-miR-4277	NM_001346897	EGFR	GCAGTTCTGAGCACAGTACAC#AGTGTGCTGCAGGCTGCA#((((.((((((((((.(....#).)))))).)))))))).	829	847	1	-21	0	1.54e-05	0.324	4.42703	3.76408	-8.28966	15	18	8	CDS		0	0
hsa-miR-4278	NM_001346897	EGFR	CTAGGGGGTTTGCCCTTG#GGCTGCCTCCTGGA#(((((((((..(((....#))).))))))))).	2511	2525	1	-20.2	1	8.24e-06	0.456	5.05598	4.77748	-8.97335	12	14	9	CDS		0	0
hsa-miR-4280	NM_001346897	EGFR	GAGTGTAGTTCTGAGCAGAGC#GCTCCTGGCGCTGCTGGCTGCGCTCT#((((((((((...(((((.((#.)).))))))))))))))).	290	316	0.923077	-23.1	1	8.33e-06	0.25	0.463354	0.576114	-11.3983	17	20	15	CDS		0	0
hsa-miR-4285	NM_001346897	EGFR	GCGGCGAGTCCGACTCAT#GAGTCGGGCTCTGGAGGAAAAGAAAGTTTGCCAAGGCA#((((((((((((((((..#)))))))))))..................)))...)).	323	361	1	-24	1	0.00150819	0.456	1.98337	0.982969	-3.93757	16	38	11	CDS		0	0
hsa-miR-4285	NM_001346897	EGFR	GCGGCGAGTCCGACTCAT#GTGCGAAGGGCCTTGCCGCA#(((((((((((..(.(((#))).)..)))).))))))).	1109	1129	1	-21.6	1	3.45e-05	0.485	3.3049	3.34657	-9.30896	15	20	7	CDS		0	0
hsa-miR-4283	NM_001346897	EGFR	TGGGGCTCAGCGAGTTT#GAATTCAAAAAGATCAAAGTGCTGGGCTCCGG#((((((((((((.....#.)))))))))))).	2256	2288	0.923077	-20.8	1	0.000253813	0.5	5.98176	5.39053	-7.05204	12	14	12	CDS		0	0
hsa-miR-4284	NM_001346897	EGFR	GGGCTCACATCACCCCAT#GGGCTGCTGGGGCCCG#((((((.((.((.(((..#))).)).)))))))).	1664	1680	0.923077	-20.8	0	7.12e-09	0.294	7.39159	2.02147	-8.0129	13	16	8	CDS		0	0
hsa-miR-4286	NM_001346897	EGFR	ACCCCACTCCTGGTACC#ACTGGGATGGTGGGGG#.(((((((((((((...#)))))))..)))))).	2067	2083	0.846154	-20.4	1	1.75e-06	0.324	4.01255	1.8725	-4.76182	13	16	7	CDS		0	0
hsa-miR-4289	NM_001346897	EGFR	GCATTGTGCAGGGCTATCA#TGGTGGCCCTGGGGATCGGCCTCTTCATGCG#(((((.(.(((((((((((#))))))))))).).)...........)))).	2101	2132	0.846154	-22.1	0	0.000343468	0.324	2.23529	3.00205	-8.15217	17	31	11	CDS		0	0
hsa-miR-4289	NM_001346897	EGFR	GCATTGTGCAGGGCTATCA#GGTGCGTTCGGCACGGTGTA#(((((((((.((((((((.#)))).)))).))))))))).	2286	2306	0.833333	-19.6	1	0.00217506	0.426	5.81527	5.65787	-5.18008	17	20	9	CDS		0	0
hsa-miR-4290	NM_001346897	EGFR	TGCCCTCCTTTCTTCCCTC#GGGGTGCAGGAGAGGAGA#....(((((((((((((((#)))).).)))))))))).	724	742	0.923077	-19.3	0	0.00128743	0.456	3.26446	3.19794	-9.54656	15	18	10	CDS		0	0
hsa-miR-4291	NM_001346897	EGFR	TTCAGCAGGAACAGCT#GGCTGGCCAAACTGCTGGGT#((((((((...(((((#)))))......)))))))).	2695	2715	0.846154	-16.8	1	3.06e-05	0.5	3.32451	5.784	-9.06125	13	20	8	CDS		0	0
hsa-miR-500b-3p	NM_001346897	EGFR	GCACCCAGGCAAGGATTCTG#CAGATTTTGGGCTGGCCAAACTGCTGGGTGCG#((((((((((..(((.((((#)))).)))..))...........)))))))).	2686	2718	0.923077	-22	1	0.000453417	0.5	4.36757	5.59353	-10.3422	17	32	8	CDS		0	0
hsa-miR-4328	NM_001346897	EGFR	CCAGTTTTCCCAGGATT#GTCCCAATGGGAGCTGCTGGG#(((((.((((((((((.#))))...))))))..))))).	706	727	0.846154	-18.9	0	0.000265009	0.456	3.2869	3.07905	-5.83853	15	21	6	CDS		0	1
hsa-miR-4328	NM_001346897	EGFR	CCAGTTTTCCCAGGATT#GGTCCTTGGGAATTTGGA#((((..(((((((((((#)))))).))))).)))).	440	458	1	-17.4	0	0.000369866	0.603	4.35341	2.78411	-9.95757	15	18	6	CDS		0	1
hsa-miR-3610	NM_001346897	EGFR	GAATCGGAAAGGAGGCGCCG#CGGTGCGTTCGGCACGGTG#..((((....(((.((((((#)))))).)))....)))).	2285	2304	0.846154	-18.7	0	0.000201854	0.441	6.01364	5.50663	-11.9701	13	19	6	CDS		0	0
hsa-miR-3612	NM_001346897	EGFR	AGGAGGCATCTTGAGAAATGGA#TCATTTTCTCAGCCTCCA#.((((((....(((((((..((#))..))))))))))))).	398	416	0.923077	-20.5	1	0.00167096	0.529	1.77516	3.29584	-11.2306	15	18	13	CDS		0	0
hsa-miR-3612	NM_001346897	EGFR	AGGAGGCATCTTGAGAAATGGA#TCATGCCCTTCGGCTGCCTCCTG#((((((((.((.(((..((((.#))))...))).)).)))))))).	2500	2523	0.974359	-20	1	1.21e-05	0.456	4.69127	4.70454	-8.57382	17	23	8	CDS		0	0
hsa-miR-3612	NM_001346897	EGFR	AGGAGGCATCTTGAGAAATGGA#TCCATCCTGGAGAAAGGAGAACGCCTCCC#.((((((.((((.((..(((((#))))).)).)))).........)))))).	2898	2927	0.846154	-19.2	1	0.000172909	0.456	3.69838	5.45878	-7.62914	17	29	6	CDS		0	0
hsa-miR-3614-3p	NM_001346897	EGFR	TAGCCTTCAGATCTTGGTGTTTT#GCACCTACGGATGCACTGGGCCAGGTCTTGAAGGCTGT#((((((((((..((((((.(...#.).))))))..)))))))))).	1996	2034	1	-23.8	1	0.000406829	0.426	2.41046	2.28379	-10.1092	17	22	10	CDS		0	0
hsa-miR-3614-3p	NM_001346897	EGFR	TAGCCTTCAGATCTTGGTGTTTT#CACTGGGATGGTGGGGGCC#..(((((((.(((((((((....#)))))))))..))))))).	2066	2085	0.846154	-20	1	4.26e-06	0.324	3.31232	1.9629	-6.19951	16	19	9	CDS		0	0
hsa-miR-3615	NM_001346897	EGFR	TCTCTCGGCTCCTCGCGGCTC#GAGCCTGTGGGGCCGACAGCTATGAGAT#((((((((((((.((.(((((#))))))).)))))))).......)))).	1051	1079	0.846154	-27.2	1	0.000667354	0.382	2.24998	4.58592	-5.45975	19	28	8	CDS		0	0
hsa-miR-3615	NM_001346897	EGFR	TCTCTCGGCTCCTCGCGGCTC#GGGCTGCTGGGGCCCGGAGC#.((((.((((((..(((((((#))))))).)))))).)))).	1664	1684	0.846154	-27.3	0	9.23e-09	0.309	5.86344	1.83812	-7.84025	17	20	7	CDS		0	0
hsa-miR-3616-5p	NM_001346897	EGFR	ATGAAGTGCACTCATGATATGT#TCTGAGTGCATA#.....(((((((((.((.....#))))))))))).	1782	1794	1	-15	0	3.51e-05	0.412	2.48284	3.13937	-14.401	11	12	11	CDS		0	1
hsa-miR-3616-3p	NM_001346897	EGFR	CGAGGGCATTTCATGATGCAGGC#CCTGCGTGAAGAAGTGTCCCCGT#((.(((((((((.(.(((((((.#))))))).).))))))))).)).	994	1017	0.846154	-26.9	0	0.00642297	0.471	3.67267	4.61404	-7.51969	19	23	9	CDS		0	0
hsa-miR-3616-3p	NM_001346897	EGFR	CGAGGGCATTTCATGATGCAGGC#GCCCCCACTGCGTCAAGACCTGCCCG#...(((((..((.((((((((..#.)))))))).))..))))).	1888	1914	0.846154	-24.7	0	0.000158657	0.412	2.57851	3.01784	-10.1026	15	20	8	CDS		0	0
hsa-miR-3617-3p	NM_001346897	EGFR	CATCAGCACCCTATGTCCTTTCT#GAATGGGCCTAAGATCCCGTCCATCGCCACTGGGATGGTGGGGGCCCTCCTCTTGCTGCTGGTGG#((((((((((((((.((((....#.))))..)))))).............)))))))).	2039	2104	0.923077	-22.5	1	0.000157773	0.324	2.50277	2.5812	-4.67302	18	35	8	CDS		0	0
hsa-miR-23c	NM_001346897	EGFR	ATCACATTGCCAGTGATTACCC#GGTGGTCCTTGGGAATTTGG#..((.(((.((((.(((((((.#))))))).)))).))).)).	437	457	0.923077	-17.4	0	0.000192948	0.603	4.39146	2.82988	-10.9893	16	20	7	CDS		0	0
hsa-miR-23c	NM_001346897	EGFR	ATCACATTGCCAGTGATTACCC#GGAGGTGGCTGGTTATGTC#...((((.((((((.(((.((.#)).))).)))))).)))).	509	528	0.871795	-17.1	0	0.000359144	0.5	3.57496	3.0486	-9.56362	15	19	6	CDS		0	0
hsa-miR-3620-3p	NM_001346897	EGFR	TCACCCTGCATCCCGCACCCAG#TGGGAGCTGCTGGGGTGCAGGA#....(((((((((((((((((.#))))...))).)))))))))).	713	735	0.923077	-29.3	0	1.21e-05	0.456	4.08732	3.72571	-9.54656	17	22	10	CDS		0	0
hsa-miR-3620-3p	NM_001346897	EGFR	TCACCCTGCATCCCGCACCCAG#GGGAATGCGTGGACAAGTGCAACCTTCTGGAGGGTGAG#(((((((.((((((((((((..#)))..)))).)))..............)).))))))).	1723	1761	0.846154	-26.9	1	8.13e-05	0.456	3.18473	2.94734	-6.25121	19	38	7	CDS		0	0
hsa-miR-3620-3p	NM_001346897	EGFR	TCACCCTGCATCCCGCACCCAG#CTGGGTGCGGAAGAGAAAGAATACCATGCAGAAGGA#...((((((((.((((((((((#))))))))))...............))))))..)).	2709	2745	0.923077	-25.8	0	0.000213628	0.5	2.69698	5.90187	-9.86134	18	36	10	CDS		0	0
hsa-miR-3621	NM_001346897	EGFR	CGCGGGTCGGGGTCTGCAGG#GCAGACGCCGGCCATGTGT#((((((((((.((((((...#)))))).)))))).)))).	1956	1975	0.923077	-29.2	1	7.04e-05	0.397	0.573198	3.44815	-6.76235	16	19	6	CDS		0	0
hsa-miR-3622a-5p	NM_001346897	EGFR	CAGGCACGGGAGCTCAGGTGAG#CTTGACTGAGGACAGCATAGACGACACCTTCCTCCCAGTGCCTGG#((((((((((((...(((((..#.)))))..))))).))))))).	3353	3398	0.923077	-29.6	1	0.000530893	0.441	2.25249	2.5466	-6.81899	17	22	7	CDS		0	0
hsa-miR-3622a-5p	NM_001346897	EGFR	CAGGCACGGGAGCTCAGGTGAG#CTCCCCTCCTGAGCTCTCTGAGTGCA#...(((((((((((((((.(((#)))....)))))))))))...)))).	3220	3246	1	-26	0	8.38e-05	0.426	3.22308	2.98883	-6.51454	18	26	11	CDS		0	0
hsa-miR-3622a-3p	NM_001346897	EGFR	TCACCTGACCTCCCATGCCTGT#AGGCAGGGAATGCGTGGACAAGTGCAACCTTCTGGAGGGTGAG#((((((..((((((.(((((..#)))))))))........................)).)))))).	1718	1761	0.897436	-22.5	0	8.13e-05	0.456	3.11277	2.95669	-8.53035	17	43	9	CDS		0	0
hsa-miR-3622a-3p	NM_001346897	EGFR	TCACCTGACCTCCCATGCCTGT#GCAGGAGTCATGGGAGAAAACAACACCCTGGTCTGGA#...((.((((((((((((((((#)))))...)))))))..............)))).)).	1914	1951	1	-22.6	0	0.00013013	0.397	2.64604	3.03181	-8.4155	18	37	7	CDS		0	0
hsa-miR-3622b-5p	NM_001346897	EGFR	AGGCATGGGAGGTCAGGTGA#CGCCTTGACTGAGGACAGCATAGACGACACCTTCCTCCCAGTGCCTG#((((((((((((..(((((.#.))))).))))))).))))).	3350	3397	1	-29.4	1	0.000647236	0.426	1.80318	2.70543	-6.08354	17	21	7	CDS	MIRT733556	0	0
hsa-miR-3622b-5p	NM_001346897	EGFR	AGGCATGGGAGGTCAGGTGA#GCTTGGCCTGAAAACAGGACGGACCTCCATGCCTT#((((((((((((((((((..#)))))))))................))))))))).	1350	1385	0.923077	-24.9	1	0.00670541	0.471	3.09492	4.1254	-3.93757	18	35	9	CDS	MIRT733556	0	0
hsa-miR-3622b-3p	NM_001346897	EGFR	TCACCTGAGCTCCCGTGCCTG#CAGGAGAGGGAGCTTGTGGA#((((..((((((((...((((#))))...)))))))))))).	2175	2195	0.846154	-23.9	0	1.74e-05	0.368	5.79047	4.08957	-10.9261	16	20	12	CDS		0	0
hsa-miR-3622b-3p	NM_001346897	EGFR	TCACCTGAGCTCCCGTGCCTG#GGGCCAAAAGTGTGATCCAAGCTGTCCCAATGGGAGCTGCTGGGGTGC#.(((((((((((((((((((.#)))).........................))))))))).)..))))).	683	731	0.846154	-23.4	1	5.55e-06	0.426	3.33676	3.09913	-3.79332	19	48	9	CDS		0	0
hsa-miR-3646	NM_001346897	EGFR	AAAATGAAATGAGCCCAGCCCA#TGGGCTGGCCAAACTGCTGGGTGCGG#....((...(.(((((((((((#)))))))).......))).)...)).	2693	2719	0.923077	-17.2	0	0.000210602	0.485	4.89662	5.55727	-17.285	14	26	8	CDS		0	0
hsa-miR-3648	NM_001346897	EGFR	AGCCGCGGGGATCGCCGAGGG#CCTCCATCAGTGGCGATCTCCACATCCTGCCGGTGGCA#.(((((((((((((((((((.#)))).......))))))))))...........))))).	1213	1251	0.923077	-29.4	1	7.61e-05	0.441	2.83845	2.99974	-3.79332	19	38	10	CDS		0	0
hsa-miR-3650	NM_001346897	EGFR	AGGTGTGTCTGTAGAGTCC#GGACGACAGGCCACCTC#(((((.((((((...((((#)))).))))))))))).	128	145	0.846154	-20	0	2.39e-05	0.176	-0.308116	-0.188686	-8.71995	15	17	11	5UTR		0	0
hsa-miR-3650	NM_001346897	EGFR	AGGTGTGTCTGTAGAGTCC#GGACAGCATAGACGACACCTT#((((((((((((...((((#))))...)))))).)))))).	3362	3383	0.923077	-20	1	0.0457048	0.412	1.46424	1.84467	-6.81899	16	21	6	CDS		0	0
hsa-miR-3650	NM_001346897	EGFR	AGGTGTGTCTGTAGAGTCC#ACCTACGGATGCACTG#.(((((((((((((.((..#))))))))))))))).	1998	2014	0.846154	-18.7	1	0.000188747	0.426	2.15426	2.30494	-4.52877	15	16	15	CDS		0	0
hsa-miR-3651	NM_001346897	EGFR	CATAGCCCGGTCGCTGGTACATGA#CGTGATGGCCAGCGTGGACAACCCCCACGTGTGCCGCCTGCTGGGCA#....(((((((.(.(((((((((.#.))))))))).).))))))).	2417	2464	0.846154	-27.4	0	2.41e-06	0.324	6.7506	5.4087	-13.7502	17	21	9	CDS		0	0
hsa-miR-3652	NM_001346897	EGFR	CGGCTGGAGGTGTGAGGA#TCCTCCATCCTGGAGAAAGGAGAACGCCTCCCTCAGCCA#.(((((((((((((((((#)))))..................))))))))...)))).	2895	2934	0.807692	-23.4	1	0.0281052	0.485	4.44752	6.14031	-3.79332	17	39	8	CDS		0	0
hsa-miR-3652	NM_001346897	EGFR	CGGCTGGAGGTGTGAGGA#CCTCCAGCATCTCCAGAGGG#(..((((((((((((((.#))))..))))))))))..).	3486	3506	0.923077	-22.6	0	2.65e-06	0.426	-0.995103	-0.548573	-6.65879	15	20	10	CDS		0	0
hsa-miR-3652	NM_001346897	EGFR	CGGCTGGAGGTGTGAGGA#CTCATGCCCTTCGGCTGC#((((((((((((((((..#)))))))).)))))))).	2499	2517	0.846154	-22.6	1	0.000145997	0.412	4.85315	4.91507	-3.93757	16	18	8	CDS		0	0
hsa-miR-3654	NM_001346897	EGFR	GACTGGACAAGCTGAGGAA#TTCCTCCCAGTGCCTGGTGAGTGGCTTGTCTGGAAACAGTCC#(((((((((((((((((((#))))))................))))))))......))))).	3381	3423	0.846154	-21	1	0.000108277	0.397	1.70917	1.03257	-3.93757	19	42	8	CDS		0	0
hsa-miR-3654	NM_001346897	EGFR	GACTGGACAAGCTGAGGAA#TTTCTCAGCCTCCAGA#..(((((...(((((((((#))))))))).))))).	402	418	0.846154	-19.2	0	0.00138784	0.559	2.32534	3.32503	-9.56953	14	16	9	CDS		0	0
hsa-miR-3655	NM_001346897	EGFR	GCTTGTCGCTGCGGTGTTGCT#AGCAGTGCTCCGGGCGCTGCCGTGGCAAGTC#(((((((((.(((((((((((#)))).........))))))).))))))))).	775	806	0.923077	-25.1	1	6.72e-07	0.324	3.92461	3.97227	-5.18008	20	31	9	CDS		0	0
hsa-miR-3655	NM_001346897	EGFR	GCTTGTCGCTGCGGTGTTGCT#AACACCGCAGCATGTCAAGA#.((((.((((((((((((...#)))))))))))..).)))).	2663	2683	0.923077	-24.4	0	0.000706259	0.485	4.4155	4.92293	-5.69428	16	20	11	CDS		0	0
hsa-miR-3659	NM_001346897	EGFR	TGAGTGTTGTCTACGAGGGCA#GCCAGCGTGGACAACCCCCAC#((.(.((((((((((..(((.#)))..)))))))))).).)).	2424	2445	0.846154	-23.7	0	9.59e-06	0.353	5.55995	5.42634	-9.8472	16	21	10	CDS		0	0
hsa-miR-3659	NM_001346897	EGFR	TGAGTGTTGTCTACGAGGGCA#GCGCCTTGACTGAGGACAGCATAGACGACACC#...(((((((((((((((((.#)).))))).............)))))))))).	3349	3381	0.846154	-21.1	0	0.100898	0.397	1.58324	1.93305	-6.51454	17	32	10	CDS		0	0
hsa-miR-3661	NM_001346897	EGFR	TGACCTGGGACTCGGACAGCTG#AGCTGTCCCAATGGGAGCTGCTGGGGTGCAG#((((((.((.(((((((((((.#))))))))......)))...)).)))).)).	702	733	1	-22.9	0	6.85e-06	0.441	2.38301	2.98526	-6.72377	19	31	8	CDS		0	1
hsa-miR-3662	NM_001346897	EGFR	GAAAATGATGAGTAGTGACTGATG#CAGCGCTACCTTGTCATTC#...((((((((((((((.(((...#))))))))).)))))))).	3051	3070	0.961538	-17.7	0	0.134726	0.471	5.20562	4.30518	-6.51454	17	19	9	CDS		0	0
hsa-miR-3663-3p	NM_001346897	EGFR	TGAGCACCACACAGGCCGGGCGC#GCGTCCGAGCCTGTGGGGCCGA#((.((.((.((((((((((((((#))))))).))))))))))))).	1045	1067	0.923077	-33	0	2.99e-06	0.353	4.51173	4.56767	-8.45246	20	22	13	CDS		0	0
hsa-miR-3663-3p	NM_001346897	EGFR	TGAGCACCACACAGGCCGGGCGC#CGCAGACGCCGGCCATGTGTGCCACCTGTGCCAT#((.((((((((((((((.((((.#.)))))))).))))))......)))))).	1955	1989	0.923077	-28.7	0	6.02e-05	0.382	2.32945	3.24763	-5.49511	20	29	8	CDS		0	0
hsa-miR-3663-3p	NM_001346897	EGFR	TGAGCACCACACAGGCCGGGCGC#TGCCCGGCGAGTCGGGCTCT#.((((.((..((..((((((((.#))))))))..)).)))))).	315	335	0.846154	-27.8	0	5.92e-06	0.353	-0.58258	1.289	-10.1392	16	20	8	CDS		0	0
hsa-miR-3664-5p	NM_001346897	EGFR	AACTCTGTCTTCACTCATGAGT#GAGGAAGACGGCGTC#.((.((((((((.(((......#))))))))))).)).	1080	1095	1	-17.5	0	0.00133447	0.412	4.05389	4.00326	-8.11448	13	15	11	CDS		0	0
hsa-miR-3666	NM_001346897	EGFR	CAGTGCAAGTGTAGATGCCGA#CGGCCATGTGTGCCACCTGTGCCATCCAAACTGCACCTACGGATGCACTGG#(((((((..(((((.(((...#.))).)))))..))))))).	1964	2015	0.846154	-21.5	1	0.000270634	0.426	3.95811	3.41571	-8.04305	15	20	7	CDS		0	0
hsa-miR-3667-5p	NM_001346897	EGFR	AAAGACCCATTGAGGAGAAGGT#ACCTTCCTCCCAGTGCCTGGTG#....((((((((.(((((((((#)))))).))))))))...))).	3378	3400	0.846154	-19	0	1.96e-05	0.426	2.09957	1.56287	-10.8357	17	22	8	CDS		0	0
hsa-miR-3667-5p	NM_001346897	EGFR	AAAGACCCATTGAGGAGAAGGT#ACCTTGTCATTCAGGGGGATG#..(..(((.(((((((.(((((#))))).)).))))))))..).	3058	3079	0.846154	-17.6	0	4.99e-06	0.456	6.54363	4.22682	-13.1644	16	21	8	CDS		0	0
hsa-miR-3667-3p	NM_001346897	EGFR	ACCTTCCTCTCCATGGGTCTTT#GAGCCTGTGGGGCCGACAGCTATGAGATGGAGGAAGA#..(((((((((((((((.(((.#))))))))))..................)))))))).	1051	1088	0.923077	-21.2	1	0.0724849	0.397	3.47368	4.69419	-4.957	18	37	10	CDS		0	0
hsa-miR-3667-3p	NM_001346897	EGFR	ACCTTCCTCTCCATGGGTCTTT#GGCCCTGGGGATCGGCCTCTTCATGCGAAGGC#.((((((((((((.(((((...#))))))))))).............).))))).	2105	2137	0.923077	-21	1	3.82e-05	0.324	2.51676	3.22703	-4.65016	17	32	11	CDS		0	0
hsa-miR-3670	NM_001346897	EGFR	AGAGCTCACAGCTGTCCTTCTCTA#GGAGAGGGAGCTTGTGGAGCCTCTT#((((((((((((..(((((((((.#)))))))))))).))).))).))).	2177	2202	0.846154	-24.8	1	2.73e-07	0.382	5.31649	4.15971	-6.08354	21	25	12	CDS		0	0
hsa-miR-3674	NM_001346897	EGFR	ATTGTAGAACCTAAGATTGGCC#GGCCAAACTGCTGGGTG#........(((((((.((((((#)))))).))..))))).	2699	2716	0.846154	-15.2	0	0.000754711	0.515	3.42976	5.68199	-19.6569	13	17	6	CDS		0	1
hsa-miR-3675-5p	NM_001346897	EGFR	TATGGGGCTTCTGTAGAGATTTC#TTCTTCAGCAGCCCCT#...((((((.(((.((((.....#)))).))).)))))).	3192	3208	0.846154	-19.7	0	0.0154564	0.382	4.71827	3.70413	-8.61389	13	16	6	CDS		0	0
hsa-miR-3675-5p	NM_001346897	EGFR	TATGGGGCTTCTGTAGAGATTTC#CGCTGCGGAGGCTGCT#...(.(((((((((((.(.....#).))))))))))).).	2158	2174	0.846154	-19.4	0	6.91e-07	0.353	2.36172	3.86969	-10.6336	13	16	11	CDS		0	0
hsa-miR-3675-3p	NM_001346897	EGFR	CATCTCTAAGGAACTCCCCCAA#TGGACAAGTGCAACCTTCTGGAGGGTGAGCCAAGGGAGTTTGTGGAGAA#..((((((..((((((((....#.)))))))).)))))).	1732	1781	1	-20.1	1	0.00594951	0.456	1.78057	2.74486	-7.2559	14	17	8	CDS		0	0
hsa-miR-3677-5p	NM_001346897	EGFR	CAGTGGCCAGAGCCCTGCAGTG#GCTGCTGGTGGTGGCCCTGG#(((.(((((..(((..(((((.#))))).)))..)))))))).	2093	2113	0.923077	-26.6	0	1.03e-05	0.309	0.928065	2.64756	-12.0054	16	20	8	CDS		0	0
hsa-miR-3677-3p	NM_001346897	EGFR	CTCGTGGGCTCTGGCCACGGCC#GCCCGACGCGGCCGAGGCGGCCGGAGTCCCGAGC#((((.(((((((((((.(((((#.)))))....))))))))))))))).	65	99	0.923077	-36.9	0	7.39e-07	0.162	-0.273049	-0.129713	-8.05661	20	26	15	5UTR		0	0
hsa-miR-3677-3p	NM_001346897	EGFR	CTCGTGGGCTCTGGCCACGGCC#GGCTGCTGGGGCCCGGAGCCCAGGGA#.((.((((((((((((((((((#))))).)))...)))))))))).)).	1665	1691	0.876923	-33.5	0	4.56e-06	0.279	4.69495	2.08673	-6.82535	20	26	10	CDS		0	0
hsa-miR-3678-3p	NM_001346897	EGFR	CTGCAGAGTTTGTACGGACCGG#CCGGCGAGTCGGGCTCTGGAGG#((.(((((((((.((...((((#))))...))))))))))).)).	318	340	0.923077	-23.1	0	4.87e-05	0.397	-0.387241	1.28274	-7.01729	17	22	11	CDS		0	0
hsa-miR-3678-3p	NM_001346897	EGFR	CTGCAGAGTTTGTACGGACCGG#CTGGTGTGTGCAGATCGCAA#.(((...(((((((((.(((((#))))).))))))))).))).	2573	2593	0.846154	-21.1	0	0.000888408	0.426	6.1759	4.85468	-11.357	17	20	9	CDS		0	0
hsa-miR-3679-3p	NM_001346897	EGFR	CTTCCCCCCAGTAATCTTCATC#AAGATCACAGATTTTGGGCTGGCCAAACTGCTGGGTGCGGAAGA#(((((((((((((.........#.))))))).).))))).	2679	2723	0.961538	-19.5	1	0.000286449	0.485	6.03985	4.97029	-5.76291	13	17	7	CDS		0	0
hsa-miR-3680-5p	NM_001346897	EGFR	GACTCACTCACAGGATTGTGCA#CACATCTGTGTGTGTGAGTG#.((((((.((((.(..((((..#))))..).)))).)))))).	3668	3688	0.846154	-19.6	1	0.00660876	0.574	-0.224527	-0.404891	-8.36459	15	20	6	3UTR		0	0
hsa-miR-3681-3p	NM_001346897	EGFR	ACACAGTGCTTCATCCACTACT#AGTGCCTATCAAGTGGATGGCATTGG#...((((((..((((((((...#.)))))))))))))).	2750	2776	1	-20.1	0	0.000310413	0.574	6.32054	5.00238	-10.5818	14	16	14	CDS		0	0
hsa-miR-3682-3p	NM_001346897	EGFR	TGATGATACAGGTGGAGGTAG#GCCATGTGTGCCACCTGTGCCATCC#.((((.(((((((((......#.))))))))).)))).	1966	1991	0.820513	-20.7	0	0.00039975	0.368	1.11469	3.46926	-5.92733	13	16	9	CDS		0	0
hsa-miR-3684	NM_001346897	EGFR	TTAGACCTAGTACACGTCCTT#AGGAGGTGGCTGGTTA#...((((.(((.(((.((((.#)))).)))))))))).	508	524	0.846154	-16.9	0	3.66e-06	0.5	4.65045	3.40028	-12.408	14	16	10	CDS		0	0
hsa-miR-3686	NM_001346897	EGFR	ATCTGTAAGAGAAAGTAAATGA#TCAGTTTTCTCTTGCAGT#..(((((((((((((.......#.))))))))))))).	1427	1445	0.846154	-16.7	1	0.0214964	0.5	2.29979	3.64791	-5.19005	13	15	13	CDS		0	1
hsa-miR-3689a-5p	NM_001346897	EGFR	TGTGATATCATGGTTCCTGGGA#CCCAGAGTGCCTGCCTCAGGCCATGAACATCACC#.(((((.((((((..((((((.#.))))))))))))..))))).	1802	1836	1	-21.6	0	0.00142846	0.412	4.00227	2.96654	-6.9293	17	21	12	CDS		0	0
hsa-miR-3689a-5p	NM_001346897	EGFR	TGTGATATCATGGTTCCTGGGA#TCCACAGGAACTGGATATTC#...((((((..(((((((((((#))).)))))))).)))))).	1289	1309	1	-21	0	0.00211386	0.559	3.30311	3.47366	-10.5818	17	20	8	CDS		0	0
hsa-miR-3689a-3p	NM_001346897	EGFR	CTGGGAGGTGTGATATCGTGGT#GCCACGTGCAAGGACACCTGCCCC#..(((((((((.....((((((#)))))).......)))))).))).	897	921	0.846154	-22.8	1	0.00240813	0.426	4.31624	4.10813	-11.4183	15	24	6	CDS		0	0
hsa-miR-3689a-3p	NM_001346897	EGFR	CTGGGAGGTGTGATATCGTGGT#GCTACGAATATTAAACACTTCAAAAACTGCACCTCCATCAGT#((((((((((((((((((((((#))))))).))))................))))))))..))).	1182	1224	0.923077	-22.5	1	0.00764154	0.529	3.88022	2.8457	-3.93757	22	42	8	CDS		0	0
hsa-miR-3690	NM_001346897	EGFR	ACCTGGACCCAGCGTAGACAAAG#CTGCACCTACGGATGCACTGGGCCAGGTC#((((((.(((((.(((..(....#.)..))).))))))))))).	1994	2023	0.846154	-25.4	0	2.78e-05	0.426	1.94767	2.14272	-6.77039	15	20	11	CDS		0	0
hsa-miR-3691-5p	NM_001346897	EGFR	AGTGGATGATGGAGACTCGGTAC#GTGGCGATCTCCACATCCT#...(((((.((((((.(((.(((#))).)))))))))))))).	1222	1241	1	-23.4	0	0.000961045	0.456	2.50316	3.03641	-7.80398	17	19	14	CDS		0	0
hsa-miR-3691-5p	NM_001346897	EGFR	AGTGGATGATGGAGACTCGGTAC#AGCGAGATCTCCTCCATCCT#...(((((..(((((((((.(..#).)))).)))))..))))).	2886	2906	0.846154	-22.8	0	0.000342525	0.426	5.67295	5.42558	-8.81344	15	20	5	CDS		0	0
hsa-miR-3692-5p	NM_001346897	EGFR	CCTGCTGGTCAGGAGTGGATACTG#CGGCCCCCACTGCGTCAAGACCTGCCCGGCAGGA#((((((((.(((((((((...(((#)))...))))).........)))).)))))))).	1886	1920	1	-27.6	1	1.61e-05	0.397	3.16303	3.25496	-4.99396	20	34	8	CDS		0	0
hsa-miR-3692-5p	NM_001346897	EGFR	CCTGCTGGTCAGGAGTGGATACTG#CAGTGGCGATCTCCACATCCTGCCGGTGGC#.(((((((.(((((((((((((((#)))))......))))).)))))))))))).	1220	1250	1	-27.5	1	7.2e-05	0.441	3.22818	3.02963	-4.84971	22	30	12	CDS		0	0
hsa-miR-3692-5p	NM_001346897	EGFR	CCTGCTGGTCAGGAGTGGATACTG#CAGTGTCCAAGCCAGGTGCTCCCTCCAGCAT#..((((((...(((((((((((((#)))))))).........)))))..)))))).	3465	3496	0.826923	-26.4	1	1.82e-05	0.412	-1.07894	-0.704189	-10.0807	19	31	8	CDS		0	0
hsa-miR-3692-3p	NM_001346897	EGFR	GTTCCACACTGACACTGCAGAAGT#CTTCTGGAGGGTGAGCCAAGGGAGTTTGTGGAGA#.(((((((((.((.((.((((((.#)))))).)).)).))...........))))))).	1746	1780	0.923077	-21.6	1	0.0773237	0.441	2.97131	3.05773	-7.47494	19	34	7	CDS		0	0
hsa-miR-3713	NM_001346897	EGFR	GGTATCCGTTTGGGGATGGT#ACCGTGCCCTGATGGATGA#..((((((((.(((.(((((#))))).))).)))))))).	3118	3137	0.923077	-22.8	1	0.00120616	0.456	4.52445	4.25423	-8.51722	16	19	8	CDS		0	0
hsa-miR-3714	NM_001346897	EGFR	GAAGGCAGCAGTGCTCCCCTGT#GCCGGGGCAGCGCTCCTGGCGCTGCTGGCTG#..((.((((((((((((((.((#)).))))..........)))))))))).)).	279	310	0.846154	-28.1	0	8.76e-07	0.206	-0.0410683	0.490998	-9.07604	18	31	10	CDS		0	0
hsa-miR-3180	NM_001346897	EGFR	TGGGGCGGAGCTTCCGGAG#CTCCGGGCGCTGCCGTGGCAAGTCCCCCAG#(((((((((((.(((((((#))))))).))).))).........))))).	782	812	0.846154	-27.2	1	2.63e-05	0.324	3.30149	4.34174	-7.28438	18	30	7	CDS		0	0
hsa-miR-3689b-5p	NM_001346897	EGFR	TGTGATATCATGGTTCCTGGGA#CCCAGAGTGCCTGCCTCAGGCCATGAACATCACC#.(((((.((((((..((((((.#.))))))))))))..))))).	1802	1836	1	-21.6	0	0.00142846	0.412	4.00227	2.96654	-6.9293	17	21	12	CDS		0	0
hsa-miR-3689b-5p	NM_001346897	EGFR	TGTGATATCATGGTTCCTGGGA#TCCACAGGAACTGGATATTC#...((((((..(((((((((((#))).)))))))).)))))).	1289	1309	1	-21	0	0.00211386	0.559	3.30311	3.47366	-10.5818	17	20	8	CDS		0	0
hsa-miR-3689b-3p	NM_001346897	EGFR	CTGGGAGGTGTGATATTGTGGT#CCACTGCGTCAAGACCTGCCCGGC#(((((((((.((((...((((.#))))...))))..)))).))))).	1892	1916	0.846154	-22	1	6.41e-05	0.397	3.50936	3.36685	-6.14858	17	24	5	CDS		0	0
hsa-miR-3909	NM_001346897	EGFR	TGTCCTCTAGGGCCTGCAGTCT#GGCGAGTCGGGCTCTGGAGGAA#..(((((((((((((((.(((.#)))..).)))))))))))))).	320	342	1	-29.1	1	9.48e-05	0.412	0.296449	1.32671	-4.957	18	22	14	CDS		0	0
hsa-miR-3909	NM_001346897	EGFR	TGTCCTCTAGGGCCTGCAGTCT#AGGCTGCACAGGCCCCCGGGAGAGCGACT#.(((((((.(((((((((((((#))))))))..))))).....)))).))).	839	868	0.846154	-28	1	0.00144417	0.353	4.64638	3.94083	-4.84971	20	29	8	CDS		0	0
hsa-miR-3911	NM_001346897	EGFR	TGTGTGGATCCTGGAGGAGGCA#TGGCATTTAGGGGTGACTCCTTCACACATACTCCTCCTCTGGATCCACAGGA#(.(((((((((.((((((((..#.))))))))))))))))).).	1246	1298	0.923077	-31.6	1	0.00022501	0.559	4.22358	3.09187	-8.44805	18	21	17	CDS		0	0
hsa-miR-3915	NM_001346897	EGFR	TTGAGGAAAAGATGGTCTTATT#AAGACCATCCAGGAGGTGGCTGGTTATGTCCTCAT#.((((((...(((((((((...#)))))))))...................)))))).	498	533	0.846154	-18.9	1	0.00209653	0.5	4.1827	3.38905	-8.40586	15	35	9	CDS		0	0
hsa-miR-3916	NM_001346897	EGFR	AAGAGGAAGAAATGGCTGGTTCTCAG#CTGGGGATCGGCCTCTTCA#.....(((((...(((((((((((((#)))))))))))))))))).	2109	2128	0.846154	-25.1	0	0.00034499	0.353	1.73535	3.05067	-21.1263	18	19	18	CDS		0	0
hsa-miR-3916	NM_001346897	EGFR	AAGAGGAAGAAATGGCTGGTTCTCAG#CTGAGGACAGCATAGACGACACCTTCCTCC#..(((((((.....(((.((((((((#)))))))))))...........))))))).	3358	3388	0.846154	-22.4	1	0.0227902	0.426	2.51458	2.88988	-14.5171	18	30	11	CDS		0	0
hsa-miR-3917	NM_001346897	EGFR	GCTCGGACTGAGCAGGTGGG#TCACCTGCACAGGACGGGG#.((((..(((.((((((((.#)))))))).)))..)))).	1831	1850	0.846154	-26.2	0	5.31e-05	0.412	3.77524	3.15005	-10.0627	15	19	8	CDS		0	0
hsa-miR-3917	NM_001346897	EGFR	GCTCGGACTGAGCAGGTGGG#CCGCCTGCTGGGCATCTGCCTCACCTCCACCGTGCA#((.(((.((.(((((((((.#))))))))).)).................))).)).	2450	2486	0.923077	-25	0	0.00321747	0.338	4.26025	5.45004	-8.28131	16	36	9	CDS		0	0
hsa-miR-3918	NM_001346897	EGFR	ACAGGGCCGCAGATGGAGACT#CTCCTCTTGCTGCTGGTGGTGGCCCTGG#.((((((((((((.((((...#)))))))...........))))))))).	2085	2113	0.846154	-25.1	1	1.03e-05	0.309	1.98839	2.50852	-4.65016	16	28	9	CDS		0	0
hsa-miR-3918	NM_001346897	EGFR	ACAGGGCCGCAGATGGAGACT#CTCCATCAGTGGCGATCTCCACATCCTGC#.(((((((((.(((((((...#))))))).)))))...........)))).	1214	1243	0.923077	-23.7	1	0.000878176	0.456	2.92724	3.24958	-6.6181	16	29	7	CDS		0	0
hsa-miR-3150b-3p	NM_001346897	EGFR	TGAGGAGATCGTCGAGGTTGG#CCATATGACGGAATCCCTGCCAGCGAGATCTCCTCC#.(((((((((.(((.(((.((#.)).)))..)))))))))))).	2865	2901	0.807692	-24.2	1	0.00112281	0.441	5.12249	5.15496	-7.35355	17	22	12	CDS		0	0
hsa-miR-3150b-3p	NM_001346897	EGFR	TGAGGAGATCGTCGAGGTTGG#ACCTCCATCAGTGGCGATCTCCA#...(((((((((((((((...#))))).......)))))))))).	1212	1235	0.923077	-22.5	0	0.000632588	0.471	3.58493	2.68899	-6.51454	15	23	10	CDS		0	0
hsa-miR-3922-5p	NM_001346897	EGFR	TCAAGGCCAGAGGTCCCACAGCA#CTGGAAAAAACTGTTTGGGACCTCCGGTCA#....((((.(((((((((.((((#.))))))))))))).)))).	1553	1583	1	-27.2	0	2.46e-05	0.618	1.35363	2.09753	-10.603	17	20	13	CDS		0	0
hsa-miR-3922-3p	NM_001346897	EGFR	TCTGGCCTTGACTTGACTCTTT#TCATGGTCAAGTGCTGGAT#((((((((((((((((......#))).))))))).)))))).	2962	2981	0.942308	-18.3	1	0.000334826	0.529	7.4571	4.83558	-3.93757	16	19	7	CDS		0	0
hsa-miR-3925-5p	NM_001346897	EGFR	AAGAGAACTGAAAGTGGAGCCT#GGCAGGACCAAGCAACATGGTCAGTTTTCTC#.((((((((((..(((..((..#.))..)))..)))))))))).	1407	1438	0.903846	-19.5	1	0.00611078	0.5	4.46967	3.07141	-8.42926	15	21	10	CDS		0	0
hsa-miR-3925-3p	NM_001346897	EGFR	ACTCCAGTTTTAGTTCTCTTG#CAATGGGAGCTGCTGGGGTG#((((((((...((((((((((#))).))))))))))))))).	710	730	1	-20.2	1	7.91e-06	0.426	2.74562	3.29465	-9.06125	18	20	15	CDS		0	0
hsa-miR-3926	NM_001346897	EGFR	TGGCCAAAAAGCAGGCAGAGA#TGCCTGCCTCAGGCCAT#(((((.....(((((((....#)))))))....))))).	1809	1826	0.846154	-21.8	0	1.01e-05	0.382	3.36126	2.88836	-11.9948	12	17	7	CDS		0	0
hsa-miR-3927-5p	NM_001346897	EGFR	GCCTATCACATATCTGCCTGT#GCAGACACAGTGAAGGGCG#((((.((((...(((((....#)))))....)))).)))).	3524	3543	0.846154	-18.6	0	0.016364	0.471	-0.0259089	-0.931205	-15.4707	13	19	5	CDS		0	0
hsa-miR-676-5p	NM_001346897	EGFR	TCTTCAACCTCAGGACTTGCA#CAAGCTCTCTTGAGGATCTTGAAGGA#(((((((((((((((((((..#))))...))))))))...))))))).	2226	2252	0.884615	-19.2	1	0.000283775	0.574	4.80979	5.33297	-3.93757	19	26	8	CDS		0	0
hsa-miR-676-3p	NM_001346897	EGFR	CTGTCCTAAGGTTGTTGAGTT#AACATAACATCCTTGGGATT#..(((((((((.(((((.(((#))).))))).))))))))).	1455	1475	0.948718	-19.8	1	0.00160631	0.515	3.15814	3.31089	-8.3038	17	20	9	CDS		0	0
hsa-miR-3928-3p	NM_001346897	EGFR	GGAGGAACCTTGGAGCTTCGGC#CCGGAGCCCAGGGACTGCGTCTC#(((.(..((((((.(((((((.#)))))))))))))....).))).	1677	1700	0.846154	-24.3	0	2.56e-05	0.309	1.11962	2.33346	-11.2711	17	23	13	CDS		0	0
hsa-miR-3929	NM_001346897	EGFR	GAGGCTGATGTGAGTAGACCACT#GGTGGTGGCCCTGGGGATCGGCCTCT#(((((((((.(.((...((((((#))))))....)).)..))))))))).	2099	2125	0.923077	-24.5	1	1.3e-05	0.368	2.50993	2.98809	-9.49538	18	26	9	CDS		0	1
hsa-miR-3934-5p	NM_001346897	EGFR	TCAGGTGTGGAAACTGAGGCAG#CTGCCTCAGGCCATGAACATCACCTGC#.(((((((((...(((((((((#))))))))).))).......)))))).	1812	1839	1	-25.8	1	0.0511905	0.412	1.98428	2.72313	-11.254	18	27	9	CDS		0	0
hsa-miR-3934-3p	NM_001346897	EGFR	TGCTCAGGTTGCACAGCTGGGA#CCCACGTGTGCCGCCTGCTGGGCAT#(((((((((.(((((..((((.#))))..))))).)))))...)))).	2440	2465	0.923077	-27.5	1	3.26e-06	0.338	5.04493	5.40345	-5.41313	18	25	5	CDS		0	0
hsa-miR-3936	NM_001346897	EGFR	TAAGGGGTGTATGGCAGATGCA#GTCTGCCATGCCTTGTGCTCCC#...((((((((((((((((...#))))))))))).....))))).	1638	1660	0.923077	-23.4	0	0.000163854	0.265	2.40089	2.65731	-6.51454	16	22	11	CDS		0	0
hsa-miR-3938	NM_001346897	EGFR	AATTCCCTTGTAGATAACCCGG#GGGTGAGCCAAGGGAGTTT#((((((((((......((((..#))))....)))))))))).	1754	1773	1	-19.6	1	0.00564505	0.471	3.52151	3.02362	-13.2236	14	19	10	CDS		0	0
hsa-miR-3940-5p	NM_001346897	EGFR	GTGGGTTGGGGCGGGCTCTG#CAGAGTGCCTGCCTCAGGCCATG#((((.(((((((((((((((#))))..))))))))))).)))).	1804	1827	0.846154	-30.8	0	1.03e-05	0.397	3.45553	2.92972	-8.05661	19	23	11	CDS		0	0
hsa-miR-3940-3p	NM_001346897	EGFR	CAGCCCGGATCCCAGCCCACTT#TGGGCTGGCCAAACTGCTGGGTG#..((((((...((((((((...#))))))))........)))))).	2693	2716	1	-23.3	1	0.000754711	0.515	5.14494	5.14198	-10.0807	14	23	8	CDS		0	0
hsa-miR-3944-5p	NM_001346897	EGFR	TGTGCAGCAGGCCAACCGAGA#TCTGGTTGTTTGCTGTACC#.((((((((((.(((((.(((#)))))))))))))))))).	3592	3611	0.923077	-22.7	1	0.0268826	0.618	-0.668499	-0.544362	-7.14013	18	19	18	3UTR		0	0
hsa-miR-3945	NM_001346897	EGFR	AGGGCATAGGAGAGGGTTGATAT#TCGACCCACTCAGCAGCAGCCAGTCTCCAGTGTCCA#.((((((.((((((((((((...#)))))))................))))).)))))).	3438	3474	0.846154	-24.3	1	0.113374	0.382	-0.314392	0.0975101	-6.10696	18	36	7	CDS		0	0
hsa-miR-374c-3p	NM_001346897	EGFR	CACTTAGCAGGTTGTATTATAT#GTGCCGCCTGCTGGGC#..((((((((((.((((.....#)))).)))))))))).	2447	2463	0.846154	-19.4	1	1.73e-06	0.324	4.93663	5.40014	-6.24613	14	16	10	CDS		0	0
hsa-miR-642b-5p	NM_001346897	EGFR	GGTTCCCTCTCCAAATGTGTCT#GGAGAGGGAGCTT#((((((((((((..........#)))))))))))).	2177	2190	0.923077	-23.7	1	0.000313984	0.368	5.25911	4.00509	-7.05204	12	13	12	CDS		0	0
hsa-miR-550b-2-5p	NM_001346897	EGFR	ATGTGCCTGAGGGAGTAAGACA#CTGCCTCAGGCCATG#(((.((((((((.((.......#)).))))))))))).	1812	1827	0.923077	-21.6	0	1.03e-05	0.397	1.97241	2.96902	-8.49178	13	15	11	CDS		0	0
hsa-miR-550b-2-5p	NM_001346897	EGFR	ATGTGCCTGAGGGAGTAAGACA#CTCCCTCAGCCACC#..(((.(((((((((.......#))))))))).))).	2922	2936	0.846154	-20.9	0	0.042045	0.485	4.23703	5.67526	-7.09101	12	14	9	CDS		0	0
hsa-miR-550b-3p	NM_001346897	EGFR	TCTTACTCCCTCAGGCACTG#CAGTGCCTGGTGAGTGGC#..((((((.(.(((((((((#)))))))))).)))))).	3388	3406	1	-22.6	1	6.52e-07	0.426	2.38649	0.782795	-8.83816	16	18	10	CDS		0	0
hsa-miR-1268b	NM_001346897	EGFR	CGGGCGTGGTGGTGGGGGTG#GCCCCCACTGCGTCAAGACCTGCCCGG#((((((.((((((((((((.#)))))))))........))))))))).	1888	1915	0.884615	-31.4	0	0.00021364	0.412	3.56394	3.37776	-5.48126	18	27	9	CDS		0	0
hsa-miR-378e	NM_001346897	EGFR	ACTGGACTTGGAGTCAGGA#CCTGACTCCGTCCAGTA#(((((((..(((((((((.#)))))))))))))))).	204	221	0.846154	-28.6	1	0.0102711	0.338	0.0875096	-0.307745	-7.3076	16	17	16	5UTR		0	0
hsa-miR-4418	NM_001346897	EGFR	CACTGCAGGACTCAGCAG#CTGCTGGGGTGCAGG#..(((((...((((((((#)))))))).))))).	719	734	0.846154	-19.6	0	1.12e-05	0.456	5.38802	3.25424	-9.56953	13	15	8	CDS		0	0
hsa-miR-4420	NM_001346897	EGFR	GTCACTGATGTCTGTAGCTGAG#CTCCAGCATCTCCAGAGGGGGAAACAGTGGCAGATTTGCAGACACAGTGAA#.((((((.((((((((((((..#.)))..))))))))))))))).	3487	3538	1	-22.7	1	0.00320154	0.485	-1.07562	-0.561382	-6.10696	18	22	15	CDS		0	0
hsa-miR-4420	NM_001346897	EGFR	GTCACTGATGTCTGTAGCTGAG#CTCACTCTCCATAAATGCTACGAATATTAAACACTTCAAAAACTGCACCTCCATCAGTGGCG#((((((((((..(((((.....#.)))))....)))))))))).	1166	1228	1	-20.6	1	0.0017689	0.529	3.55386	3.71843	-10.1092	15	21	10	CDS		0	0
hsa-miR-4421	NM_001346897	EGFR	ACCTGTCTGTGGAAAGGAGCTA#AGCTCAGACCCCACAGGCGC#...(((((((((....(((((.#))))).....))))))))).	3333	3353	0.923077	-21.3	0	0.0105466	0.426	2.87608	2.68366	-9.62901	14	20	9	CDS		0	0
hsa-miR-4423-3p	NM_001346897	EGFR	ATAGGCACCAAAAAGCAACAA#GCTTTGGTGCCA#...(((((((..((((.....#))))))))))).	982	994	0.846154	-18.1	0	0.00148458	0.485	5.8835	4.24975	-12.6861	11	12	11	CDS		0	0
hsa-miR-378g	NM_001346897	EGFR	ACTGGGCTTGGAGTCAGAAG#CTGACTCCGTCCAGTA#(((((((..((((((((...#))))))))))))))).	205	221	0.923077	-24.7	1	0.0102711	0.338	-0.0151058	-0.305519	-7.3076	15	16	15	5UTR		0	0
hsa-miR-4425	NM_001346897	EGFR	TGTTGGGATTCAGCAGGACCAT#GGGACTCTGGATCCCAGA#..(((((((((((.((..((..#))..))))))))))))).	2309	2327	1	-24.3	1	5.44e-05	0.5	5.65542	5.47681	-5.81384	15	18	13	CDS		0	0
hsa-miR-4425	NM_001346897	EGFR	TGTTGGGATTCAGCAGGACCAT#ATGGTCAAGTGCTGGATGATAGACGCAGATAGTCGCCCAAA#..(((((((((((((.((((((#))))))...))))))))..................))))).	2964	3005	0.846154	-21	1	0.0210864	0.515	5.96292	5.16168	-5.19005	19	41	8	CDS		0	0
hsa-miR-4428	NM_001346897	EGFR	CAAGGAGACGGGAACATGGAGC#TCCCTGTTCTCTCTGCTG#..((.(((.(((((((.(((..#))).)))))))))).)).	3751	3769	0.846154	-18.8	0	0.0050078	0.574	-0.466542	-0.185826	-10.1324	15	18	10	3UTR		0	1
hsa-miR-4429	NM_001346897	EGFR	AAAAGCTGGGCTGAGAGGCG#GCCTCTTACACCCAGTG#....((((((.((((((((.#))))))))..)))))).	2195	2212	0.923077	-23.5	0	0.00102832	0.426	4.38767	4.34622	-12.3713	14	17	8	CDS		0	0
hsa-miR-4430	NM_001346897	EGFR	AGGCTGGAGTGAGCGGAG#CTCTGCTGGCTCTATCTTG#(((.((((((.(((((((#))))))).)))))).))).	3761	3780	0.923077	-21.9	0	0.00361534	0.632	0.0341776	-0.196779	-9.79437	16	19	7	3UTR		0	0
hsa-miR-4430	NM_001346897	EGFR	AGGCTGGAGTGAGCGGAG#CTGCGCTCTGCCCGGCG#..(((((.(((((((.((#)).))))).))))))).	307	324	0.846154	-21.1	0	1.48e-06	0.338	-0.0373593	0.973031	-7.50368	14	17	7	CDS		0	0
hsa-miR-4433a-3p	NM_001346897	EGFR	ACAGGAGTGGGGGTGGGACAT#GTGTGCCCACTACATTGACGGCCCCCACTGCGTCAAGACCTGC#.((((((((((((((((((((#)))).)))............))))))))).........)))).	1868	1911	0.923077	-26.1	1	6.87e-05	0.397	3.54806	3.19854	-3.79332	20	43	9	CDS		0	0
hsa-miR-4433a-3p	NM_001346897	EGFR	ACAGGAGTGGGGGTGGGACAT#GTCACGGACTCCCCTCCTGA#.((((((.((((((..(((..#)))....)))))))))))).	3212	3232	1	-25.1	1	0.00065316	0.412	3.4641	3.5521	-7.07546	15	20	12	CDS		0	0
hsa-miR-4433a-3p	NM_001346897	EGFR	ACAGGAGTGGGGGTGGGACAT#CCTGCCCCCCACTCATGC#.((.(((((((((((((....#))))))))).)))).)).	913	931	0.846154	-24.8	0	0.129106	0.412	3.04101	4.02309	-6.82535	15	18	9	CDS		0	0
hsa-miR-4438	NM_001346897	EGFR	CACAGGCTTAGAAAAGACAGT#TCCGAGCCTGTGG#(((((((((.((.........#)).))))))))).	1048	1061	0.923077	-17.3	1	2.03e-06	0.382	3.83939	4.48587	-8.29455	11	13	9	CDS		0	0
hsa-miR-4439	NM_001346897	EGFR	GTGACTGATACCTTGGAGGCAT#CCTCCATCAGTGGCG#((.(((((.....((((((...#))))))))))).)).	1213	1228	0.846154	-18.2	0	0.0017689	0.529	2.52426	2.84892	-15.2547	13	15	11	CDS		0	0
hsa-miR-4440	NM_001346897	EGFR	TGTCGTGGGGCTTGCTGGCTTG#CAGGCTGCACAGGCCCCCGGGAGAGCGACT#.(((((((((((((.(((((((#)))))))..)))))))).......))))).	838	868	0.923077	-26.6	1	0.00144417	0.353	3.67969	3.91407	-4.52877	20	30	8	CDS		0	0
hsa-miR-4441	NM_001346897	EGFR	ACAGGGAGGAGATTGTA#GCGATCTCCACATCCTGC#.(((((.(((((((((.#)))))))))...))))).	1225	1243	0.846154	-19.7	0	0.000878176	0.456	3.83939	3.24441	-5.33701	14	18	9	CDS		0	0
hsa-miR-4441	NM_001346897	EGFR	ACAGGGAGGAGATTGTA#ACATACTCCTCCTCTGG#.((((((((((..(((.#)))..))))))).))).	1271	1288	0.923077	-19.7	1	0.00230723	0.529	2.13003	3.32179	-8.42926	13	17	7	CDS		0	0
hsa-miR-4442	NM_001346897	EGFR	GCCGGACAAGAGGGAGG#CCTCCTCTTGCTGCTGGTG#(((((.(((((.(((((#))))))))))...))))).	2084	2103	0.846154	-20	0	0.00138761	0.309	2.68112	1.91858	-9.18534	15	19	10	CDS		0	0
hsa-miR-4443	NM_001346897	EGFR	TTGGAGGCGTGGGTTTT#AAGACTCACTCTCCAT#.((((((.(((((((((#))))))))))))))).	1162	1178	0.923077	-18.3	1	0.0701352	0.676	0.927808	4.05864	-6.10696	15	16	15	CDS		0	0
hsa-miR-4443	NM_001346897	EGFR	TTGGAGGCGTGGGTTTT#CTCAGCCTCCAGA#((((((((.((((....#)))))))))))).	405	418	1	-18	1	0.00138784	0.559	2.71457	3.23573	-6.8193	12	13	12	CDS		0	0
hsa-miR-4446-5p	NM_001346897	EGFR	ATTTCCCTGCCATTCCCTTGGC#GCCTAAGATCCCGTCCATCGCCACTGGGATGGTGGGGGC#...(((((((((((((..((((#.))))..))))))))))))).	2045	2084	1	-28.3	0	3.19e-06	0.324	1.97614	2.39955	-6.51454	17	21	13	CDS		0	0
hsa-miR-4446-5p	NM_001346897	EGFR	ATTTCCCTGCCATTCCCTTGGC#GCCAAGGGAGTTTGTGGAGAAC#..(((.((((.(((((((((((#)))))))))))..)))).))).	1760	1782	1	-23.2	0	0.000378026	0.456	3.58464	2.98565	-9.68273	18	22	11	CDS		0	0
hsa-miR-4447	NM_001346897	EGFR	GGTGGGGGCTGTTGTTT#GCAGCAGCCTCCGCCC#(((((((((((((((..#))))))))))))))).	33	49	0.923077	-29	1	0.000112261	0.147	-0.0826087	-0.0904301	-4.17062	15	16	15	5UTR		0	0
hsa-miR-4447	NM_001346897	EGFR	GGTGGGGGCTGTTGTTT#GACGGCCCCCACTG#(((((((((((((....#))))))))))))).	1884	1898	0.846154	-26.3	1	0.000430198	0.382	3.6689	3.19746	-5.76291	13	14	13	CDS		0	0
hsa-miR-4447	NM_001346897	EGFR	GGTGGGGGCTGTTGTTT#GGCAGCCCCCGGCG#(.(((((((((((....#))))))))))).).	9	23	0.923077	-24.4	1	4.04e-08	0.154	0	0	-6.92659	12	14	11	5UTR		0	0
hsa-miR-4450	NM_001346897	EGFR	TGGGGATTTGGAGAAGTGGTGA#CACCACGTACCAGATGGATGTGAACCCCGA#(((((((((((....((((((.#))))))...)))))).........))))).	941	971	0.846154	-21.9	1	0.000158124	0.426	4.03004	4.34076	-10.1658	17	30	6	CDS		0	0
hsa-miR-4451	NM_001346897	EGFR	TGGTAGAGCTGAGGACA#CCCCAGCGCTACCT#.(((((.((((.((...#)).)))).))))).	3048	3062	0.871795	-17.8	0	0.00656601	0.485	5.04704	4.76735	-9.65231	11	14	5	CDS		0	0
hsa-miR-4453	NM_001346897	EGFR	GAGCTTGGTCTGTAGCGGTT#ATACGCGGCAGGACCAAGCA#..(((((((((((.(((..(#)..))).)))).))))))).	1401	1421	0.923077	-21.8	1	4.32e-05	0.529	5.5068	2.77795	-5.81384	15	20	7	CDS		0	0
hsa-miR-4454	NM_001346897	EGFR	GGATCCGAGTCACGGCACCA#GGTGCGTTCGGCACGGTGTATAAGGGACTCTGGATCCC#(((((((((((...(((((.#.)))))......))))).)))))).	2286	2324	0.923077	-25.2	1	0.000131884	0.471	5.18471	5.66927	-9.43035	16	25	6	CDS		0	0
hsa-miR-4454	NM_001346897	EGFR	GGATCCGAGTCACGGCACCA#TGGGAGTTGATGACCTTTGGATCCA#((((((((((((((((.(((#)))..)))).))))..)))))))).	2838	2863	0.884615	-23.1	1	0.00175993	0.456	5.566	5.09789	-3.93757	19	25	8	CDS		0	0
hsa-miR-4456	NM_001346897	EGFR	CCTGGTGGCTTCCTTTT#AATGGGAGCTGCTGGGG#(((((((((((((.((.#)).))))))))))))).	711	728	0.961538	-20	1	0.000264005	0.456	4.43956	3.26518	-4.79441	15	17	13	CDS		0	0
hsa-miR-4456	NM_001346897	EGFR	CCTGGTGGCTTCCTTTT#GGAGGCTGCTGCAGGA#(((((((((((((....#)))))))))..)))).	2164	2180	1	-19	1	4.73e-06	0.368	3.88819	4.01283	-5.76291	13	16	9	CDS		0	0
hsa-miR-4458	NM_001346897	EGFR	AGAGGTAGGTGTGGAAGAA#TCTCCACATCCTGCCG#...(((((((((((.(((.#)))))))).)))))).	1229	1245	0.820513	-21	0	0.000786483	0.441	2.20778	3.43725	-7.24999	14	16	8	CDS		0	0
hsa-miR-378h	NM_001346897	EGFR	ACTGGACTTGGTGTCAGATGG#CCACCGCGCACGGCCCCCTGACTCCGTCCAGTA#(((((((..((.(((((..((#.))..))))).))))))))).	188	221	1	-22.2	1	0.0102711	0.338	-0.223339	-0.354478	-10.6544	16	21	9	5UTR		0	0
hsa-miR-378h	NM_001346897	EGFR	ACTGGACTTGGTGTCAGATGG#CCTCCTGGACTATGTCCGGG#.((((((.((((.((((..((#))..)))))))).)))))).	2516	2536	0.846154	-19.6	1	4.24e-08	0.456	2.64668	5.04106	-7.39609	16	20	8	CDS		0	0
hsa-miR-378h	NM_001346897	EGFR	ACTGGACTTGGTGTCAGATGG#CATTTGCCAAGTCCT#...((((((((...((((((.#)))))))))))))).	3087	3102	0.923077	-18.7	0	0.0143631	0.515	4.98621	4.71323	-12.0073	14	15	14	CDS		0	0
hsa-miR-3135b	NM_001346897	EGFR	GGCTGGAGCGAGTGCAGTGGTG#CGCTCCTGGCGCTGCTGGCTGCGCTCTGCCCGGCG#.(((((.(((((((((((((((#.))))....))))))))).))))))).	289	324	0.846154	-29.3	0	1.48e-06	0.338	-0.0173308	0.679649	-5.33701	20	27	9	CDS		0	0
hsa-miR-4462	NM_001346897	EGFR	TGACACGGAGGGTGGCTTGGGAA#TCCCTCAGCCACCCATATGTACCATCGATGTCT#.((((..((((((((((.((((.#))))..))))))))..........))..)))).	2923	2956	0.923077	-27.4	0	0.0271561	0.515	5.73936	5.76127	-7.23797	18	33	8	CDS		0	0
hsa-miR-4463	NM_001346897	EGFR	GAGACTGGGGTGGGGCC#CCCACTCAGCAGCAGCCAGTCTCC#((((((((((((((...#)))))).........)))))))).	3442	3466	0.846154	-22.3	1	0.019173	0.368	-0.104038	-0.121525	-4.90607	14	24	8	CDS		0	0
hsa-miR-4464	NM_001346897	EGFR	AAGGTTTGGATAGATGCAATA#TGCATTTGCCAAGTCCTA#.((((((((.((((((((...#))))))))))))).))).	3085	3103	0.884615	-18	1	0.0127934	0.515	5.22565	4.67826	-5.03583	16	18	13	CDS		0	0
hsa-miR-4464	NM_001346897	EGFR	AAGGTTTGGATAGATGCAATA#CGTGCGTCCGAGCCTG#.((((((((((..(((.....#)))..)))))))))).	1042	1058	1	-16.8	1	1.04e-06	0.412	3.62981	4.51782	-8.42926	13	16	10	CDS		0	0
hsa-miR-4465	NM_001346897	EGFR	CTCAAGTAGTCTGACCAGGGGA#CTCCTGGCGCTGCTGGCTGCGCTCTGCCCGGCGAGTCGGGCTCTGGAGG#(((.((.((((((((((((((.#)))))))............................))))))))).))).	291	340	0.846154	-22.2	0	4.87e-05	0.397	-0.197906	1.35396	-8.51328	19	49	9	CDS		0	0
hsa-miR-4465	NM_001346897	EGFR	CTCAAGTAGTCTGACCAGGGGA#CCCTGGTCTGGAAGTACG#.....(((.(((((((((((..#)))))))).)))..))).	1939	1957	0.923077	-20.3	0	2.54e-05	0.412	3.72565	3.27437	-14.722	14	18	8	CDS		0	0
hsa-miR-4469	NM_001346897	EGFR	GCTCCCTCTAGGGTCGCTCGGA#CCGAGGGCTGCTGGGGCCCGGAGCC#(((((((((((((((.(((((.#))))))))).))))))...))))).	1660	1685	0.846154	-28.1	1	1.49e-08	0.309	4.97724	2.18189	-4.17062	20	25	9	CDS		0	0
hsa-miR-4470	NM_001346897	EGFR	TGGCAAACGTGGAAGCCGAGA#CGGCCATGTGTGCCAC#(((((.(((((...((((...#))))))))).))))).	1964	1980	0.846154	-19	0	0.000281792	0.397	-0.0442444	3.56198	-11.3313	14	16	9	CDS		0	0
hsa-miR-4472	NM_001346897	EGFR	GGTGGGGGGTGTTGTTTT#AGACGACACCTTCCTCCC#((.((((((((((((((.#)))))))))))))).)).	3371	3389	0.892308	-23.7	0	0.0239347	0.426	2.38649	1.61026	-5.49511	16	18	14	CDS		0	0
hsa-miR-4472	NM_001346897	EGFR	GGTGGGGGGTGTTGTTTT#AGGACACCTGCCCCCCACTC#(((((((((((.((((((#)))))).).)))))))))).	907	927	0.846154	-23.5	1	0.079288	0.397	2.81712	4.0126	-7.28438	17	20	10	CDS		0	0
hsa-miR-4472	NM_001346897	EGFR	GGTGGGGGGTGTTGTTTT#AAAACAACACCCTGGTCTGGAAGTACGCAGACGCCGGCCA#(((.((((((((((((((#)))))))))))).....................)).))).	1930	1970	0.846154	-22.9	0	5.39e-06	0.426	3.59772	3.41155	-6.9696	17	40	12	CDS		0	0
hsa-miR-4473	NM_001346897	EGFR	CTAGTGCTCTCCGTTACAAGTA#TGTAACGGAATAGGTATTGGT#((((((((.(((((((((....#)))))))))...)))))))).	1134	1155	0.846154	-20.6	1	0.00932372	0.559	4.50048	3.44309	-4.99396	17	21	9	CDS		0	0
hsa-miR-4473	NM_001346897	EGFR	CTAGTGCTCTCCGTTACAAGTA#ACCTGTGCCATCCAAACTGCACCTACGGATGCACTGGG#(((((((..(((((....(((.#.)))......))))).))))))).	1978	2016	1	-19.5	1	0.00176811	0.426	5.25758	2.43582	-8.2761	15	24	7	CDS		0	0
hsa-miR-4473	NM_001346897	EGFR	CTAGTGCTCTCCGTTACAAGTA#GCTGTCCCAATGGGAGCTGCTGGG#(((((((((.(((((((.(((.#)))))...))))))))).))))).	703	727	0.846154	-18	1	0.000265009	0.456	4.37737	3.09004	-5.18008	19	24	9	CDS		0	0
hsa-miR-4476	NM_001346897	EGFR	CAGGAAGGATTTAGGGACAGGC#GCCCCCTGACTCCGTCCA#..(((.(((.((((((...(((#))))))))).))).))).	200	218	1	-20.2	0	0.0140267	0.324	0.107291	-0.354478	-8.10047	15	18	9	5UTR		0	1
hsa-miR-4478	NM_001346897	EGFR	GAGGCTGAGCTGAGGAG#CCTGGGGATCGGCCTCT#((((((((.((.(((..#))).))..)))))))).	2108	2125	0.846154	-21.6	1	1.3e-05	0.368	2.83803	2.95064	-8.57382	13	17	8	CDS		0	1
hsa-miR-3689c	NM_001346897	EGFR	CTGGGAGGTGTGATATTGTGGT#CCACTGCGTCAAGACCTGCCCGGC#(((((((((.((((...((((.#))))...))))..)))).))))).	1892	1916	0.846154	-22	1	6.41e-05	0.397	3.50936	3.36685	-6.14858	17	24	5	CDS		0	0
hsa-miR-3689d	NM_001346897	EGFR	GGGAGGTGTGATCTCACACTCG#GGAGAACGCCTCCCT#(((((((((..(((........#)))..))))))))).	2913	2928	1	-21.2	1	0.000174706	0.471	4.39937	5.29608	-8.97335	12	15	9	CDS		0	0
hsa-miR-3689d	NM_001346897	EGFR	GGGAGGTGTGATCTCACACTCG#TGGGATTACGCTCCCT#((((.(((((((((((......#))))))))))))))).	1468	1484	0.923077	-22	0	1.29e-05	0.544	3.99176	3.08853	-8.05661	15	16	15	CDS		0	0
hsa-miR-3689e	NM_001346897	EGFR	TGTGATATCATGGTTCCTGGGA#CCCAGAGTGCCTGCCTCAGGCCATGAACATCACC#.(((((.((((((..((((((.#.))))))))))))..))))).	1802	1836	1	-21.6	0	0.00142846	0.412	4.00227	2.96654	-6.9293	17	21	12	CDS		0	0
hsa-miR-3689e	NM_001346897	EGFR	TGTGATATCATGGTTCCTGGGA#TCCACAGGAACTGGATATTC#...((((((..(((((((((((#))).)))))))).)))))).	1289	1309	1	-21	0	0.00211386	0.559	3.30311	3.47366	-10.5818	17	20	8	CDS		0	0
hsa-miR-3689f	NM_001346897	EGFR	TGTGATATCGTGCTTCCTGGGA#TCTTCGGGGAGCAGCGATGCGACC#.((..(((((((((((((((((#))).))))))))).)))))..)).	245	269	0.846154	-21.6	0	6.74e-05	0.25	-0.164441	-0.206489	-10.9444	19	24	9	5UTR		0	0
hsa-miR-3155b	NM_001346897	EGFR	CCAGGCTCTGCAGTGGGA#TCCCACAGCAGGGCTTC#..(((((((((.((((((#)))))).))))))))).	3178	3195	0.846154	-25.2	1	0.000352631	0.368	4.65747	3.95922	-8.3038	15	17	9	CDS		0	0
hsa-miR-3155b	NM_001346897	EGFR	CCAGGCTCTGCAGTGGGA#CGCTGCGGAGGCTGC#.(((.((((((((((...#)))))))))).))).	2158	2173	0.923077	-23.9	0	1.02e-06	0.338	2.76169	3.87603	-8.14541	13	15	10	CDS		0	0
hsa-miR-548ak	NM_001346897	EGFR	AAAAGTAACTGCGGTTTTTGA#TCAAAAACTGCAC#.........((((((((((((#)))))))))))).	1201	1214	0.846154	-14.9	0	0.361363	0.574	4.40202	2.82194	-20.4803	12	13	12	CDS		0	0
hsa-miR-4482-5p	NM_001346897	EGFR	AACCCAGTGGGCTATGGAAATG#TCCATCGCCACTGGGA#..((((((.(((.(((((....#))))).))))))))).	2058	2074	0.923077	-23	1	8.93e-06	0.368	3.54655	1.86761	-7.30252	14	16	9	CDS		0	0
hsa-miR-4482-5p	NM_001346897	EGFR	AACCCAGTGGGCTATGGAAATG#CGTGTGCCGCCTGCTGGGC#..((((((((((...((.....#.)))))))))))).	2444	2463	0.923077	-20.2	1	1.73e-06	0.324	4.87031	5.5187	-7.83842	12	14	12	CDS		0	0
hsa-miR-4482-3p	NM_001346897	EGFR	TTTCTATTTCTCAGTGGGGCTC#GCCCGGCAGGAGTCATGGGAGA#(((((((..(((.((.((((..#)))).))..)))..))))))).	1909	1931	0.923077	-21.2	1	3.23e-06	0.412	2.53736	3.35018	-8.82978	16	22	7	CDS		0	0
hsa-miR-4483	NM_001346897	EGFR	GGGGTGGTCTGTTGTTG#CCCAGACCGGACGACAGGCCACCTC#((((((((((((((((.#.))))))))))))))))	120	145	1	-27.3	1	2.39e-05	0.176	-0.115248	-0.352252	-3.93757	16	17	16	5UTR		0	0
hsa-miR-4484	NM_001346897	EGFR	AAAAGGCGGGAGAAGCCCCA#GGGCTTCTTCAGCA#.....((.((((((((((..#)))))))))).)).	3188	3202	0.923077	-21.3	0	0.000485878	0.353	5.06489	3.72674	-15.9792	12	14	10	CDS		0	0
hsa-miR-4486	NM_001346897	EGFR	GCTGGGCGAGGCTGGCA#GCCGCCGCCGCCCAGA#.(((((((.(((.(((.#))))))..))))))).	110	126	0.846154	-26.4	1	0.000138674	0.206	0.488787	-0.352252	-6.13885	13	16	7	5UTR		0	0
hsa-miR-4486	NM_001346897	EGFR	GCTGGGCGAGGCTGGCA#GCCAGTCTCCAGTGTCCAAGCC#((((((((((((((((.#)))))))))....))))).)).	3456	3478	0.923077	-25.3	1	0.114182	0.353	-0.516898	-0.76357	-3.93757	16	22	9	CDS		0	0
hsa-miR-4487	NM_001346897	EGFR	AGAGCTGGCTGAAGGGCAG#CTGTTCTCTCTGCTGGCTCTA#(((((((((.(((((((((#))))))).)).))))))))).	3754	3775	1	-23.3	1	0.00517634	0.603	-0.312154	-0.23256	-5.18008	18	21	9	3UTR		0	0
hsa-miR-4489	NM_001346897	EGFR	TGGGGCTAGTGATGCAGGACG#CGGCCGGAGTCCCGAGCTAGCCCCGG#((((((((((..((..((((.#.)))))).)))))))))).	82	108	0.846154	-25.6	1	1.64e-05	0.176	0.133996	-0.245434	-11.0777	16	19	10	5UTR		0	0
hsa-miR-4490	NM_001346897	EGFR	TCTGGTAAGAGATTTGGGCATA#GCCCAGGGACTGCGTCTCTTGCCGGAA#(((((((((((((((((((...#)))))).......))))))))))))).	1682	1709	0.923077	-29	1	0.000881283	0.324	2.67661	2.85847	-3.93757	19	27	13	CDS		0	0
hsa-miR-4491	NM_001346897	EGFR	AATGTGGACTGGTGTGACCAAA#ACGCCGGCCATGTG#.((((((.(((((((.......#))))))))))))).	1960	1974	1	-17.1	1	5.01e-05	0.412	2.93586	3.36783	-6.34001	13	14	13	CDS		0	0
hsa-miR-4492	NM_001346897	EGFR	GGGGCTGGGCGCGCGCC#GGCGTCCGCCCGAGTCCCC#(((((((((((.(((((#))))).))))).)))))).	148	167	0.846154	-30.5	1	0.00161767	0.235	-0.404549	-0.109685	-7.28438	16	19	6	5UTR		0	1
hsa-miR-4493	NM_001346897	EGFR	AGAAGGCCTTTCCATCTCTGT#ATGGAGGAAGACGGCGTCCGCAAGTGTAAGAAGTGCGAAGGGCCTTG#..(((((((((((((.(((..#.))).))).)))))))))).	1077	1124	0.923077	-21.8	1	0.0001506	0.471	3.57013	3.93363	-5.19005	16	20	10	CDS		0	0
hsa-miR-4494	NM_001346897	EGFR	CCAGACTGTGGCTGACCAGAGG#CCTCTGGATCCACAGGAACTGGA#((((.((((((....(((((((#)))))))..))))))...)))).	1281	1304	0.846154	-26.1	0	0.000200232	0.559	1.55802	3.32934	-14.2848	17	23	7	CDS		0	0
hsa-miR-4495	NM_001346897	EGFR	AATGTAAACAGGCTTTTTGCT#GCGAAGGGCCTTGCCGCAA#..(((....(((((((((((.#)))))))))))....))).	1111	1130	0.846154	-17.3	0	0.000150436	0.5	4.19487	3.27694	-11.7717	14	19	11	CDS		0	0
hsa-miR-4497	NM_001346897	EGFR	CTCCGGGACGGCTGGGC#TCCAAGCTGTCCCAATGGGAGC#((((((((((((((((.#)))).))))))))....)))).	698	720	0.923077	-23.8	1	3.31e-06	0.412	2.45488	2.90674	-3.93757	16	22	8	CDS		0	0
hsa-miR-4498	NM_001346897	EGFR	TGGGCTGGCAGGGCAAGTGCTG#CAGCGCTCCTGGCGCTGCTGGCTG#..(((((((((.((.(((((((#)))))))....)).))))))))).	286	310	0.846154	-27.9	1	8.76e-07	0.206	0.671058	0.592805	-9.03925	18	24	9	CDS		0	0
hsa-miR-4502	NM_001346897	EGFR	GCTGATGATGATGGTGCTGAAG#GGCGCCACATCGTTCGGAAGCG#((((((((((.(((((((....#))))))))))))))....))).	2134	2156	0.923077	-21.6	1	0.00377216	0.324	3.54508	3.28586	-6.76235	17	22	14	CDS		0	0
hsa-miR-4502	NM_001346897	EGFR	GCTGATGATGATGGTGCTGAAG#GCACCTCCATCAGTGGCG#(((..(((((..(((((.....#)))))..)))))..))).	1210	1228	0.923077	-21.2	0	0.0017689	0.529	6.88319	2.91507	-17.2602	13	18	5	CDS		0	0
hsa-miR-4505	NM_001346897	EGFR	AGGCTGGGCTGGGACGGA#CCGGCGCAGCGCGGCCG#.(((((.((((.(.(((.#))).).)))).))))).	17	34	0.923077	-25.8	0	1.46e-06	0.19	0.445551	-0.209951	-9.54065	13	17	5	5UTR		0	0
hsa-miR-4505	NM_001346897	EGFR	AGGCTGGGCTGGGACGGA#TCCGCCCGAGTCCCCGCCTC#((((.((((((((.((((#))))))).)).))).)))).	152	172	0.846154	-24.2	0	0.0068622	0.235	-0.453507	-0.0996704	-8.91345	16	20	7	5UTR		0	0
hsa-miR-4506	NM_001346897	EGFR	AAATGGGTGGTCTGAGGCAA#TGGAGAAAGGAGAACGCCTCCCTCAGCCACCCATA#..((((((((.((((((...#.)))))))))))))).	2905	2940	0.871795	-26.1	1	0.109624	0.5	6.04484	5.43222	-7.78178	14	16	14	CDS		0	0
hsa-miR-4506	NM_001346897	EGFR	AAATGGGTGGTCTGAGGCAA#TGCCTCAGGCCATGAACATC#..(((.(((((((((((((.#)))))))))))))...))).	1813	1833	0.846154	-24.9	0	0.00145552	0.382	1.76696	3.0799	-6.85796	16	20	13	CDS		0	0
hsa-miR-2392	NM_001346897	EGFR	TAGGATGGGGGTGAGAGGTG#CGCCTGCTGGGCATCTGCCTCACCTCCACCG#..((.(((((((((((((((#.)))))..)))))))))))).	2451	2482	0.846154	-24.1	0	0.0358135	0.353	5.91413	5.43329	-9.07604	17	21	12	CDS		0	0
hsa-miR-4508	NM_001346897	EGFR	GCGGGGCTGGGCGCGCG#CGTCCGCCCGAGTCCCCGCC#(((((((((((((.(((#))).))))).)).)))))).	150	170	0.846154	-28.5	1	0.00423544	0.235	-0.397131	-0.135277	-4.79441	16	20	6	5UTR		0	0
hsa-miR-4510	NM_001346897	EGFR	TGAGGGAGTAGGATGTATGGTT#AACATAACATCCTTGGGATTACGCTCCCTCAA#((((((((((((((((...(((#)))...))))))).........))))))))).	1455	1487	0.846154	-24.5	1	1.72e-05	0.574	2.88857	3.30801	-3.93757	19	32	9	CDS		0	0
hsa-miR-4511	NM_001346897	EGFR	GAAGAACTGTTGCATTTGCCCT#AGGGAATGCGTGGACAAGTGCAACCTTCTG#..((((..((((((((((((..#.)).)))))))))).)))).	1722	1752	0.846154	-18.3	0	0.00763465	0.426	3.37831	3.07912	-8.81432	16	20	10	CDS		0	0
hsa-miR-4512	NM_001346897	EGFR	CAGGGCCTCACTGTATCGCCCA#GGGCTGCTGGGGCCCG#..((((((((..(((..((((.#))))))))))))))).	1664	1680	0.846154	-24.9	1	7.12e-09	0.294	6.86658	2.24276	-11.3616	15	16	15	CDS		0	0
hsa-miR-4512	NM_001346897	EGFR	CAGGGCCTCACTGTATCGCCCA#TGGGCCTAAGATCCCGTCCATCGCCACTGGGATGGTGGGGGCCCTC#.(((((((((((((.(((((((#))))).......................)).))))))))).)))).	2042	2088	0.846154	-24.1	1	7.57e-08	0.338	3.23747	1.9185	-4.52877	20	46	9	CDS		0	0
hsa-miR-4513	NM_001346897	EGFR	AGACTGACGGCTGGAGGCCCAT#TGGGACCTCCGGTCA#........(((((((((((((.#)))).))))))))).	1568	1583	1	-24.4	0	2.46e-05	0.618	1.81659	2.26969	-19.4239	13	15	9	CDS		0	0
hsa-miR-4514	NM_001346897	EGFR	ACAGGCAGGATTGGGGAA#TCTCCACATCCTGCCGGTG#((.((((((((((((((.#)))))).)))))))).)).	1229	1248	0.846154	-24.3	0	5.14e-05	0.441	2.31749	3.36762	-5.49511	16	19	8	CDS		0	0
hsa-miR-4514	NM_001346897	EGFR	ACAGGCAGGATTGGGGAA#CCCCGGGAGAGCGACTGCCTGG#.(((((((..((((((..#))))))........))))))).	852	874	0.846154	-21.3	1	6.23e-06	0.324	5.79093	4.2039	-6.09222	13	22	7	CDS		0	0
hsa-miR-4516	NM_001346897	EGFR	GGGAGAAGGGTCGGGGC#CCCCACAGGCGCCTTGACTGAGGACAGCATAGACGACACCTTCCTCCCA#(((((((((((((((((#.))))))))....................))))).)))).	3341	3390	0.923077	-23.5	1	0.0237097	0.441	1.87413	1.76141	-3.93757	17	40	8	CDS		0	0
hsa-miR-4518	NM_001346897	EGFR	GCTCAGGGATGATAACTGTGCTGAGA#TTCGGCACGGTGTATAAGGGACTCTGGATCCCAGAAGGTGAGA#.(((((((((....(((((((((((.#)))))))))))................)))))......)))).	2292	2335	0.846154	-23.5	1	0.000149755	0.529	5.26007	5.55738	-12.1109	20	43	11	CDS		0	0
hsa-miR-4519	NM_001346897	EGFR	CAGCAGTGCGCAGGGCTG#CGGCCGGGGCAGCGCTCCTGGCGCTGCTGG#(((((((((.((((((((#.))))...))))))))))))).	277	307	1	-27.9	1	5.69e-07	0.206	-0.120193	0.0683469	-5.18008	17	22	13	CDS		0	0
hsa-miR-4520-5p	NM_001346897	EGFR	CCTGCGTGTTTTCTGTCCAA#TCAGCCGAGGCAGGGAATGCGTGGA#.((((((((((((((((...#.)))))))))))))))).	1711	1736	1	-21.1	1	0.000179785	0.412	2.14151	3.54309	-3.79332	16	18	16	CDS		0	0
hsa-miR-4520-3p	NM_001346897	EGFR	TTGGACAGAAAACACGCAGGAA#TCTGTGTGTGTGAGTGTTCAT#.((((((....(((((((((..#))))))))).....)))))).	3672	3693	0.923077	-19.4	1	0.00931785	0.588	-0.269963	-0.329679	-11.2306	15	21	9	3UTR		0	0
hsa-miR-4521	NM_001346897	EGFR	GCTAAGGAAGTCCTGTGCTCAG#GCAGGGCTTCTTCAGCA#(((.((((((((((((......#)))))))))))).))).	3185	3202	1	-23.5	0	0.000485878	0.353	4.94631	3.82268	-6.9696	15	17	12	CDS		0	1
hsa-miR-1269b	NM_001346897	EGFR	CTGGACTGAGCCATGCTACTGG#CCAGTGCCTGGTGAGTGGCTTGTCTGGA#((((((.(((((((((.(((((#))))))).......))))))))))))).	3387	3415	0.846154	-23	0	2.77e-07	0.412	2.75155	0.559917	-5.48126	20	28	13	CDS		0	0
hsa-miR-1269b	NM_001346897	EGFR	CTGGACTGAGCCATGCTACTGG#CCAGGAGGTGGCTGGTTATGTCCT#..((((..(((((.((((((..#.)))))))))))..)))).	506	530	1	-22.4	0	0.00193058	0.5	4.59924	3.26299	-9.67116	15	19	11	CDS		0	0
hsa-miR-4524a-5p	NM_001346897	EGFR	ATAGCAGCATGAACCTGTCTCA#GAGGCAGGGAATGCGTGG#....((((((...((((((((.#))))))))..)))).)).	1717	1735	0.846154	-21	0	0.000117088	0.412	1.879	3.56204	-17.0073	14	18	8	CDS		0	0
hsa-miR-4525	NM_001346897	EGFR	GGGGGGATGTGCATGCTGGTT#AACCAGTGTGCTGCAGGCTGCACAGGCCCCCG#(((((..((((((((((((((#))))))))..........))))))..))))).	825	857	0.923077	-28.6	0	0.000115997	0.338	4.79202	3.63812	-7.38222	19	32	8	CDS		0	0
hsa-miR-4527	NM_001346897	EGFR	TGGTCTGCAAAGAGATGACTGT#CAGCATCTCCAGAGGGGGAAACAGTGGCAGATTTGCAGACACAG#(((((((((((((((((.(((.#)))))))))......................))))))))).)).	3490	3534	0.846154	-22.1	1	0.00181339	0.5	-0.775114	-0.754008	-3.93757	20	44	9	CDS		0	0
hsa-miR-4527	NM_001346897	EGFR	TGGTCTGCAAAGAGATGACTGT#CAGTTTTCTCTTGCAGTCG#..(.((((.((((((.(((((.#))))).)))))))))).).	1428	1447	1	-20.6	0	0.0278293	0.529	3.45276	3.70142	-9.27846	16	19	10	CDS		0	0
hsa-miR-4529-5p	NM_001346897	EGFR	AGGCCATCAGCAGTCCAATGAA#CACTGGGATGGTGGGGGCCCTCCTCTTGCTGCTGGTGGTGGCCC#.((((((((.((((.(((.((.#.)))))..)))).)))))))).	2066	2110	0.820513	-23.3	1	8.45e-06	0.309	2.92244	2.0013	-5.77128	17	22	8	CDS		0	0
hsa-miR-4529-5p	NM_001346897	EGFR	AGGCCATCAGCAGTCCAATGAA#TCTGCCATGCCTTGTGCTCCCCCGAGGGCTGCTGGGGCCC#.((((.((((((((((......#.)))))))))))))).	1639	1679	0.846154	-27.3	0	4.19e-08	0.279	2.54839	2.68506	-5.69428	14	16	14	CDS		0	0
hsa-miR-4529-3p	NM_001346897	EGFR	ATTGGACTGCTGATGGCCCGT#GCGCGGCCGCAGCAGCCT#...((.((((((.((((((((#))).))))))))))))).	25	43	0.846154	-25.8	0	1.44e-05	0.162	-0.110302	-0.185348	-9.70463	16	18	13	5UTR		0	0
hsa-miR-4530	NM_001346897	EGFR	CCCAGCAGGACGGGAGCG#CGTGTGCCGCCTGCTGGGC#(((((((((.(((..(((#)))...)))))))))))).	2444	2463	0.846154	-26.7	1	1.73e-06	0.324	4.82021	5.28464	-6.77237	15	19	12	CDS		0	0
hsa-miR-4531	NM_001346897	EGFR	ATGGAGAAGGCTTCTGA#TCAGTGGCGATCTCCAC#.((((((..(((.((((#)))).)))..)))))).	1219	1236	0.846154	-18.7	1	0.000179543	0.456	2.50316	3.03641	-8.45248	13	17	6	CDS		0	0
hsa-miR-4534	NM_001346897	EGFR	GGATGGAGGAGGGGTCT#GGCCCCCTGACTCCGTCCA#((((((((..((((((.#))))))....)))))))).	199	218	1	-26.8	1	0.0140267	0.324	-0.460184	-0.253222	-6.23647	14	19	8	5UTR		0	0
hsa-miR-4534	NM_001346897	EGFR	GGATGGAGGAGGGGTCT#ACTCCTCCTCTGGATCCA#(((((((((((((((..#)))))))))))..)))).	1275	1293	1	-23.7	1	0.000337066	0.529	2.65876	3.45561	-4.17062	15	18	11	CDS		0	0
hsa-miR-4534	NM_001346897	EGFR	GGATGGAGGAGGGGTCT#GGAATCCCTGCCAGCGAGATCTCCTCCATCCT#(((((((((((..((((#.))))))))))))))).	2874	2906	1	-24.1	1	0.000342525	0.426	4.68647	5.12009	-8.57351	15	17	15	CDS		0	0
hsa-miR-378i	NM_001346897	EGFR	ACTGGACTAGGAGTCAGAAGG#CCACAACCACCGCGCACGGCCCCCTGACTCCGTCCAGTA#(((((((..((((((((..((#.))..))))))))))))))).	182	221	0.846154	-26.6	1	0.0102711	0.338	-0.571454	-0.326661	-7.3076	17	21	15	5UTR		0	0
hsa-miR-4535	NM_001346897	EGFR	GTGGACCTGGCTGGGAC#CCACAGGCCAGGTCTGCC#(((((((((((((((..#)).))).)))))))))).	1627	1645	0.846154	-24.1	1	4.33e-05	0.353	1.18028	2.70111	-4.17062	15	18	10	CDS		0	0
hsa-miR-4535	NM_001346897	EGFR	GTGGACCTGGCTGGGAC#CTGGGCCAGGTCTT#..((((((((((.((..#)).)))))))))).	2011	2025	0.980769	-22.8	1	2.47e-05	0.456	4.60264	2.31585	-6.47918	12	14	10	CDS		0	0
hsa-miR-4536-5p	NM_001346897	EGFR	TGTGGTAGATATATGCACGAT#CGGGAGAGCGACTGCCTGGTCTGCCGCAA#((((((((((....(((....#.)))...)))))))))).	855	884	0.846154	-18	1	6.83e-05	0.353	4.66184	4.30625	-12.2551	13	18	10	CDS		0	0
hsa-miR-4538	NM_001346897	EGFR	GAGCTTGGATGAGCTGGGCTGA#TCTGCCCGGCGAGTCGGGCTCT#((((((.(((..(((((((.((#)).)))))))..))))))))).	313	335	0.846154	-27.7	0	5.92e-06	0.353	-0.681133	1.32127	-11.6528	18	22	9	CDS		0	0
hsa-miR-4539	NM_001346897	EGFR	GCTGAACTGGGCTGAGCTGGGC#CGCAGCTCATGCCCTTCGGCT#((((((..(((((((((((.(.#).))))))).)))))))))).	2494	2515	0.923077	-29.1	0	9.01e-05	0.397	5.64173	4.81892	-7.7949	18	21	10	CDS		0	0
hsa-miR-4539	NM_001346897	EGFR	GCTGAACTGGGCTGAGCTGGGC#GCTGGGCTCCGGTGCGTTCGGCA#(((((((.(.((((((((.(((#))).))))).))).)))))))).	2276	2299	0.846154	-28.4	1	1.08e-07	0.471	6.127	5.46191	-7.49372	19	23	8	CDS		0	0
hsa-miR-4540	NM_001346897	EGFR	TTAGTCCTGCCTGTAGGTTTA#AGACCTGCCCGGCAGGAGTC#..(.(((((((.((((((((.#))))))))..))))))).).	1903	1923	0.846154	-24.1	0	7.17e-06	0.382	2.91204	3.24254	-11.3358	16	20	8	CDS		0	0
hsa-miR-4540	NM_001346897	EGFR	TTAGTCCTGCCTGTAGGTTTA#GAACCTAGAAATCATACGCGGCAGGACC#...(((((((((((((((((.#.))))).)))).)))))))).	1388	1416	0.846154	-22.5	0	4.73e-05	0.529	4.69037	3.1645	-6.51454	17	21	8	CDS		0	0
hsa-miR-4540	NM_001346897	EGFR	TTAGTCCTGCCTGTAGGTTTA#AGGCCACAGGCCAGGTCTGC#.(((.(((((((((.(((((.#))))))))))).))).))).	1624	1644	0.846154	-22	0	3.96e-05	0.368	-0.404782	2.5443	-8.64781	17	20	11	CDS		0	0
hsa-miR-3960	NM_001346897	EGFR	GGCGGCGGCGGAGGCGGGGG#TCCCCGCCTCGCCGCCAACGCCA#(((((((((.((((((((((#))))))))))))))))...))).	162	185	0.846154	-40	1	0.00190628	0.221	-0.489114	-0.151967	-5.18008	19	23	16	5UTR		0	0
hsa-miR-3972	NM_001346897	EGFR	CTGCCAGCCCCGTTCCAGGGCA#GCCACTGGGATGGTGGGGGCCCTCCTCTTGCTGCTGGTGGT#(((((((((((((((((((((.#))).))))))))).).................)))))))).	2064	2105	0.923077	-30	1	0.000115396	0.338	2.79207	2.40778	-3.93757	21	41	9	CDS		0	0
hsa-miR-3972	NM_001346897	EGFR	CTGCCAGCCCCGTTCCAGGGCA#GCCCGGAGCCCAGGGACTGCGTCTCTTGCCGGAATGTCAGCCGAGGCAGG#((((((((((.(((((.((((.#)))))))))...))).))..........................))))).	1675	1725	1	-26.8	1	1.22e-05	0.412	2.59734	3.55097	-6.76235	19	50	9	CDS		0	0
hsa-miR-3972	NM_001346897	EGFR	CTGCCAGCCCCGTTCCAGGGCA#GCCCTGGGGATCGGCCTCTTCATGCGAAGGCGCCACATCGTTCGGAAGCGCACGCTGCGGAGGCTGCTGCAGG#(((((((((((((((((((((.#)))))))..................)..............................)))).)))))..)))).	2106	2179	0.815385	-26.7	1	9.93e-07	0.368	2.95342	4.05399	-3.93757	21	73	7	CDS		0	0
hsa-miR-3976	NM_001346897	EGFR	TATAGAGAGCAGGAAGATTAATGT#ACAGATTTGATCCCTGTTCTCTC#...((((((((((..((((((...#.)))))))))))))))).	3741	3764	0.923077	-19.7	0	0.0543081	0.559	-0.615924	-0.252276	-8.10683	16	18	16	3UTR		0	0
hsa-miR-3978	NM_001346897	EGFR	GTGGAAAGCATGCATCCAGGGTGT#ACACCCTGGTCTGGAAGTACGCAGACGCCGGCCATGTGTGCCACC#((((...((((((..(((((((((#))))))))).....................)).))))...)))).	1936	1981	1	-25.9	0	0.000256293	0.397	1.92324	3.07122	-13.0935	19	45	9	CDS		0	0
hsa-miR-3978	NM_001346897	EGFR	GTGGAAAGCATGCATCCAGGGTGT#GCACCTACGGATGCACTGGGCCAGGTCTTGAAGGCTGTCCAA#.((((.(((.(((((((.((((((#))))))..)))))))..................))).)))).	1996	2038	0.846154	-23.8	0	0.000369959	0.397	2.93648	2.2067	-6.93679	20	42	7	CDS		0	0
hsa-miR-4633-5p	NM_001346897	EGFR	ATATGCCTGGCTAGCTCCTC#GGGAGCTGCTGGGG#.....((((((.(((((((.#))))))))))))).	714	728	0.846154	-21.2	0	0.000264005	0.456	2.56781	3.09653	-17.0124	13	14	13	CDS		0	0
hsa-miR-4633-3p	NM_001346897	EGFR	AGGAGCTAGCCAGGCATATGCA#TGTATGTGTGTGTTTGTGACAGATTTGATCCCTGTTCTCTCTGCTGGCTCTA#.(((((((((((.(((((((((#))))))))).))..............................))))))))).	3723	3775	0.846154	-24.9	1	0.00517634	0.603	-0.167535	-0.250085	-5.08246	20	52	9	3UTR		0	0
hsa-miR-4633-3p	NM_001346897	EGFR	AGGAGCTAGCCAGGCATATGCA#GTGCCTGGTGAGTGGCTTGTCTGGAAACAGTCCTGCTCCTC#((((((..(((((((((.....#))))))))).........................)))))).	3390	3431	0.923077	-23.5	0	0.00788559	0.397	2.93301	0.725154	-7.7949	15	41	9	CDS		0	0
hsa-miR-4634	NM_001346897	EGFR	CGGCGCGACCGGCCCGGGG#CCCCGGGAGAGCGACTGCCTGGTCTGCCGC#(((((.(((((((((((((#)))))))...........))))))))))).	852	882	0.846154	-30.4	0	3.89e-05	0.353	4.11696	3.83057	-5.83853	18	30	11	CDS		0	0
hsa-miR-4634	NM_001346897	EGFR	CGGCGCGACCGGCCCGGGG#CCCCGGCGGCCGCCGCCGC#(((((((.(((..((((((#))))))))).))).)))).	102	121	0.923077	-27.8	1	1.02e-09	0.191	0.496734	-0.374506	-10.8871	16	19	9	5UTR		0	0
hsa-miR-4638-3p	NM_001346897	EGFR	CCTGGACACCGCTCAGCCGGCCG#GGCTGCTGGGGCCCGGAGCCCAGGG#(((((.(.((((((((.(((((.#))))))))))...))).).))))).	1665	1690	0.846154	-28.4	0	1.64e-06	0.294	5.83446	2.33239	-8.15217	19	25	10	CDS		0	0
hsa-miR-4638-3p	NM_001346897	EGFR	CCTGGACACCGCTCAGCCGGCCG#GCCTGGTGAGTGGCTTGTCTGGA#.((((((((((((((.(.(((..#))).).)))))))..))))))).	3392	3415	0.807692	-26.9	1	2.77e-07	0.412	1.48985	0.562479	-4.02637	18	23	7	CDS		0	0
hsa-miR-4638-3p	NM_001346897	EGFR	CCTGGACACCGCTCAGCCGGCCG#GGCCCTCCTCTTGCTGCTGGTGGTGGCCCTGGGG#(((((.((((((.((((.((((.#))))...........))))))))))..)).))).	2081	2115	0.923077	-27	0	9.37e-06	0.324	2.15964	2.90977	-7.12766	19	34	10	CDS		0	0
hsa-miR-4639-5p	NM_001346897	EGFR	TTGCTAAGTAGGCTGAGATTGA#CAGTCGTCAGCCTGAACATAACATCCTTGGGAT#.(.((((((((((((((((((.#))))).))))))))...........))))).).	1441	1474	0.846154	-20.5	0	0.00287192	0.515	1.74399	4.25337	-5.35086	19	33	8	CDS		0	0
hsa-miR-4639-3p	NM_001346897	EGFR	TCACTCTCACCTTGCTTTGC#GCGTCTCTTGCCGGAATGTCAGCCGAGGCAGGGAATGCGTGGACAAGTGCAACCTTCTGGAGGGTGAG#((((((((.((((((((((.#.))))))))))..........................)))))))).	1693	1761	0.846154	-22	1	8.13e-05	0.456	4.01841	3.15543	-4.99396	18	46	10	CDS		0	0
hsa-miR-4640-5p	NM_001346897	EGFR	TGGGCCAGGGAGCAGCTGGTGGG#CTGCTGGCTGCGCTCTGCCCGG#((((.(((((.(((((((((((.#))))))))))).))))))))).	300	322	0.923077	-32.2	0	1.31e-05	0.324	0.180123	0.822537	-10.8814	20	22	11	CDS		0	0
hsa-miR-4640-5p	NM_001346897	EGFR	TGGGCCAGGGAGCAGCTGGTGGG#CCCCCGAGGGCTGCTGGGGCCCGGAGCCCAG#((((((.((((((((((((.(((#)))))...)))))))....))).).))))).	1657	1688	1	-30.7	0	2.95e-07	0.294	5.25356	1.89974	-5.48126	21	31	7	CDS		0	0
hsa-miR-4640-3p	NM_001346897	EGFR	CACCCCCTGTTTCCTGGCCCAC#GGGCCCGGAGCCCAGGGA#....(((((.((((.(((((..#))))).))))..))))).	1673	1691	0.846154	-26	0	4.56e-06	0.279	7.90347	1.98866	-11.5245	14	18	5	CDS		0	0
hsa-miR-4641	NM_001346897	EGFR	TGCCCATGCCATACTTTTGCCTCA#GAGGCAAAGTGCCTATCAAGTGGATGGCATTGGA#..((.((((((((((((((((((.#))))))))..........)))..))))))).)).	2743	2777	1	-23.8	0	0.000299528	0.574	6.82095	5.23002	-9.07604	20	34	8	CDS		0	0
hsa-miR-4641	NM_001346897	EGFR	TGCCCATGCCATACTTTTGCCTCA#GGGCCAAAAGTGTGATCCAAGCTGTCCCAATGGGAGCTGCTGGGGTG#.((((..(((((((((((((((..#)))).)))))))))........................))..)))).	683	730	1	-21.6	0	7.91e-06	0.426	3.04281	2.82577	-7.23797	19	47	9	CDS		0	0
hsa-miR-4641	NM_001346897	EGFR	TGCCCATGCCATACTTTTGCCTCA#GGCAGGAGTCATGGGA#..((((((....(((((((((...#))))))))))))))).	1913	1929	0.923077	-21.7	1	1.88e-06	0.397	1.93672	3.11064	-13.4275	15	16	15	CDS		0	0
hsa-miR-4642	NM_001346897	EGFR	ATGGCATCGTCCCCTGGTGGCT#GCTACCTTGTCATTCAGGGGGATGAAAGAATGCATTTGCCAA#.((((((((((((((((((((.#))))))..........)))))))))...........))))).	3055	3097	0.846154	-28.5	1	0.0432784	0.515	5.43557	4.29388	-3.79332	20	42	9	CDS		0	0
hsa-miR-4645-3p	NM_001346897	EGFR	AGACAGTAGTTCTTGCCTGGTT#GGCCAGGTCTTGAAGGCTGTCC#.((((((..(((..((((((((#))))))).)..))).)))))).	2014	2036	0.846154	-22.2	1	0.000319023	0.412	4.64729	2.29541	-9.30932	17	22	7	CDS		0	0
hsa-miR-4646-5p	NM_001346897	EGFR	ACTGGGAAGAGGAGCTGAGGGA#TCCTCAACCTCCTCGACCCAC#..((((..((((((.((((((.#))))))..))))))..)))).	3426	3447	1	-26	0	0.263035	0.412	-0.858474	0.828907	-9.54977	16	21	6	CDS		0	0
hsa-miR-4646-3p	NM_001346897	EGFR	ATTGTCCCTCTCCCTTCCCAG#CTGCGGAGGCTGCTGCAGGAGAGGGAG#....(((((((((((((((((#))).)))))........))))))))).	2160	2187	0.923077	-24.9	0	0.000150553	0.353	3.60534	3.8394	-9.54656	17	27	9	CDS		0	0
hsa-miR-4646-3p	NM_001346897	EGFR	ATTGTCCCTCTCCCTTCCCAG#CTGGGGTGCAGGAGAGGAGAA#....(((((((((..((((((#))))))....))))))).)).	722	743	0.923077	-22.7	0	0.00156977	0.456	1.62839	3.36326	-11.1389	15	21	7	CDS		0	0
hsa-miR-4647	NM_001346897	EGFR	GAAGATGGTGCTGTGCTGAGGAA#CCTCAGCCACCCATATGTACCATCG#...((((((((((.(((((((..#))))))))).......)))))))).	2925	2950	0.923077	-24.9	0	0.105639	0.485	5.47841	5.73138	-7.37138	17	25	9	CDS		0	0
hsa-miR-4648	NM_001346897	EGFR	TGTGGGACTGCAAATGGGAG#TGCATTTGCCAAGTCCTACAG#((((((((((((((((.(..#).)))))))..))))))))).	3085	3106	0.884615	-22.5	1	0.0105791	0.515	4.27741	4.86673	-3.93757	17	21	9	CDS		0	0
hsa-miR-4648	NM_001346897	EGFR	TGTGGGACTGCAAATGGGAG#CTCCCAGTGCCTGGTGAGTGGCTTGTCTGGAAACAGTCCTGCT#.(((((((((((..((((((#)))))).)))........................)))))))).	3384	3427	0.846154	-21.2	1	0.00186347	0.412	1.05727	0.758458	-5.9393	17	43	8	CDS		0	0
hsa-miR-4649-5p	NM_001346897	EGFR	TGGGCGAGGGGTGGGCTCTCAGAG#CTCTGAGTGCATACAGTGCCACCCAGAGTGCCTG#.(((((..((((((((.(((((((#))))))).))........))))))....))))).	1781	1815	0.884615	-30.3	0	3.34e-05	0.426	3.44806	3.09914	-7.65065	20	34	7	CDS		0	0
hsa-miR-4649-5p	NM_001346897	EGFR	TGGGCGAGGGGTGGGCTCTCAGAG#GAGTCCCCGCCTCGCCG#..(((((((((.((((((......#)))))))).))))))).	159	176	1	-29.7	1	0.00332813	0.206	-0.239871	-0.155305	-8.3038	15	17	8	5UTR		0	0
hsa-miR-4649-5p	NM_001346897	EGFR	TGGGCGAGGGGTGGGCTCTCAGAG#TCGCCACTGGGATGGTGGGGGCCCTCCTCTTGCTG#..(((((((((.(((((((((...#.))))))))).))))))))).	2062	2097	0.923077	-33.1	1	0.0117312	0.324	3.27533	2.0396	-8.3038	18	21	9	CDS		0	0
hsa-miR-4650-3p	NM_001346897	EGFR	AGGTAGAATGAGGCCTGACAT#CAGGCCAGGTCTGCCA#.((((((....((((((....#))))))...)))))).	1630	1646	0.923077	-21.4	1	5.41e-05	0.353	-0.811662	2.49241	-11.2306	12	16	6	CDS		0	0
hsa-miR-4651	NM_001346897	EGFR	CGGGGTGGGTGAGGTCGGGC#GCCTCCCTCAGCCACCCA#..((((((.(((((..((((#)))).))))).)))))).	2920	2938	0.846154	-28.6	1	0.134149	0.485	5.33648	5.8174	-6.98189	15	18	6	CDS		0	1
hsa-miR-4652-5p	NM_001346897	EGFR	AGGGGACTGGTTAATAGAACTA#AGTCCTGCTCCTCAACCTCCTCGACCCACTCAGCAGCAGCCAGTCTCCA#.(((((((((((..........#.))))))))))).	3418	3467	0.923077	-19.8	1	0.0126358	0.382	-0.995102	0.97365	-6.90779	11	13	11	CDS		0	0
hsa-miR-4652-3p	NM_001346897	EGFR	GTTCTGTTAACCCATCCCCTCA#GAGGGGGAAACAGTGGCAGAT#..(((((((.....(((((((.#)))))))......))))))).	3501	3522	0.846154	-20.6	1	0.00254444	0.426	-0.321712	-0.598496	-14.5171	14	21	7	CDS		0	0
hsa-miR-4655-5p	NM_001346897	EGFR	CACCGGGGATGGCAGAGGGTCG#GGCCAGGTCTGCCATGCCTTGTGC#(((.(((.((((((((.((((.#))))...)))))))).))).))).	1632	1656	0.846154	-28.7	0	0.000722091	0.279	3.27356	2.75482	-9.28323	18	24	8	CDS		0	0
hsa-miR-4655-3p	NM_001346897	EGFR	ACCCTCGTCAGGTCCCCGGGG#CCCTGGGGATCGGCCTCTTCATGCGAAGGC#.((.((((..(((((((((((#)))))))))))...........)))).)).	2107	2137	0.846154	-26.2	0	3.82e-05	0.324	2.10417	3.00334	-9.12424	17	30	11	CDS		0	0
hsa-miR-4655-3p	NM_001346897	EGFR	ACCCTCGTCAGGTCCCCGGGG#CCCCGAGGGCTGCTGGGGCCCGGAGCCCAGGGA#.((((..((.(((((((((((#))))).........))))))..))....)))).	1658	1691	0.846154	-24.8	0	4.56e-06	0.279	5.0028	1.86647	-8.48048	17	33	6	CDS		0	0
hsa-miR-4655-3p	NM_001346897	EGFR	ACCCTCGTCAGGTCCCCGGGG#CCTGTGGGGCCGACAGCTATGAGATGGAGGA#..(((((((.((((((((((.#)))).)))))))))............)))).	1054	1085	0.846154	-24.8	1	0.0417522	0.382	2.81388	4.62931	-6.19951	17	31	9	CDS		0	0
hsa-miR-4656	NM_001346897	EGFR	TGGGCTGAGGGCAGGAGGCCTGT#ACAGGCCACCTCGTCGGCGTCCGCCCGA#(((((.((.(.((((.(((((((#))))))).)))....).).)).))))).	133	161	0.923077	-29.5	0	1.02e-07	0.25	-0.197906	-0.166432	-9.95275	19	28	7	5UTR		0	0
hsa-miR-4656	NM_001346897	EGFR	TGGGCTGAGGGCAGGAGGCCTGT#GCAGGGCTTCTTCAGCAGCCCC#.((((((..((.(((((.(((((#))))).)))))))..)))))).	3185	3207	0.846154	-29.4	1	0.00802133	0.368	3.96577	3.66584	-10.5102	18	22	7	CDS		0	0
hsa-miR-4656	NM_001346897	EGFR	TGGGCTGAGGGCAGGAGGCCTGT#ACAGTGCCACCCAGAGTGCCTGCCTCAGGCCAT#(((.((((.((((((.(((((((#)))).)))..........)))))))))).))).	1793	1826	0.923077	-29.3	0	1.01e-05	0.382	3.13424	3.12082	-8.25904	20	33	10	CDS		0	0
hsa-miR-4657	NM_001346897	EGFR	AATGTGGAAGTGGTCTGAGGCAT#TGCCTCAGGCCATGAACATC#.((((....(((((((((((((.#)))))))))))))..)))).	1813	1833	0.846154	-27.3	0	0.00145552	0.382	1.76696	3.0799	-10.608	17	20	13	CDS		0	0
hsa-miR-4658	NM_001346897	EGFR	GTGAGTGTGGATCCTGGAGGAAT#TCCTTCACACATACTCCTCCTCTGGATCCACAGGAACT#((...(((((((((.((((((..#.))))))...)))))))))...)).	1263	1301	1	-28.5	0	0.000172761	0.559	1.76739	3.26997	-13.3816	17	25	9	CDS		0	0
hsa-miR-4659a-3p	NM_001346897	EGFR	TTTCTTCTTAGACATGGCAACG#GCTATGAGATGGAGGAAGA#((((((((....((((((....#))))))....)))))))).	1069	1088	0.846154	-16.3	1	0.0724849	0.397	5.2565	4.08237	-12.408	14	19	8	CDS		0	1
hsa-miR-4660	NM_001346897	EGFR	TGCAGCTCTGGTGGAAAATGGAG#TCCAAGCTGTCCCAATGGGAGCTGCT#.((((((((.(((((...((((.#)))).....)))..)).)))))))).	698	724	0.923077	-23.2	1	8.73e-07	0.441	4.24261	3.16126	-5.26888	17	26	8	CDS		0	0
hsa-miR-4660	NM_001346897	EGFR	TGCAGCTCTGGTGGAAAATGGAG#CCAGCAACAATTCCACCGTGGCTTGCATTGATAGAAATGGGCTGCAA#((((((((((((((((..(((..#))).......))))))))....................)))))))).	3247	3294	0.846154	-23	1	0.0125963	0.529	1.78304	3.08346	-3.93757	19	47	8	CDS		0	0
hsa-miR-4661-5p	NM_001346897	EGFR	AACTAGCTCTGTGGATCCTGAC#TCACACATACTCCTCCTCTGGATCCACAGGAACTGGA#..((((.(((((((((((.((.#.)).)))))))))))..)))).	1267	1304	1	-23.9	0	0.000200232	0.559	1.6608	3.1564	-6.50069	17	22	11	CDS		0	0
hsa-miR-4661-5p	NM_001346897	EGFR	AACTAGCTCTGTGGATCCTGAC#CGGAGTCCCGAGCTAGC#..(((((((.(.((((.(((..#))).)))))))))))).	86	103	0.923077	-19	1	0.00107712	0.147	-0.541252	-0.244321	-9.54631	15	17	12	5UTR		0	0
hsa-miR-4661-3p	NM_001346897	EGFR	CAGGATCCACAGAGCTAGTCCA#TGGGCTGGCCAAACTGCTGGGTGCG#..(.((((((((.(((((((((#)))))))))....))).))))).).	2693	2718	0.923077	-23.3	0	0.000453417	0.5	5.66623	5.1923	-9.27815	18	25	9	CDS		0	0
hsa-miR-4661-3p	NM_001346897	EGFR	CAGGATCCACAGAGCTAGTCCA#TGGAGAAGCTCCCAACCAAGCTCTCTTGAGGATCTTGA#((((((((.(((((((..((((#))))..)))))...............)).)))))))).	2210	2248	0.846154	-22.6	1	9.95e-05	0.574	5.04125	5.25007	-4.99396	19	38	8	CDS		0	0
hsa-miR-4659b-3p	NM_001346897	EGFR	TTTCTTCTTAGACATGGCAGCT#AGCTGCTGGGGTGCAGGAGAGGAGAA#(((((((((...((((((((((#)))))))...)))...))))))))).	717	743	0.923077	-21.1	1	0.00156977	0.456	4.49761	3.40149	-11.3517	19	26	9	CDS		0	1
hsa-miR-4659b-3p	NM_001346897	EGFR	TTTCTTCTTAGACATGGCAGCT#AGCTGTCCCATCAAGGAAGAC#..(((((((.((...(((((((#)))))))...)).))))))).	3294	3315	0.846154	-18.3	1	0.000304009	0.485	1.05435	2.78997	-9.08093	16	21	7	CDS		0	1
hsa-miR-4664-3p	NM_001346897	EGFR	CTTCCGGTCTGTGAGCCCCGTC#TGGGGCCCGGAGCCCAGGGACTGCGTCTCTTGCCGGAAT#.(((((((((.((.((((((..#)))))).)).))...................))))))).	1671	1710	0.846154	-23.6	1	0.000773539	0.338	2.61964	2.86924	-7.47494	17	39	7	CDS		0	0
hsa-miR-4665-5p	NM_001346897	EGFR	CTGGGGGACGCGTGAGCGCGAGC#GCGCTGCCGTGGCAAGTCCCCCAGT#((((((((((((..(((((....#)))))..))).....))))))))).	788	813	0.923077	-31.6	1	9.33e-05	0.324	2.69754	4.471	-6.08354	17	25	9	CDS		0	1
hsa-miR-4665-3p	NM_001346897	EGFR	CTCGGCCGCGGCGCGTAGCCCCCGCC#GGTGGGGGCCCTCCTCTTGCTGCTGGTGGTGGCCCTGGGG#(((((((((.((..((((((((((((#)))))))))...........)))..)).))))))..))).	2075	2115	0.846154	-37.8	1	9.37e-06	0.324	2.63481	2.00493	-7.32605	23	40	9	CDS		0	0
hsa-miR-4665-3p	NM_001346897	EGFR	CTCGGCCGCGGCGCGTAGCCCCCGCC#GGCCGGGGCAGCGCTCCTGGCGCTGCTGGCTGCGCTCTGCCCGGCGAGTCGGGC#((((((((((((((((((((((((((#))).))))....................)))))))...)))..))).)))))).	278	332	0.846154	-36.6	1	2.13e-08	0.353	-0.347865	1.40647	-3.93757	26	54	7	CDS		0	0
hsa-miR-4667-5p	NM_001346897	EGFR	ACTGGGGAGCAGAAGGAGAACC#GGTCTGCCATGCCTTGTGCTCCCCC#...((((((((.((((......#.)))).)))))))).	1637	1662	0.923077	-24.9	0	5.31e-05	0.279	1.22274	2.52765	-9.86134	12	15	8	CDS		0	0
hsa-miR-4667-5p	NM_001346897	EGFR	ACTGGGGAGCAGAAGGAGAACC#GGTGCTCCCTCCAGCATCTCCAGA#.(((((((((.((.((((.(((#))).)))).))..)).))))))).	3479	3503	0.923077	-23.2	1	2.17e-05	0.412	-1.39474	-0.567787	-7.47494	18	24	7	CDS		0	0
hsa-miR-4667-3p	NM_001346897	EGFR	TCCCTCCTTCTGTCCCCACAG#CTGCTGGGGTGCAGGAGAGGAGAA#(((((.(((((((((((((((#))).))))).)))))))))).)).	719	743	1	-26	0	0.00156977	0.456	4.08249	3.6482	-5.83853	20	24	10	CDS		0	0
hsa-miR-4667-3p	NM_001346897	EGFR	TCCCTCCTTCTGTCCCCACAG#CTGCTGGGTGCGGAAGAGAAAGAATACCATGCAGAAGGAGGC#..(((((((((((((((((((#))).)))).)....................))))))))))).	2706	2748	0.923077	-24.4	1	0.00011242	0.5	4.87817	5.52248	-4.957	19	42	11	CDS		0	0
hsa-miR-4667-3p	NM_001346897	EGFR	TCCCTCCTTCTGTCCCCACAG#CTGCGGAGGCTGCTGCAGGAGAGGGAG#(((((.(((((((((((.(((#))).)).)).....)))))))))))).	2160	2187	0.846154	-23.7	0	0.000150553	0.353	4.29577	4.00007	-5.83853	19	27	12	CDS		0	0
hsa-miR-219b-5p	NM_001346897	EGFR	AGATGTCCAGCCACAATTCTCG#AGGAGGTGGCTGGTTATGTCC#.(((((((((((((..((((..#)))).))))))))..))))).	508	529	1	-19.6	1	0.000879982	0.5	4.66889	3.09482	-4.76182	17	21	8	CDS		0	0
hsa-miR-219b-5p	NM_001346897	EGFR	AGATGTCCAGCCACAATTCTCG#GCTGGGCATCTG#(((((((((((...........#))))))))))).	2456	2468	0.923077	-19.5	1	2.83e-05	0.324	5.87583	5.29295	-10.3988	11	12	11	CDS		0	0
hsa-miR-4669	NM_001346897	EGFR	TGTGTCCGGGAAGTGGAGGAGG#TCTCCTCCATCCTGGAGAA#..(.(((((((..(((((((((#)))))))))))))))).).	2893	2912	0.961538	-26.7	0	1.04e-05	0.412	2.67272	5.39403	-12.625	17	19	16	CDS		0	0
hsa-miR-4670-3p	NM_001346897	EGFR	TGAAGTTACATCATGGTCGCTT#AAGTGATGGAGATGTGATAATTTCAG#((((((((((((.(.(((((((#))))))).).))))))))...)))).	1493	1519	0.923077	-19.2	1	0.00642625	0.647	2.85616	2.81151	-5.96215	20	26	8	CDS		0	0
hsa-miR-4671-5p	NM_001346897	EGFR	ACCGAAGACTGTGCGCTAATCT#AGAGCCGGAGCGAGCTCTTCGGG#.(((((((..((.((((.....#.)))).))))))))).	230	253	0.846154	-17.7	1	0.000195314	0.324	-0.541251	-0.143066	-7.38135	13	16	9	5UTR		0	0
hsa-miR-4673	NM_001346897	EGFR	TCCAGGCAGGAGCCGGACTGGA#CCAGTGTGCTGCAGGCTGCACAGGCCCCCGGGAGAGCGACTGCCTGGT#.((((((((..(((...((((.#.))))..).))..)))))))).	827	875	0.846154	-27.6	1	1.13e-05	0.338	5.40426	3.97457	-8.8291	15	22	8	CDS		0	0
hsa-miR-4674	NM_001346897	EGFR	CTGGGCTCGGGACGCGCGGCT#GGCTCGTGCGTCCGAGCCTG#..((((((.((((((((((((#))).))))))))))))))).	1038	1058	0.846154	-32.6	1	1.04e-06	0.412	4.09041	4.1639	-6.01339	18	20	15	CDS		0	0
hsa-miR-4675	NM_001346897	EGFR	GGGGCTGTGATTGACCAGCAGG#CCTGCTGGGCATCTGCCTCACCTCCACCGTGCAGCTCATCACGCAGCTCA#.((((((((..(((((((((((#))))))))...........................)))...)))))))).	2453	2503	0.846154	-25.8	1	0.00139238	0.382	5.05249	5.29459	-7.86061	19	50	8	CDS		0	0
hsa-miR-4676-5p	NM_001346897	EGFR	GAGCCAGTGGTGAGACAGTGA#TCCCTGTTCTCTCTGCTGGCTCT#((((((((((.(((((((.((#)).)))).))).)))))))))).	3751	3774	1	-27.7	1	0.00231297	0.603	0.17271	-0.160268	-6.76235	19	23	10	3UTR		0	0
hsa-miR-4676-3p	NM_001346897	EGFR	CACTGTTTCACCACTGGCTCTT#AGCCAGGTGCTCCCTCCAGCATCTCCAGAGGGGGAAACAGTGG#(((((((((.((.((((.....#.))))..)).))))))))).	3474	3517	1	-21.8	1	0.000280332	0.441	-0.733229	-0.51627	-6.46921	15	20	9	CDS		0	0
hsa-miR-4677-5p	NM_001346897	EGFR	TTGTTCTTTGGTCTTTCAGCCA#TGAAGGGCGTAAGGAGCAGA#((((((((((((((((((....#)))))))).)))))))))).	3534	3554	0.846154	-19.7	1	0.0191285	0.471	-0.356735	-0.935302	-3.93757	18	20	10	CDS		0	0
hsa-miR-4680-5p	NM_001346897	EGFR	AGAACTCTTGCAGTCTTAGATGT#GCGTCAAGACCTGCCCGGCAGGAGTC#...((((((((.(((((.(((((#)))))))))).......)))))))).	1897	1923	0.846154	-18.8	0	7.17e-06	0.382	1.21407	3.12883	-9.86134	18	26	10	CDS		0	0
hsa-miR-4681	NM_001346897	EGFR	AACGGGAATGCAGGCTGTATCT#GGTGCCACCTGCGTGAAGAAGTGTCCCCGTA#.(((((.(((((((..(((((.#)))))..)))))))...........))))).	987	1018	0.846154	-21.3	0	0.0199513	0.456	5.18261	4.69203	-6.30551	17	31	7	CDS		0	0
hsa-miR-4682	NM_001346897	EGFR	TCTGAGTTCCTGGAGCCTGGTCT#GGGCCCGGAGCCCAGGGACTGCGTCTCTTGCCGGAA#(((((((((((((.(((((((((#))))).)).)))))))))))...........)))).	1673	1709	1	-25.5	1	0.000881283	0.324	2.85246	3.10621	-4.79441	22	36	11	CDS		0	0
hsa-miR-4684-5p	NM_001346897	EGFR	CTCTCTACTGACTTGCAACATA#GGGAGTTTGTGGAGAA#.(((((((.(((((.(......#).))))).))))))).	1765	1781	0.876923	-17.5	1	0.00594951	0.456	1.69769	3.36909	-5.58516	13	16	7	CDS		0	0
hsa-miR-4684-3p	NM_001346897	EGFR	TGTTGCAAGTCGGTGGAGACGT#ACGTGTGCCGCCTGCTGGGCATCTGCCTCACCTCCACCGTGCAGCT#.((((((...((((((((....#.)))))))))))))).	2443	2489	0.846154	-23.4	1	0.00336436	0.324	4.90679	5.67804	-8.40586	14	16	14	CDS		0	0
hsa-miR-4684-3p	NM_001346897	EGFR	TGTTGCAAGTCGGTGGAGACGT#TTCCACCGTGGCTTGCAT#...(((((((((((((((....#))))))))..))))))).	3257	3275	0.923077	-22.6	0	7.09e-05	0.5	1.53657	2.6582	-6.51454	15	18	8	CDS		0	0
hsa-miR-4685-5p	NM_001346897	EGFR	CCCAGGGCTTGGAGTGGGGCAAGGTT#GCTCTGCCCGGCGAGTCGGGCTCTGGA#.(((((((((((.((.(((((.(((.#))).))))).))...))))))))))).	311	338	0.846154	-32.7	1	2.88e-05	0.382	-0.264957	1.34133	-5.3155	21	27	11	CDS		0	0
hsa-miR-4685-5p	NM_001346897	EGFR	CCCAGGGCTTGGAGTGGGGCAAGGTT#GCCATGCCTTGTGCTCCCCCGAGGGCTGCTGGGGCCCGGAGCCCAGGGA#(((.(((((((((((((((((.(((.#))).))))))..))))).....................)))))).))).	1642	1691	0.846154	-32	0	4.56e-06	0.279	3.67387	1.85966	-6.9696	23	49	6	CDS		0	0
hsa-miR-4685-5p	NM_001346897	EGFR	CCCAGGGCTTGGAGTGGGGCAAGGTT#GCCCTCCTCTTGCTGCTGGTGGTGGCCCTGGGG#(((((((((.((((.(((((......#))))).)))).............))))))))).	2082	2115	1	-32	1	9.37e-06	0.324	2.0302	2.99705	-5.91553	18	33	9	CDS		0	0
hsa-miR-4685-3p	NM_001346897	EGFR	TCTCCCTTCCTGCCCTGGCTAG#CTGCCCGGCAGGAGTCATGGGAGAA#((((((((((((((..(((.((#))))).))))))))....)))))).	1907	1932	0.923077	-27.6	1	2.78e-05	0.426	2.94068	3.17583	-4.90607	19	25	8	CDS		0	0
hsa-miR-4686	NM_001346897	EGFR	TATCTGCTGGGCTTTCTGGTGTT#GCCGGAATGTCAGCCGAGGCAGGG#..((((((.(((((((((((...#)))))))....))))..)))))).	1702	1726	0.846154	-22.3	1	1.4e-05	0.397	2.60089	3.73038	-6.01339	17	24	7	CDS		0	0
hsa-miR-4687-5p	NM_001346897	EGFR	CAGCCCTCCTCCCGCACCCAAA#GGGAATGCGTGGACAAGTGCAACCTTCTGGAGGGTG#..(((((((((((((((((...#)))..)))).)))...............))))))).	1723	1759	0.807692	-25	1	0.000124759	0.441	3.55926	2.91396	-4.957	17	36	7	CDS		0	0
hsa-miR-4687-3p	NM_001346897	EGFR	TGGCTGTTGGAGGGGGCAGGC#TGCTCCCTCCAGCATCTCCAG#(((.((((((((((((((...#))))))))))))))...))).	3481	3502	0.846154	-29.7	0	2.45e-05	0.426	-1.21469	-0.590141	-6.9696	17	21	14	CDS		0	0
hsa-miR-4687-3p	NM_001346897	EGFR	TGGCTGTTGGAGGGGGCAGGC#CCTGCTCCTCAACCTCCTCGACCCACTCAGCAGCAGCCAG#((((((((((((((((((((.#)))))))).................)))..))))))))).	3421	3461	1	-28.8	1	0.0165894	0.368	-0.62988	0.775109	-3.93757	20	40	9	CDS		0	0
hsa-miR-1343-5p	NM_001346897	EGFR	TGGGGAGCGGCCCCCGGGTGGG#TCCCCCGAGGGCTGCTGGGGCCCGGA#(.(((((((((((.((((.(((#))))))).))))))))....))).).	1656	1682	0.846154	-31.6	1	7.73e-09	0.294	6.39845	1.91687	-5.95809	19	26	8	CDS		0	0
hsa-miR-1343-3p	NM_001346897	EGFR	CTCCTGGGGCCCGCACTCTCGC#GCTGTCCCAATGGGAGCTGCTGGGGTGCAGGAGA#((((((.(.((((((((((((.#.)))))).))).))).).)))))).	703	737	0.846154	-30.5	0	0.000127159	0.456	2.74492	2.97662	-6.53765	19	25	6	CDS		0	1
hsa-miR-1343-3p	NM_001346897	EGFR	CTCCTGGGGCCCGCACTCTCGC#CGGCGAGTCGGGCTCTGGAGG#((((.((((((((.(((((((.#))).)))))))))))))))).	319	340	0.923077	-28.6	0	4.87e-05	0.397	-0.415677	1.29949	-8.91345	19	21	16	CDS		0	1
hsa-miR-4688	NM_001346897	EGFR	TAGGGGCAGCAGAGGACCTGGG#CCAGGTCTTGAAGGCTGTCCA#...(((((((..(((((((((.#)))))))))....))))))).	2016	2037	1	-29.5	0	0.000323124	0.412	3.87597	2.18722	-12.6861	16	21	9	CDS		0	0
hsa-miR-4688	NM_001346897	EGFR	TAGGGGCAGCAGAGGACCTGGG#CCCTGTTCTCTCTGCTGGCTCTAT#(((((.((((((((((.(.(((#))).).)).)))))))).))))).	3752	3776	0.923077	-28.5	0	0.0055656	0.603	-0.0280331	-0.163189	-5.83853	19	24	8	3UTR		0	0
hsa-miR-4689	NM_001346897	EGFR	TTGAGGAGACATGGTGGGGGCC#GGCCCCCGGGAGAGCGACTGCCTGGTCTGCCGCAAA#(((.((((((..((((((((((#)))))))............)))..)))).)).))).	849	885	0.846154	-28.5	0	0.000137064	0.353	3.66071	4.00744	-13.1412	19	36	7	CDS		0	0
hsa-miR-4689	NM_001346897	EGFR	TTGAGGAGACATGGTGGGGGCC#GGCCCCCACTGCGTCAAGACCTG#...(((.(((.(((((((((((#))))))))))).)))....))).	1887	1910	0.923077	-28.3	0	0.000151948	0.412	3.40682	3.17848	-10.883	17	23	11	CDS		0	0
hsa-miR-4689	NM_001346897	EGFR	TTGAGGAGACATGGTGGGGGCC#CCCCCACTCATGCTCTACAAC#(((.((((.(((((((((((..#))))))).)))))))).))).	918	939	1	-26.2	0	0.468616	0.412	2.12434	3.97914	-8.02599	18	21	8	CDS		0	0
hsa-miR-4691-5p	NM_001346897	EGFR	GTCCTCCAGGCCATGAGCTGCGG#CTGCGCTCTGCCCGGCGAGTCGGGCTCTGGAGGAA#.(((((((((((..((((.((((#))))))))..............))).)))))))).	307	342	0.923077	-28.9	1	9.48e-05	0.412	0.700729	1.29555	-5.9393	19	35	8	CDS		0	0
hsa-miR-4692	NM_001346897	EGFR	TCAGGCAGTGTGGGTATCAGAT#TTTGGTGCCACCTGCGTGAA#(((.((((.((.(((((((((.#))))))))))))))).))).	984	1004	0.846154	-23.5	0	0.00380434	0.456	5.91378	4.369	-11.3728	18	20	15	CDS		0	0
hsa-miR-4693-3p	NM_001346897	EGFR	TGAGAGTGGAATTCACAGTATTT#AGGTATTGGTGAATTTAAAGACTCACTCTCC#.((((((((((((((((((((((#)))))))).))))))).......))))))).	1145	1176	0.923077	-19.4	1	0.0493105	0.676	2.46518	4.11719	-3.79332	22	31	8	CDS		0	0
hsa-miR-4694-5p	NM_001346897	EGFR	AGGTGTTATCCTATCCATTTGC#GCCGGTGGCATTTAGGGGTGACTCCTT#(((.(((((((((((((((.((#)).))))).))...)))))))).))).	1241	1268	0.846154	-18.8	0	0.000380784	0.441	3.18029	3.16621	-6.9696	20	27	8	CDS		0	0
hsa-miR-4695-5p	NM_001346897	EGFR	CAGGAGGCAGTGGGCGAGCAGG#CCTCCACCGTGCAGCTCATCACGCAGCTCATGCCCTTCGGCTGCCTCCTGG#(((((((((((((((((((...#.))))..))))....))))))))))).	2473	2524	0.923077	-35.1	1	1.02e-05	0.471	4.45653	4.90678	-3.93757	19	27	11	CDS		0	0
hsa-miR-4695-3p	NM_001346897	EGFR	TGATCTCACCGCTGCCTCCTTC#AGGAGGTGGCTGGTTATGTCC#.(((...(((((((((((((..#)))))))))).)))...))).	508	529	0.846154	-21.7	0	0.000879982	0.5	4.81287	3.13772	-11.357	16	21	10	CDS		0	0
hsa-miR-4696	NM_001346897	EGFR	TGCAAGACGGATACTGTCATCT#GGTGACAGATCACGGCTCGTGCGT#((((.(((((((.((((((((.#))))))))))).))..)).)))).	1025	1049	0.923077	-19.8	0	1.61e-05	0.412	5.03497	4.19605	-9.34574	19	24	11	CDS		0	0
hsa-miR-4696	NM_001346897	EGFR	TGCAAGACGGATACTGTCATCT#ATGGTCAGTTTTCTCTTGCAG#(((((((.(((.((((((((..#)))).)))).)))))))))).	1423	1444	0.923077	-18.2	1	0.00411035	0.485	3.324	3.3176	-9.59801	18	21	10	CDS		0	0
hsa-miR-4697-5p	NM_001346897	EGFR	AGGGGGCGCAGTCACTGACGTG#CACGTCACGGACTCCCCTCCTG#((((((.(.((((..(((((((#)))))))..)))).))))))).	3209	3231	0.846154	-25.4	0	0.000687785	0.426	3.64978	3.74423	-8.12994	18	22	7	CDS		0	0
hsa-miR-4697-3p	NM_001346897	EGFR	TGTCAGTGACTCCTGCCCCTTGGT#ACCTGCCCGGCAGGAGTCATGGGAGAA#(.((.((((((((((((....(((#))).....))))))))))))..)).).	1905	1932	0.923077	-26.8	0	2.78e-05	0.426	2.31068	3.0409	-9.22029	18	27	12	CDS		0	0
hsa-miR-4697-3p	NM_001346897	EGFR	TGTCAGTGACTCCTGCCCCTTGGT#GCTGGGGTGCAGGAGAGGAGAACTGCCAGAAACTGACC#.((((((..(((((((.(((((((#))))))).)))))))................)))))).	721	759	1	-26.4	1	0.00307784	0.426	6.95694	3.33378	-7.16335	20	38	7	CDS		0	0
hsa-miR-4700-5p	NM_001346897	EGFR	TCTGGGGATGAGGACAGTGTGT#GCAGGCTGCACAGGCCCCCGGGA#(((((((.(..(..((((.(((#))).))))..)..).))))))).	837	860	0.846154	-21.5	1	0.000241515	0.338	2.03467	4.05394	-12.4645	16	23	7	CDS		0	0
hsa-miR-4700-3p	NM_001346897	EGFR	CACAGGACTGACTCCTCACCCCAGTG#CAATGGGAGCTGCTGGGGTGCAGGAGAGGAGAACTGC#..(((..((..((((((((((((((.#.))))))))).)))))...))..))).	710	747	1	-30.9	0	0.00385444	0.441	4.01443	3.41761	-12.4689	19	27	9	CDS		0	0
hsa-miR-4701-5p	NM_001346897	EGFR	TTGGCCACCACACCTACCCCTT#GGGCCTAAGATCCCGTCCATCGCCACTGGGATGGTGGGGGCCCTCCTCTTGCTGCTGGTGGTGGCCC#..(((((((((.(((((((((.#.)))..))))))...................))))))))).	2043	2110	0.846154	-26.8	1	8.45e-06	0.309	1.87282	3.16345	-8.3038	18	41	9	CDS		0	0
hsa-miR-4701-3p	NM_001346897	EGFR	ATGGGTGATGGGTGTGGTGT#ACGCCTCCCTCAGCCACCCATA#(((((((.((((.(.(((((#))))).).))))..))))))).	2918	2940	0.871795	-22.4	1	0.109624	0.5	4.5364	5.92881	-8.27579	17	22	7	CDS		0	0
hsa-miR-4703-3p	NM_001346897	EGFR	TGTAGTTGTATTGTATTGCCAC#GCAGCGATACAGCTCAG#((.(((((((((((..(((...#)))))))))))))))).	3323	3340	0.846154	-16.5	0	0.00119514	0.426	3.877	2.03808	-6.46361	16	17	16	CDS		0	0
hsa-miR-4704-5p	NM_001346897	EGFR	GACACTAGGCATGTGAGTGATT#GACACCTTCCTCCCAGTGCCTGGTGA#..((((((((((..(((.((..#.)))))...)))))))))).	3375	3401	1	-21.2	1	6.66e-06	0.426	2.08932	0.849402	-7.10297	15	20	10	CDS		0	0
hsa-miR-4705	NM_001346897	EGFR	TCAATCACTTGGTAATTGCTGT#GCATTTGCCAAGTC#......(((((((((.(((...#))).))))))))).	3086	3100	1	-16.5	0	0.0190572	0.515	4.45984	4.72355	-15.7996	12	14	9	CDS		0	0
hsa-miR-4707-3p	NM_001346897	EGFR	AGCCCGCCCCAGCCGAGGTTCT#GCCTTGTGCTCCCCCGAGGGCTGCTGGGGCCCGGAGCC#.((((((((((((...((((((#.))))))))))))))..)).)).	1647	1685	0.846154	-26.1	1	1.49e-08	0.309	3.68591	1.92042	-5.61866	18	23	14	CDS		0	0
hsa-miR-4708-5p	NM_001346897	EGFR	AGAGATGCCGCCTTGCTCCTT#GGAGCCCAGGGACTGCGTCTCTT#((((((((.((((((((((..#)))))..)))).).)))))))).	1679	1702	0.846154	-24.9	1	1.1e-05	0.309	1.77299	2.22846	-4.99396	18	23	8	CDS		0	0
hsa-miR-4708-3p	NM_001346897	EGFR	AGCAAGGCGGCATCTCTCTGAT#CAGCGTGGACAACCCCCACGTGTGCCGCCTGCTG#(((.(((((((((.........#.)))))))))))).	2426	2460	0.923077	-21.3	0	4.72e-05	0.324	5.79277	5.46557	-8.79494	12	14	12	CDS		0	0
hsa-miR-4709-3p	NM_001346897	EGFR	TTGAAGAGGAGGTGCTCTGTAGC#GCCACTGGGATGGTGGGGGCCCTCCTCTTG#...(((((((((.(((((.....#.)))))))))))))).	2064	2094	1	-24.1	0	6.77e-06	0.294	4.00269	1.79551	-7.80367	14	16	14	CDS		0	1
hsa-miR-4709-3p	NM_001346897	EGFR	TTGAAGAGGAGGTGCTCTGTAGC#CAGAGTGCCTGCCTCA#.....((((((((((((((....#)))))))))).)))).	1804	1820	0.846154	-23.2	0	1.43e-05	0.397	3.39687	3.03572	-13.6656	14	16	10	CDS		0	1
hsa-miR-203b-5p	NM_001346897	EGFR	TAGTGGTCCTAAACATTTCACA#TGTGCTATGCAAATACAATAAACTGGAAAAAACTGTTTGGGACCT#....(((((((((((((((.((#.))))))....))))))))))).	1531	1576	1	-18.3	0	0.00411738	0.647	2.786	2.97447	-9.54656	17	23	11	CDS		0	0
hsa-miR-4710	NM_001346897	EGFR	GGGTGAGGGCAGGTGGTT#CACCTGCCCCCCACTCA#(((((.(((((((((...#)))))))))..))))).	911	928	0.923077	-26.3	0	0.0993037	0.397	4.15724	4.05205	-6.07158	14	17	9	CDS		0	0
hsa-miR-4712-5p	NM_001346897	EGFR	TCCAGTACAGGTCTCTCATTTC#GACACCTTCCTCCCAGTGCCTGGTGAGTGGCTTGTCTGGAA#(((((.(((((((.((((((..#.)))))).)))))))))))).	3375	3416	0.846154	-24.3	0	1.31e-06	0.397	3.86502	1.09534	-6.69537	18	21	12	CDS		0	0
hsa-miR-4713-5p	NM_001346897	EGFR	TTCTCCCACTACCAGGCTCCCA#TGGGAGCTGCTGGGGTGCAGGAGAGG#((((((((((.(((((((((((#)))))))..))))))))..)))))).	713	739	0.846154	-29.1	1	0.000188606	0.456	4.24883	3.21344	-6.76235	21	26	8	CDS		0	0
hsa-miR-4713-3p	NM_001346897	EGFR	TGGGATCCAGACAGTGGGAGAA#CTCCTCCTCTGGATCCACAG#(((((((((((..(.(((((..#))))).)))))))))).)).	1276	1296	1	-23.4	1	0.000144099	0.529	3.45604	3.17376	-9.30896	17	20	10	CDS		0	0
hsa-miR-4714-5p	NM_001346897	EGFR	AACTCTGACCCCTTAGGTTGAT#GTGAGCCAAGGGAGTTTGTGGAGA#..((((((((((((.((((.((#)).))))))))).)))...)))).	1756	1780	0.897436	-18.3	1	0.0773237	0.441	2.53997	2.9839	-5.69245	18	24	9	CDS		0	0
hsa-miR-4714-3p	NM_001346897	EGFR	CCAACCTAGGTGGTCAGAGTTG#CTGGCCAAACTGCTGGGTGCGGA#((.((((((.(((((((.....#))))))).....))))))..)).	2697	2720	0.846154	-18.7	0	0.000210083	0.485	4.76225	5.54793	-6.73762	15	23	7	CDS		0	0
hsa-miR-4715-5p	NM_001346897	EGFR	AAGTTGGCTGCAGTTAAGGTGG#CCACTCAGCAGCAGCCAGTCTC#.((((((((((.(((..(((((#))))).))).)))))))).)).	3443	3465	0.923077	-22.1	1	0.0193867	0.368	0.0109907	-0.747888	-7.37318	18	22	8	CDS		0	0
hsa-miR-4715-3p	NM_001346897	EGFR	GTGCCACCTTAACTGCAGCCAAT#GCTGCTGGTGGTGGCC#..((((((...((((((((....#))))).))))))))).	2093	2109	1	-21	1	8.03e-06	0.309	1.52474	2.69625	-10.0807	14	16	9	CDS		0	0
hsa-miR-4716-5p	NM_001346897	EGFR	TCCATGTTTCCTTCCCCCTTCT#GATGGATGAAGAAGACATGGAC#(((((((((.((((..((.((.#)).))..)))).))))))))).	3128	3150	0.846154	-20.2	1	0.00892508	0.471	5.41757	4.26962	-6.14858	17	22	9	CDS		0	0
hsa-miR-4717-5p	NM_001346897	EGFR	TAGGCCACAGCCACCCATGTGT#CACTGGGATGGTGGGGGCCC#..((((...((((((((.(((.#))))))).))))...)))).	2066	2086	0.846154	-24.2	0	4.71e-06	0.324	3.4356	1.86854	-9.87071	15	20	7	CDS		0	0
hsa-miR-4717-3p	NM_001346897	EGFR	ACACATGGGTGGCTGTGGCCT#CCTCAGCCACCCATATGTA#(((.(((((((((((.((...#)).))))))))))).))).	2925	2944	0.846154	-27.3	0	0.110949	0.5	4.50535	5.95869	-7.20265	16	19	11	CDS		0	0
hsa-miR-4717-3p	NM_001346897	EGFR	ACACATGGGTGGCTGTGGCCT#GGCCATGTGTGCCACCTGTGC#...(((((((((((((((((.#)))))))...)))))))))).	1965	1986	1	-27.3	0	6.14e-05	0.397	2.29653	3.52513	-6.51454	17	21	10	CDS		0	0
hsa-miR-4720-5p	NM_001346897	EGFR	CCTGGCATATTTGGTATAACTT#GCCATGTGTGCCAC#..((((((((.((((.......#)))).)))))))).	1966	1980	0.923077	-17.3	1	0.000281792	0.397	3.30621	3.29754	-8.01482	12	14	8	CDS		0	0
hsa-miR-4721	NM_001346897	EGFR	TGAGGGCTCCAGGTGACGGTGG#ACCGTCGCTTGGTGCACCGCGA#((.((((.((((((((((((..#)))))))))))).)).)).)).	2614	2636	0.807692	-28.7	0	7.08e-05	0.426	4.44933	5.5878	-7.80875	18	22	12	CDS		0	0
hsa-miR-4721	NM_001346897	EGFR	TGAGGGCTCCAGGTGACGGTGG#CCACTGGGATGGTGGGGGCCCTCC#.(((((((((..((..((((((#))))))..))....))))))))).	2065	2089	0.846154	-28.6	1	2.48e-08	0.324	3.4356	1.97982	-10.9334	17	24	9	CDS		0	0
hsa-miR-4722-5p	NM_001346897	EGFR	GGCAGGAGGGCTGTGCCAGGTTG#CGGCCGGGGCAGCGCTCCTGGCG#(.((((((.(((((.((.(((((#))))))).))))).)))))).).	277	300	0.846154	-35.2	1	8.79e-07	0.221	-0.2191	0.0227263	-6.89309	19	23	7	CDS		0	0
hsa-miR-4520-2-3p	NM_001346897	EGFR	TTTGGACAGAAAACACGCAGGT#ATCTGTGTGTGTGAGTGTTCAT#..((((((....((((((((((#)))))))))).....)))))).	3671	3693	0.846154	-20	1	0.00931785	0.588	-0.242052	-0.312884	-13.4275	16	22	10	3UTR		0	0
hsa-miR-4723-5p	NM_001346897	EGFR	TGGGGGAGCCATGAGATAAGAGCA#TGCTCCGGGCGCTGCCGTGGCAAGTCCCCCAG#(((((((((((((((....(((((#)))))......))..))))))...))))))).	780	812	0.923077	-27.2	1	2.63e-05	0.324	3.28529	4.34733	-4.17062	20	32	7	CDS		0	0
hsa-miR-4724-5p	NM_001346897	EGFR	AACTGAACCAGGAGTGAGCTTCG#GGCTGCCTCCTGGA#.......(((((((..((((...#))))..))))))).	2511	2525	0.846154	-19.2	0	8.24e-06	0.456	4.18447	4.83882	-18.0787	11	14	7	CDS		0	0
hsa-miR-4724-3p	NM_001346897	EGFR	GTACCTTCTGGTTCAGCTAGT#CTGGCAGCCAGGAACGTACT#((((.((((((((..(((((.#)))))))))))))..)))).	2637	2657	0.871795	-19.1	0	0.00111387	0.426	4.56773	5.544	-9.6489	17	20	13	CDS		0	0
hsa-miR-4725-5p	NM_001346897	EGFR	AGACCCTGCAGCCTTCCCACC#GAGGGCTGCTGGGG#...(((.(((((((((.....#))))))))).))).	1662	1676	0.846154	-23.9	0	1.29e-07	0.279	4.87592	1.78602	-8.05823	12	14	9	CDS		0	0
hsa-miR-4725-5p	NM_001346897	EGFR	AGACCCTGCAGCCTTCCCACC#TGGGAGCTGCTGGGGTG#..((((((((((..(((((..#)))))))))).))))).	713	730	0.923077	-23.9	1	7.91e-06	0.426	5.4015	3.39577	-7.10297	15	17	10	CDS		0	0
hsa-miR-4725-3p	NM_001346897	EGFR	TGGGGAAGGCGTCAGTGTCGGG#CCCACTACATTGACGGCCCCCAC#(((((..(.(((((((((.(((#)))...))))))))).)))))).	1873	1896	1	-26.4	0	0.00290247	0.412	2.69137	3.14433	-8.43861	18	23	9	CDS		0	0
hsa-miR-4726-3p	NM_001346897	EGFR	ACCCAGGTTCCCTCTGGCCGCA#TGCGGAGGCTGCTGCAGGAGAGGGAGCTTGTGGA#.((((((((((((((..(((((#))))).............)))))))))))).)).	2161	2195	0.923077	-29.2	1	1.74e-05	0.368	5.02743	4.28565	-4.02637	19	34	12	CDS		0	0
hsa-miR-4728-5p	NM_001346897	EGFR	TGGGAGGGGAGAGGCAGCAAGCA#GCTTCTTCAGCAGCCCCTCCACGTCACGGACTCCCCTCCTG#.((((((((((.(((.((((((.#)))).....)).)))...............)))))))))).	3190	3231	0.923077	-27.3	1	0.000687785	0.426	3.17678	3.42796	-7.37318	19	41	10	CDS		0	0
hsa-miR-4728-3p	NM_001346897	EGFR	CATGCTGACCTCCCTCCTGCCCCAG#CTGGGGCCCGGAGCCCAGGGACTGCGTCTCTTGCCGGAATGTCAGCC#...((((((.(((((((.(((((((#)))))))..))))......................)))..)))))).	1670	1717	0.846154	-28.8	0	0.00060136	0.368	8.61973	2.14207	-7.75705	20	47	7	CDS		0	0
hsa-miR-4730	NM_001346897	EGFR	CTGGCGGAGCCCATTCCATGCCA#GCAGGAGAGGAGAACTGCCAGA#(((((((..(((.((((.(((..#))))))).)).)..))))))).	729	751	1	-24.4	1	0.00748955	0.441	5.80191	3.34635	-8.59673	17	22	7	CDS		0	0
hsa-miR-4731-5p	NM_001346897	EGFR	TGCTGGGGGCCACATGAGTGTG#CACAACCAGTGTGCTGCAGGCTGCACAGGCCCCCGGGAG#(.(((((((((.....(((.((#.)).))).....))))))))).).	822	861	0.824176	-26.4	1	0.00157885	0.338	4.38172	3.59428	-11.5625	15	24	9	CDS		0	0
hsa-miR-4731-3p	NM_001346897	EGFR	CACACAAGTGGCCCCCAACACT#GGGCCAAAAGTGTGA#(((((...((((((........#))))))...))))).	683	698	1	-19.9	0	0.0135836	0.456	3.96084	2.49596	-10.6644	11	15	6	CDS		0	0
hsa-miR-4732-5p	NM_001346897	EGFR	TGTAGAGCAGGGAGCAGGAAGCT#AGCCACGTGCAAGGACACCTGCCCCCCACTCATGCTCTACAA#((((((((((((.(((((...((#.))...))))).)))......))))))))).	896	938	0.846154	-26.9	1	0.475973	0.412	3.36982	4.0568	-5.22671	19	31	9	CDS		0	0
hsa-miR-4733-5p	NM_001346897	EGFR	AATCCCAATGCTAGACCCGGTG#GCCGGTGGCATTTAGGGGTG#.((((((((((((...(((((.#))))))))))))..))))).	1241	1261	0.923077	-21.3	1	2.96e-06	0.441	3.2501	3.11909	-5.61866	17	20	12	CDS		0	0
hsa-miR-4733-3p	NM_001346897	EGFR	CCACCAGGTCTAGCATTGGGAT#GTCCCAATGGGAGCTGCTGGG#(((.(((.(((..(((((((((#)))))))))))).))).))).	706	727	0.923077	-24.3	0	0.000265009	0.456	3.13763	3.33941	-13.9192	18	21	12	CDS		0	0
hsa-miR-4733-3p	NM_001346897	EGFR	CCACCAGGTCTAGCATTGGGAT#TCCCAGTGCCTGGTGA#.((((((.....(((((((((.#))))))))))))))).	3385	3401	1	-23.9	1	6.66e-06	0.426	2.19293	0.828908	-14.5774	15	16	15	CDS		0	0
hsa-miR-4734	NM_001346897	EGFR	GCTGCGGGCTGCGGTCAGGGCG#TGCCTTGTGCTCCCCCGAGGGCTGCTGGGGCCCGGAGCC#(((.((((((.(((((((((((#)))))))................)))).)))))).))).	1646	1685	0.846154	-32	0	1.49e-08	0.309	3.32521	1.82521	-9.79437	20	39	7	CDS		0	0
hsa-miR-4735-3p	NM_001346897	EGFR	AAAGGTGCTCAAATTAGACAT#TTGGGCACTTTTG#((((((((((((.........#)))))))))))).	381	394	0.865385	-15.2	1	0.000506778	0.515	1.45077	2.80469	-7.05204	12	13	12	CDS		0	0
hsa-miR-4736	NM_001346897	EGFR	AGGCAGGTTATCTGGGCTG#AGTGCATACAGTGCCACCCAGAGTGCCTGCCTC#((((((((..((((((.((#.))))))))..)))))))).	1786	1819	1	-26.8	1	1.52e-05	0.412	3.80195	2.78302	-6.23647	16	20	8	CDS		0	0
hsa-miR-3064-5p	NM_001346897	EGFR	TCTGGCTGTTGTGGTGTGCAA#TGCAAGGCCACAGGCCAGGT#(((((((..((((((.((((.#))))..))))))))))))).	1620	1640	0.923077	-24.2	1	2.19e-06	0.382	-0.211653	2.60092	-7.54065	17	20	13	CDS		0	0
hsa-miR-4738-5p	NM_001346897	EGFR	ACCAGCGCGTTTTCAGTTTCAT#GAAACTGAATTCAAAAAGATCAAAGTGCTGGG#.((((((((..(((((((((..#)))))))))..)............))))))).	2250	2282	0.923077	-22.8	1	0.00024773	0.515	6.18368	5.01893	-7.86061	17	32	9	CDS		0	0
hsa-miR-4738-5p	NM_001346897	EGFR	ACCAGCGCGTTTTCAGTTTCAT#GAGGCAGGGAATGCGTGGA#.(((.(((((((((.(((((..#))))).)))))))))))).	1717	1736	0.923077	-20.4	0	0.000179785	0.412	3.05298	3.31089	-8.64781	17	19	12	CDS		0	0
hsa-miR-4738-5p	NM_001346897	EGFR	ACCAGCGCGTTTTCAGTTTCAT#GACTGAGGACAGCATAGACGACACCTTCCTCCCAGTGCCTGGTG#((((((((((((((((((....#))))))))))........................)))).)))).	3356	3400	0.923077	-17.8	1	1.96e-05	0.426	2.427	1.35152	-3.93757	18	44	10	CDS		0	0
hsa-miR-4738-3p	NM_001346897	EGFR	TGAAACTGGAGCGCCTGGAGGA#TCCAAGCCAGGTGCTCCC#.......(((((((((((.(((#)))...))))))))))).	3470	3488	0.923077	-25.5	0	0.00061528	0.382	-1.27457	-0.605559	-17.1102	14	18	11	CDS		0	0
hsa-miR-4739	NM_001346897	EGFR	AAGGGAGGAGGAGCGGAGGGGCCCT#GGGCTTCTTCAGCAGCCCCTCCACGTCACGGACTCCCCTCCTG#..((((((.(((((((((((((...#.))))))))........).)))))))))).	3188	3231	0.846154	-33.4	1	0.000687785	0.426	4.20417	3.77385	-6.01339	19	30	10	CDS		0	0
hsa-miR-4740-5p	NM_001346897	EGFR	AGGACTGATCCTCTCGGGCAGG#CCTCTTGCTGCTGGTGGTGGCCCTGGGGATCGGCCTC#(((.(((((((((..((((...#.)))).)))))))))))).	2087	2124	0.923077	-26.7	0	2.06e-06	0.368	1.52474	2.69625	-8.56189	16	19	12	CDS		0	0
hsa-miR-4740-5p	NM_001346897	EGFR	AGGACTGATCCTCTCGGGCAGG#CCTGCCCGGCAGGAGTCATGGGAGAAAACAACACCCTGGTCTG#.(((((((((((.(((((((((#))))))))).)))).)))....................)))).	1906	1949	0.923077	-25.5	1	0.000138125	0.382	2.85898	3.13035	-5.08246	20	43	9	CDS		0	0
hsa-miR-4740-3p	NM_001346897	EGFR	GCCCGAGAGGATCCGTCCCTGC#GTGGGGGCCCTCCTCTTGCTGCTGGTGGTGGCC#(((((((((((...((((((((#))))))))..))))))))...........))).	2076	2109	0.846154	-25	1	8.03e-06	0.309	2.08399	2.40933	-9.43035	19	33	8	CDS		0	0
hsa-miR-4741	NM_001346897	EGFR	CGGGCTGTCCGGAGGGGTCGGCT#AGCGATGCGACCCTCCGGGACGGCCGGG#(.(((((((((((.((((((...#.))))))))))).)))))).).	257	285	0.820513	-34.3	1	2.83e-08	0.235	0.344666	-0.282152	-5.95809	18	22	11	5UTR		0	0
hsa-miR-4742-5p	NM_001346897	EGFR	TCAGGCAAAGGGATATTTACAGA#CTGAGGACAGCATAGACGACACCTTCCTCCCAGTGCCTGGT#(((((((..((((..........#.))))..))))))).	3358	3399	0.923077	-18.4	1	0.0001479	0.426	1.28857	2.42364	-9.13294	11	15	7	CDS		0	0
hsa-miR-4742-3p	NM_001346897	EGFR	TCTGTATTCTCCTTTGCCTGCAG#CTGGGGTGCAGGAGAGGAGAACTGCCAGAA#(((((((((((((((.((((((.#.))))))))))))))).))).))).	722	752	0.923077	-26.8	1	0.00782244	0.441	2.21813	3.45209	-4.17062	21	25	15	CDS		0	0
hsa-miR-4743-3p	NM_001346897	EGFR	TTTCTGTCTTTTCTGGTCCAG#CTGGGTGCGGAAGAGAAAGAAT#.((((.(((((((((.(((((#)))))..))))))))).)))).	2709	2731	0.807692	-20	0	0.193872	0.471	5.00844	5.88624	-5.92733	18	22	9	CDS		0	0
hsa-miR-4745-3p	NM_001346897	EGFR	TGGCCCGGCGACGTCTCACGGTC#GCCGGAATGTCAGCCGAGGCA#..((((((((((((.((.((((.#))))))))))).)))).))).	1702	1723	0.923077	-25.4	1	5.04e-05	0.397	2.48839	3.67046	-5.69245	18	21	11	CDS		0	0
hsa-miR-4745-3p	NM_001346897	EGFR	TGGCCCGGCGACGTCTCACGGTC#GGCCGAGGCGGCCGGAGTCC#.((((((((..((((((..((((#))))))))))))))).))).	74	94	0.923077	-25.2	1	1.33e-08	0.147	0.0281674	-0.135277	-7.86061	18	20	15	5UTR		0	0
hsa-miR-4747-5p	NM_001346897	EGFR	AGGGAAGGAGGCTTGGTCTTAG#AGGCCAGGTCTGCCATGCCTT#(((.(.(((((((((((((...#))))))))))).)).).))).	1631	1652	0.846154	-22.9	0	0.000222203	0.309	1.21337	2.75259	-8.87056	17	21	11	CDS		0	0
hsa-miR-4748	NM_001346897	EGFR	GAGGTTTGGGGAGGATTTGCT#GCAGATAGTCGCCCAAAGTTCC#(((.((((((((..((((((.#))))))..)).)))))).))).	2988	3010	0.846154	-21.1	0	0.00488839	0.544	4.44208	5.75142	-9.11557	17	22	6	CDS		0	0
hsa-miR-4749-5p	NM_001346897	EGFR	TGCGGGGACAGGCCAGGGCATC#GTGCCCAGCAGTGCTCCGGGCGCTGCCGTGGCAAGTCCCCCAG#((.((((((..((((.((((..#.)))).))))..)))))))).	769	812	0.846154	-31.4	0	2.63e-05	0.324	2.69783	3.93651	-9.79544	16	21	8	CDS		0	0
hsa-miR-4749-5p	NM_001346897	EGFR	TGCGGGGACAGGCCAGGGCATC#GTGCCTGGTGAGTGGCTTGTCTGGAAACAGTCCTGCT#.((((((((((((((((((((.#))))))......)))))))))..........))))).	3390	3427	1	-27.1	1	0.00186347	0.412	0.949028	0.854526	-3.79332	20	37	9	CDS		0	0
hsa-miR-4749-3p	NM_001346897	EGFR	CGCCCCTCCTGCCCCCACAG#CTGTCCCAATGGGAGCTGCTGGGGTGCAGGAGAGGA#...(((((((((((((((((#.))).))))).))))))).)).	704	740	1	-29.9	0	0.000656959	0.471	3.39097	3.30828	-6.51454	17	22	7	CDS		0	0
hsa-miR-4749-3p	NM_001346897	EGFR	CGCCCCTCCTGCCCCCACAG#CTGTGGGGCCGACAGCTATGAGATGGAGGAAGACGGCGT#(((((((((((.((((((((#)))))))).)).............))))).....)))).	1055	1094	1	-26.3	1	0.00147774	0.412	3.65993	4.6769	-7.28438	19	39	8	CDS		0	0
hsa-miR-4750-5p	NM_001346897	EGFR	CTCGGGCGGAGGTGGTTGAGTG#CGCCCAGACCGGACGACAGGCCACCTCGTCGGCGTCCGCCCGAGT#((((((((((.((.(.((((((#.))).))).).)).)))))))))).	118	163	0.923077	-32	1	1.08e-07	0.25	-0.222067	-0.163094	-7.85224	19	25	10	5UTR		0	0
hsa-miR-4751	NM_001346897	EGFR	AGAGGACCCGTAGCTGCTAGAAGG#CCTTCTTAAAGACCATCCAGGAGGTGGCTGGTTATGTCCTCA#.((((((...((((((((((((((#))))))................)))))))).....)))))).	490	532	1	-23.9	1	0.00527419	0.5	4.04613	3.4579	-8.40586	20	42	8	CDS		0	0
hsa-miR-4752	NM_001346897	EGFR	TTGTGGATCTCAAGGATGTGCT#AGTCGTCAGCCTGAACATAACATCCTTGGGATTACGCT#..(((((((((((((((((...#.)))))))))))))).))).	1442	1480	1	-23.9	1	7.86e-05	0.515	1.56845	4.40296	-4.957	17	20	14	CDS		0	0
hsa-miR-4752	NM_001346897	EGFR	TTGTGGATCTCAAGGATGTGCT#CACATACTCCTCCTCTGGATCCACAGG#((((((((((..((((((((..#))))......))))..)))))))))).	1270	1297	0.923077	-21.4	1	0.000240172	0.544	4.00278	3.20524	-10.1092	18	27	10	CDS		0	0
hsa-miR-4753-5p	NM_001346897	EGFR	CAAGGCCAAAGGAAGAGAACAG#CTGTTCTCTCTGCTGGCTC#...(((((..((.(((((((((#)))))))))))..))))).	3754	3773	0.923077	-22.7	0	0.00197291	0.588	-0.419252	-0.211384	-10.1026	16	19	11	3UTR		0	0
hsa-miR-4755-5p	NM_001346897	EGFR	TTTCCCTTCAGAGCCTGGCTTT#GAGTCGGGCTCTGGAGGA#....(((((((((((((((((.#))))))))))))))))).	323	341	1	-31.5	0	6.79e-05	0.397	0.117763	1.3801	-9.54656	17	18	17	CDS		0	0
hsa-miR-4755-3p	NM_001346897	EGFR	AGCCAGGCTCTGAAGGGAAAGT#ACTGAGGACAGCATAGACGACACCTTCCTCCCAGTGCCTGGTG#.(((((((.(((..(((((.((#.)).)))))..))).))))))).	3357	3400	1	-24.6	1	1.96e-05	0.426	2.51824	1.89846	-6.99569	17	23	7	CDS		0	0
hsa-miR-4757-5p	NM_001346897	EGFR	AGGCCTCTGTGACGTCACGGTGT#GCCGGAATGTCAGCCGAGGCA#..(((((.(((((((..((((..#))))..)))))).).))))).	1702	1723	0.923077	-24.6	0	5.04e-05	0.397	2.66652	3.6955	-7.50368	16	21	6	CDS		0	0
hsa-miR-4757-5p	NM_001346897	EGFR	AGGCCTCTGTGACGTCACGGTGT#GCACCTACGGATGCACTGGGCCA#.(((((..(((.((((..(((((#)))))....))))))).))))).	1996	2019	0.923077	-23.6	0	0.00259453	0.412	5.63182	2.63139	-10.9974	17	23	7	CDS		0	0
hsa-miR-4758-5p	NM_001346897	EGFR	GTGAGTGGGAGCCGGTGGGGCTG#CAGCCCCTCCACGTCACGGACTCCCCTCC#..(((.(((((((((.(((((((#))))))).)).......)).)))))))).	3200	3229	0.923077	-31	0	0.00147235	0.412	3.33936	3.69576	-7.09101	19	29	8	CDS		0	0
hsa-miR-4762-3p	NM_001346897	EGFR	CTTCTGATCAAGATTTGTGGTG#ACCTGCAGATCATCAGAGGA#((((((((...((((((((((.#))).))))))))))))))).	568	588	1	-19.4	1	0.000266541	0.603	4.57936	2.96419	-9.06125	18	20	15	CDS		0	0
hsa-miR-4764-5p	NM_001346897	EGFR	TGGATGTGGAAGGAGTTATCT#GGGTGACTCCTTCACACATACTCCT#.((((((((((((((((((((#))))))))))))).))))...))).	1256	1281	1	-26.7	1	0.0628943	0.485	2.92108	3.48669	-3.79332	20	25	13	CDS		0	0
hsa-miR-4764-3p	NM_001346897	EGFR	TTAACTCCTTTCACACCCATGG#CCAAGCTGTCCCAATGGGAGCTGCTGGGGTGCAGGAGAGGAGA#....((((((((.(((((..(.#.)..)))))...)))))))).	699	742	0.846154	-21.7	0	0.00128743	0.456	3.25891	3.17819	-10.8357	14	21	8	CDS		0	0
hsa-miR-4764-3p	NM_001346897	EGFR	TTAACTCCTTTCACACCCATGG#CTACGGGGTGACTGTTTGGGAGTTGAT#(((((((((.((((.(((.(((#))).)))))))......))))))))).	2822	2849	0.884615	-19.5	1	0.0106573	0.5	6.4802	5.5234	-5.91553	19	27	9	CDS		0	0
hsa-miR-4768-5p	NM_001346897	EGFR	ATTCTCTCTGGATCCCATGGAT#GTCCCAATGGGAGCTGCTGGGGTGCAGGAGAGGAG#.(((((((((.((((((.....#.)))))).))).)))))).	706	741	0.923077	-21.7	1	0.000681535	0.456	3.43948	3.31893	-6.6181	15	19	6	CDS		0	0
hsa-miR-4768-5p	NM_001346897	EGFR	ATTCTCTCTGGATCCCATGGAT#TCCAGCATCTCCAGAGGGGG#..((((((((((.....((((.#)))).....)))))))))).	3488	3508	0.923077	-20.9	1	5.59e-06	0.426	-0.247054	-0.596803	-8.07147	14	20	10	CDS		0	0
hsa-miR-4768-3p	NM_001346897	EGFR	CCAGGAGATCCAGAGAGAAT#CTCTGGATCCCA#...((.(((((((((.....#))))))))))).	2313	2325	0.846154	-19.2	0	0.000130553	0.471	5.34078	5.42873	-8.64855	11	12	11	CDS		0	0
hsa-miR-4769-5p	NM_001346897	EGFR	GGTGGGATGGAGAGAAGGTATGAG#GCGATCTCCACATCCTGCCG#(((((((((..((((..((.....#))..))))..))))))))).	1225	1245	1	-23.9	1	0.000786483	0.441	2.19371	3.38344	-8.2379	15	20	9	CDS		0	0
hsa-miR-4770	NM_001346897	EGFR	TGAGATGACACTGTAGCT#GCTACCTTGTCATTCAG#(((.((((((..(((((.#)))))..))))))))).	3055	3072	0.846154	-16	0	0.00207581	0.471	5.82231	4.4961	-13.1412	14	17	9	CDS		0	0
hsa-miR-4771	NM_001346897	EGFR	AGCAGACTTGACCTACAATTA#AGGTGAAAACAGCTGCAAGGCCACAGGCCAGGTCTGCC#.(((((((((.(((.......#.))).))))))))).	1607	1645	0.923077	-19.1	1	4.33e-05	0.353	0.334757	2.05616	-7.5866	12	15	9	CDS		0	0
hsa-miR-4774-5p	NM_001346897	EGFR	TCTGGTATGTAGTAGGTAATAA#TGCTCTACAACCCCACCACGTACCAGAT#((((((((((.((.(((.....#.)))..)).)))))))))).	928	956	0.923077	-18.4	1	0.0108637	0.426	4.50703	4.28387	-7.61919	15	20	10	CDS		0	0
hsa-miR-4776-5p	NM_001346897	EGFR	GTGGACCAGGATGGCAAGGGCT#GCCCTTCGGCTGCCTCCTGGACTATG#((((.((((((.(((((((((.#))))).....)))))))))).)))).	2504	2530	0.846154	-28.4	0	4.8e-05	0.441	5.66226	4.63159	-11.4034	19	26	10	CDS		0	0
hsa-miR-4776-5p	NM_001346897	EGFR	GTGGACCAGGATGGCAAGGGCT#GGCCATGTGTGCCACCTGTGCCATC#((((..((((.(((((..((((#)))).....)))))))))..)))).	1965	1990	0.923077	-23.9	0	7.55e-05	0.382	4.39473	3.33241	-12.7823	17	25	9	CDS		0	0
hsa-miR-4776-3p	NM_001346897	EGFR	CTTGCCATCCTGGTCCACTGCAT#GCAGTGCTCCGGGCGCTGCCGTGGCAAGT#(((((((((((((..((((((..#))))))..))))).......)))))))).	776	805	0.923077	-30.2	1	6.03e-07	0.338	2.68981	4.28502	-5.52986	19	29	8	CDS		0	0
hsa-miR-4776-3p	NM_001346897	EGFR	CTTGCCATCCTGGTCCACTGCAT#ATGCACTGGGCCAGGTCTTGAAGGCT#...(((..(((((((((.(((((#))))).))))))))).......))).	2006	2032	0.923077	-25.5	0	0.000758913	0.412	3.40236	2.22754	-10.3719	17	26	9	CDS		0	0
hsa-miR-4778-3p	NM_001346897	EGFR	TCTTCTTCCTTTGCAGAGTTGA#CAGCATCTCCAGAGGGGGAAA#..(((((((((((.(((((((.#)))).))).))))))))))).	3490	3511	0.923077	-21.1	1	7.78e-06	0.426	-0.305742	-0.67349	-5.81384	18	21	11	CDS		0	0
hsa-miR-4778-3p	NM_001346897	EGFR	TCTTCTTCCTTTGCAGAGTTGA#CGGCTCGTGCGTCCGAGCCTGTGGGGCCGACAGCTATGAGATGGAGGAAGAC#(((((((((.((.((.(((((.#.))))).)).)).))))))))).	1037	1089	0.884615	-20.2	1	0.0443645	0.397	4.03631	4.39239	-6.70226	18	23	9	CDS		0	0
hsa-miR-4780	NM_001346897	EGFR	ACCCTTGAGCCTGATCCCTAGC#GCTGGGGTGCAGGAGAGGA#..((((...((((..(((((((#)))))))..)))).)))).	721	740	0.846154	-24.7	0	0.000656959	0.471	6.95694	3.33378	-11.463	15	19	7	CDS		0	0
hsa-miR-4436b-5p	NM_001346897	EGFR	GTCCACTTCTGCCTGCCCTGCC#CAGGGACTGCGTCTCTTGCCGGAATGTCAGCCGAGGCAGGGAATGCGTGGACA#((((((....((...(((((((#.)))))))...)))))))).	1685	1738	0.846154	-26.1	0	0.00130833	0.397	1.60713	3.09965	-12.9752	15	20	8	CDS		0	0
hsa-miR-4436b-3p	NM_001346897	EGFR	CAGGGCAGGAAGAAGTGGACAA#TGAAAGAATGCATTTGCCAAGTCCTACAGACTCCAACTTCTACCGTGCCCTGA#(((((((((.(((((((((...#.)))).))))).)).))))))).	3077	3130	0.846154	-27.6	1	0.0200054	0.471	5.40693	4.51943	-5.18008	18	23	7	CDS		0	0
hsa-miR-4781-5p	NM_001346897	EGFR	TAGCGGGGATTCCAATATTGG#CCATATGACGGAATCCCTGCC#..(((((((((((.(((.(((#))))))...))))))))))).	2865	2886	0.846154	-22.6	1	0.0158087	0.471	4.91588	5.26348	-5.81384	17	21	11	CDS		0	0
hsa-miR-4781-5p	NM_001346897	EGFR	TAGCGGGGATTCCAATATTGG#GAGTCCCCGCC#..((((((((((.........#)))))))))).	159	170	0.923077	-20.2	1	0.00423544	0.235	-0.542523	-0.176446	-8.07147	10	11	10	5UTR		0	0
hsa-miR-4783-5p	NM_001346897	EGFR	GGCGCGCCCAGCTCCCGGGCT#GGCCCGGAGCCCAGGGACTGCGTCT#(((((((((.(((.(((((((#))))))))))...))).).))))).	1674	1699	0.923077	-30.8	1	9.97e-06	0.294	3.32874	3.30801	-6.03692	19	25	10	CDS		0	0
hsa-miR-4783-5p	NM_001346897	EGFR	GGCGCGCCCAGCTCCCGGGCT#GTCCCAATGGGAGCTGCTGGGGTGCA#.((((.((((((((((((((.#))))....))))))))..)).)))).	706	732	0.846154	-30.9	0	6.5e-06	0.441	3.84374	3.31847	-5.69428	18	26	8	CDS		0	0
hsa-miR-4783-3p	NM_001346897	EGFR	CCCCGGTGTTGGGGCGCGTCTGC#GCAGACGCCGGCCATGTGTGCCACCTGTGCCATCCAAACTGCACCTACGGATGCACTGGGC#.((((((((((((((((((((((#))))))))..))).......))).............................)))))))).	1956	2017	1	-29.2	1	0.00213943	0.426	2.85169	2.20536	-3.79332	22	61	8	CDS		0	0
hsa-miR-4784	NM_001346897	EGFR	TGAGGAGATGCTGGGACTGA#TCCAGCATCTCCA#...((((((((((((.....#)))))))))))).	3488	3501	0.923077	-23.5	0	3e-05	0.412	-1.05488	-0.595035	-6.74759	12	13	12	CDS		0	0
hsa-miR-1245b-3p	NM_001346897	EGFR	TCAGATGATCTAAAGGCCTATA#TGGGCACTTTTGAAGATCATTTT#..((((((((((((((((((..#))))).))))...))))))))).	382	405	0.846154	-18.2	1	0.029263	0.559	2.94003	3.17554	-4.957	18	23	9	CDS		0	0
hsa-miR-1245b-3p	NM_001346897	EGFR	TCAGATGATCTAAAGGCCTATA#GCCTGCTGGGCATCTGC#.((((((.((((.((((.....#))))..)))))))))).	2452	2469	0.846154	-16.5	1	4.46e-05	0.338	6.86848	5.1223	-7.39609	14	17	10	CDS		0	0
hsa-miR-2467-5p	NM_001346897	EGFR	TGAGGCTCTGTTAGCCTTGGCTC#GAGCCAAGGGAGTTTGTGGAGAACTCTGAGTGCATACAGTGCCA#...(((.((((...(((((((((#)))))))))..........................)))).))).	1758	1802	1	-24.4	0	0.000321856	0.456	3.0645	2.99107	-13.551	16	44	9	CDS		0	0
hsa-miR-2467-3p	NM_001346897	EGFR	AGCAGAGGCAGAGAGGCTCAGG#CCTGAGCTCTCTGAGTGCA#.(((....((((((.(((((((#)))))))))))))..))).	3227	3246	0.846154	-25.6	0	8.38e-05	0.426	2.96569	2.9235	-14.4061	16	19	13	CDS		0	0
hsa-miR-2467-3p	NM_001346897	EGFR	AGCAGAGGCAGAGAGGCTCAGG#CTGGGCATCTGCCTCACCTCCACCGTGCA#.(((((((((((...((((((.#)))))).))))))))..........))).	2457	2486	0.846154	-24.8	1	0.00321747	0.338	4.90442	5.26486	-6.67474	17	29	8	CDS		0	0
hsa-miR-2467-3p	NM_001346897	EGFR	AGCAGAGGCAGAGAGGCTCAGG#CCTGTTCTCTCTGCTGGCTC#(((...((((((((((..((((#)))).)))))))))).))).	3753	3773	1	-23.5	0	0.00197291	0.588	-0.00838356	-0.158808	-12.9896	17	20	10	3UTR		0	0
hsa-miR-4786-5p	NM_001346897	EGFR	TGAGACCAGGACTGGATGCACC#GGTGCACCGCGACCTGGCA#...(.(((((.((((.((((((#))))))))).).)))))).	2624	2643	0.846154	-21.5	0	5.2e-05	0.397	6.32402	5.66921	-13.6914	16	19	9	CDS		0	0
hsa-miR-4786-5p	NM_001346897	EGFR	TGAGACCAGGACTGGATGCACC#GGATGCACTGGGCCAGGTCTTG#.((((((.((.((((.((((((#)).)))))))).)).)))))).	2004	2026	0.865385	-21	1	3.31e-05	0.456	2.93648	2.2067	-9.16478	18	22	8	CDS		0	0
hsa-miR-4787-5p	NM_001346897	EGFR	GCGGGGGTGGCGGCGGCATCCC#GGCGGCCGCCGCCGCCCAGACCGG#.((((((((((((((((..((.#))..)))))))))))))...))).	106	130	0.897436	-38.5	1	0.000523415	0.191	0.261897	-0.312195	-3.79332	18	24	13	5UTR		0	0
hsa-miR-4793-5p	NM_001346897	EGFR	ACATCCTGCTCCACAGGGCAGAGG#CCTCATTGCCCTCAACACAGTGGAGCGAATTCCTTTGGAA#...(((((((((((((((((((((#))))..)))))).......)))))))).........))).	527	567	1	-27.1	0	0.000377011	0.559	3.22131	3.51005	-6.51454	21	40	8	CDS		0	0
hsa-miR-4793-5p	NM_001346897	EGFR	ACATCCTGCTCCACAGGGCAGAGG#CTCTGCCCGGCGAGTCGGGCTCTGG#.((.(((((((....((((((((.#))))))))...))).))))...)).	312	337	0.846154	-25.8	0	2.04e-05	0.368	-0.0484862	1.23605	-13.0536	17	25	8	CDS		0	0
hsa-miR-4793-5p	NM_001346897	EGFR	ACATCCTGCTCCACAGGGCAGAGG#CTCGTGCGTCCGAGCCTGTGGGGCCGACAGCTATGAGATGGAGGAA#...((((((((((((((((((((.#))).))).......)))))))))).................)))).	1040	1086	0.923077	-25.1	0	0.0472906	0.397	3.64247	4.6307	-6.51454	20	46	10	CDS		0	0
hsa-miR-4793-3p	NM_001346897	EGFR	TCTGCACTGTGAGTTGGCTGGCT#GGCTGGCCAAACTGCTGGGTGCGGAA#((((((((...((((((((((((#)))))))))).))....)))))))).	2695	2721	0.923077	-28.9	1	0.00021355	0.5	5.18251	5.56415	-9.06125	20	26	10	CDS		0	0
hsa-miR-4795-3p	NM_001346897	EGFR	ATATTATTAGCCACTTCTGGAT#TCCTTCTTAAAGACCATCCAGGAGGTGGCTGGTTATGTC#((((.(((((((((((((((((#.)))))).))))))))))).)))).	489	528	1	-25.4	0	0.000359144	0.5	4.10076	3.56708	-8.05661	21	25	11	CDS		0	0
hsa-miR-4796-5p	NM_001346897	EGFR	TGTCTATACTCTGTCACTTTAC#AAGTGATGGAGATGTGATAA#((((.((((((((((((((...#))))))))))).))))))).	1493	1513	0.846154	-17.1	0	0.0133086	0.618	5.31619	2.4414	-8.05661	18	20	11	CDS		0	0
hsa-miR-4796-3p	NM_001346897	EGFR	TAAAGTGGCAGAGTATAGACAC#GTGCATACAGTGCCACC#....((((((..((((.(.(((#))))))))..)))))).	1787	1804	0.923077	-16.6	0	0.000663438	0.441	4.78572	2.73616	-15.7181	14	17	8	CDS		0	0
hsa-miR-4797-5p	NM_001346897	EGFR	GACAGAGTGCCACTTACTGAA#GGTGAGTGGCTTGTCTGG#..((((..((((((((((...#))))))))))...)))).	3396	3414	0.820513	-21.7	0	2.86e-07	0.412	3.28825	0.626524	-8.81432	14	18	10	CDS		0	0
hsa-miR-4797-5p	NM_001346897	EGFR	GACAGAGTGCCACTTACTGAA#CAGGAGGTGGCTGGTTATGTCC#((((....((((((..(((..#)))..))))))......)))).	507	529	0.923077	-18.9	0	0.000879982	0.5	4.82458	3.12196	-14.7834	13	22	6	CDS		0	0
hsa-miR-4797-3p	NM_001346897	EGFR	TCTCAGTAAGTGGCACTCTGT#ACAGCTTTGGTGCCACCTGCGTGAAGAA#((((((((.((((((((((((#))))....)))))))).))).))).)).	979	1007	0.923077	-21.2	1	0.0104482	0.485	6.01126	4.42677	-4.99396	20	28	8	CDS		0	0
hsa-miR-4799-3p	NM_001346897	EGFR	ACTGGCATGCTGCATTTATATA#GCAGCAGCCAGTC#((((((.((((((.........#)))))))))))).	3450	3463	1	-21.7	0	0.0133479	0.368	0.0808583	-0.596741	-7.3066	12	13	12	CDS		0	0
hsa-miR-4799-3p	NM_001346897	EGFR	ACTGGCATGCTGCATTTATATA#GTGAAAACACCGCAGCATGTCAA#..(((((((((((.........#.))))))))))).	2658	2681	0.846154	-20.3	1	0.000858878	0.485	5.60643	5.00137	-6.78234	11	13	11	CDS		0	0
hsa-miR-4799-3p	NM_001346897	EGFR	ACTGGCATGCTGCATTTATATA#GGGTGCAGGAGAGGAGAACTGCCAGA#.(((((((.((((((((.....#)))))))).).........)))))).	725	751	1	-17.9	1	0.00748955	0.441	3.82487	3.55072	-4.84971	15	26	8	CDS		0	0
hsa-miR-4800-5p	NM_001346897	EGFR	AGTGGACCGAGGAAGGAAGGA#TCCTCAACCTCCTCGACCCACTC#(((((..(((((.(((.((((#))))...))))))))..))))).	3426	3449	0.846154	-22.8	0	0.316429	0.397	-0.790157	0.299893	-8.67135	17	23	8	CDS		0	0
hsa-miR-4800-5p	NM_001346897	EGFR	AGTGGACCGAGGAAGGAAGGA#TCCTCCTCTGGATCCACA#.(((((((((((.((((....#)))))))).)).))))).	1277	1295	1	-22.2	1	0.000105128	0.515	2.96342	3.25908	-5.08246	15	18	8	CDS		0	0
hsa-miR-4800-3p	NM_001346897	EGFR	CATCCGTCCGTCTGTCCAC#TGGACGACGTGGTGGATGC#((((((((((((.(((((.#))))))))).)))))))).	3145	3164	0.846154	-21.9	1	0.00138114	0.426	3.30097	4.12938	-5.22671	17	19	9	CDS		0	0
hsa-miR-4802-5p	NM_001346897	EGFR	TATGGAGGTTCTAGACCATGTT#AACTGTTTGGGACCTCCGG#..((((((((((((((......#.)))))))))))))).	1561	1580	0.923077	-21.5	1	3.01e-05	0.647	2.51893	2.14617	-4.957	14	16	14	CDS		0	0
hsa-miR-4802-5p	NM_001346897	EGFR	TATGGAGGTTCTAGACCATGTT#GGCTTGGCCTGAAAACAGGACGGACCTCCATGC#((((((((((((((.(((.(((#))).))).)))..........))))))))))).	1349	1382	0.910256	-20.5	1	0.000541464	0.485	3.02637	4.42768	-4.67302	20	33	11	CDS		0	0
hsa-miR-4802-5p	NM_001346897	EGFR	TATGGAGGTTCTAGACCATGTT#AACACCCTGGTCTGGAAGTACGCAGACGCCGGCCATGT#(((((.((((((((((((((((#))))...)))))))))...........)))..))))).	1935	1973	0.846154	-20.3	0	6.02e-05	0.397	3.35978	3.47978	-5.83853	21	38	9	CDS		0	0
hsa-miR-4804-5p	NM_001346897	EGFR	TTGGACGGTAAGGTTAAGCAA#TGCGAAGGGCCTTGCCGC#.....((((((((((..(((.#)))....)))))))))).	1110	1128	0.846154	-19.2	0	1.87e-05	0.471	3.85768	3.46841	-13.8986	13	18	10	CDS		0	0
hsa-miR-4804-3p	NM_001346897	EGFR	TGCTTAACCTTGCCCTCGAAA#CGAGGGCAAATACAGCT#.(((.....(((((((((...#)))))))))....))).	968	985	0.846154	-19.2	0	0.000693592	0.441	3.86953	4.18306	-14.727	12	17	9	CDS		0	0
hsa-miR-5000-3p	NM_001346897	EGFR	TCAGGACACTTCTGAACTTGGA#CCTGCGTGAAGAAGTGTCCC#...((((((((((..((..((.#))...))..)))))))))).	994	1014	1	-20.2	0	0.00401779	0.5	3.73022	4.66345	-8.10683	14	20	10	CDS		0	0
hsa-miR-5001-5p	NM_001346897	EGFR	AGGGCTGGACTCAGCGGCGGAGCT#GCTCCTGGCGCTGCTGGCTGCGCTCTGCCCGGCGAGTCGGGCTCTG#((((((.(((((.((((((((((.#.))))))))..))))))).)))))).	290	336	0.923077	-36.5	0	1.23e-05	0.353	-0.0484865	0.256454	-6.77039	21	26	8	CDS		0	0
hsa-miR-5001-5p	NM_001346897	EGFR	AGGGCTGGACTCAGCGGCGGAGCT#GCTCCCCCGAGGGCTGCTGGGGCCCGGAGCCCA#.(((((((.((((((((((((((.#))))).......))))))))).))...))))).	1654	1687	0.923077	-34.5	1	1.49e-07	0.294	4.93218	1.96308	-4.84971	21	33	9	CDS		0	0
hsa-miR-5001-5p	NM_001346897	EGFR	AGGGCTGGACTCAGCGGCGGAGCT#GGCGTCCGCCCGAGTCCCCGCCTC#.((((.((((((.(.(((((((((#))).)))))))))))))..)))).	148	172	0.846154	-31.2	0	0.0068622	0.235	-0.57813	-0.155305	-7.71886	20	24	13	5UTR		0	0
hsa-miR-5002-5p	NM_001346897	EGFR	AATTTGGTTTCTGAGGCACTTAGT#GCTGGGTGCGGAAGAGAAAGAATA#.((((..(((((...(((((((((#)))))))))...)))))..)))).	2708	2732	1	-19.9	0	0.146073	0.471	3.79812	5.73562	-10.1194	18	24	9	CDS		0	0
hsa-miR-5002-3p	NM_001346897	EGFR	TGACTGCCTCACTGACCACTT#TGGTCAGTTTTCTCTTGCAGTCGT#(((((((...((((((((...#))))))))........))))))).	1424	1448	0.923077	-19.7	1	0.029259	0.529	3.32386	3.29058	-8.55011	15	24	8	CDS		0	0
hsa-miR-5002-3p	NM_001346897	EGFR	TGACTGCCTCACTGACCACTT#AGGATGTTCAATAACTGTGAGGTGGTCC#.(((((((((((.........#.))))))))))).	417	445	1	-18.9	1	0.000470363	0.544	3.08889	3.06131	-6.90779	11	13	11	CDS		0	0
hsa-miR-5004-5p	NM_001346897	EGFR	TGAGGACAGGGCAAATTCACGA#GATTTGATCCCTGTTCTCT#.((((((((((((((((.....#))))))..)))))))))).	3744	3763	1	-20.5	1	0.058243	0.544	-0.260227	-0.214304	-3.79332	16	19	10	3UTR		0	0
hsa-miR-5004-3p	NM_001346897	EGFR	CTTGGATTTTCCTGGGCCTCAG#CTGGGGTGCAGGAGAGGAGAACTGCCAGA#.((((.((((((((.(((((((#))))))).))))))))........)))).	722	751	0.923077	-23.7	0	0.00748955	0.441	2.0057	3.49498	-6.42973	19	29	8	CDS		0	0
hsa-miR-5006-5p	NM_001346897	EGFR	TTGCCAGGGCAGGAGGTGGAA#TCCATCAGTGGCGATCTCCACATCCTGCCGGTGGCAT#.(((((.(((((((.(((((.#.))))).)))))))..))))).	1215	1252	0.923077	-31.1	0	0.000170674	0.441	3.69673	3.30853	-6.07246	17	22	7	CDS		0	0
hsa-miR-5006-5p	NM_001346897	EGFR	TTGCCAGGGCAGGAGGTGGAA#CCTCCTCTTGCTGCTGGTGGT#((((((((((((((((.((..#)).))))))))).))))))).	2084	2105	0.923077	-26.5	1	0.000115396	0.338	2.1629	2.18823	-3.93757	18	21	9	CDS		0	0
hsa-miR-5006-3p	NM_001346897	EGFR	TTTCCCTTTCCATCCTGGCAG#CTGCTGGGGTGCAGGAGAGGAGAAC#.((((((((((((((((((((#))))))))))...))))))).))).	719	744	1	-25.9	1	0.00163469	0.456	3.2095	3.299	-3.79332	20	25	10	CDS		0	0
hsa-miR-5007-5p	NM_001346897	EGFR	TAGAGTCTGGCTGATATGGTTT#GCCCGGCGAGTCGGGCTCTGG#((((((((((((.....(((..#))).....)))))))))))).	316	337	1	-20.6	1	2.04e-05	0.368	-0.315534	1.28274	-7.05204	15	21	12	CDS		0	0
hsa-miR-5008-5p	NM_001346897	EGFR	TGAGGCCCTTGGGGCACAGTGG#CCATGCCTTGTGCTCCCCCGAGGGCTGCT#.(.((((((((((((((((.((#.))))))))...)))))))))).).	1643	1672	0.923077	-28.6	0	5.88e-06	0.279	2.25549	2.0024	-5.35086	19	25	10	CDS		0	0
hsa-miR-5008-5p	NM_001346897	EGFR	TGAGGCCCTTGGGGCACAGTGG#CCACGTACCAGATGGATGTGAACCCCGAGGGCA#....((((((((((((((((((#))))............))))..)))))))))).	943	976	1	-27.6	0	5.34e-05	0.426	3.94572	4.12358	-9.54656	18	33	10	CDS		0	0
hsa-miR-5008-3p	NM_001346897	EGFR	CCTGTGCTCCCAGGGCCTCGC#GCTCCCCCGAGGGCTGCTGGGGCCCGGAGCCCAGGG#((((.(((((..(((((((((#.)).)))))))))))).)))).	1654	1690	0.923077	-31.4	0	1.64e-06	0.294	2.88965	2.0897	-14.2282	18	22	12	CDS		0	1
hsa-miR-5008-3p	NM_001346897	EGFR	CCTGTGCTCCCAGGGCCTCGC#GTGAGGTGGTCCTTGGGAATTTGGAAATTACCTATGTGCAGAGGA#(((.(((((((((((((((((#))))))....))))))))...................))).))).	433	478	0.923077	-27.7	0	0.000506968	0.618	4.15573	3.47765	-6.9696	20	45	8	CDS		0	1
hsa-miR-5009-5p	NM_001346897	EGFR	TTGGACTTTTTCAGATTTGGGGAT#ATCCAAACTGCACCTACGGATGCACTGGGCCAGGTCTTGAAGGCTGTCCAAC#((((((.(((((((((((((....#.)))))))).)))))..)))))).	1987	2039	0.846154	-21.1	0	0.00445022	0.412	3.44699	2.41288	-5.48126	19	24	8	CDS		0	0
hsa-miR-5010-5p	NM_001346897	EGFR	AGGGGGATGGCAGAGCAAAATT#GCGCTGCCGTGGCAAGTCCCCCA#.((((((((((((.((......#)).))))).......))))))).	788	811	0.846154	-25.4	1	3.23e-05	0.324	3.41391	4.32607	-4.65016	14	23	7	CDS		0	0
hsa-miR-5011-3p	NM_001346897	EGFR	GTGCATGGCTGTATATATAACA#TGTTCATGATGTGTGTACATCTGTGTATG#((((((((.((((((((((.((#.)).)))))))))).)))))))).	3686	3715	0.923077	-18.6	1	0.00144787	0.588	-0.7386	-0.380064	-4.99396	20	24	10	3UTR		0	0
hsa-miR-5087	NM_001346897	EGFR	GGGTTTGTAGCTTTGCTGGCATG#TGCAGCGATACAGCTCAGACCCC#(((((((.(((((((((.(((..#))))))))...))))))))))).	3322	3345	1	-23.6	1	0.0503723	0.456	4.06875	2.0701	-6.25121	19	23	11	CDS		0	0
hsa-miR-5088-5p	NM_001346897	EGFR	CAGGGCTCAGGGATTGGATGGAGG#CCTCCATCCTGGAGAAAGGAGAACGCCTCCCTCAGCCA#...((((.(((((..(((((((((#)))))))))..................))))).)))).	2896	2934	0.923077	-28.9	0	0.0281052	0.485	1.53638	5.4538	-10.4205	18	38	9	CDS		0	1
hsa-miR-5088-5p	NM_001346897	EGFR	CAGGGCTCAGGGATTGGATGGAGG#CCTCCACGTCACGGACTCCCCTCCTGAGCTCTC#.(((((((((((...(((((((((#))))))..........)))..))))))))))).	3205	3238	1	-28.3	1	0.0308324	0.382	3.28375	3.08036	-6.67474	20	33	11	CDS		0	1
hsa-miR-5088-5p	NM_001346897	EGFR	CAGGGCTCAGGGATTGGATGGAGG#CTCCGTCCAGTATTGATCGGGAGAGCCGGAGCGAGCTCTT#.(((((((..(((((((((((((.#)))))))))))..............)).....))))))).	209	249	0.923077	-25.9	1	0.000109334	0.338	-0.248772	-0.208715	-6.09222	20	40	11	5UTR		0	1
hsa-miR-5088-3p	NM_001346897	EGFR	TCCCTTCTTCCTGGGCCCTCA#GAGGGCTGCTGGGGCCCGGAGCCCAGGGAC#(((((..((((.(((((((..#.)))))))))))...))))).	1662	1692	0.923077	-26.6	0	8.6e-06	0.279	5.26343	1.96098	-10.729	16	21	11	CDS		0	0
hsa-miR-5088-3p	NM_001346897	EGFR	TCCCTTCTTCCTGGGCCCTCA#GAGGCTGCTGCAGGAGAGGGAG#((((((..((((((((((((.#))))..))).))))))))))).	2165	2187	0.961538	-24.6	0	0.000150553	0.353	4.21126	4.09074	-7.7949	18	22	11	CDS		0	0
hsa-miR-5089-5p	NM_001346897	EGFR	GTGGGATTTCTGAGTAGCATC#GATACAGCTCAGACCCCACA#(((((...(((((((......#.))))))).))))).	3328	3348	0.923077	-19.6	0	0.0434702	0.441	5.06541	2.01246	-9.9289	12	15	7	CDS		0	0
hsa-miR-5089-5p	NM_001346897	EGFR	GTGGGATTTCTGAGTAGCATC#GCTGCAAAGCTGTCCCATC#(((((((..((..(((((...#)))))..))..))))))).	3287	3306	0.846154	-19.4	1	7.51e-07	0.515	1.31785	2.6811	-11.9435	14	19	7	CDS		0	0
hsa-miR-5089-3p	NM_001346897	EGFR	ATGCTACTCGGAAATCCCACTGA#TCAGTGGCGATCTCCACATCCTGCCGGTGGCATT#((((((((.(((.((((((((((#))))))).))).)))..........)))))))).	1219	1253	0.923077	-23.7	1	0.000183661	0.441	4.83933	2.96317	-6.28309	21	34	8	CDS		0	0
hsa-miR-5089-3p	NM_001346897	EGFR	ATGCTACTCGGAAATCCCACTGA#TTTGTGGAGAACTCTGAGTGCATA#((((.(((((((..((((((.((#)).)))).))..))))))))))).	1770	1794	0.846154	-20.2	0	3.51e-05	0.412	0.568298	3.36905	-10.2026	19	24	11	CDS		0	0
hsa-miR-5090	NM_001346897	EGFR	CCGGGGCAGATTGGTGTAGGGTG#CGCTCTGCCCGGCGAGTCGGGCTCTGGA#(((((((.((((.((((((((((#))))))))...)).))))..))))))).	310	338	0.923077	-27.4	1	2.88e-05	0.382	-0.358329	1.29679	-7.54034	21	28	8	CDS		0	0
hsa-miR-5090	NM_001346897	EGFR	CCGGGGCAGATTGGTGTAGGGTG#CATCTGTGCCCAGCAGTGCTCCGGG#((((((((..((((.((((((((#))))).)))))))...)))))))).	764	789	1	-24.9	1	7.05e-05	0.397	4.72897	3.48479	-6.97192	20	25	8	CDS		0	0
hsa-miR-5091	NM_001346897	EGFR	ACGGAGACGACAAGACTGTGCTG#GCACAAGCTCTTTGTTGTGTCTGG#.((((.(((((((((((((((..#))))).).)))).))))).)))).	3573	3597	0.846154	-22.6	0	0.0222635	0.529	-0.987198	-0.510772	-5.69428	19	24	5	3UTR		0	0
hsa-miR-5093	NM_001346897	EGFR	AGGAAATGAGGCTGGCTAGGAGC#GCAGCAGCCAGTCTCCAGTGTCCA#.(((...((((((((((.(..((#))..))))))))))).....))).	3450	3474	0.846154	-23.2	0	0.113374	0.382	-0.103592	-0.823461	-11.357	16	24	11	CDS		0	1
hsa-miR-5094	NM_001346897	EGFR	AATCAGTGAATGCCTTGAACCT#GGATATTCTGAAAACCGTAAAGGAAATCACAGGGTTTTTGCTGATTC#((((((((((.((((((.....#.)))))).)))))))))).	1301	1348	1	-18.6	1	0.000164027	0.529	3.63574	3.53594	-6.76235	16	19	10	CDS		0	0
hsa-miR-5187-5p	NM_001346897	EGFR	TGGGATGAGGGATTGAAGTGGA#CCGACGAGTACCTCATCCCAC#((((((((((..(((...(((.#))).)))...)))))))))).	3163	3184	0.846154	-22.5	1	0.0174104	0.368	4.47656	3.79931	-10.3422	16	21	10	CDS		0	0
hsa-miR-5189-5p	NM_001346897	EGFR	TCTGGGCACAGGCGGATGGACAGG#CCTGTGCCATCCAAACTGCACCTACGGATGCACTGGGCCAGGT#(((((.(.((((((((((((((((#))))).)))))).................)).)))).))))).	1979	2022	1	-28.9	0	5.05e-05	0.441	3.20437	2.30795	-8.15217	22	43	6	CDS		0	0
hsa-miR-5189-5p	NM_001346897	EGFR	TCTGGGCACAGGCGGATGGACAGG#CCGGCGGCCGCCGCCGCCCAGAC#(((((((...(((((.(((...((#)).....))))))))))))))).	104	127	0.923077	-26.7	1	0.000655241	0.206	0.437921	-0.346689	-8.78315	17	23	15	5UTR		0	0
hsa-miR-5189-3p	NM_001346897	EGFR	TGCCAACCGTCAGAGCCCAGA#CTGGGCTCCGGTGCGTTCGGCAC#(((((((((((.((((((((.#)))))))).)))).))).)))).	2277	2300	0.846154	-26.5	1	1.47e-07	0.456	5.45449	5.70594	-7.28438	19	23	8	CDS		0	0
hsa-miR-5193	NM_001346897	EGFR	TCCTCCTCTACCTCATCCCAGT#GCTGGGGTGCAGGAGAGGAGA#..(((((((.((((((((((((#))))))))).)))))))))).	721	742	1	-32.2	1	0.00128743	0.456	4.72151	3.73413	-6.19951	19	21	10	CDS		0	0
hsa-miR-5194	NM_001346897	EGFR	TGAGGGGTTTGGAATGGGATGG#TCATCCCACAGCAGGGCTTCTTCAGCAGCCCCTCC#.((((((((..(((((((((((#))))))))............)))...)))))))).	3175	3210	0.846154	-23.9	1	0.00471668	0.382	4.60327	3.65491	-7.86061	19	35	8	CDS		0	0
hsa-miR-5194	NM_001346897	EGFR	TGAGGGGTTTGGAATGGGATGG#GTCCTGCTCCTCAACCTCCTCGA#(((((((((.(((.((((((..#)))))).)))..)))).))))).	3419	3442	0.923077	-22	1	0.0688159	0.412	-1.08733	0.625243	-6.03692	18	23	6	CDS		0	0
hsa-miR-5195-5p	NM_001346897	EGFR	AACCCCTAAGGCAACTGGATGG#CCATCAGTGGCGATCTCCACATCCTGCCGGTGGCATTTAGGGGTG#.(((((((((((.(((((..((#.))..))))).)).))))))))).	1216	1261	1	-25	1	2.96e-06	0.441	2.03899	3.21418	-5.08246	18	24	9	CDS		0	0
hsa-miR-5195-3p	NM_001346897	EGFR	ATCCAGTTCTCTGAGGGGGCT#GGCCCCCGGGAGAGCG#.....(((((((..(((((((#))))))).))))))).	849	865	0.846154	-25.7	0	0.00063624	0.338	3.20574	4.21287	-15.8116	14	16	7	CDS		0	0
hsa-miR-5195-3p	NM_001346897	EGFR	ATCCAGTTCTCTGAGGGGGCT#CCTCCTCTGGATCCACAGGAACTGGATA#(((((((((((((((((((..#))))))).))).......))))))))).	1278	1306	1	-24.7	1	0.00121444	0.544	2.75722	3.35874	-3.93757	19	28	9	CDS		0	0
hsa-miR-5196-3p	NM_001346897	EGFR	TCATCCTCGTCTCCCTCCCAG#CTGGGGTGCAGGAGAGGAGA#.....(((.((((((((((((#)))))).)..))))).))).	722	742	0.846154	-21.3	0	0.00128743	0.456	3.921	3.53618	-14.722	15	20	6	CDS		0	0
hsa-miR-4524b-3p	NM_001346897	EGFR	GAGACAGGTTCATGCTGCTA#AGCAGCAGCCAGTCTCC#(((((.(((...(((((((.#)))))))))).))))).	3449	3466	0.923077	-21.9	0	0.019173	0.368	-0.0142948	-0.499392	-13.2526	15	17	10	CDS		0	0
hsa-miR-5571-5p	NM_001346897	EGFR	CAATTCTCAAAGGAGCCTCCC#GAGGTGGTCCTTGGGAATTT#.(((((((.((((((((((..#)))))..)))))))))))).	435	455	0.846154	-19.2	1	5.35e-05	0.588	3.43156	3.03151	-4.84971	17	20	12	CDS		0	0
hsa-miR-5571-3p	NM_001346897	EGFR	GTCCTAGGAGGCTCCTCTG#GGCTGCCTCCTGGACT#((((.(((((((.((....#))..))))))))))).	2511	2527	0.923077	-22.9	0	5.62e-06	0.456	5.2265	4.68962	-9.57879	13	16	11	CDS		0	0
hsa-miR-5100	NM_001346897	EGFR	TTCAGATCCCAGCGGTGCCTCT#GAGGGCTGCTGGGGCCCGGAG#(((.(.((((((((((.((((.#)))))))))))))).).))).	1662	1683	0.923077	-25.7	0	1.56e-08	0.309	7.69347	2.12345	-8.87056	18	21	14	CDS		0	0
hsa-miR-5100	NM_001346897	EGFR	TTCAGATCCCAGCGGTGCCTCT#GCCTGCTGGGCATCTGC#..(((((((((((((.((....#)))))))))).))))).	2452	2469	0.846154	-24.1	1	4.46e-05	0.338	5.3307	5.36366	-5.19005	15	17	10	CDS		0	0
hsa-miR-5572	NM_001346897	EGFR	GTTGGGGTGCAGGGGTCTGCT#AGCTCAGACCCCACAGGCGCCTTGACT#((((((((((.((((((((((#)))..)))))))....)))))))))).	3333	3360	0.846154	-28	1	0.00637676	0.412	4.23953	2.13799	-6.76235	20	27	10	CDS		0	0
hsa-miR-548as-5p	NM_001346897	EGFR	AAAAGTAATTGCGGGTTTTGCC#GGAAAACCTGCAG#.........((((((((((.((#)))))))))))).	563	576	0.846154	-15.5	0	0.00827619	0.588	4.23179	3.2267	-20.4803	12	13	12	CDS		0	0
hsa-miR-664b-5p	NM_001346897	EGFR	TGGGCTAAGGGAGATGATTGGGTA#GCCCAAAGTTCCGTGAGTTGATCATCGAATTCTCCAAAATGGCCCGA#(((((((..((((((((((((((.#)))))..................))))...)))))....))))))).	2998	3045	0.807692	-23.4	1	0.040329	0.471	4.10311	6.18841	-7.3076	21	47	7	CDS		0	0
hsa-miR-5580-5p	NM_001346897	EGFR	TGCTGGCTCATTTCATATGTGT#GCATTGATAGAAATGGGCTGCAA#(((.((((((((((((..((((#))))..)).))))))))))))).	3271	3294	1	-18.9	0	0.0125963	0.529	2.36284	2.77582	-6.9696	19	23	13	CDS		0	1
hsa-miR-5580-3p	NM_001346897	EGFR	CACATATGAAGTGAGCCAGCAC#GTTCTCTCTGCTGGCTCTATCTTGACCTGTGA#((((..(.(((.(((((((((.#.)))))))))...))).)..)))).	3756	3788	0.923077	-23.6	0	0.00623947	0.647	-0.172601	-0.162459	-15.618	17	25	9	3UTR		0	0
hsa-miR-5581-5p	NM_001346897	EGFR	AGCCTTCCAGGAGAAATGGAGA#CTTCTGGAGGGTG#.((((((((((((.........#)))))))))))).	1746	1759	0.923077	-20.3	1	0.000124759	0.441	3.47111	2.66786	-5.61866	12	13	12	CDS		0	0
hsa-miR-5581-3p	NM_001346897	EGFR	TTCCATGCCTCCTAGAAGTTCC#GGAGCTGCTGGGGTGCAGGAGA#((((.(((.((((((.((((((#)))))).)))))).))))))).	715	737	0.846154	-24.8	0	0.000127159	0.456	2.97593	3.0694	-9.34605	19	22	7	CDS		0	0
hsa-miR-5582-3p	NM_001346897	EGFR	TAAAACTTTAAGTGTGCCTAGG#TTGGGCACTTTTGAAGA#.....(((((((.((((((((.#)))))))).))))))).	381	398	0.846154	-17.7	0	0.00049662	0.529	2.13605	2.90962	-14.9547	15	17	8	CDS		0	0
hsa-miR-5584-3p	NM_001346897	EGFR	TAGTTCTTCCCTTTGCCCAATT#GGGTGCAGGAGAGGAGAACTGC#((((((((((((.(((((....#))))).)))...))))))))).	725	747	0.846154	-20.2	1	0.00385444	0.441	2.57705	3.40531	-5.22671	17	22	9	CDS		0	0
hsa-miR-5584-3p	NM_001346897	EGFR	TAGTTCTTCCCTTTGCCCAATT#TGGTGTGTGCAGATCGCAAAGGGCATGAACTAC#((((((.(((((((((......#.)))))))).).)))))).	2574	2607	1	-19.7	0	0.0168373	0.426	6.63419	5.22155	-5.48126	15	19	8	CDS		0	0
hsa-miR-5585-5p	NM_001346897	EGFR	TGAAGTACCAGCTACTCGAGAG#GGTGGCTGGTTATGTCC#.((...((((((((((......#))))))))))....)).	512	529	0.846154	-16.5	0	0.000879982	0.5	4.87784	3.04246	-12.8453	12	17	10	CDS		0	1
hsa-miR-5585-3p	NM_001346897	EGFR	CTGAATAGCTGGGACTACAGGT#ATCTGTGCCCAGCA#.......((((((.(.((((((#))))))))))))).	765	779	0.846154	-18.3	0	0.000982477	0.397	5.31917	3.56022	-18.2001	13	14	13	CDS		0	1
hsa-miR-5586-5p	NM_001346897	EGFR	TATCCAGCTTGTTACTATATGC#AGTAACAAGCTC#.....(((((((((((......#))))))))))).	363	375	0.846154	-15.5	0	6.95e-05	0.559	2.40431	1.79174	-13.6656	11	12	11	CDS		0	0
hsa-miR-5586-3p	NM_001346897	EGFR	CAGAGTGACAAGCTGGTTAAAG#GCTGGCTGCGCTCTGC#(((((((.(.(((((((.....#))))))))))))))).	302	318	0.846154	-18.3	1	1.07e-07	0.279	0.743118	0.593917	-7.49372	15	16	15	CDS		0	0
hsa-miR-5586-3p	NM_001346897	EGFR	CAGAGTGACAAGCTGGTTAAAG#GCTACCTTGTCATTCA#..((((((((((.((((.....#)))).)))))))))).	3055	3071	0.884615	-17.6	1	0.136086	0.471	4.75631	4.50373	-6.24613	14	16	10	CDS		0	0
hsa-miR-5587-5p	NM_001346897	EGFR	ATGGTCACCTCCGGGACT#AGACCATCCAGGAGGTGGCTG#..((((((((((.(((..#.))).)))))))))).	499	520	0.923077	-23	1	2.79e-06	0.529	4.47223	3.24259	-6.24613	13	16	10	CDS		0	0
hsa-miR-5587-5p	NM_001346897	EGFR	ATGGTCACCTCCGGGACT#AGTTCCGTGAGTTGATCATC#(((((((.((((((((((#))))))).))).))))))).	3004	3024	0.846154	-21.2	1	0.000616739	0.471	5.09749	5.95016	-6.25121	17	20	7	CDS		0	0
hsa-miR-5587-5p	NM_001346897	EGFR	ATGGTCACCTCCGGGACT#TTCTGGAGGGTGAGCCAA#.(((((((((((((((..#))))))))).))).))).	1747	1765	1	-20.3	1	0.000521374	0.485	3.72502	2.89229	-3.79332	15	18	9	CDS		0	0
hsa-miR-5587-3p	NM_001346897	EGFR	GCCCCGGGCAGTGTGATCATC#CGCTCTGCCCGGCGAGTCGGGCT#(((((((((((.(((......#))).)))))))).......))).	310	333	0.846154	-24.2	1	8.59e-08	0.353	-0.446585	1.40088	-7.51743	14	23	8	CDS		0	0
hsa-miR-548au-3p	NM_001346897	EGFR	TGGCAGTTACTTTTGCACCAG#GGTGCAGGAGAGGAGAACTGCCAG#((((((((.((((((((((..#)))))))))).....)))))))).	726	750	0.961538	-26.5	1	0.00730855	0.456	3.52572	3.64462	-4.99396	18	24	10	CDS		0	0
hsa-miR-1295b-5p	NM_001346897	EGFR	CACCCAGATCTGCGGCCTAAT#TTGGGCTGGCCAAACTGCTGGGTGC#(((((((.....((((((((.#)))))))).........))))))).	2692	2717	0.923077	-22.2	1	0.000464797	0.5	5.61854	5.09165	-14.7217	15	25	8	CDS		0	0
hsa-miR-5589-5p	NM_001346897	EGFR	GGCTGGGTGCTCTTGTGCAGT#ACTGCACCTACGGATGCACTGGGCCA#((((.((((((((.(((((((#)))))))....))).))))).)))).	1993	2019	0.923077	-28.8	0	0.00259453	0.412	1.95896	2.06237	-8.91345	19	26	7	CDS		0	0
hsa-miR-5589-5p	NM_001346897	EGFR	GGCTGGGTGCTCTTGTGCAGT#GCTGCACAGGCCCCCGGGAGAGCGACTGCCTGGTCT#(((((((((((((((((((((#))))))))..........)))))....)))))))).	841	877	0.846154	-26.8	1	2.41e-05	0.324	4.66958	3.81124	-3.93757	21	36	8	CDS		0	0
hsa-miR-5589-3p	NM_001346897	EGFR	TGCACATGGCAACCTAGCTCCCA#TGGGAGCTGCTGGGGTGCAGGAGAGGAGAACTGCCAGAAACTGACCAAAATCATCTGTGCC#.((((((((((((((((((((((#))))))))....))))...............)))))...................))))).	713	774	0.923077	-25.6	1	0.0382815	0.412	3.93111	3.06036	-3.79332	22	61	8	CDS		0	0
hsa-miR-5591-5p	NM_001346897	EGFR	TGGGAGCTAAGCTATGGGTAT#ACCCAGTGGAGAAGCTCCCAA#((((((((...((((((((..#))))).)))...)))))))).	2204	2225	0.923077	-24.5	1	4.09e-05	0.485	5.40435	4.64272	-9.06125	16	21	8	CDS		0	0
hsa-miR-5680	NM_001346897	EGFR	GAGAAATGCTGGACTAATCTGC#GTCCAGTATTGATCG#((..((((((((((........#))))))))))..)).	213	228	0.846154	-18.3	0	0.0102158	0.309	-0.498016	-0.136389	-9.49563	12	15	10	5UTR		0	0
hsa-miR-5681a	NM_001346897	EGFR	AGAAAGGGTGGCAATACCTCTT#TGCCACCCA#.....((((((((.........#)))))))).	1797	1806	0.846154	-17.4	0	0.00355004	0.456	3.80195	2.78302	-15.4909	8	9	8	CDS		0	0
hsa-miR-5683	NM_001346897	EGFR	TACAGATGCAGATTCTCTGACTTC#GGAGCCCAGGGACTGCGTCTC#...((((((((..((((((.((((#))))..)))))))))))))).	1679	1700	0.846154	-20.4	0	2.56e-05	0.309	4.01185	3.31129	-11.1505	18	21	14	CDS		0	0
hsa-miR-548ax	NM_001346897	EGFR	AGAAGTAATTGCGGTTTTGCCA#GGCAGGACCAAGCAACATGGTCA#.((.....(((((((((((((.#)))))))))..)))).....)).	1407	1430	0.923077	-18.7	0	0.00404948	0.5	4.91834	2.84862	-16.7027	15	23	9	CDS		0	1
hsa-miR-5685	NM_001346897	EGFR	ACAGCCCAGCAGTTATCACGGG#CCCAATGGGAGCTGCTGGGGTGC#.((.((((((((((.(((.(((#)))..))).)))))))))).)).	708	731	0.846154	-27.3	0	5.55e-06	0.426	4.70078	3.20493	-7.5608	18	23	10	CDS		0	0
hsa-miR-5690	NM_001346897	EGFR	TCAGCTACTACCTCTATTAGG#CCATCCAGGAGGTGGCTGGTTA#(((((((((.(((........#.))).))))))))).	502	524	0.923077	-16.4	1	3.66e-06	0.5	5.08406	3.16071	-7.00542	12	15	9	CDS		0	0
hsa-miR-5691	NM_001346897	EGFR	TTGCTCTGAGCTCCGAGAAAGC#GTGATGTCTGGAGCTACGGGGTGAC#((((((((((((((.(((....#.))))))))).)))))))).	2809	2834	0.961538	-21.5	1	0.00038138	0.485	6.76139	5.48396	-4.67302	17	20	9	CDS		0	0
hsa-miR-5691	NM_001346897	EGFR	TTGCTCTGAGCTCCGAGAAAGC#TTGATCGGGAGAGCCGGAGCGAG#((((((((.(((((((..((..#))..))))...))))))))))).	221	244	0.846154	-20.4	1	6.12e-08	0.353	-0.660469	-0.15308	-4.99396	17	23	11	5UTR		0	0
hsa-miR-5693	NM_001346897	EGFR	GCAGTGGCTCTGAAATGAACTC#CGGAGCCCAGGGACTGCG#((((((((((((..........#))))))).....))))).	1678	1696	0.846154	-18.7	1	5.92e-05	0.265	2.74758	2.27932	-7.05204	12	18	7	CDS		0	0
hsa-miR-5696	NM_001346897	EGFR	CTCATTTAAGTAGTCTGATGCC#GGCATGAACTACTTGGAGGAC#.((.((((((((((.(.(((((#))))).))))))))))).)).	2595	2616	0.846154	-18.6	0	0.0145983	0.397	5.19526	5.32426	-7.5608	18	21	11	CDS		0	0
hsa-miR-5697	NM_001346897	EGFR	TCAAGTAGTTTCATGATAAAGG#CATGAACTACTTGGA#((((((((.((((((.......#)))))))))))))).	2597	2612	0.923077	-16.5	1	0.0104874	0.397	4.09412	5.19963	-5.22701	14	15	14	CDS		0	0
hsa-miR-5698	NM_001346897	EGFR	TGGGGGAGTGCAGTGATTGTGG#CCACAACCAGTGTGCTGCAGGCTGCACAGGCCCCCGG#((((((.(((((((..((((((#))))))..............)))))))...)))))).	821	858	0.846154	-27.1	0	0.000115684	0.353	6.89571	4.04417	-6.44976	19	37	7	CDS		0	0
hsa-miR-5698	NM_001346897	EGFR	TGGGGGAGTGCAGTGATTGTGG#CCACAGGCCAGGTCTGCCATGCCTTGTGCTCCCCCGA#(((((((((((((((.((((((#))))))..)).............))))))))))))).	1627	1664	0.846154	-27	1	5.36e-05	0.265	1.86025	2.58522	-4.17062	21	37	13	CDS		0	0
hsa-miR-5699-3p	NM_001346897	EGFR	TCCTGTCTTTCCTTGTTGGAGC#GCTGTCCCATCAAGGAAGACAGC#..(((((.(((((((.((((((#)))...))).)))))))))))).	3295	3318	1	-21.8	0	0.000512926	0.471	2.92813	2.25071	-7.50368	18	23	12	CDS		0	0
hsa-miR-5699-3p	NM_001346897	EGFR	TCCTGTCTTTCCTTGTTGGAGC#CTCCAGCATCTCCAGAGGGGGAAACAGTGGCAGA#..(((((((((((((((((((.#))))))))..........))))))....))))).	3487	3521	0.910256	-20.7	1	0.00103524	0.426	-0.712527	-0.682362	-4.957	19	34	8	CDS		0	0
hsa-miR-5702	NM_001346897	EGFR	TGAGTCAGCAACATATCCCATG#GGATATTCTGAAAACCGTAAAGGAAATCACAGGGTTTTTGCTGATTCAG#(((((((((((.....(((.((#.)))))...))))))))))).	1301	1350	0.961538	-19.6	1	0.000917778	0.529	3.26661	3.4284	-10.3988	16	21	11	CDS		0	0
hsa-miR-5704	NM_001346897	EGFR	TTAGGCCATCATCCCATTATGC#GCCACTGGGATGGTGGGGGCCC#...(((((((((((((......#.)))))))))...)))).	2064	2086	0.846154	-20.7	0	4.71e-06	0.324	3.99036	1.96826	-6.51454	13	18	9	CDS		0	0
hsa-miR-5705	NM_001346897	EGFR	TGTTTCGGGGCTCATGGCCTGTG#GGGCTGCTGGGGCCCGGAGCC#.((((((((.((((((((((...#)))))).)))).)))))))).	1664	1685	0.826923	-28	1	1.49e-08	0.309	6.50265	1.93164	-5.03583	18	21	8	CDS		0	0
hsa-miR-5705	NM_001346897	EGFR	TGTTTCGGGGCTCATGGCCTGTG#GCGGCCGGAGTCCCGAGC#...((((((((((.(((((.((.#))))))))))))))))).	81	99	0.846154	-27.6	0	7.39e-07	0.162	0.0627843	-0.116361	-7.37138	17	18	17	5UTR		0	0
hsa-miR-5739	NM_001346897	EGFR	GCGGAGAGAGAATGGGGAGC#GTGACAGATTTGATCCCTGTTCTCTCTGCTGG#.(((((((((((((((((..#.)))))))))))))).))).	3738	3770	0.846154	-26.3	1	0.00353509	0.588	-0.28619	-0.276373	-3.79332	17	20	14	3UTR		0	0
hsa-miR-5739	NM_001346897	EGFR	GCGGAGAGAGAATGGGGAGC#CTCCCCTCCTGAGCTCTCTGA#.(((((((.....((((((.#)))))).......))))))).	3220	3241	1	-22	1	0.0051731	0.382	2.98524	3.00666	-13.5529	13	21	7	CDS		0	0
hsa-miR-5787	NM_001346897	EGFR	GGGCTGGGGCGCGGGGAGGT#ACCTCCACCGTGCAGCTCATCACGCAGCTCA#((((((.(((((((((((((#)))))).)))))).........).)))))).	2472	2503	0.846154	-31.5	0	0.00139238	0.382	4.39864	5.13722	-5.48126	19	31	6	CDS		0	0
hsa-miR-1199-5p	NM_001346897	EGFR	CCTGAGCCCGGGCCGCGCAG#TTGTGCTCCCCCGAGGGCTGCTGGGGCCCGGAGCCCAGGG#((((.(((((((((.(((((#.)))).).))))))).)).)))).	1650	1690	0.846154	-34.9	0	1.64e-06	0.294	3.13902	1.82709	-8.79206	18	24	7	CDS		0	1
hsa-miR-1199-3p	NM_001346897	EGFR	TGCGGCCGGTGCTCAACCTGC#GGCGCAGCGCGGCCGCAG#(((((((.(((((...((...#))...)))))))))))).	19	37	0.846154	-23.9	1	1.08e-05	0.182	0.0564258	-0.20075	-8.07655	14	18	12	5UTR		0	0
hsa-miR-6068	NM_001346897	EGFR	CCTGCGAGTCTCCGGCGGTGG#CCACATCGTTCGGAAGCGCACGCTGCGGAGGCTGCTGCAGGA#(((((((((((((.((((((.#.)))))))))))))..)))))).	2138	2180	1	-30.4	1	4.73e-06	0.368	3.59912	3.36514	-4.79441	19	23	13	CDS		0	0
hsa-miR-6070	NM_001346897	EGFR	CCGGTTCCAGTCCCTGGAG#CCAGGGACTGCGTCTCTTGCCGGA#(((((..((((((((((..#))))))))))........))))).	1684	1708	0.846154	-26.9	0	0.00123065	0.309	2.8634	2.88144	-7.38222	15	24	10	CDS		0	0
hsa-miR-6072	NM_001346897	EGFR	TCCTCATCACACTGCACCTTAG#CTGGGGTGCAGGAGAGGAG#(((((.((...(((((((((((#)))))))))))))))))).	722	741	1	-24.8	0	0.000681535	0.456	4.11766	3.54399	-10.9622	18	19	18	CDS		0	0
hsa-miR-6073	NM_001346897	EGFR	GGTAGTGAGTTATCAGCTAC#GTGGCTGGTTATGTCCTCATTGCCC#(((((((((..(((((((((#)))))))))......))))))))).	513	538	1	-23.1	1	0.00279705	0.485	4.40121	3.11621	-8.00486	18	25	9	CDS		0	0
hsa-miR-6074	NM_001346897	EGFR	GATATTCAGAGGCTAGGTGG#CTACCGTGCCCTGAT#.....((((.(((..(((((#)))))..))))))).	3116	3131	0.923077	-18.1	0	0.0118765	0.456	3.39569	4.70155	-16.5004	12	15	7	CDS		0	0
hsa-miR-6074	NM_001346897	EGFR	GATATTCAGAGGCTAGGTGG#CCACGTCACGGACTCCCCTCCTGAGCTCTCTGAGTGCA#(.(((((((((((((((.((#.)).))).))).)))))))))).	3208	3246	0.923077	-22	1	8.38e-05	0.426	3.03353	3.44529	-5.10125	18	23	10	CDS		0	0
hsa-miR-6075	NM_001346897	EGFR	ACGGCCCAGGCGGCATTGGTG#CACCTGTGCCATCCAAACTGCACCTACGGATGCACTGGGCCA#..((((((((((((((.((((#)))).))))).....................)).))))))).	1977	2019	0.846154	-28.8	1	0.00259453	0.412	3.31314	2.21488	-4.957	18	42	7	CDS		0	0
hsa-miR-6076	NM_001346897	EGFR	AGCATGACAGAGGAGAGGTGG#CTGCCTCACCTCCACCGTGCA#.(((((...((((.(((((((#))))))).))))...))))).	2465	2486	0.846154	-22.7	0	0.00321747	0.338	6.36326	5.09909	-9.56388	16	21	7	CDS		0	0
hsa-miR-6076	NM_001346897	EGFR	AGCATGACAGAGGAGAGGTGG#CACCTTCCTCCCAGTGCC#.((((....(((((.(((((.#))))))))))...)))).	3377	3395	1	-19.7	0	0.0308381	0.441	0.500996	1.80368	-11.3434	14	18	10	CDS		0	0
hsa-miR-6084	NM_001346897	EGFR	TTCCGCCAGTCGGTGGCCGG#CTGGCCAAACTGCTGGGTGCGGAAG#(((((((((.((((((((((#))))))..)))))))...)))))).	2697	2722	0.884615	-25.1	1	0.000218345	0.5	4.6368	5.57962	-5.18008	19	25	7	CDS		0	0
hsa-miR-6085	NM_001346897	EGFR	AAGGGGCTGGGGGAGCACA#GTGCTCCCTCCAGCATCTCCA#..((((((((((((((((.#)))))))).)))))...))).	3480	3501	0.846154	-29.4	1	3e-05	0.412	-1.16418	-0.598878	-4.957	16	21	8	CDS		0	0
hsa-miR-6085	NM_001346897	EGFR	AAGGGGCTGGGGGAGCACA#CTCCCTCAGCCACCC#..(((((((((((((....#))))))))))).)).	2922	2937	0.923077	-25.7	1	0.0255432	0.5	4.57435	5.88813	-5.19005	13	15	11	CDS		0	0
hsa-miR-6086	NM_001346897	EGFR	GGAGGTTGGGAAGGGCAGAG#CTGCTCCTCAACCTCCT#((((((((((..((((((..#)))))))))))))))).	3422	3439	0.923077	-26.5	1	0.0288919	0.412	-0.77991	0.631648	-10.1092	16	17	16	CDS		0	0
hsa-miR-6086	NM_001346897	EGFR	GGAGGTTGGGAAGGGCAGAG#CTCATCACGCAGCTCATGCCCTTCGGCTGCCTCCT#((((((...(((((((((((#.))).))))))))....)))))).	2487	2522	0.846154	-29.4	0	2.4e-05	0.441	4.33762	4.92502	-8.85129	17	24	8	CDS		0	0
hsa-miR-6088	NM_001346897	EGFR	AGAGATGAAGCGGGGGGGCG#TGCTCCCCCGAGGGCTGCTGGGGCCCGGAGCCCAGGGACTGCGTCTCTT#(((((((.((((((((((((#))))))))))............................)).))))))).	1653	1702	0.846154	-25.7	1	1.1e-05	0.309	3.80185	2.00214	-6.25121	19	49	10	CDS		0	0
hsa-miR-6090	NM_001346897	EGFR	GGGGAGCGAGGGGCGGGGC#GCCATGCCTTGTGCTCCCCC#((((((((.((((((.(((#))).)))))).)))))))).	1642	1662	0.846154	-30.2	1	5.31e-05	0.279	3.51965	2.43855	-5.22701	17	20	8	CDS		0	0
hsa-miR-6124	NM_001346897	EGFR	GGGAAAAGGAAGGGGGAGGA#TCCTGCTCCTCAACCTCCTCGACCCA#(((...(((.(((..(((((#.)))))..))))))...))).	3420	3446	0.846154	-22.3	0	0.246165	0.426	-1.52796	0.98774	-15.8244	14	21	6	CDS		0	0
hsa-miR-6125	NM_001346897	EGFR	GCGGAAGGCGGAGCGGCGGA#CCGTCGCTTGGTGCACCGCG#((((...((.(((((((((.#))))))))).))...)))).	2615	2635	0.923077	-28.9	0	4.54e-05	0.412	3.62709	5.5317	-12.7438	15	20	9	CDS		0	0
hsa-miR-6126	NM_001346897	EGFR	GTGAAGGCCCGGCGGAGA#TCTCCACATCCTGCCGGTGGCATTTAGGGGTGACTCCTTCACA#(((((((((((((((.((#.))))))))).)................))))))).	1229	1272	1	-22.3	1	0.000395666	0.456	2.71011	3.36246	-4.17062	17	36	9	CDS		0	0
hsa-miR-6127	NM_001346897	EGFR	TGAGGGAGTGGGTGGGAGG#CCTGCCCCCCACTCATGCTCT#.(((.(((((((.((((((#))).))))))))))...))).	913	934	0.923077	-24.8	0	0.390642	0.412	1.93128	3.88027	-9.20149	16	21	10	CDS		0	0
hsa-miR-6127	NM_001346897	EGFR	TGAGGGAGTGGGTGGGAGG#CCTCCTCGACCCACTCA#.....((((((((((((((#))))))..)))))))).	3433	3450	0.923077	-24.3	0	0.146641	0.412	-0.54038	0.35241	-13.6656	14	17	8	CDS		0	0
hsa-miR-6127	NM_001346897	EGFR	TGAGGGAGTGGGTGGGAGG#CTCCCAACCAAGCTCTCTTG#.((((((((.((((((((.#)))))).))..)))))))).	2218	2238	0.923077	-24.5	1	0.0026194	0.559	5.16346	5.08748	-5.03583	16	20	8	CDS		0	0
hsa-miR-6128	NM_001346897	EGFR	ACTGGAATTGGAGTCAAAA#TGACTCCGTCCAGTA#((((((..((((((((...#)))))))))))))).	206	221	0.923077	-20.6	0	0.0102711	0.338	-0.248772	-0.311083	-7.7949	14	15	14	5UTR		0	0
hsa-miR-6130	NM_001346897	EGFR	TGAGGGAGTGGATTGTATG#CATAACATCCTTGGGATTACGCTCCCTCAA#((((((((((((((.((..#.)).)))).)))))))))).	1457	1487	0.846154	-21.2	1	1.72e-05	0.574	2.41424	3.49721	-4.67302	16	20	10	CDS		0	0
hsa-miR-6130	NM_001346897	EGFR	TGAGGGAGTGGATTGTATG#ACAGTCCTGCTCCTCAA#(((.((((((((((((...#))))))).)))))))).	3416	3433	0.846154	-19.1	0	0.00888355	0.412	-0.876864	1.02489	-6.9696	15	17	8	CDS		0	0
hsa-miR-6132	NM_001346897	EGFR	AGCAGGGCTGGGGATTGCA#GCGATCTCCACATCCTGCC#.((((((.((((((((((.#))))))))))..)))))).	1225	1244	0.923077	-25.9	1	0.00109476	0.441	3.5412	3.23263	-6.10696	16	19	10	CDS		0	0
hsa-miR-6132	NM_001346897	EGFR	AGCAGGGCTGGGGATTGCA#GCAGTGCTCCGGGCGCTGCC#.((((.((((((((((((.#))))).)))))).).)))).	776	796	0.923077	-24.5	0	4.37e-05	0.353	3.30096	3.89605	-5.69428	16	20	6	CDS		0	0
hsa-miR-6133	NM_001346897	EGFR	TGAGGGAGGAGGTTGGGTA#GCCGCAGCAGCCTCCGCCCC#...(((.(((((((((((.#)))....)))))))).))).	30	50	0.846154	-22.3	0	0.000117917	0.147	0.142898	-0.117473	-8.05823	14	20	8	5UTR		0	0
hsa-miR-6134	NM_001346897	EGFR	TGAGGTGGTAGGATGTAGA#CTGCTCCTCAACCTCCTCGA#(((((.(((((((.((((.#))))))))..))).))))).	3422	3442	0.846154	-20	0	0.0688159	0.412	-1.01787	0.816098	-6.69537	16	20	8	CDS		0	0
hsa-miR-6165	NM_001346897	EGFR	CAGCAGGAGGTGAGGGGAG#CCCTCCTCTTGCTGCTGG#((((((.(((.(((((...#)))))..))).)))))).	2083	2101	0.846154	-24	0	0.005468	0.324	1.62337	2.67262	-8.30604	14	18	6	CDS		0	0
hsa-miR-6499-5p	NM_001346897	EGFR	TCGGGCGCAAGAGCACTGCAGT#TGTGGTGACAGATCACGGCTCGTGCGTCCGAG#(((((((((.((((((((((..#))))))...........)))).))))))))).	1022	1054	0.923077	-26.3	1	2.81e-05	0.426	4.70342	4.24109	-5.18008	19	32	9	CDS		0	0
hsa-miR-6499-5p	NM_001346897	EGFR	TCGGGCGCAAGAGCACTGCAGT#GCTGCAGGCTGCACAGGCCCCCGGG#(((((.((...(((.(((((((#))))))))))......)).))))).	834	859	0.846154	-25.3	0	0.00014272	0.338	2.83012	3.79518	-11.6977	17	25	10	CDS		0	0
hsa-miR-6499-3p	NM_001346897	EGFR	AGCAGTGTTTGTTTTGCCCACA#GTGGAGCGAATTCCTTTGGAAAACCTGCA#.((((.((((..(((((((((.#)))).)))))..........)))))))).	546	575	0.923077	-18.8	0	0.00636522	0.574	1.26419	4.08539	-11.8659	17	29	8	CDS		0	0
hsa-miR-6500-5p	NM_001346897	EGFR	AGGAGCTATCCACTCCAGGTGTCC#GGAGGCTGCTGCAGGAGAGGGAGCTTGTGGAGCCTCTTACACCCAGTGGAGAAGCTCCC#.((((((.((((((...(((((..#.))))).))))))..)))))).	2164	2223	1	-26.5	1	4.51e-05	0.471	4.10073	4.17087	-7.07546	17	22	6	CDS		0	0
hsa-miR-6500-5p	NM_001346897	EGFR	AGGAGCTATCCACTCCAGGTGTCC#GGACAGCATAGACGACACCTTCCTCCCAGTGCCTGGTGAGTGGCTTGTCTGGAAACAGTCCTGCTCCTC#((((((...(((((((((((((((#))))..........................))))))..)))))...................)))))).	3362	3431	0.846154	-24.2	0	0.00788559	0.397	2.69152	1.30284	-8.85129	21	69	6	CDS		0	0
hsa-miR-6500-3p	NM_001346897	EGFR	ACACTTGTTGGGATGACCTGC#GCAGGGAATGCGTGGACAAGTGC#.((((((((.(.((..(((((#)))))..)).)...)))))))).	1720	1743	0.923077	-21.2	1	0.00198591	0.412	1.78057	2.8915	-9.35113	16	23	8	CDS		0	0
hsa-miR-6500-3p	NM_001346897	EGFR	ACACTTGTTGGGATGACCTGC#GGCGTCCGCAAGTGTA#((((((((..(((((.((...#))))))))))))))).	1089	1105	0.923077	-19.5	1	0.000112623	0.441	4.89255	3.83711	-6.46952	15	16	15	CDS		0	0
hsa-miR-6501-5p	NM_001346897	EGFR	AGTTGCCAGGGCTGCCTTTGGT#GCTGGTGGTGGCCCTGGGGATC#.(((.(((((((((((.(((((#))))).))))))))))).))).	2096	2118	0.923077	-28.5	0	1.74e-05	0.324	2.09408	2.99615	-7.91236	19	22	11	CDS		0	0
hsa-miR-6503-3p	NM_001346897	EGFR	GGGACTAGGATGCAGACCTCC#GGGCTGCAAAGCTGTCCCA#(((((.((..(((((.(((..#))))))))...))))))).	3285	3304	0.846154	-20.9	0	1.22e-06	0.515	1.2388	2.76781	-8.37048	15	19	8	CDS		0	0
hsa-miR-6504-5p	NM_001346897	EGFR	TCTGGCTGTGCTGTAATGCAG#TGCGTTCGGCACGGTGTATAAGGGACTCTGGATCCCAGAA#(((((((((((((.((((((.#))))))))))))))....................))))).	2288	2328	0.923077	-23.2	1	6.02e-05	0.5	5.84114	5.44597	-4.79441	19	40	14	CDS		0	0
hsa-miR-6504-5p	NM_001346897	EGFR	TCTGGCTGTGCTGTAATGCAG#CTGCAAAGCTGTCCCATCAAGGAAGACAGCTTCTTGCAGCGATACAGCTCAGAC#(((((((((((((((((((((#)))))............................)))))))...))))).)))).	3288	3342	0.923077	-22.8	1	0.00492666	0.456	2.71324	2.1248	-3.93757	21	54	7	CDS		0	0
hsa-miR-6506-5p	NM_001346897	EGFR	ACTGGGATGTCACTGAATATGGT#ACCTCCATCAGTGGCGATCTCCAC#..((((((((((((((....(((#)))....)))))))).))).))).	1212	1236	0.923077	-20.3	1	0.000179543	0.456	3.89565	2.87026	-4.957	17	24	8	CDS		0	0
hsa-miR-6506-5p	NM_001346897	EGFR	ACTGGGATGTCACTGAATATGGT#CATACAGTGCCACCCAGA#.(((((.((.(((((..((((..#))))))))).))))))).	1790	1808	0.923077	-18.8	0	0.00816903	0.456	1.60917	2.95062	-6.81257	16	18	9	CDS		0	0
hsa-miR-6508-3p	NM_001346897	EGFR	TGGGCCATGCATTTCTAGAACT#AGAAGTGCGAAGGGCCTT#.(((((.(((((((((......#)))))))))...))))).	1105	1123	0.846154	-19.5	0	0.000189759	0.485	5.18969	3.79913	-5.33701	14	18	9	CDS		0	0
hsa-miR-6509-3p	NM_001346897	EGFR	TTCCACTGCCACTACCTAATTT#GGATGGTGGGGGCCCTCCTCTTGCTGCTGGTGGTGGCCCTGGGGA#(((((..(((((((((......#.)))))))))..))))).	2071	2116	0.846154	-22.5	0	1.2e-05	0.324	4.31089	1.69668	-7.38222	14	18	9	CDS		0	0
hsa-miR-6510-5p	NM_001346897	EGFR	CAGCAGGGGAGAGAGAGGAGTC#GACTCCTTCACACATACTCCTCCTCTGG#...((((((((.((((((((((#))))))).........))))))))))).	1260	1288	0.846154	-26.1	0	0.00230723	0.529	2.49718	3.42503	-9.86134	18	28	11	CDS		0	0
hsa-miR-6510-5p	NM_001346897	EGFR	CAGCAGGGGAGAGAGAGGAGTC#GGCCCTCCTCTTGCTGCTGG#((((((..(((((.((((.(((#)))))))))))).)))))).	2081	2101	1	-25.8	0	0.005468	0.324	1.62337	2.67262	-8.65174	18	20	12	CDS		0	0
hsa-miR-6510-3p	NM_001346897	EGFR	CACCGACTCTGTCTCCTGCAG#CTGCAGGAGAGGGAGCTTGTGG#(((...((((.((((((((((#)))))))))).))))...))).	2172	2194	0.923077	-28.8	0	3.89e-05	0.353	4.35579	4.20435	-15.8144	17	22	10	CDS		0	0
hsa-miR-6511a-5p	NM_001346897	EGFR	CAGGCAGAAGTGGGGCTGACAGG#CTGCAGGCTGCACAGGCCCCCGGGAGAGCGACTGCCTGG#(((((((..((((((((..(((.#.)))....)))))).......))..))))))).	835	874	0.846154	-28	1	6.23e-06	0.324	4.03801	4.00707	-7.3076	18	33	7	CDS		0	0
hsa-miR-6511a-3p	NM_001346897	EGFR	CCTCACCATCCCTTCTGCCTGC#GGGATGGTGGGGG#((((((((((((..........#)))))))))))).	2070	2083	0.923077	-25.1	1	1.75e-06	0.324	4.41568	1.78207	-7.05204	12	13	12	CDS		0	0
hsa-miR-6512-3p	NM_001346897	EGFR	TTCCAGCCCTTCTAATGGTAGG#CCTTCTTAAAGACCATCCAGGAGGTGGCTGGT#..(((((((((((.(((((...#.)))))...))))).)))))).	490	522	0.923077	-23.1	1	3.38e-06	0.515	3.89249	3.60489	-5.81384	16	22	6	CDS		0	0
hsa-miR-6513-5p	NM_001346897	EGFR	TTTGGGATTGACGCCACATGTCT#AGACATGGACGACGTGGTGGATGCCGACGAGTACCTCATCCCAC#..(((((.(((((((((.(((((#.)))))..))))))................)))))))).	3140	3184	0.846154	-19.4	0	0.0174104	0.368	4.2987	3.98401	-7.27064	19	39	8	CDS		0	0
hsa-miR-6514-5p	NM_001346897	EGFR	TATGGAGTGGACTTTCAGCTGGC#CAGCTGCAAGGCCACAGGCCAG#..(((.((((.((((((((((..#)))))).))))))))...))).	1616	1638	0.846154	-21.8	0	3.1e-06	0.382	2.09966	2.78002	-9.68273	17	22	8	CDS		0	0
hsa-miR-6514-3p	NM_001346897	EGFR	CTGCCTGTTCTTCCACTCCAG#CTGGGGTGCAGGAGAGGAGAACTGCCAGA#(((.(.(((((((((((((((#)))))))).......))))))).).))).	722	751	0.846154	-21.5	0	0.00748955	0.441	3.31404	3.21136	-8.87056	19	29	8	CDS		0	0
hsa-miR-6514-3p	NM_001346897	EGFR	CTGCCTGTTCTTCCACTCCAG#GAGATGGAGGAAGACGGCGT#.(((((.(((((((((((...#))).)))))))).).)))).	1074	1094	0.923077	-20.8	0	0.00147774	0.412	5.2987	4.27543	-5.33701	16	20	8	CDS		0	0
hsa-miR-6515-5p	NM_001346897	EGFR	TTGGAGGGTGTGGAAGACATC#GTGGCGATCTCCACATCCTGCCGGT#(((((((((((((.(((....#.)))))))))))).)))).	1222	1247	1	-21	1	8.95e-05	0.441	2.53933	3.28893	-4.79441	16	19	12	CDS		0	0
hsa-miR-6515-5p	NM_001346897	EGFR	TTGGAGGGTGTGGAAGACATC#TCTTCAGCAGCCCCTCCAC#.((((((((((.(((((....#))))).)))..))))))).	3193	3212	0.846154	-20.5	1	0.00706247	0.368	3.4413	3.64216	-7.14013	15	19	7	CDS		0	0
hsa-miR-6515-3p	NM_001346897	EGFR	TCTCTTCATCTACCCCCCAG#TGGGAGCTGCTGGGGTGCAGGAGAGGAGAA#(((((((.(((.(.((((((#.)))))).).))).))))))).	713	743	0.923077	-23.7	1	0.00156977	0.456	3.09143	3.74317	-10.4549	17	22	7	CDS		0	0
hsa-miR-6715a-3p	NM_001346897	EGFR	CCAAACCAGTCGTGCCTGTGG#CCACAGGCGCCTTGACTGA#......(((((((((((((((#))))))))))...))))).	3343	3362	0.846154	-25.4	0	0.000212867	0.397	1.49839	2.53635	-15.5666	15	19	10	CDS		0	0
hsa-miR-6715a-3p	NM_001346897	EGFR	CCAAACCAGTCGTGCCTGTGG#CTACGGGGTGACTGTTTGGG#(((((.((((((..(((((((#))))))).))))))))))).	2822	2842	0.846154	-23.2	0	0.000307734	0.5	6.76496	5.17693	-7.9845	18	20	11	CDS		0	0
hsa-miR-6715b-5p	NM_001346897	EGFR	ACAGGCACGACTGGTTTGGCA#TGCCACCCAGAGTGCCTGC#.(((((((..((((..(((((#))))).)))).))))))).	1797	1816	0.923077	-25.9	1	4.53e-06	0.441	4.33804	2.78021	-7.06072	16	19	7	CDS		0	0
hsa-miR-6715b-5p	NM_001346897	EGFR	ACAGGCACGACTGGTTTGGCA#TGCCACAACCAGTGTGCTG#...(((((.((((((((((((#))))).)))))))))))).	819	838	0.846154	-24.3	0	0.000315063	0.324	4.17285	4.12237	-7.57093	17	19	12	CDS		0	0
hsa-miR-6715b-5p	NM_001346897	EGFR	ACAGGCACGACTGGTTTGGCA#TGCACAAGCTCTTTGTTGTGTCTGG#.((((((((((.(((((((((#))).))))))....)))))))))).	3572	3597	1	-23.1	1	0.0222635	0.529	-0.6685	-0.451625	-7.14013	19	25	10	3UTR		0	0
hsa-miR-6717-5p	NM_001346897	EGFR	AGGCGATGTGGGGATGTAGAGA#CTCTACAACCCCACCACGTA#..(((..((((((.(((((((.#))))))).))))))..))).	930	950	0.846154	-26.3	0	0.0801475	0.412	3.70296	4.07093	-9.25849	16	20	7	CDS		0	0
hsa-miR-6717-5p	NM_001346897	EGFR	AGGCGATGTGGGGATGTAGAGA#TCCGCCCGAGTCCCCGCCTCGCCG#.(((((.((((((((.......#.)))))))).))))).	152	176	0.923077	-25.2	0	0.00332813	0.206	-0.538072	-0.110797	-5.57006	13	16	8	5UTR		0	0
hsa-miR-6511b-5p	NM_001346897	EGFR	CTGCAGGCAGAAGTGGGGCTGACA#CAGTGCCACCCAGAGTGCCTGCC#..(((((((...((((.((((...#)))).))))......))))))).	1794	1817	1	-26	1	1.81e-05	0.426	3.36126	2.88836	-12.3711	15	23	7	CDS		0	0
hsa-miR-6511b-3p	NM_001346897	EGFR	CCTCACCACCCCTTCTGCCTGCA#TGCAGGAGAGGGAGCTTGTGGAGCCTCTTACACCCAGTGGAGAAGCTCCCAACCAAGCTCTCTTGAGGA#((((((((((((((((.((((((#)))))))))))).)......................)))).......................))))).	2173	2242	0.923077	-23.5	1	0.000465438	0.544	5.10861	4.36695	-3.93757	22	69	12	CDS		0	0
hsa-miR-6718-5p	NM_001346897	EGFR	TAGTGGTCAGAGGGCTTATGA#TCAGCAGCCCCTCCACGTCACGGACTCCCCTCCTGAGCTCTCTGAGTGCA#..(((.((((((((((((.((#.)).)))))))))))).))).	3196	3246	0.846154	-23.6	0	8.38e-05	0.426	3.66933	3.57563	-6.85796	17	21	12	CDS		0	0
hsa-miR-6720-5p	NM_001346897	EGFR	TTCCAGCCCTGGTAGGCGCCGCG#GTGGCGATCTCCACATCCTGCCGGTGGCA#.....(((((((((((((((((.#))))))..........)))))))).))).	1222	1251	0.923077	-29.1	0	7.61e-05	0.441	2.44438	3.36053	-13.6656	17	29	8	CDS		0	0
hsa-miR-6720-5p	NM_001346897	EGFR	TTCCAGCCCTGGTAGGCGCCGCG#CGTGTGCCGCCTGCTGGGCA#.....((((.(((((((((((((#)))).)).))))))))))).	2444	2464	0.923077	-27.2	0	2.41e-06	0.324	4.61391	5.62831	-14.9081	17	20	11	CDS		0	0
hsa-miR-6722-5p	NM_001346897	EGFR	AGGCGCACCCGACCACATGC#GCGTGGACAAGTGCAACCTTCTGGAGGGTGAGCCA#.(((.(((((..((((((((#)))))................))).))))).))).	1729	1764	0.846154	-21.7	0	0.000318202	0.471	3.50872	2.68106	-14.0839	16	35	5	CDS		0	0
hsa-miR-6722-3p	NM_001346897	EGFR	TGCAGGGGTCGGGTGGGCCAGG#CTTGGTGCACCGCGACCTGGCAG#(((..((((((((((.((((((#)))))).)))).)))))).))).	2621	2644	0.846154	-31.3	0	4.95e-06	0.382	4.57311	5.76313	-11.3217	19	23	6	CDS		0	0
hsa-miR-6722-3p	NM_001346897	EGFR	TGCAGGGGTCGGGTGGGCCAGG#GGCCCCCTGACTCCG#....(((((((((.(((((...#)))))))))))))).	199	214	1	-30.1	0	0.000349114	0.324	0.0875096	-0.307745	-10.4034	14	15	14	5UTR		0	0
hsa-miR-892c-5p	NM_001346897	EGFR	TATTCAGAAAGGTGCCAGTCA#GACCCCACAGGCGCCTTGACTGAGG#..(((((.((((((((.((..#.)).))))))))..))))).	3339	3364	0.871795	-19.6	0	0.000126561	0.412	3.61616	2.64651	-7.27064	15	20	8	CDS		0	0
hsa-miR-892c-5p	NM_001346897	EGFR	TATTCAGAAAGGTGCCAGTCA#GGCTGGCCAAACTGCTGGGTGC#(((((((..((..(((((((.#)))))))....)).))))))).	2695	2717	0.846154	-19.1	1	0.000464797	0.5	6.26764	5.30034	-11.9435	16	22	7	CDS		0	0
hsa-miR-892c-3p	NM_001346897	EGFR	CACTGTTTCCTTTCTGAGTGGA#TCTCCAGAGGGGGAAACAGTGG#((((((((((((((((.(.(((#)))))))))))).)))))))).	3495	3517	1	-22.6	1	0.000280332	0.441	-0.543018	-0.66211	-3.93757	20	22	12	CDS		0	0
hsa-miR-6726-5p	NM_001346897	EGFR	CGGGAGCTGGGGTCTGCAGGT#CTGCAGGCTGCACAGGCCCCCGG#((((.((((.(((((((((..#))))))))).))...)).)))).	835	858	0.846154	-28.3	0	0.000115684	0.353	4.00364	3.7909	-9.29912	17	23	9	CDS		0	0
hsa-miR-6726-5p	NM_001346897	EGFR	CGGGAGCTGGGGTCTGCAGGT#GCTTGTGGAGCCTCTTACACCCAGTGGAGAAGCTCCCA#.((((((((((.(((((((((#))))))))).))).................))))))).	2186	2224	0.846154	-27.8	1	4.16e-05	0.485	5.07372	4.33028	-7.14013	19	38	9	CDS		0	0
hsa-miR-6727-5p	NM_001346897	EGFR	CTCGGGGCAGGCGGCTGGGAGCG#CGCTGCTGGCTGCGCTCTGCCCGGCGAGT#((((((((((((((((((.((((#)))).))))))))...))))))..)))).	298	327	0.846154	-35.1	1	3.94e-06	0.338	-0.217809	1.40884	-3.93757	22	29	8	CDS		0	0
hsa-miR-6727-5p	NM_001346897	EGFR	CTCGGGGCAGGCGGCTGGGAGCG#TGCTCCCCCGAGGGCTGCTGGGGCCCGGAGC#(((.((((.((((((((((((((#))))))).....)))))))...)))).))).	1653	1684	0.923077	-34.6	0	9.23e-09	0.309	3.9894	1.96605	-8.02599	21	31	7	CDS		0	0
hsa-miR-6727-3p	NM_001346897	EGFR	TCCTGCCACCTCCTCCGCAG#CTGCGGAGGCTGCTGCAGGAG#((((((..(..(((((((((#)))))))))..)..)))))).	2160	2181	0.846154	-28.2	0	7.11e-06	0.368	2.64125	3.79795	-11.8622	16	21	9	CDS		0	0
hsa-miR-6727-3p	NM_001346897	EGFR	TCCTGCCACCTCCTCCGCAG#AGGAGGTGGCTGGT#.((.((((((((((......#)))))))))).)).	508	522	0.923077	-23.3	0	3.38e-06	0.515	4.75493	3.21722	-7.79385	12	14	10	CDS		0	0
hsa-miR-6728-5p	NM_001346897	EGFR	TTGGGATGGTAGGACCAGAGGGG#CCTTTGGATCCAAGCCATATGACGGAATCCCT#..((((((((.((((((((((..#))))))).)))..))))..........)))).	2851	2883	0.923077	-23.2	1	0.0166428	0.485	5.29019	5.28773	-7.78178	18	32	7	CDS		0	1
hsa-miR-6728-5p	NM_001346897	EGFR	TTGGGATGGTAGGACCAGAGGGG#CCCCGGGAGAGCGACTGCCTGGTCTGCCGCAAATTCCGAG#(((((((((((.((((((.((((#))))..............))))))))))....))))))).	852	892	0.923077	-23.2	1	0.00258799	0.338	3.71205	3.81712	-7.28438	21	40	10	CDS		0	1
hsa-miR-6728-3p	NM_001346897	EGFR	TCTCTGCTCTGCTCTCCCCAG#CTGACTCCGTCCAGTATTGATCGGGAGAGCCGGAGCGAGC#.(((.(((((((((((((...#.)))))))).)))))))).	205	245	0.923077	-27.2	0	1.63e-06	0.353	-0.312355	-0.217616	-7.91236	16	19	8	5UTR		0	0
hsa-miR-6729-5p	NM_001346897	EGFR	TGGGCGAGGGCGGCTGAGCGGC#GCCGAGGCGGCCGGAGTCCCGAGCTAGCCCCGGCGGCCGCCGCCGCCCAG#((((((..((((((((.(.(((#.))).)..))))))))..)))))).	75	125	0.846154	-35.8	0	1.63e-05	0.206	-0.182009	-0.173108	-7.7949	18	25	8	5UTR		0	0
hsa-miR-6729-3p	NM_001346897	EGFR	TCATCCCCCTCGCCCTCTCAG#CTGGAGGGTGAGCCAAGGGAG#...((((.(((((((((.(((#))))))))))))....)))).	1749	1770	0.923077	-24.6	0	0.00298108	0.471	4.41517	2.70536	-8.82818	16	21	12	CDS		0	0
hsa-miR-6730-5p	NM_001346897	EGFR	AGAAAGGTGGAGGGGTTGTCAGA#TCTTCAGCAGCCCCTCCACGTC#....(.(((((((((((((.(((#)))...))))))))))))).).	3193	3215	0.820513	-27.5	0	0.00216335	0.368	3.71143	3.61325	-11.4475	17	22	13	CDS		0	0
hsa-miR-6730-5p	NM_001346897	EGFR	AGAAAGGTGGAGGGGTTGTCAGA#GACAACCCCCACGTGTGCCGCCTG#....((((((.(((((((((...#)))))))))........)))))).	2433	2457	0.846154	-25.1	0	0.000379173	0.324	4.84968	5.60472	-12.3713	15	24	9	CDS		0	0
hsa-miR-6731-5p	NM_001346897	EGFR	TGGGAGAGCAGGGTATTGTGGA#CCACAGGCCAGGTCTGCCATGCCTTGTGCTCCCC#.(((((.(((((((((.(((((#.))))).))))))))).))))).	1627	1661	0.846154	-27.2	0	5.58e-05	0.265	1.3467	2.80306	-5.33701	19	23	9	CDS		0	0
hsa-miR-6731-5p	NM_001346897	EGFR	TGGGAGAGCAGGGTATTGTGGA#TCCCAGTGCCTGGTGAGTGGCTTGTCTGGAAACAGTCCTGCTCCTCAA#((((.(((((((((((((.(((#))))))))))...........................)))))))))).	3385	3433	0.846154	-23.1	0	0.00888355	0.412	1.06716	0.932661	-8.05661	20	48	10	CDS		0	0
hsa-miR-6731-3p	NM_001346897	EGFR	TCTATTCCCCACTCTCCCCAG#GGGGTGACTGTTTGGGAGTTGAT#((.((((((((.((.((((..#)))).)).))...)))))).)).	2826	2849	0.846154	-19.3	0	0.0106573	0.5	6.20785	5.29943	-9.57737	16	23	6	CDS		0	0
hsa-miR-6732-5p	NM_001346897	EGFR	TAGGGGGTGGCAGGCTGGCC#GGCCAGGTCTGCCATGCCTTGT#(((((.((((((((((((((#)))))).)))))))).))))).	1632	1654	0.923077	-33.2	0	0.000815336	0.294	1.64712	2.74038	-5.83853	19	22	8	CDS		0	0
hsa-miR-6732-5p	NM_001346897	EGFR	TAGGGGGTGGCAGGCTGGCC#GGCGCAGCGCGGCCGCAGCAGCCTCCGCCCCCC#..((((((((.(((((((((#.)))).....))))))))))))).	19	52	1	-32.6	1	1.37e-05	0.147	0.342548	-0.225405	-7.78178	17	24	13	5UTR		0	0
hsa-miR-6733-3p	NM_001346897	EGFR	TCAGTGTCTGGATTTCCTAG#GGGGACCAGACAACTGT#.((((((((((.(((((...#)))))))))))).))).	1846	1863	0.846154	-19.6	1	0.000918449	0.441	2.10578	3.41215	-7.14013	15	17	12	CDS		0	0
hsa-miR-6733-3p	NM_001346897	EGFR	TCAGTGTCTGGATTTCCTAG#AGGAAATCACAGGGTTTTTGCTGAT#((((((((((((((((((..#)))))))).)))).....)))))).	1321	1346	0.923077	-18.3	1	0.00037506	0.529	4.54092	3.43862	-3.93757	18	25	8	CDS		0	0
hsa-miR-6734-5p	NM_001346897	EGFR	TTGAGGGGAGAATGAGGTGGAGA#CTCCACGTCACGGACTCCCCTCC#..((((((((..(((.((((((.#)))))).)))....)))))))).	3206	3229	1	-30.8	1	0.00147235	0.412	3.90876	3.37838	-11.3616	17	23	8	CDS		0	0
hsa-miR-6734-3p	NM_001346897	EGFR	CCCTTCCCTCACTCTTCTCTCAG#GAGGCAGGGAATGCGTGGACAAGTGCAACCTTCTGGAGGGTGAGCCAAGGGA#(((((..((((((((((......#.))))))))))..))))).	1717	1769	1	-23.2	0	0.00235314	0.471	1.9315	3.44465	-7.38222	15	19	10	CDS		0	0
hsa-miR-6735-5p	NM_001346897	EGFR	CAGGGCAGAGGGCACAGGAATCTGA#CGGGACGGCCGGGGCAGCGCTCCTGGCGCTGCTGGCTGCGCTCTGCCCG#..((((((((.((((((((..(((.#.)))...)))))...........))).)))))))).	272	321	0.846154	-30.3	1	2.5e-05	0.309	-0.553299	0.0483184	-7.78178	19	36	8	CDS		0	0
hsa-miR-6735-5p	NM_001346897	EGFR	CAGGGCAGAGGGCACAGGAATCTGA#CAGATTTGATCCCTGTTCTCTCTGCTGGCTCTATCTTGACCTGT#((((((((((((.(((((((((((.#)))))).....))))).))))))))..............)))).	3742	3786	0.923077	-28.1	1	0.00414641	0.662	0.0361035	-0.174873	-5.22671	23	44	8	3UTR		0	0
hsa-miR-6735-3p	NM_001346897	EGFR	AGGCCTGTGGCTCCTCCCTCAG#GAGGTGAAAACAGCTGCAAGGCCACAGGCCA#.(((((((((((..((((((..#)))).))............))))))))))).	1606	1637	0.846154	-28.8	1	2.41e-07	0.397	-0.048015	2.4786	-5.9393	17	31	11	CDS		0	0
hsa-miR-6736-5p	NM_001346897	EGFR	CTGGGTGAGGGCATCTGTGGT#CCACAGGCGCCTTGACTGAGG#((.(((.(((((.(((((((.#))))))).))))).))).)).	3343	3364	0.884615	-27.8	0	0.000126561	0.412	3.70399	2.60424	-8.32793	17	21	7	CDS		0	0
hsa-miR-6736-5p	NM_001346897	EGFR	CTGGGTGAGGGCATCTGTGGT#ACCTACGGATGCACTGGGCCAGG#((((.(.((.(((((((((((#))).)))))))).)).).)))).	1998	2021	0.910256	-26.4	0	0.000157476	0.426	3.03987	2.54653	-10.8428	18	23	8	CDS		0	0
hsa-miR-6736-3p	NM_001346897	EGFR	TCAGCTCCTCTCTACCCACAG#CTGTCCCAATGGGAGCTGCTGGGGTGCAGGAGAGGAGAACTGC#.((((((((((((((((.(((#.)))))))...)))))))))..))).	704	747	0.961538	-25.2	1	0.00385444	0.441	3.96925	3.48214	-3.79332	19	26	9	CDS		0	0
hsa-miR-6737-5p	NM_001346897	EGFR	TTGGGGTGGTCGGCCCTGGAG#TCCAGTGTGCCCACTACATTGACGGCCCCC#..(((((.((((((((((((.#))))).).))).........))).))))).	1864	1894	0.923077	-26.2	0	0.0114058	0.397	3.07221	3.11889	-7.27064	17	30	5	CDS		0	1
hsa-miR-6738-5p	NM_001346897	EGFR	CGAGGGGTAGAAGAGCACAGGGG#CCTTGTGCTCCCCCGAGG#(..((((.....((((((((((.#))))))))))))))..).	1648	1666	0.923077	-25.4	0	2.79e-07	0.265	2.33839	2.55774	-17.4429	15	18	14	CDS		0	0
hsa-miR-6738-3p	NM_001346897	EGFR	CTTCTGCCTGCATTCTACTCCCAG#TGGGAGCTGCTGGGGTGCAGGAGAGGA#(((((.(((((((((((((((((.#))))))....)))))))))))))))).	713	740	0.846154	-31.7	0	0.000656959	0.471	4.08732	3.72571	-5.83853	22	27	16	CDS		0	0
hsa-miR-6740-5p	NM_001346897	EGFR	AGTTTGGGATGGAGAGAGGAGA#CTCCTCGACCCACTCAGCAGCAGCCAGTCTCCAGTGTCCAAGCC#.(((((((.((((((((((((.#)))))).....................))))))...))))))).	3434	3478	0.846154	-23.6	1	0.114182	0.353	-0.321268	0.26659	-4.84971	19	44	7	CDS		0	0
hsa-miR-6740-5p	NM_001346897	EGFR	AGTTTGGGATGGAGAGAGGAGA#TCTCCTCCATCCTGGAG#..((((((((((((.((((...#)))))))))))))))).	2893	2910	0.923077	-22.3	1	2.91e-06	0.397	2.69117	5.28446	-5.69245	16	17	16	CDS		0	0
hsa-miR-6740-5p	NM_001346897	EGFR	AGTTTGGGATGGAGAGAGGAGA#CTCCTCCTCTGGATCCACAGGAACTG#((((((((((((((.((((((.#))))))))))..)))).))..)))).	1276	1302	1	-21.6	1	0.000102482	0.559	3.10691	3.50177	-4.67302	20	26	10	CDS		0	0
hsa-miR-6740-3p	NM_001346897	EGFR	TGTCTTCTCTCCTCCCAAACAG#CTGTCCCAATGGGAGCTGCTGGGGTGCAGGAGAGGAGAA#..((((((((((((((...(((#.)))...)))...))))))))))).	704	743	0.846154	-24	1	0.00156977	0.456	4.59614	3.52952	-4.957	17	25	11	CDS		0	0
hsa-miR-6741-5p	NM_001346897	EGFR	GTGGGTGCTGGTGGGAGCCGTG#CACGGACTCCCCTCCTGAGCTCTCTGAGTGCAACCAGCAACAATTCCACC#((((((((((((((((((((((#))))).))))).....................))))))).....))))).	3214	3264	0.846154	-30.5	1	0.0889384	0.485	2.96083	3.41116	-3.93757	22	50	7	CDS		0	0
hsa-miR-6741-3p	NM_001346897	EGFR	TCGGCTCTCTCCCTCACCCTAG#CTGGGGTGCAGGAGAGGAGAACTGCCA#..((((((((((..((((((((#))))))))..)))))))......))).	722	749	0.923077	-28	1	0.00725094	0.441	2.75358	3.44411	-7.10297	18	27	8	CDS		0	0
hsa-miR-6741-3p	NM_001346897	EGFR	TCGGCTCTCTCCCTCACCCTAG#AGGGTGAGCCAAGGGAGTTTGTGGAG#((.((...((((((((((((..#))))))).....)))))...)).)).	1753	1779	0.923077	-23.9	0	0.0567787	0.456	4.31425	2.87584	-11.2534	16	26	7	CDS		0	0
hsa-miR-6741-3p	NM_001346897	EGFR	TCGGCTCTCTCCCTCACCCTAG#AGGGCTGCTGGGGCCCGGAGCCC#..((((((.((((.((((((..#)))).))..))))...)))))).	1663	1686	0.846154	-22.6	1	2.24e-08	0.294	5.26343	1.96098	-6.87023	16	23	6	CDS		0	0
hsa-miR-6742-3p	NM_001346897	EGFR	ACCTGGGTTGTCCCCTCTAG#CTGCTGGGGCCCGGAGCCCAGGG#.((((((((.(((((..(((#)))..))))...).)))))))).	1667	1690	0.846154	-23.2	1	1.64e-06	0.294	1.51806	2.48768	-5.26888	16	23	8	CDS		0	1
hsa-miR-6742-3p	NM_001346897	EGFR	ACCTGGGTTGTCCCCTCTAG#CTGGAGGGTGAGCCAAGGG#.(((.(((..((((((((((#)))))))).))))).))).	1749	1768	1	-21.9	0	0.00174918	0.456	3.63268	2.72753	-10.2113	16	19	8	CDS		0	1
hsa-miR-6743-5p	NM_001346897	EGFR	AAGGGGCAGGGACGGGTGGCCC#GGAGAACTCTGAGTGCATACAGTGCCACCCAGAGTGCCTGCCTCA#..((((((((.(((((((((..#.)))))))...)).)))))))).	1775	1820	0.923077	-34	1	1.43e-05	0.397	1.68752	3.28562	-7.78178	17	23	8	CDS		0	0
hsa-miR-6743-5p	NM_001346897	EGFR	AAGGGGCAGGGACGGGTGGCCC#GGCGTCCGCCCGAGTCCCCGCCTCG#..(((((.((((((((((((((#)).).))))))..))))).))))).	148	173	0.846154	-31.7	0	0.00131844	0.221	-0.54549	-0.147516	-7.27064	19	25	6	5UTR		0	0
hsa-miR-6743-3p	NM_001346897	EGFR	AGCCGCTCTTCTCCCTGCCCACA#TGTCAGCCGAGGCAGGGAATGCGTGGACAAGTGCAACCTTCTGGAGGGTGAGCC#.((((((((((((((((((....#.))))))))........................)))))))).)).	1709	1763	1	-26.8	1	0.000102443	0.456	2.82371	3.22083	-3.79332	18	45	8	CDS		0	0
hsa-miR-6743-3p	NM_001346897	EGFR	AGCCGCTCTTCTCCCTGCCCACA#TGGGGTGCAGGAGAGGAGAACTGCC#.((.(.((((((((((((((.((#)).)).))))).))))))).).)).	723	748	0.846154	-24.7	0	0.00109467	0.441	2.5245	3.22874	-8.72631	19	25	7	CDS		0	0
hsa-miR-6744-5p	NM_001346897	EGFR	TGGATGACAGTGGAGGCCT#GGCCCCCACTGCGTCA#..((((.((((((.((((.#)))).)))))))))).	1887	1903	0.923077	-24.8	0	0.00112625	0.382	2.68463	3.06848	-7.35753	14	16	10	CDS		0	0
hsa-miR-6744-5p	NM_001346897	EGFR	TGGATGACAGTGGAGGCCT#GGGCTCCGGTGCGTTCGG#((((((.((.(((((.((.#)).))))).)))))))).	2279	2297	0.846154	-21.6	0	1.02e-07	0.471	5.41852	5.71766	-6.95682	15	18	8	CDS		0	0
hsa-miR-6744-5p	NM_001346897	EGFR	TGGATGACAGTGGAGGCCT#GGGCCAAAAGTGTGATCCAA#(((((.(((.(...(((((#)))))...).))).))))).	683	703	0.846154	-20.7	0	0.0695449	0.471	4.59982	2.50135	-12.5738	14	20	5	CDS		0	0
hsa-miR-6744-3p	NM_001346897	EGFR	GGGCCTCTCTTGTCATCCTGCAG#CTGCTGGGGTGCAGGAGAGGA#...(((((((((.((((((((((#)))).))))))))))))))).	719	740	0.846154	-29.5	0	0.000656959	0.471	4.96048	3.4508	-7.80367	19	21	15	CDS		0	0
hsa-miR-6744-3p	NM_001346897	EGFR	GGGCCTCTCTTGTCATCCTGCAG#CTGGAGGGTGAGCCAAGGGAGTTTGTGGAGAACTCTGAGTGCATACAGTGCCA#.((((((((((((((((((.(((#))).)))))))..))))))))............................))).	1749	1802	0.923077	-26.3	1	0.000321856	0.456	3.03996	2.93918	-3.79332	21	53	8	CDS		0	0
hsa-miR-6745	NM_001346897	EGFR	TGGGTGGAAGAAGGTCTGGTT#AACCGGACTGAAGGAGCTGCCCAT#(((((((.....(((((((((#))))))))).......))))))).	647	671	1	-22.3	1	0.000437952	0.559	1.40889	2.53231	-14.7217	16	24	9	CDS		0	0
hsa-miR-6746-5p	NM_001346897	EGFR	CCGGGAGAAGGAGGTGGCCTGG#GGGCCCTCCTCTTGCTGCTGGT#((((.((.((((((.(((((..#)))))..)))))).)).)))).	2080	2102	0.923077	-26.9	0	0.00297774	0.309	2.56647	2.03028	-11.1057	17	22	6	CDS		0	0
hsa-miR-6746-3p	NM_001346897	EGFR	CAGCCGCCGCCTGTCTCCACAG#CAGGAGGTGGCTGG#((((((((.((((.........#)))).)))))))).	507	521	0.923077	-23.5	1	2.55e-06	0.515	3.62105	3.12296	-6.8193	12	14	8	CDS		0	0
hsa-miR-6748-5p	NM_001346897	EGFR	TGTGGGTGGGAAGGACTGGATT#ATCCAGTGTGCCCACTACATTGACGGCCCCCACT#.(((((((((..(.(((((((.#))))))).).))))..............))))).	1863	1897	0.846154	-22.5	1	0.00112016	0.397	3.37806	3.02641	-10.8217	17	34	7	CDS		0	0
hsa-miR-6748-3p	NM_001346897	EGFR	TCCTGTCCCTGTCTCCTACAG#CTGTCCCAATGGGAGCTGCTGGGGTGCAGGAG#((((((((((((((((((...#.))))))..)).)))).)))))).	704	736	0.923077	-22.8	1	7.08e-05	0.456	3.89715	3.2685	-3.93757	18	24	6	CDS		0	0
hsa-miR-6749-5p	NM_001346897	EGFR	TCGGGCCTGGGGTTGGGGGAGC#GCTCCCCCGAGGGCTGCTGGGGCCCGGA#(((((((((.((((((((((((#)))))))))...))).)..)))))))).	1654	1682	0.923077	-36.5	1	7.73e-09	0.294	3.68591	1.92042	-5.18008	21	28	9	CDS		0	0
hsa-miR-6749-3p	NM_001346897	EGFR	CTCCTCCCCTGCCTGGCCCAG#GGGCCAAAAGTGTGATCCAAGCTGTCCCAATGGGAGCTGCTGGGGTGCAGGAGAGGAGA#((((((.(((((..(.(((((#.))))).)))))).)))))).	683	742	1	-29	0	0.00128743	0.456	1.55652	3.14658	-7.86028	17	21	6	CDS		0	0
hsa-miR-6750-5p	NM_001346897	EGFR	CAGGGAACAGCTGGGTGAGCTGCT#GCAGCTCATCACGCAGCTCATGCCCTTCGGCTGCCTCCTGG#(((((..((((((((((((((((.#.)))))))..))))...)))))..))))).	2483	2524	0.846154	-32.7	0	1.02e-05	0.471	4.70233	4.83716	-7.38222	21	30	7	CDS		0	1
hsa-miR-6751-3p	NM_001346897	EGFR	ACTGAGCCTCTCTCTCTCCAG#GGAGAGGAGAACTGCCAGA#.(((.((.((((.((((((..#))))))))))...))))).	732	751	0.923077	-21.5	0	0.00748955	0.441	2.0596	3.51984	-11.5151	15	19	10	CDS		0	1
hsa-miR-6752-5p	NM_001346897	EGFR	GGGGGGTGTGGAGCCAGGGGGC#GCCCCCCACTCATGCTCTACAACCCCACCA#((((((((((((((..((((((#)))))).......)))))))).)))).)).	916	946	0.846154	-35.2	1	0.0896007	0.382	4.07774	4.23106	-4.90607	20	30	8	CDS		0	1
hsa-miR-6752-5p	NM_001346897	EGFR	GGGGGGTGTGGAGCCAGGGGGC#GCCCCGGCGGCCGCCGCCGCCCA#(((.(((((((.(((..(((((#))))))))..)))).))).))).	101	124	0.846154	-33.1	0	7.32e-07	0.206	0.307576	-0.374506	-10.5494	18	23	8	5UTR		0	1
hsa-miR-6752-3p	NM_001346897	EGFR	TCCCTGCCCCCATACTCCCAG#CTGGGATGGTGGGGGCCCTCCTCTTGCTGCTGGTGGTGGCCCTGGGGAT#(((((((((((((..((((((#))))))..))))))))...........................))))).	2068	2117	0.923077	-30.4	1	1.46e-05	0.309	2.27614	2.36254	-5.52986	19	49	8	CDS		0	0
hsa-miR-6753-5p	NM_001346897	EGFR	CACCAGGGCAGAGCAGGGCTGA#GGCTGCGCTCTGCCCGGCGA#(.((.(((((((((..((((..#))))..))))))))))).).	305	325	0.923077	-28.1	0	1.73e-06	0.338	-0.110303	1.22604	-10.1888	16	20	11	CDS		0	0
hsa-miR-6753-5p	NM_001346897	EGFR	CACCAGGGCAGAGCAGGGCTGA#CAGTACCTGCTCAACTGGTGT#((((((....(((((((((((.#)))).)))))))..)))))).	2559	2580	0.807692	-27	0	0.000667584	0.529	4.19394	5.22648	-10.0938	17	21	7	CDS		0	0
hsa-miR-6753-3p	NM_001346897	EGFR	TGGTCTGTCTCTGCCCTGGCAC#TGCACAGGACGGGGACCAGACA#..(((((((((((.(((((((.#))).)))).))))))).)))).	1836	1858	0.923077	-26	1	0.000195924	0.456	3.48336	3.1122	-5.81384	18	22	7	CDS		0	0
hsa-miR-6754-5p	NM_001346897	EGFR	CCAGGGAGGCTGGTTTGGAGGA#TCCAGTGTCCAAGCCAGGTGCTCCCTC#..((((((.(((((((((((((#)))....))))))))))...)))))).	3463	3490	0.923077	-27.3	1	0.000422019	0.382	-0.766046	-0.712372	-6.01339	19	27	10	CDS		0	0
hsa-miR-6754-3p	NM_001346897	EGFR	TCTTCACCTGCCTCTGCCTGCA#TGCAGGAGAGGGAGCTTGTGGAGC#.((((((((.(((((.((((((#))))))))))).))...)))))).	2173	2197	0.884615	-26.9	1	4.14e-07	0.368	6.36145	4.22507	-5.26888	19	24	11	CDS		0	0
hsa-miR-6755-3p	NM_001346897	EGFR	TGTTGTCATGTTTTTTCCCTAG#AGGGGGAAACAGTGGCAGA#..(((((((..(((((((((..#)))))))))..))))))).	3502	3521	0.846154	-18.6	1	0.00103524	0.426	-0.0956217	-0.676977	-9.02428	16	19	9	CDS		0	0
hsa-miR-6756-5p	NM_001346897	EGFR	AGGGTGGGGCTGGAGGTGGGGCT#GCCTCACCTCCACCGTGCAGCTCATCACGCAGCTCATGCCCTT#(((((.((((((((((((((((.#))))))))))))...................))))..))))).	2467	2510	0.846154	-34.7	0	0.000475107	0.368	4.6998	5.05764	-5.83853	21	43	12	CDS		0	0
hsa-miR-6756-3p	NM_001346897	EGFR	TCCCCTTCCTCCCTGCCCAG#GGCAGGGAATGCGTGGACAAGTGCAACCTTCTGGAGGGTGAG#((.((((((((((((((...#))))))))........................)))))).)).	1719	1761	0.820513	-24.1	0	8.13e-05	0.456	3.03264	3.2535	-5.49511	16	42	8	CDS		0	0
hsa-miR-6757-5p	NM_001346897	EGFR	TAGGGATGGGAGGCCAGGATGA#CATCAGTGGCGATCTCCACATCCTG#..((((((((((((((.((((.#))))..))))...)))).)))))).	1217	1242	0.846154	-24.6	1	0.000833085	0.456	2.65788	3.29395	-4.957	18	25	6	CDS		0	0
hsa-miR-6757-5p	NM_001346897	EGFR	TAGGGATGGGAGGCCAGGATGA#CAGGCCAGGTCTGCCATGCCTT#.(((.((((.(((((.((.((.#))..)).))))).)))).))).	1630	1652	0.923077	-23.7	0	0.000222203	0.309	0.553358	2.68493	-9.38792	16	22	5	CDS		0	0
hsa-miR-6757-5p	NM_001346897	EGFR	TAGGGATGGGAGGCCAGGATGA#TCAGGCTTGGCCTGAAAACAGGACGGACCTCCATGCCTT#.(((.(((((((((((((.(((#)))..))))))))................))))).))).	1346	1385	1	-23.3	0	0.00670541	0.471	3.43506	4.37124	-7.91236	19	39	8	CDS		0	0
hsa-miR-6757-3p	NM_001346897	EGFR	AACACTGGCCTTGCTATCCCCA#GGGATGGTGGGGGCCCTCCTCTTGCTGCTGGTGG#..((((((((((((((((((..#)))))))))))).))..............)))).	2070	2104	0.923077	-23.1	1	0.000157773	0.324	2.91109	2.08907	-4.957	18	34	12	CDS		0	0
hsa-miR-6757-3p	NM_001346897	EGFR	AACACTGGCCTTGCTATCCCCA#GGATGCACTGGGCCAGGTC#.((.((((((((((.((((...#)))))))..))))))))).	2004	2023	1	-21.7	0	2.78e-05	0.426	2.97272	2.38317	-7.5608	16	19	9	CDS		0	0
hsa-miR-6758-5p	NM_001346897	EGFR	TAGAGAGGGGAAGGATGTGATGT#ACGTCACGGACTCCCCTCCTGA#(((.((((((.((..((((((((#))))))))..))))))))))).	3210	3232	1	-26.9	0	0.00065316	0.412	2.64319	3.79814	-11.3867	19	22	11	CDS		0	0
hsa-miR-6759-5p	NM_001346897	EGFR	TTGTGGGTGGGCAGAAGTCTGT#GCAGGGCTTCTTCAGCAGCCCCTCCACGT#.((((((.((((((((((((((#))))).)))))......)))).)))))).	3185	3214	0.923077	-24.3	1	0.00503383	0.382	4.7704	3.84541	-6.10696	20	29	6	CDS		0	0
hsa-miR-6760-5p	NM_001346897	EGFR	CAGGGAGAAGGTGGAAGTGCAGA#CTGGGCATCTGCCTCACCTCCA#...((((.(((((((.((.(((.#))).)).)))))))...)))).	2457	2479	1	-22.2	0	0.0919184	0.324	6.53377	5.24829	-9.06122	16	22	7	CDS		0	1
hsa-miR-6760-3p	NM_001346897	EGFR	ACACTGTCCCCTTCTCCCCAG#AGAGGGGGAAACAGTGG#.((((((((((((((......#)))))))))..))))).	3500	3517	1	-21.8	1	0.000280332	0.441	-0.572403	-0.655705	-4.02637	14	17	9	CDS		0	0
hsa-miR-6761-5p	NM_001346897	EGFR	TCTGAGAGAGCTCGATGGCAG#CTGCTGGCTGCGCTCTGCCCGGCGAGTCGGGCTCTGGAGGAA#(((...(((((((((((((((#.)))))......))))))))))...))).	300	342	1	-25.2	0	9.48e-05	0.412	-0.151278	1.31138	-12.9896	18	29	10	CDS		0	0
hsa-miR-6761-5p	NM_001346897	EGFR	TCTGAGAGAGCTCGATGGCAG#GCCGGAGCGAGCTCTTCGGGG#(((((.((((((((.((((..#))))...))))))))))))).	233	254	0.923077	-24.4	0	0.000177307	0.309	-0.671596	-0.103009	-6.57398	17	21	13	5UTR		0	0
hsa-miR-6762-5p	NM_001346897	EGFR	CGGGGCCATGGAGCAGCCTGTGT#GCTGCAGGCTGCACAGGCCCCC#.((((((.((..(((((((((((#)).))))))))).)))))))).	834	856	0.846154	-33.8	1	3.44e-06	0.324	4.7598	3.62408	-12.2785	19	22	9	CDS		0	0
hsa-miR-6762-3p	NM_001346897	EGFR	TGGCTGCTTCCCTTGGTCTCCAG#CTGGAGGGTGAGCCAAGGGAGTTTGTGGAGAACTCTGAGTGCATACAGTGCCAC#((((.((((((((((((((((((#)))))).....)))))))))..........................))))))).	1749	1803	0.846154	-27.4	0	0.000311911	0.456	2.7463	2.82368	-8.05661	22	54	9	CDS		0	0
hsa-miR-6763-3p	NM_001346897	EGFR	CTCCCCGGCCTCTGCCCCCAG#CTGGGATGGTGGGGGCCCTCCTCTTGCTGCTGGTGGTGGCCCTGGGGAT#.((((((((((((((((((((#)))))..))))))))))..........................))))).	2068	2117	0.923077	-31.8	1	1.46e-05	0.309	2.58265	2.44906	-3.79332	20	49	10	CDS		0	0
hsa-miR-6764-5p	NM_001346897	EGFR	TCCCAGGGTCTGGTCAGAGTTG#GCTGCTGGTGGTGGCCCTGGGGA#(((((((((((.((((((((..#))).))))).).)))))))))).	2093	2116	0.923077	-25.3	1	1.2e-05	0.324	1.65111	2.94022	-7.28438	19	23	10	CDS		0	0
hsa-miR-6764-5p	NM_001346897	EGFR	TCCCAGGGTCTGGTCAGAGTTG#TAACTGTGAGGTGGTCCTTGGGAA#((((((((.(((.(((.(((((#))))).)))..))).)))))))).	428	452	0.923077	-24	1	4.25e-06	0.574	3.60569	2.97742	-6.28309	19	24	8	CDS		0	0
hsa-miR-6764-3p	NM_001346897	EGFR	TCTCTGGTCTTTCCTTGACAG#CTGCACAGGACGGGGACCAGAC#..(((((((((((((((.(((#))))).))))..))))))))).	1835	1857	0.923077	-20.2	1	0.000179642	0.456	3.56863	3.25282	-4.957	18	22	9	CDS		0	0
hsa-miR-6765-3p	NM_001346897	EGFR	TCACCTGGCTGGCCCGCCCAG#TTGGGCTGGCCAAACTGCTGGGTGC#.(((((((((((((.((((((#)))))).)))))....)))))))).	2692	2717	0.961538	-31	1	0.000464797	0.5	4.34137	5.61711	-4.52877	19	25	8	CDS		0	0
hsa-miR-6766-5p	NM_001346897	EGFR	CGGGTGGGAGCAGATCTTATTGAG#TGGGCATCTGCCTCACCTC#.(((((((.((((((((((.....#)))).))))))))))))).	2458	2477	0.846154	-22.2	1	0.0326803	0.324	6.71979	5.41558	-4.84971	17	19	13	CDS		0	0
hsa-miR-6766-3p	NM_001346897	EGFR	TGATTGTCTTCCCCCACCCTCA#TGAGATGGAGGAAGACGGCGTCC#.(((((((((((.(((..((((#)))).))).))))))))..))).	1073	1096	0.807692	-19.6	1	0.000110275	0.397	3.84696	3.91148	-5.08246	18	23	8	CDS		0	0
hsa-miR-6767-3p	NM_001346897	EGFR	CCACGTGCTTCTCTTTCCGCAG#CTGCGGAGGCTGCTGCAGGAGAGGGAGCTTGTGGA#(((((.(((((.((((((((((#.)))).))))))))))).))))).	2160	2195	0.846154	-28.8	0	1.74e-05	0.368	3.43991	3.83823	-9.18534	20	24	11	CDS		0	0
hsa-miR-6768-5p	NM_001346897	EGFR	CACACAGGAAAAGCGGGGCCCTG#AGGGCCTTGCCGCAAAGTGTGTA#.(((((......((((((((((.#)))))))))).......))))).	1115	1138	0.923077	-24.7	0	0.00132733	0.559	4.00959	3.30859	-16.1211	15	23	10	CDS		0	0
hsa-miR-6768-3p	NM_001346897	EGFR	CAAAGGCCACATTCTCCTGTGCAC#GTGCAGGAGAGGAGAACTGCCA#....(((....(((((((((((..#))))))))))).......))).	727	749	1	-21.4	0	0.00725094	0.441	2.50061	3.41478	-16.9839	14	22	11	CDS		0	0
hsa-miR-6769a-3p	NM_001346897	EGFR	GAGCCCCTCTCTGCTCTCCAG#CTGGAGGGTGAGCCAAGGGAGTTTG#(((((((((((.(((((((((#))))))))))))...)))).)))).	1749	1774	1	-25.2	1	0.00729363	0.471	3.06925	2.9283	-7.28438	20	25	12	CDS		0	0
hsa-miR-6770-5p	NM_001346897	EGFR	TGAGAAGGCACAGCTTGCACGTGA#CACGTGCAAGGACACCTGCCCCCCACTCAT#((((..((((...((((((((((.#))))))))))......)))).....)))).	899	929	0.846154	-24.2	0	0.107631	0.397	4.11181	3.65809	-17.4183	18	30	10	CDS		0	0
hsa-miR-6771-5p	NM_001346897	EGFR	CTCGGGAGGGCATGGGCCAGGC#GCCACAGGCCAGGTCTGCCATGCCTTGTGCTCCCCCGAGG#((((((((((((((((((.(((#.))).)))...))))))))).......)))))).	1626	1666	0.923077	-31.5	1	2.79e-07	0.265	1.89307	2.56884	-3.93757	21	34	9	CDS		0	0
hsa-miR-6771-5p	NM_001346897	EGFR	CTCGGGAGGGCATGGGCCAGGC#GCCTGGTCTGCCGCAAATTCCGAGA#(((((((((((..(((((((((#)))))))))))).)...))))))).	868	893	1	-29.5	1	0.00314276	0.338	3.65753	3.95145	-8.57351	20	25	12	CDS		0	0
hsa-miR-6772-5p	NM_001346897	EGFR	TGGGTGTAGGCTGGAGCTGAGG#CCTGTGCCATCCAAACTGCACCTAC#(((((((((..((((((..(((#)))..))..))))..))))))))).	1979	2004	0.846154	-24.6	1	0.0197017	0.397	4.60496	2.50729	-8.00486	18	25	9	CDS		0	0
hsa-miR-6772-3p	NM_001346897	EGFR	TTGCTCCTGACTCTGTGCCCACA#TGGGGTGCAGGAGAGGAGA#...(((((..(.((((((((.((#)))))))))))..))))).	723	742	1	-22.6	0	0.00128743	0.456	3.82487	3.55072	-12.1602	16	19	11	CDS		0	0
hsa-miR-6773-3p	NM_001346897	EGFR	ACTGTCACTTCTCTGCCCATAG#GGCATTTAGGGGTGACT#...(((((((((.((((.....#))))...))))))))).	1247	1264	0.923077	-18.1	0	0.000367195	0.441	4.27022	3.01114	-7.80367	13	17	9	CDS		0	0
hsa-miR-6774-5p	NM_001346897	EGFR	ACTTGGGCAGGAGGGACCCTGTATG#ACAGGACGGACCTCCATGCCTTTGAGA#.(((((((((((((..((((((...#)))))..)..))))).)))))..))).	1363	1390	0.846154	-26.6	1	0.00854615	0.471	3.41516	4.24126	-4.76182	19	27	5	CDS		0	0
hsa-miR-6774-5p	NM_001346897	EGFR	ACTTGGGCAGGAGGGACCCTGTATG#ACAGGGTTTTTGCTGATTCAGGC#.(((((((((.(((((((((((...#))))))))))).))).)))))).	1329	1352	1	-26.4	1	0.000326469	0.515	3.85054	3.28211	-6.6181	20	23	11	CDS		0	0
hsa-miR-6775-5p	NM_001346897	EGFR	TCGGGGCATGGGGGAGGGAGGCTGG#CAGACTCCAACTTCTACCGTGCCCTGAT#((((((((((((((((((((.(((.#))).))))..))))).))))))))))).	3103	3131	0.923077	-34.8	1	0.0118765	0.456	3.36	4.82583	-3.93757	23	28	11	CDS		0	0
hsa-miR-6775-3p	NM_001346897	EGFR	AGGCCCTGTCCTCTGCCCCAG#CTGGGGTGCAGGAGAGGAGAACTGCCA#.((((((.((((.((((((((#)))))))).)))).)))......))).	722	749	0.846154	-28	1	0.00725094	0.441	5.5093	3.37094	-7.39609	18	27	8	CDS		0	0
hsa-miR-6775-3p	NM_001346897	EGFR	AGGCCCTGTCCTCTGCCCCAG#TGGTGGCCCTGGGGATCGGCCTC#(((((..((((((.((((((.#))).)))...)))))).))))).	2101	2124	0.846154	-24.9	0	2.06e-06	0.368	2.34192	3.04497	-8.23906	17	23	6	CDS		0	0
hsa-miR-6776-5p	NM_001346897	EGFR	TCTGGGTGCAGTGGGGGTT#GGCCCCCACTGCGTCAAGACCTGCCCGGC#.((((((((((((((((((#))))))))))))..........)))))).	1887	1916	1	-31.2	1	6.41e-05	0.397	3.62025	3.40134	-3.79332	18	29	12	CDS		0	0
hsa-miR-6776-3p	NM_001346897	EGFR	CAACCACCACTGTCTCTCCCCAG#GGGGGAAACAGTGGC#......(((((((.((((((...#)))))).))))))).	3503	3518	0.846154	-22.5	0	0.000362954	0.426	-0.907269	-0.856352	-16.4234	13	15	7	CDS		0	0
hsa-miR-6777-5p	NM_001346897	EGFR	ACGGGGAGTCAGGCAGTGGTGGA#TCTGCCATGCCTTGTGCTCCCCC#..(((((((.(((((.(((((((#))))))))))))...))))))).	1639	1662	0.923077	-30	1	5.31e-05	0.279	2.82589	2.88443	-6.43256	19	23	12	CDS		0	0
hsa-miR-6777-5p	NM_001346897	EGFR	ACGGGGAGTCAGGCAGTGGTGGA#CCTCCACGTCACGGACTCCCCT#..((((((((.(((.((((.((.#)).)))))))...)))))))).	3205	3227	1	-28.7	1	0.00316681	0.382	3.29308	3.49761	-8.51722	17	22	8	CDS		0	0
hsa-miR-6777-3p	NM_001346897	EGFR	TCCACTCTCCTGGCCCCCAG#CTGGGGTGCAGGAGAGGAGAA#((..((((((((..((((((#))))))..))))))))..)).	722	743	0.846154	-30.3	0	0.00156977	0.456	2.0057	3.49498	-10.6731	16	21	8	CDS		0	0
hsa-miR-6777-3p	NM_001346897	EGFR	TCCACTCTCCTGGCCCCCAG#CTGCGGAGGCTGCTGCAGGAGAGGGAG#(((.((((((((((((((((#))).)).))).....))))))))))).	2160	2187	0.923077	-27.1	0	0.000150553	0.353	3.38547	3.93505	-6.9696	19	27	11	CDS		0	0
hsa-miR-6778-3p	NM_001346897	EGFR	TGCCTCCCTGACATTCCACAG#CTGCTGGGGTGCAGGAGAGGA#..((((((((.((((((((((#))).))))))))))).)))).	719	740	0.846154	-25.1	1	0.000656959	0.471	4.96048	3.4508	-7.78178	18	21	11	CDS		0	0
hsa-miR-6778-3p	NM_001346897	EGFR	TGCCTCCCTGACATTCCACAG#CTGCGTCTCTTGCCGGAATGTCAGCCGAGGCAG#((((((.((((((((((.(((#.)))..))))))))))..)))))).	1691	1724	0.923077	-26.2	0	1.59e-05	0.397	3.03402	3.2309	-5.48126	19	25	10	CDS		0	0
hsa-miR-6779-3p	NM_001346897	EGFR	AAGCCCTGTCTCCTCCCATCT#AGATGGAGGAAGACGGCGTCCGCAAGTGTAAGAAGTGCGAAGGGCC#..((((((((((((.((((((#)))))))))).)))..........................))))).	1075	1121	0.846154	-22.4	1	0.000699671	0.456	4.36631	3.6583	-5.69245	18	46	10	CDS		0	0
hsa-miR-6779-3p	NM_001346897	EGFR	AAGCCCTGTCTCCTCCCATCT#AGGTGCTCCCTCCAGCATCTCCAGAGGGGGAAACAGTGGCA#..(((((((.(((.(((.(((#.))))))))).)))).))).	3478	3519	0.846154	-22.5	1	0.00205718	0.426	-1.44342	-0.624255	-7.05635	16	20	9	CDS		0	0
hsa-miR-6780a-5p	NM_001346897	EGFR	TTGGGAGGGAAGACAGCTGGAGA#CTTCGGCTGCCTCCTGGA#((((((((.....(((((((((.#))))))))))))))))).	2507	2525	0.807692	-22.7	1	8.24e-06	0.456	4.1571	4.7294	-13.6972	17	18	17	CDS		0	0
hsa-miR-6780a-5p	NM_001346897	EGFR	TTGGGAGGGAAGACAGCTGGAGA#TCTTCAGCAGCCCCTCCACGTCACGGACTCCCCTCCTGAG#(((((((((.((.(.(((((((.#.))))).))...)..)).))))))))).	3193	3233	0.923077	-22.7	1	0.000561713	0.412	2.95483	3.61006	-7.20466	19	28	9	CDS		0	0
hsa-miR-6780a-3p	NM_001346897	EGFR	CTCCTCTGTTTTCTTTCCTAG#TTGGGAATTTGGAAATTACCTATGTGCAGAGGAA#.((((((((((((((((((((#)))))))...)))))..........)))))))).	445	479	1	-19.3	1	0.000572997	0.603	3.66249	3.75984	-3.79332	20	34	8	CDS		0	0
hsa-miR-6780a-3p	NM_001346897	EGFR	CTCCTCTGTTTTCTTTCCTAG#CTGGGGTGCAGGAGAGGAGA#(((((((.((.....((((((#))))))...)).))))))).	722	742	0.846154	-18.4	1	0.00128743	0.456	1.50518	3.40569	-15.3042	15	20	7	CDS		0	0
hsa-miR-6781-5p	NM_001346897	EGFR	CGGGCCGGAGGTCAAGGGCGT#TGTTTGGGACCTCCGGTCA#..(((((((((((..(((((.#)))))..))))))))))).	1564	1583	1	-28	1	2.46e-05	0.618	1.26993	2.28764	-6.54929	16	19	11	CDS		0	0
hsa-miR-6781-3p	NM_001346897	EGFR	TGCCTCTTTTCCACGGCCTCAG#TGGGGCCGACAGCTATGAGATGGAGGAAGACGGCGT#(((((((((((((((((((((.#))))))))............))))).)))).)))).	1058	1094	0.923077	-26.5	1	0.00147774	0.412	3.36759	4.74202	-3.93757	21	36	8	CDS		0	0
hsa-miR-6781-3p	NM_001346897	EGFR	TGCCTCTTTTCCACGGCCTCAG#GAGGCTGCTGCAGGAGAGGGAG#(.((((((((.(((((((((..#))))))).)).)))))))).).	2165	2187	0.923077	-25.6	1	0.000150553	0.353	4.07523	4.02538	-7.92602	18	22	8	CDS		0	0
hsa-miR-6782-5p	NM_001346897	EGFR	TAGGGGTGGGGGAATTCAGGGGTGT#ATCCCTGCCAGCGAGATCTCCTCCATCCTG#..(((((((((((((((((((((..#))))))).......))).))))))))))).	2877	2907	0.923077	-27.2	1	0.000117485	0.412	3.83043	5.63477	-4.957	21	30	11	CDS		0	0
hsa-miR-6782-3p	NM_001346897	EGFR	CACCTTTGTGTCCCCATCCTGCA#TGCACAGGACGGGGACCAGAC#....((((.((((((.(((((((#))))..))).)))))))))).	1836	1857	0.846154	-22.4	0	0.000179642	0.456	3.94291	3.08024	-10.836	17	21	10	CDS		0	0
hsa-miR-6784-3p	NM_001346897	EGFR	TCTCACCCCAACTCTGCCCCAG#GGTGGCATTTAGGGGTGAC#..(((((((.....((((((..#)).))))....))))))).	1244	1263	1	-22.3	1	1.33e-05	0.426	4.17524	3.07754	-14.5171	13	19	7	CDS		0	0
hsa-miR-6784-3p	NM_001346897	EGFR	TCTCACCCCAACTCTGCCCCAG#GGGCCAAAAGTGTGATCCAAGCTGTCCCAATGGGAGCTGCTGGGGTGCAGGA#((((((((((...(.((((((.#.)))).)).).))))))).))).	683	735	0.923077	-23.2	1	1.21e-05	0.456	2.49081	2.84414	-12.1337	17	23	7	CDS		0	0
hsa-miR-6785-5p	NM_001346897	EGFR	TGGGAGGGCGTGGATGATGGTG#CGTCCATCGCCACTGGGATGGTGGGGGCCCTCCTC#.((((((((((((.((((((((#)).)))))))))).............)))))))).	2056	2091	0.923077	-27.3	1	5.02e-08	0.309	3.45779	2.2442	-4.65016	20	35	10	CDS		0	0
hsa-miR-6786-5p	NM_001346897	EGFR	GCGGTGGGGCCGGAGGGGCGT#GCCCCGGCGGCCGCCGCCGCC#((((((((((((..(((((..#)))))..))))).))))))).	101	122	0.846154	-40.2	1	9.52e-10	0.191	0.168917	-0.3389	-6.08354	17	21	7	5UTR		0	0
hsa-miR-6786-3p	NM_001346897	EGFR	TGACGCCCCTTCTGATTCTGCCT#GCAGACACAGTGAAGGGCGTA#..((((((...(((..(((((..#)))))..)))....)))))).	3524	3545	0.846154	-22.1	1	0.0159636	0.485	-0.244	-0.961966	-11.0492	14	21	6	CDS		0	0
hsa-miR-6787-5p	NM_001346897	EGFR	TGGCGGGGGTAGAGCTGGCTGC#GCAGCGATACAGCTCAGACCCCACAGGCGCCT#.(((((((((.(((((((((((#)))))....))))))..))))).....)))).	3323	3355	0.846154	-31.9	1	0.0103659	0.426	3.69814	1.90743	-6.6181	20	32	6	CDS		0	0
hsa-miR-6788-5p	NM_001346897	EGFR	CTGGGAGAAGAGTGGTGAAGA#CTTGACTGAGGACAGCATAGACGACACCTTCCTCCCAGT#(((((((..(((.((((..(.#.)..)))))))))))))).	3353	3392	1	-19.2	1	0.0210324	0.456	1.43496	2.48768	-8.59673	15	19	14	CDS		0	0
hsa-miR-6788-3p	NM_001346897	EGFR	TTCGCCACTTCCCTCCCTGCAG#CTGCAGGAGAGGGAGCTTGTGGAGCCTCTTACACCCAGTGGAGAAG#(((.((((((((((((((((((#))))))).))))))......................))))).))).	2172	2218	0.846154	-30.6	0	0.00560599	0.456	5.03386	4.15971	-6.9696	21	46	7	CDS		0	0
hsa-miR-6790-3p	NM_001346897	EGFR	CGACCTCGGCGACCCCTCACT#GTGAGGTGGTCCTTGGGA#...(((.((.((((((((((.#)))))).)))))).))).	433	451	0.923077	-22.8	0	4.68e-06	0.574	4.57503	2.87691	-9.30073	15	18	6	CDS		0	0
hsa-miR-6791-5p	NM_001346897	EGFR	CCCCTGGGGCTGGGCAGGCGGA#TGCCTTGTGCTCCCCCGAGGGCTGCTGGGGCCCGGAGCCCAGGGA#.(((((((.((((((.(((((.#.)))))...))))))..))))))).	1646	1691	0.923077	-34.5	1	4.56e-06	0.279	5.26343	1.96098	-5.08276	18	25	7	CDS		0	0
hsa-miR-6791-3p	NM_001346897	EGFR	TGCCTCCTTGGTCTCCGGCAG#CTGCTGGGTGCGGAAGAGAAAGAATACCATGCAGAAGGAGGCAA#(((((((((.((.((((((((#)))))))).)).)......................)))))))).	2706	2750	0.846154	-26	1	0.000809086	0.515	5.50539	5.51516	-6.46921	19	44	8	CDS		0	0
hsa-miR-6791-3p	NM_001346897	EGFR	TGCCTCCTTGGTCTCCGGCAG#TTGCCGGAATGTCAGCCGAGGCAGGGAA#(.((((((((((.((((((((#))))))))......))))))).))).).	1700	1728	0.846154	-26	1	3.25e-05	0.397	2.1952	3.70805	-6.39038	19	28	8	CDS		0	0
hsa-miR-6792-3p	NM_001346897	EGFR	CTCCTCCACAGCCCCTGCTCAT#GAGTCGGGCTCTGGAGGAA#.(((((((.(((((..((((..#)))).))))).))))))).	323	342	1	-27.9	1	9.48e-05	0.412	1.1119	1.34229	-5.81821	16	19	7	CDS		0	0
hsa-miR-6792-3p	NM_001346897	EGFR	CTCCTCCACAGCCCCTGCTCAT#GTGAGCCAAGGGAGTTTGTGGAGA#...(((((((((((((((((((#))))))..)))).))).)))))).	1756	1780	1	-26.7	0	0.0773237	0.441	3.33191	2.99374	-6.51454	19	24	6	CDS		0	0
hsa-miR-6793-5p	NM_001346897	EGFR	TGTGGGTTCTGGGTTGGGGTGA#GCTGCTGGGGCCCGGAGCCCAGGG#(.((((((((((((((.(((..#))).)...))))))))))))).).	1666	1690	0.846154	-26.7	1	1.64e-06	0.294	4.52334	2.30121	-5.10125	18	24	13	CDS		0	0
hsa-miR-6793-5p	NM_001346897	EGFR	TGTGGGTTCTGGGTTGGGGTGA#CTCCTCAACCTCCTCGACCCACT#.(((((((..(((((((((.(.#).)))))))))....))))))).	3425	3448	0.846154	-25.6	1	0.320944	0.412	-1.05203	0.727716	-6.09222	17	23	9	CDS		0	0
hsa-miR-6793-3p	NM_001346897	EGFR	TCCCCAACCCCTGCCCGCAG#CTGCGTCAAGACCTGCCCGGCAGGAGTCATGGGAGAA#((((((((.((((((.((((#.))))..)))))).))..)))).)).	1895	1932	1	-24.7	1	2.78e-05	0.426	4.28888	3.25012	-5.22701	18	26	6	CDS		0	0
hsa-miR-6794-5p	NM_001346897	EGFR	CAGGGGGACTGGGGGTGAGC#GCTCAGACCCCACAGGCGCCTTGA#(((((.(.((((((((((((#))))..))))).))).).))))).	3334	3358	0.846154	-27.2	0	0.0174226	0.426	3.93724	2.33653	-8.15217	18	24	5	CDS		0	0
hsa-miR-6794-5p	NM_001346897	EGFR	CAGGGGGACTGGGGGTGAGC#GCTCATGCCCTTCGGCTGCCTCCTGG#(((((((.(((((.((((((#)))))).)))...))...))))))).	2498	2524	0.923077	-27.1	1	1.02e-05	0.471	5.2265	4.68796	-7.10805	18	26	7	CDS		0	0
hsa-miR-6796-5p	NM_001346897	EGFR	TTGTGGGGTTGGAGAGCTGGCTG#CAGCGATACAGCTCAGACCCCACAGG#((((((((((...((((((((((#))))....)))))).)))))))))).	3324	3350	1	-29.7	1	0.0176738	0.441	3.64544	1.96635	-11.3983	20	26	10	CDS		0	0
hsa-miR-6796-3p	NM_001346897	EGFR	GAAGCTCTCCCCTCCCCGCAG#CTGCGGAGGCTGCTGCAGGAGAGGGAGCTTG#.((((((((((((((((((((#)))))).)).......))).).)))))))).	2160	2191	0.846154	-26.5	1	0.000340839	0.368	4.04972	3.68637	-3.79332	20	31	8	CDS		0	0
hsa-miR-6796-3p	NM_001346897	EGFR	GAAGCTCTCCCCTCCCCGCAG#CTGCTGGGGTGCAGGAGAGG#....((((((...((((((((#)))).))))....)))))).	719	739	0.846154	-23.6	0	0.000188606	0.456	5.7848	3.31695	-17.0073	14	20	6	CDS		0	0
hsa-miR-6797-5p	NM_001346897	EGFR	AGGAGGGAAGGGGCTGAGAACAGGA#TTCTTCAGCAGCCCCTCCACGTCACGGACTCCCCTCCTG#(((((((.((((((((.....((((#))))....))))))))...............))))))).	3192	3231	1	-27	1	0.000687785	0.426	3.4299	3.67181	-6.25121	19	39	8	CDS		0	1
hsa-miR-6797-5p	NM_001346897	EGFR	AGGAGGGAAGGGGCTGAGAACAGGA#CCTGGGGATCGGCCTCTTCA#......(((((((((((...((((.#))))....))))))))))).	2108	2128	0.923077	-26.1	0	0.00034499	0.353	2.47521	3.00324	-15.5666	15	20	11	CDS		0	1
hsa-miR-6798-3p	NM_001346897	EGFR	CTACCCCCCATCCCCCTGTAG#ATGGGCCTAAGATCCCGTCCATCGCCACTGGGATGGTGGGGG#...(((((((((((..((...#.))..))))))).)))).	2041	2083	0.923077	-23.6	0	1.75e-06	0.324	1.81754	2.99063	-7.48304	13	18	7	CDS		0	0
hsa-miR-6799-3p	NM_001346897	EGFR	TGCCCTGCATGGTGTCCCCACAG#GTGGTGGATGCCGACGAGTACCTCATCCCACAGCAGGGCT#.(((((((.((((((((((((..#)))).))))))))...................))))))).	3153	3193	1	-30.5	1	0.00044426	0.382	2.97471	4.03361	-4.84971	19	40	8	CDS		0	0
hsa-miR-6799-3p	NM_001346897	EGFR	TGCCCTGCATGGTGTCCCCACAG#CTGCTGGGTGCGGAAGAGAAAGAATACCATGCAGAAGGAGGCAA#(((((((((((((((((((((((#))).)))).).............))))))))))).....)))).	2706	2750	0.846154	-26.9	1	0.000809086	0.515	4.90228	5.52404	-3.93757	23	44	11	CDS		0	0
hsa-miR-6800-5p	NM_001346897	EGFR	GTAGGTGACAGTCAGGGGCGG#CGCTGCTGGCTGCGCTCTGCC#(((((((.(((((((.((((.#)))).)))))))))).)))).	298	319	0.846154	-28.3	1	1.94e-07	0.294	0.0564254	0.697452	-6.48426	18	21	10	CDS		0	0
hsa-miR-6800-5p	NM_001346897	EGFR	GTAGGTGACAGTCAGGGGCGG#TGCCACCTGTGCCATCCAAACTGCACCTACG#(((((((.((((((((((((.#)))).))))..........))))))))))).	1974	2005	0.846154	-26.8	1	0.0103171	0.412	3.93174	2.89994	-6.25121	19	31	11	CDS		0	0
hsa-miR-6800-5p	NM_001346897	EGFR	GTAGGTGACAGTCAGGGGCGG#TGCCGCCTGCTGGGCATCTGCC#(((((((.(((.((((((((.#)))).)))))))..))))))).	2448	2470	0.846154	-25.4	1	3.81e-05	0.338	4.5255	5.56506	-9.59801	18	22	7	CDS		0	0
hsa-miR-6800-5p	NM_001346897	EGFR	GTAGGTGACAGTCAGGGGCGG#CTGCCTCAGGCCATGAACATCACCTGCA#(((((((((((((.(((((((#))))))).)))..))....)))))))).	1812	1840	0.974359	-24.8	1	0.0415501	0.412	2.79897	2.94173	-4.79441	20	28	8	CDS		0	0
hsa-miR-6800-3p	NM_001346897	EGFR	CACCTCTCCTGGCATCGCCCC#GGGAGCTGCTGGGGTGCAGGAGAGGA#..(((((((((....((((((#.))))))))))))))).	714	740	0.846154	-27	1	0.000656959	0.471	5.68897	3.46763	-11.1852	15	17	15	CDS		0	0
hsa-miR-6800-3p	NM_001346897	EGFR	CACCTCTCCTGGCATCGCCCC#GGGTGAGCCAAGGGAGTTTGTGG#((((((((.((((.((((((.#)))))))))).)))))...))).	1754	1777	1	-26	1	0.0109361	0.456	2.84651	3.00484	-5.8508	18	23	10	CDS		0	0
hsa-miR-6801-5p	NM_001346897	EGFR	TGGTCAGAGGCAGCAGGAAATGA#TCTCTGCTGGCTCTATCTTGACCT#.((((((((.((((((((.....#)).)))))).)))).....)))).	3760	3784	0.923077	-23.4	1	0.00383708	0.662	0.0221233	-0.197509	-5.03583	16	24	6	3UTR		0	0
hsa-miR-6801-3p	NM_001346897	EGFR	ACCCCTGCCACTCACTGGCC#GGCCCTCCTCTTGCTGCTGGTGGTGGCCCTGGGGA#.((((.(((((.(((((((.#.))))))))))))...)))).	2081	2116	0.846154	-27.5	0	1.2e-05	0.324	1.99321	2.00706	-9.04109	16	21	12	CDS		0	0
hsa-miR-6802-5p	NM_001346897	EGFR	CTAGGTGGGGGGCTTGAAGC#CTTCAGCAGCCCCTCCACG#....(((((((((((((((.#)))))..)))))).)))).	3194	3213	0.923077	-24.1	0	0.0106749	0.368	4.36103	3.63035	-9.54656	15	19	6	CDS		0	0
hsa-miR-6803-3p	NM_001346897	EGFR	TCCCTCGCCTTCTCACCCTCAG#CTGGAGGGTGAGCCAAGGGAGTTTGTGGAG#((((((.(((((((((((((((#))).))))))))..))))))).....))).	1749	1779	1	-25.2	0	0.0567787	0.456	3.58055	2.84505	-5.48126	21	30	8	CDS		0	0
hsa-miR-6803-3p	NM_001346897	EGFR	TCCCTCGCCTTCTCACCCTCAG#CTGGGGTGCAGGAGAGGAGAA#((((((.(((...(((((.(((#)))))))).))).)))).)).	722	743	0.846154	-23	0	0.00156977	0.456	0.380952	3.46842	-12.942	17	21	8	CDS		0	0
hsa-miR-6804-5p	NM_001346897	EGFR	TGAGGGTGTCAGCAGGTGACG#CGAGGGCTGCTGGGGCCCG#...((((.(((((((.(..((#))..).))))))).)))).	1661	1680	0.846154	-23.4	0	7.12e-09	0.294	7.00721	2.10879	-9.06122	14	19	7	CDS		0	0
hsa-miR-6804-3p	NM_001346897	EGFR	CGCACCTGCCTCTCACCCACAG#CTGGCCAAACTGCTGGGTGCGGAAGAGAAAGAATACCATGCAGAAGGAGGCAAAGTGCC#.((((.((((((((((((((((#.))).))))))..........................)))))))..)))).	2697	2756	0.846154	-26.8	0	2.76e-05	0.574	4.81692	5.7535	-5.69428	20	51	7	CDS		0	0
hsa-miR-6805-5p	NM_001346897	EGFR	TAGGGGGCGGCTTGTGGAGTGT#ACGCCACAACCACCGCGCACGGCCCCCTGA#((((((((((.((((((.((..#)).))))))))..........)))))))).	179	209	0.974359	-25.8	1	0.00179502	0.309	-0.195362	-0.363379	-6.76235	18	30	8	5UTR		0	0
hsa-miR-6805-3p	NM_001346897	EGFR	TTGCTCTGCTCCCCCGCCCCCAG#CTGGAGGGTGAGCCAAGGGAGTTTGTGGAGA#...((((((((((((((((((((#)))).))))).)....))))))....)))).	1749	1780	0.923077	-26.2	0	0.0773237	0.441	3.14384	2.84772	-6.51454	20	31	6	CDS		0	0
hsa-miR-6806-5p	NM_001346897	EGFR	TGTAGGCATGAGGCAGGGCCCAGG#GGGCCCTCCTCTTGCTGCT#.(((.(((.((((.(((((((...#))))))))))).)))))).	2080	2099	0.923077	-30.4	0	0.0110206	0.324	3.3722	1.93815	-9.82559	17	19	11	CDS		0	0
hsa-miR-6806-5p	NM_001346897	EGFR	TGTAGGCATGAGGCAGGGCCCAGG#CCTGCCCCCCACTCATGCTCTACAA#((((((((((((...(((..((((#))))..)))..))))))).))))).	913	938	0.846154	-28.3	1	0.475973	0.412	2.59173	4.09989	-6.81899	19	25	7	CDS		0	0
[truncated: 12,479 more rows]

## Sheet: TargetScan
miRNA	Position in the UTR	seed match	context++ score	context++ score percentile	weighted context++ score	conserved branch length	Pct	Predicted relative KD
[truncated: 39 more rows]

[truncated: 3 more sheets: EGFR-fasta, hsa-miR-7-5p-fasta, miRanda]
